# Supplementary material
Source: HighWire-hosted journal article supplement (http://molpharm.aspetjournals.org/highwire/filestream/85076/field_highwire_adjunct_files/2/119776_Supplemental_file_2.xlsx)
Supplement: 119776_Supplemental_file_2.xlsx [file 119776_Supplemental_file_2.xlsx]

## Sheet: Gene-Level Data
	Column Headers:
	SRA	Strict/Relaxed/All quality bins (SRA in gpGrouper e2g output)
	Pept	count of distinct peptide sequences (PeptideCount in gpGrouper e2g output)
	PSMs	spectral counts (PSMs in gpGrouper e2g output)
	iBAQ	iBAQ based on sum of all peptide peak areas with shared peptide quantities distributed (iBAQ_dstrAdj in gpGrouper e2g output)
		Exp # 34179				Exp # 34609				Exp # 34180				Exp # 34610				Exp # 34181				Exp # 34611				Exp # 34182				Exp # 34612				Exp # 34183				Exp # 34613				Exp # 34184				Exp # 34614
		EtOH control (batch #1)				EtOH control (batch #2)				100nM E2 (batch #1)				100nM E2 (batch #2)				1uM Endoxifen (batch #1)				1uM Endoxifen (batch #2)				1uM BPTPE(batch #1)				1uM BPTPE(batch #2)				1uM 3OHTPE (batch #1)				1uM 3OHTPE (batch #2)				1uM 2OHTPE (batch #1)				1uM 2OHTPE (batch #2)
GeneID	GeneSymbol	SRA	Pept	PSMs	iBAQ	SRA	Pept	PSMs	iBAQ	SRA	Pept	PSMs	iBAQ	SRA	Pept	PSMs	iBAQ	SRA	Pept	PSMs	iBAQ	SRA	Pept	PSMs	iBAQ	SRA	Pept	PSMs	iBAQ	SRA	Pept	PSMs	iBAQ	SRA	Pept	PSMs	iBAQ	SRA	Pept	PSMs	iBAQ	SRA	Pept	PSMs	iBAQ	SRA	Pept	PSMs	iBAQ
5591	PRKDC	S	281	1113	379	S	299	1386	137	S	268	1188	500	S	292	1448	199	S	234	1291	425	S	290	1316	235	S	246	1195	392	S	309	1341	116	S	262	1124	407	S	312	1301	204	S	286	1358	534	S	295	1272	222
7153	TOP2A	S	100	293	76.4	S	95	265	13.4	S	92	270	81.7	S	86	232	17.8	S	86	310	77.3	S	88	198	20.7	S	88	259	74.3	S	96	229	12.3	S	92	254	82.4	S	81	189	17.8	S	97	283	84.9	S	80	193	18.3
1523	CUX1	S	93	235	82.2	S	108	294	29.1	S	87	234	110	S	96	293	44.7	S	88	263	85.5	S	89	246	48.2	S	82	239	88.2	S	100	265	24.4	S	84	239	94.9	S	93	251	37.7	S	95	262	93.6	S	94	258	42.8
7155	TOP2B	S	93	276	79.9	S	61	141	3.6	S	76	244	93.6	S	65	145	5.4	S	82	274	78.7	S	63	127	7.2	S	87	246	70.3	S	77	161	3.5	S	78	246	101	S	57	116	4.7	S	85	255	80	S	51	109	4.6
1108	CHD4	S	81	216	37.3	S	83	218	8.6	S	74	201	52.5	S	82	210	11.6	S	70	237	35.6	S	70	197	15.5	S	60	163	38.7	S	75	197	6.7	S	70	198	42.8	S	76	185	11.4	S	76	229	47.7	S	78	209	13.6
8295	TRRAP	S	78	104	2.1	S	71	101	0.49	S	80	108	3.2	S	69	119	0.66	S	56	88	1.7	S	69	100	0.76	S	59	88	1.5	S	69	108	0.3	S	60	79	1.8	S	69	114	0.74	S	71	107	2.8	S	70	100	0.79
142	PARP1	S	74	306	398	S	80	357	120	S	79	329	507	S	74	339	170	S	71	322	427	S	76	310	173	S	63	292	390	S	79	327	95.5	S	74	288	538	S	80	310	157	S	75	310	508	S	72	309	158
6596	HLTF	S	69	300	211	S	76	328	60.8	S	70	323	266	S	71	343	83.3	S	64	339	205	S	69	320	84.8	S	67	317	210	S	72	291	54.3	S	63	290	267	S	67	270	71.9	S	73	341	253	S	70	286	81.3
4926	NUMA1	S	66	102	4.3	S	94	152	2.3	S	66	103	5.7	S	98	156	3.8	S	63	101	3.8	S	107	180	6	S	65	105	4.6	S	106	176	2.6	S	65	103	5.6	S	106	183	4.9	S	72	109	5.6	S	126	214	7.5
8467	SMARCA5	S	66	199	100	S	59	171	13.1	S	64	200	108	S	57	172	17.6	S	61	187	83.3	S	58	153	18.7	S	58	176	78	S	64	174	11.6	S	67	194	118	S	59	147	14.5	S	70	211	125	S	55	138	15.6
4288	MKI67	S	66	89	2	S	53	69	0.36	S	52	74	2.5	S	47	67	0.48	S	57	90	2.4	S	43	54	0.69	S	52	79	1.9	S	47	65	0.32	S	46	60	1.9	S	51	70	0.66	S	60	83	2.4	S	51	74	0.62
7150	TOP1	S	65	367	936	S	67	485	363	S	69	362	1117	S	76	556	524	S	64	407	934	S	69	545	521	S	62	364	1012	S	73	404	437	S	67	363	1101	S	65	405	401	S	71	432	1139	S	69	406	364
4297	KMT2A	S	64	117	2.3	S	51	81	0.34	S	51	96	2.6	S	59	91	0.56	S	57	101	2.7	S	50	75	0.81	S	52	88	2.4	S	52	76	0.33	S	49	82	3.4	S	61	86	0.73	S	62	102	3.1	S	56	79	0.84
3980	LIG3	S	60	162	101	S	64	241	37.8	S	51	162	112	S	59	186	53.4	S	46	158	96.4	S	56	179	58.6	S	51	151	99	S	62	199	33.9	S	51	155	124	S	57	187	42	S	57	170	103	S	52	212	38.6
1107	CHD3	S	58	139	10.3	S	62	122	3.9	S	56	127	12.3	S	56	134	3.8	S	52	125	8.6	S	55	109	5.8	S	44	92	10.3	S	61	133	2.6	S	47	117	13.9	S	53	105	4.1	S	59	127	16.1	S	57	114	4.2
2547	XRCC6	S	58	273	712	S	55	296	229	S	42	287	589	S	56	285	342	S	43	322	657	S	56	305	320	S	53	306	785	S	61	234	299	S	50	338	598	S	56	295	243	S	52	372	632	S	58	271	207
11177	BAZ1A	S	56	106	39.4	S	48	80	3.7	S	56	103	46.7	S	44	83	6.2	S	52	122	41.3	S	46	77	7.5	S	49	110	32.4	S	54	89	4.5	S	56	108	38.3	S	43	73	5.7	S	58	126	44.5	S	40	60	5
2956	MSH6	S	54	142	35.7	S	49	110	5.9	S	52	150	44.9	S	53	121	7.7	S	49	148	38.6	S	51	107	9.3	S	42	126	32.5	S	55	124	5.5	S	49	140	51.9	S	54	122	7.1	S	48	132	48.4	S	45	96	8.7
7343	UBTF	S	53	216	270	S	45	132	33.1	S	56	233	269	S	42	144	43.6	S	49	216	232	S	43	134	44.1	S	48	169	157	S	41	109	41.7	S	61	170	272	S	36	106	30.2	S	55	199	258	S	38	103	35.5
4436	MSH2	S	51	151	69.7	S	48	134	12.7	S	46	134	87.3	S	48	124	20.8	S	43	147	73.9	S	45	104	22.8	S	46	165	72.8	S	53	128	12	S	47	150	87.2	S	52	110	14.7	S	48	151	69	S	48	145	16
7112	TMPO	S	50	230	732	S	20	31	3.6	S	47	298	699	S	21	33	4.3	S	50	371	723	S	22	38	6.7	S	48	314	1596	S	21	39	3.8	S	46	265	486	S	18	22	2.9	S	47	328	600	S	26	51	4.4
54617	INO80	S	49	114	20.1	S	54	107	3.4	S	35	95	18.7	S	40	95	5.2	S	37	109	17.8	S	42	86	5.9	S	42	97	18.4	S	46	95	3.1	S	42	102	21.6	S	41	89	4.9	S	44	111	22.4	S	40	80	4.9
4798	NFRKB	S	48	96	28.3	S	51	110	6.7	S	48	109	36	S	57	108	7.6	S	48	118	28.6	S	53	107	10.5	S	47	102	28.1	S	51	109	5.1	S	50	111	37.8	S	56	107	9.9	S	51	104	40.2	S	49	88	9.5
57680	CHD8	S	48	61	3.2	S	43	61	0.7	S	43	67	5.2	S	39	61	0.9	S	42	80	4.6	S	49	74	1.6	S	37	61	3.7	S	49	76	0.71	S	41	62	3.6	S	45	69	0.99	S	43	63	4.1	S	59	91	2.4
54897	CASZ1	S	46	111	17.2	S	41	87	4.9	S	45	129	24.2	S	46	108	7.7	S	41	119	16.5	S	49	101	8.5	S	37	101	19.7	S	50	118	3.9	S	42	114	22.2	S	51	99	7.3	S	49	125	22.1	S	49	107	8.3
64324	NSD1	S	45	88	2.4	S	45	83	0.82	S	34	65	2.8	S	46	88	1	S	42	82	2.9	S	40	64	1.3	S	35	59	2.1	S	37	66	0.53	S	36	66	2.7	S	47	76	1.2	S	44	78	2.6	S	44	73	1.3
6949	TCOF1	S	44	118	22.5	S	52	129	6.6	S	41	97	17.5	S	51	138	9.3	S	48	134	24.1	S	53	127	10.4	S	49	125	23.2	S	42	97	4.7	S	51	121	26.7	S	50	116	7.9	S	50	130	24.2	S	57	133	9.3
463	ZFHX3	S	44	61	1.4	S	32	49	0.24	S	32	50	1.6	S	35	47	0.32	S	34	55	1.7	S	34	53	0.37	S	34	51	1.3	S	31	43	0.19	S	32	49	1.5	S	37	54	0.4	S	42	65	1.8	S	33	43	0.38
4437	MSH3	S	43	81	8.7	S	36	70	2.9	S	40	63	12.1	S	36	69	3.1	S	28	40	7.8	S	39	72	4	S	32	54	8	S	38	76	2.4	S	36	70	13.8	S	34	70	3.6	S	38	71	11.4	S	31	57	3.1
7520	XRCC5	S	42	216	583	S	50	300	170	S	42	298	476	S	48	275	236	S	41	320	488	S	52	312	223	S	40	241	484	S	54	217	215	S	46	246	450	S	51	248	169	S	48	252	440	S	53	262	153
91748	ELMSAN1	S	41	88	7.5	S	28	56	1.7	S	36	82	10.2	S	33	67	2.1	S	30	85	7.7	S	27	54	3.1	S	34	76	9.2	S	29	56	1.3	S	34	86	12.5	S	29	50	2.3	S	33	72	11.2	S	24	48	2.2
6239	RREB1	S	40	81	17	S	39	82	3.5	S	36	75	20.9	S	42	93	5	S	37	85	14.6	S	42	94	7	S	24	63	12.7	S	42	104	3.6	S	38	85	19	S	44	92	6.7	S	43	93	17.8	S	41	85	7.5
23523	CABIN1	S	38	53	1.9	S	39	49	0.44	S	26	39	1.3	S	40	59	0.76	S	28	49	1.8	S	34	44	0.91	S	30	48	1.4	S	34	50	0.44	S	31	47	1.8	S	34	48	0.78	S	35	56	2.2	S	39	50	0.71
7227	TRPS1	S	38	68	11.8	S	34	58	3	S	34	68	12.5	S	29	57	3.5	S	31	70	10.4	S	33	56	4.7	S	30	58	9.3	S	31	57	2.1	S	39	75	15.4	S	32	58	3.7	S	38	64	12.3	S	33	67	4.1
3848	KRT1	S	37	126	76.6	S	42	228	77.2	S	31	96	90	S	42	191	75.6	S	33	85	55	S	42	212	89	S	28	88	49.9	S	42	153	69.7	S	27	64	30	S	40	173	50.3	S	40	140	144	S	44	189	58.8
9219	MTA2	S	36	72	57	S	36	77	15.5	S	34	90	62.6	S	34	78	20.9	S	38	102	76.1	S	40	90	19.9	S	39	77	80.4	S	35	68	18.7	S	35	77	55.7	S	37	86	14.9	S	34	83	58.3	S	33	72	13
57634	EP400	S	36	49	0.58	S	33	51	0.26	S	29	49	0.91	S	32	51	0.3	S	28	40	0.72	S	33	51	0.53	S	27	43	0.62	S	36	57	0.27	S	22	36	0.5	S	39	61	0.41	S	33	50	0.9	S	45	66	0.66
9320	TRIP12	S	34	47	3.6	S	41	62	0.45	S	27	41	2	S	34	51	0.72	S	29	49	2	S	35	52	0.97	S	26	45	3.4	S	36	63	0.48	S	25	37	1.6	S	31	44	0.75	S	30	41	2.6	S	35	53	1.1
9757	KMT2B	S	34	50	2.9	S	36	49	0.44	S	32	48	2.8	S	31	47	0.76	S	32	56	3.2	S	33	52	1.1	S	30	43	2.4	S	34	53	0.52	S	32	52	3.3	S	36	45	0.82	S	28	44	3	S	34	47	0.79
57673	BEND3	S	33	100	21.3	S	28	84	4.3	S	31	80	28.3	S	29	100	7	S	25	78	22.3	S	29	96	7.1	S	26	69	24.9	S	33	98	4.6	S	32	107	31.5	S	28	89	6.1	S	29	95	27.2	S	24	76	4.5
55127	HEATR1	S	33	46	1.7	S	27	38	0.31	S	29	46	2.2	S	27	46	0.57	S	29	48	1.5	S	24	36	0.64	S	23	40	1.6	S	27	37	0.34	S	23	35	1.2	S	22	38	0.42	S	23	40	1.6	S	24	44	0.54
3192	HNRNPU	S	32	95	134	S	42	171	112	S	33	98	156	S	39	189	146	S	28	98	127	S	38	159	155	S	30	107	135	S	41	165	96.7	S	34	112	181	S	37	157	123	S	34	108	198	S	40	170	147
7508	XPC	S	32	74	23.6	S	34	85	8.2	S	30	66	28.8	S	32	75	9.8	S	28	79	30.4	S	28	63	9.3	S	26	76	30.5	S	30	73	6.9	S	22	61	27.6	S	24	51	8.9	S	29	69	31.5	S	27	57	11.8
6942	TCF20	S	32	50	3.5	S	28	43	0.9	S	30	58	5.1	S	29	44	1	S	29	52	3.3	S	29	49	2	S	25	40	2.3	S	27	51	0.96	S	30	45	2.9	S	25	44	0.98	S	29	56	4.8	S	34	58	1.6
6117	RPA1	S	31	92	88.9	S	35	186	69.9	S	27	103	79.7	S	39	166	81.5	S	28	116	88.1	S	37	189	79	S	28	112	101	S	38	130	86.8	S	29	125	80.8	S	36	175	59.7	S	27	88	69	S	36	173	58.5
58525	WIZ	S	31	85	21.5	S	32	58	3.9	S	35	74	28.3	S	32	55	4.8	S	32	93	21.7	S	29	50	5.8	S	27	66	19	S	34	60	3.8	S	39	62	25.5	S	26	59	4.6	S	34	75	28.3	S	24	49	3.7
54815	GATAD2A	S	31	87	50.5	S	25	76	8.7	S	27	111	48	S	28	71	13	S	29	124	52.8	S	30	74	11.6	S	29	99	51.8	S	28	76	9.5	S	31	100	43.6	S	28	71	10	S	27	102	44.5	S	30	73	10.1
3312	HSPA8	S	31	102	90.5	S	25	81	21.4	S	26	116	85.7	S	29	78	32.4	S	29	127	94.4	S	30	85	33.7	S	27	103	107	S	29	70	30.1	S	25	106	72.4	S	32	71	23.3	S	26	97	79.6	S	31	92	24.7
10856	RUVBL2	S	30	106	142	S	30	100	38.3	S	30	143	171	S	28	97	55.4	S	30	177	234	S	31	112	55.5	S	30	153	232	S	31	81	54.6	S	26	134	189	S	28	119	43.9	S	27	144	208	S	29	93	35.8
3054	HCFC1	S	30	55	7.2	S	30	57	1.8	S	29	49	7.9	S	32	69	2.9	S	27	58	8.5	S	34	67	3.7	S	28	51	8.6	S	29	69	2	S	32	57	11.3	S	27	60	2.1	S	33	59	11	S	33	68	3.1
50485	SMARCAL1	S	29	50	7.7	S	34	74	3.1	S	22	42	8	S	34	67	4.4	S	19	43	6.1	S	29	54	5.4	S	19	33	6	S	31	67	2.8	S	22	42	8.6	S	26	45	3.6	S	24	47	6.9	S	33	57	4.3
57473	ZNF512B	S	29	70	21.5	S	32	86	6.4	S	28	58	18.9	S	30	78	9.5	S	27	60	22.2	S	23	70	12.7	S	26	59	16.7	S	28	71	7.9	S	32	66	26.2	S	27	68	7.8	S	27	64	15.7	S	25	68	8
7156	TOP3A	S	29	71	15.7	S	29	80	5.7	S	31	70	23	S	34	86	7	S	21	61	15.8	S	25	64	7.3	S	29	61	16	S	33	83	4.5	S	33	72	20.6	S	27	62	6	S	31	72	20.1	S	31	77	6.3
55636	CHD7	S	29	44	1	S	14	25	0.08	S	26	47	0.45	S	9	12	0.004	S	22	43	0.3	S	15	22	0.02	S	24	42	0.7	S	19	24	0.02	S	26	49	0.47	S	16	26	0.1	S	28	50	0.44	S	18	29	0.02
3181	HNRNPA2B1	S	28	107	273	S	36	150	157	S	27	126	373	S	33	177	265	S	25	137	408	S	30	190	245	S	30	127	466	S	34	122	283	S	30	152	454	S	36	195	183	S	27	147	414	S	31	127	172
79977	GRHL2	S	28	85	34.3	S	23	49	3.3	S	27	87	41.1	S	25	62	7.4	S	29	99	50.3	S	21	50	4.8	S	29	116	62.6	S	26	48	4.2	S	26	78	28.1	S	24	54	3.8	S	28	120	46.1	S	29	62	5
29994	BAZ2B	S	28	38	1.1	S	15	19	0.13	S	21	28	1.6	S	27	37	0.34	S	21	32	1.1	S	20	27	0.3	S	20	25	0.96	S	25	35	0.18	S	28	41	1.7	S	19	23	0.27	S	29	43	1.4	S	21	29	0.28
9656	MDC1	S	28	41	1.4	S	10	12	0.13	S	23	34	1.8	S	13	15	0.19	S	29	44	1.3	S	17	23	0.36	S	25	38	0.9	S	10	12	0.09	S	23	32	1.9	S	18	23	0.27	S	25	38	2.1	S	20	26	0.24
8607	RUVBL1	S	27	71	133	S	26	90	34.7	S	28	106	185	S	26	94	54.1	S	29	104	233	S	24	92	45.6	S	26	92	263	S	27	78	43.2	S	25	91	186	S	25	93	42	S	26	95	193	S	26	90	32.6
23028	KDM1A	S	27	78	31.4	S	25	72	6.8	S	27	66	40.9	S	29	92	11.6	S	30	83	32	S	28	73	12.7	S	24	80	32.5	S	27	78	5.5	S	28	72	38.7	S	27	69	8.2	S	25	72	43.3	S	26	70	10.7
3849	KRT2	S	26	59	17	S	32	79	4.9	S	12	45	2.8	S	24	63	6.3	S	23	56	8.9	S	27	85	8.8	S	19	43	4.6	S	23	56	3	S	12	28	2.4	S	22	49	2.9	S	24	59	12.1	S	31	74	5.8
5981	RFC1	S	26	53	4	S	28	67	1.2	S	18	34	4.2	S	28	63	1.6	S	22	40	3.7	S	25	57	1.8	S	22	39	3.4	S	29	62	1.4	S	23	41	5.5	S	26	56	1.8	S	23	41	5	S	26	56	2.3
641	BLM	S	25	37	1.9	S	26	32	0.44	S	19	28	2.6	S	17	29	0.49	S	22	39	2.5	S	19	25	0.49	S	19	28	1.7	S	15	25	0.24	S	20	25	2.4	S	16	20	0.51	S	19	24	2.5	S	14	16	0.47
5925	RB1	S	25	42	6.6	S	20	29	0.79	S	24	49	9	S	19	27	1.3	S	19	38	6.2	S	19	26	1.7	S	21	27	6.7	S	21	33	0.69	S	19	27	5.8	S	12	26	0.81	S	18	27	6.7	S	14	28	0.91
54880	BCOR	S	25	31	0.87	S	18	25	0.15	S	17	25	0.95	S	11	24	0.2	S	17	34	0.91	S	13	22	0.27	S	18	27	1.2	S	18	27	0.11	S	19	30	0.98	S	10	14	0.17	S	19	32	1.3	S	13	18	0.19
9112	MTA1	S	24	47	14.2	S	24	42	3.7	S	21	64	14.1	S	26	51	5.5	S	22	71	15.1	S	29	51	6.2	S	25	66	17.5	S	28	49	5.6	S	18	50	10.5	S	22	42	3.8	S	17	38	12.6	S	27	49	2.8
2975	GTF3C1	S	24	29	0.96	S	23	28	0.23	S	19	28	0.98	S	27	35	0.38	S	24	38	0.83	S	32	43	0.66	S	19	26	0.8	S	23	27	0.16	S	15	20	0.7	S	26	35	0.44	S	24	32	0.91	S	34	45	0.77
23613	ZMYND8	S	23	41	3	S	36	73	1.8	S	26	48	4.8	S	30	74	2.5	S	23	44	2.7	S	26	57	2	S	25	52	3.6	S	28	54	1	S	23	45	4	S	31	58	2.1	S	26	48	5	S	34	72	2.4
11198	SUPT16H	S	23	35	3.4	S	29	54	1.7	S	18	31	4.6	S	29	72	3.3	S	18	32	4.1	S	27	63	2.9	S	18	30	4.5	S	29	59	1.8	S	18	27	2.7	S	27	76	2.8	S	28	41	8.3	S	33	60	3.4
10919	EHMT2	S	23	44	2.6	S	25	53	1.2	S	15	29	2.4	S	27	41	1	S	21	40	2.6	S	18	31	1.3	S	15	29	1.8	S	22	41	0.74	S	19	33	3.2	S	19	31	0.89	S	14	28	2.8	S	18	37	1.4
23152	CIC	S	23	32	1.7	S	20	31	0.38	S	23	37	3	S	20	34	0.65	S	24	43	2.3	S	20	30	0.9	S	18	31	1.3	S	22	42	0.41	S	20	28	2.8	S	24	33	0.63	S	31	49	3.7	S	27	40	0.87
3858	KRT10	S	22	64	60.9	S	28	98	16.5	S	18	43	17.4	S	26	67	21.4	S	18	61	34.1	S	26	74	30.1	S	17	51	16.3	S	24	59	10.8	S	15	36	10.6	S	20	50	10.3	S	21	73	68.8	S	25	80	20.8
55689	YEATS2	S	22	29	1.3	S	24	34	0.37	S	22	29	1.7	S	20	32	0.46	S	19	29	1.2	S	17	25	0.53	S	19	29	1.4	S	18	23	0.26	S	22	31	1.7	S	19	27	0.46	S	18	25	1.4	S	18	26	0.63
203068	TUBB	S	22	104	172	S	24	185	62.4	S	17	97	177	S	25	199	86.3	S	20	156	305	S	25	232	107	S	23	167	334	S	25	133	126	S	26	165	233	S	23	182	71.8	S	23	165	208	S	26	257	103
5813	PURA	S	22	57	146	S	20	84	71	S	14	50	149	S	18	68	112	S	15	67	142	S	19	87	99.6	S	16	64	186	S	16	44	73.8	S	18	69	159	S	18	79	92.7	S	18	90	160	S	17	69	62.9
58508	KMT2C	S	22	29	0.17	S	16	20	0.04	S	19	34	0.3	S	23	29	0.08	S	19	29	0.17	S	15	19	0.05	S	16	24	0.14	S	12	17	0.01	S	18	28	0.22	S	23	29	0.12	S	17	28	0.31	S	22	30	0.07
2068	ERCC2	S	22	46	12.4	S	16	29	1.2	S	17	51	9.7	S	16	27	4.1	S	14	42	9.6	S	14	21	1.5	S	19	43	14.2	S	16	26	1.9	S	17	38	7.5	S	16	29	3.5	S	17	34	10.7	S	14	26	1.5
57459	GATAD2B	S	21	58	29.1	S	25	78	8.8	S	22	95	27.5	S	24	72	14	S	21	102	29.1	S	26	66	13.1	S	22	75	36.7	S	25	56	11.8	S	21	75	25.3	S	21	58	5.9	S	22	86	25.6	S	26	57	8
57504	MTA3	S	21	46	45.7	S	20	54	12.7	S	21	66	45.2	S	20	51	15.8	S	24	79	61.8	S	21	58	14.9	S	27	74	60.5	S	19	41	9.4	S	21	67	48.7	S	16	42	8.5	S	18	49	37.1	S	22	50	8.1
79913	ACTR5	S	21	62	30.3	S	20	42	4.9	S	19	99	24.8	S	16	33	7.3	S	19	111	28.7	S	16	38	5.9	S	19	89	39.2	S	19	30	6.7	S	17	81	25	S	14	36	4.7	S	17	72	19.5	S	14	31	3.1
56946	C11orf30	S	21	26	0.65	S	20	32	0.3	S	15	22	0.86	S	24	34	0.38	S	18	27	0.89	S	18	25	0.43	S	17	25	0.78	S	21	28	0.18	S	15	25	0.7	S	21	33	0.41	S	18	21	0.8	S	21	31	0.6
7707	ZNF148	S	21	42	10.1	S	18	37	0.45	S	21	53	17.9	S	14	31	0.66	S	17	39	2.2	S	17	30	1.1	S	16	34	2.9	S	17	34	0.59	S	18	39	4	S	12	27	0.52	S	21	42	10.5	S	20	42	0.91
7022	TFAP2C	S	21	54	22.1	S	15	54	9.8	S	13	54	30.9	S	17	61	14.9	S	18	69	34.7	S	14	58	8.3	S	20	83	32.1	S	16	35	15.2	S	16	58	47.1	S	14	61	6.1	S	16	62	15.9	S	16	51	7.4
22882	ZHX2	S	21	31	3.7	S	14	19	0.39	S	25	38	4.4	S	17	23	0.71	S	23	40	5.8	S	11	19	0.79	S	14	29	3.7	S	13	16	0.37	S	23	36	4.6	S	13	22	0.51	S	23	36	6.2	S	14	22	0.79
31	ACACA	S	21	27	0.38	S	9	15	0.04	S	18	22	0.35	S	18	23	0.06	S	16	27	0.37	S	11	16	0.07	S	13	18	0.19	S	13	19	0.01	S	15	26	0.38	S	11	14	0.06	S	14	19	0.38	S	18	24	0.09
3857	KRT9	S	20	68	30.1	S	29	112	35.1	S	21	86	48.2	S	25	91	39.5	S	17	54	18.3	S	31	122	56.3	S	18	57	28.7	S	27	103	46.9	S	17	38	14.4	S	28	89	34.8	S	21	80	66.2	S	31	109	40
29855	UBN1	S	20	26	2.7	S	24	41	0.86	S	22	32	4.1	S	24	37	1.3	S	19	33	3.3	S	25	42	1.8	S	17	25	2.5	S	27	39	1.2	S	21	36	5.5	S	25	44	1.4	S	24	35	4.9	S	24	38	1.6
2099	ESR1	S	20	117	176	S	23	135	63.3	S	20	158	172	S	22	125	72	S	23	181	217	S	23	151	74.7	S	20	144	239	S	22	78	73.5	S	20	160	177	S	24	125	54.2	S	17	161	123	S	21	112	39
2186	BPTF	S	20	26	0.32	S	22	27	0.11	S	19	24	0.47	S	21	27	0.18	S	18	28	0.41	S	27	40	0.28	S	16	25	0.31	S	28	37	0.15	S	15	17	0.37	S	25	36	0.19	S	21	30	0.61	S	30	46	0.29
254048	UBN2	S	20	30	1.9	S	21	35	0.4	S	20	33	3.1	S	19	38	0.69	S	18	30	2.5	S	22	38	0.99	S	19	31	2.4	S	20	40	0.44	S	23	33	3.2	S	17	31	0.53	S	19	35	2.8	S	14	23	0.64
7020	TFAP2A	S	20	41	50.8	S	21	74	18.5	S	14	37	40.4	S	20	57	26.6	S	19	58	51.8	S	19	36	26.8	S	17	55	59.9	S	24	42	19.6	S	17	52	61.7	S	18	44	20.4	S	16	52	45.6	S	20	50	15.4
3835	KIF22	S	20	42	11.4	S	20	35	2.3	S	13	23	8.5	S	20	42	3.2	S	16	34	12.1	S	23	45	2.9	S	18	39	13.9	S	23	33	3.3	S	17	32	9.2	S	20	44	2.7	S	15	34	8.3	S	23	36	1.8
90378	SAMD1	S	20	69	251	S	19	82	91.5	S	17	92	215	S	23	82	128	S	20	92	259	S	23	100	140	S	20	86	264	S	23	63	106	S	18	96	182	S	22	89	94.7	S	19	99	221	S	23	82	88.6
55133	SRBD1	S	20	26	4.5	S	18	31	0.76	S	16	29	5.9	S	16	26	0.79	S	21	29	4	S	20	29	1.6	S	20	33	5.7	S	18	31	0.88	S	19	32	6.8	S	20	32	1.2	S	21	34	7.6	S	20	32	1.3
79813	EHMT1	S	20	25	2.2	S	16	33	0.53	S	14	20	2.2	S	18	26	0.85	S	21	35	3	S	21	33	1.3	S	16	24	1.9	S	20	35	0.79	S	19	29	3.2	S	20	29	0.82	S	20	31	3	S	20	32	1.2
49854	ZBTB21	S	20	26	2.2	S	12	17	0.26	S	12	18	1.3	S	16	17	0.42	S	18	33	1.5	S	13	22	0.63	S	9	16	0.82	S	13	19	0.12	S	14	23	1.2	S	11	13	0.43	S	14	20	1.3	S	11	17	0.57
3184	HNRNPD	S	19	47	177	S	25	80	107	S	17	72	221	S	21	76	139	S	18	86	268	S	20	64	139	S	22	82	306	S	22	57	132	S	18	69	222	S	18	65	95.8	S	18	59	190	S	21	67	86.7
9678	PHF14	S	19	48	6.8	S	25	71	3	S	16	45	8.5	S	22	64	4.2	S	15	30	4.7	S	20	54	4.2	S	14	43	5	S	22	75	3	S	16	38	5.3	S	19	47	3.3	S	18	40	8.1	S	21	58	3.9
8202	NCOA3	S	19	33	1.5	S	22	36	0.39	S	30	77	9.2	S	31	85	3.5	S	9	12	0.23	S	3	4	0.03	S	10	17	0.31	S	7	9	0.03	S	13	20	0.6	S	7	7	0.07	S	26	56	4.5	S	21	40	1.5
3190	HNRNPK	S	19	46	22.9	S	19	60	10.5	S	17	49	27.5	S	22	77	22.1	S	18	56	37.9	S	18	65	17.2	S	19	49	33.4	S	20	44	13.6	S	17	48	24.6	S	22	62	14.7	S	16	50	28.5	S	23	75	11.8
84678	KDM2B	S	19	32	4.2	S	18	31	0.66	S	21	27	4.7	S	14	28	0.68	S	24	36	4.1	S	15	29	0.77	S	18	27	3.6	S	15	25	0.59	S	17	29	3.9	S	17	28	0.64	S	18	30	3.8	S	12	23	0.68
8473	OGT	S	19	25	1.4	S	18	27	0.37	S	18	22	1.8	S	18	32	0.56	S	16	25	1.4	S	17	24	0.77	S	18	25	1.3	S	19	29	0.28	S	19	26	2.2	S	18	26	0.53	S	22	36	2.9	S	18	21	0.5
2071	ERCC3	S	19	29	6.1	S	14	21	0.52	S	13	34	5.9	S	14	25	1.1	S	19	35	4.3	S	12	19	1.2	S	19	33	5	S	16	24	1.1	S	16	31	5.3	S	11	16	0.84	S	13	35	5.1	S	12	18	0.38
26173	INTS1	S	18	23	0.36	S	32	44	0.26	S	15	22	0.38	S	32	48	0.38	S	13	20	0.38	S	29	37	0.7	S	13	17	0.38	S	30	48	0.27	S	17	23	0.42	S	32	45	0.48	S	18	23	0.47	S	42	62	0.96
3182	HNRNPAB	S	18	73	238	S	25	120	184	S	17	79	305	S	23	122	305	S	17	112	288	S	25	140	256	S	18	105	323	S	25	76	262	S	20	124	261	S	24	133	203	S	18	89	219	S	24	114	165
220988	HNRNPA3	S	18	42	43.8	S	23	54	27.9	S	14	61	55.4	S	23	67	64.4	S	14	73	67.1	S	21	66	52.8	S	16	53	80.3	S	25	60	46.9	S	16	69	77.5	S	20	57	32.1	S	14	56	64.5	S	21	50	29.2
7290	HIRA	S	18	33	8.7	S	21	45	1.4	S	16	31	5.7	S	23	53	3	S	18	44	8.7	S	18	36	3.4	S	17	40	5.8	S	24	56	2.4	S	19	44	10.8	S	17	40	1.8	S	20	38	7	S	15	33	1.7
57592	ZNF687	S	18	33	4	S	17	45	1.6	S	16	46	4.4	S	19	58	2.6	S	20	47	3.6	S	22	60	3.1	S	17	39	3.3	S	16	47	1.7	S	17	40	3.8	S	21	50	2.2	S	19	46	4.8	S	21	54	2.6
4670	HNRNPM	S	18	28	4.5	S	17	31	0.86	S	16	34	3.2	S	17	24	1.2	S	19	37	4.3	S	21	35	1.6	S	23	36	6.7	S	23	32	1.2	S	18	29	4.7	S	17	28	1.1	S	17	26	4.2	S	24	37	1.3
221937	FOXK1	S	18	32	6	S	16	31	1.6	S	18	35	7.5	S	16	27	2.9	S	18	40	7.7	S	18	27	2.6	S	15	27	4.6	S	18	30	2.9	S	20	41	6.4	S	18	32	2	S	22	43	6.8	S	16	26	1.7
51377	UCHL5	S	18	51	30.7	S	15	37	7.8	S	15	48	32.5	S	16	41	12.7	S	15	48	35.6	S	13	34	11.3	S	17	47	38.2	S	18	39	9.7	S	20	62	38.1	S	15	32	7.6	S	16	44	33.5	S	14	30	6.3
7486	WRN	S	18	23	1	S	15	17	0.15	S	15	25	0.97	S	15	22	0.2	S	18	27	1.1	S	13	18	0.32	S	15	23	0.9	S	12	18	0.12	S	18	23	1.4	S	10	18	0.19	S	15	22	1.2	S	15	20	0.23
63977	PRDM15	S	18	23	1.5	S	15	18	0.55	S	12	19	1.8	S	20	29	0.69	S	18	28	1.7	S	17	26	0.87	S	13	18	1.5	S	17	24	0.49	S	13	16	1.9	S	16	21	0.7	S	11	15	1.7	S	16	24	0.75
23126	POGZ	S	18	26	1.8	S	13	16	0.34	S	14	22	2.1	S	13	22	0.7	S	17	26	2	S	10	16	0.43	S	15	26	1.8	S	12	15	0.21	S	16	20	2.3	S	11	15	0.38	S	22	23	2.4	S	10	14	0.47
93973	ACTR8	S	17	39	24.5	S	20	39	5.1	S	16	55	18	S	19	41	6	S	19	61	17	S	17	39	5.6	S	19	54	24.7	S	19	31	6.3	S	17	53	18	S	16	39	5.4	S	13	51	14.9	S	18	30	4.3
84181	CHD6	S	17	24	0.66	S	20	29	0.13	S	13	19	0.19	S	17	25	0.04	S	14	23	0.18	S	18	23	0.09	S	11	19	0.57	S	21	29	0.06	S	13	24	0.16	S	20	27	0.17	S	16	24	0.2	S	24	38	0.1
7515	XRCC1	S	17	53	79.6	S	18	63	34.4	S	19	101	89.2	S	22	60	55.1	S	20	103	80.2	S	25	77	51.8	S	18	68	81.2	S	21	43	47.4	S	18	92	74.4	S	21	68	41.7	S	18	64	73.5	S	25	70	35.7
3178	HNRNPA1	S	17	48	28.4	S	18	66	34.9	S	15	63	76.4	S	20	81	59.1	S	16	57	93.7	S	18	82	49.2	S	21	76	141	S	21	58	52.1	S	20	96	151	S	18	68	17.2	S	17	82	117	S	18	56	32.2
23269	MGA	S	17	23	0.32	S	18	24	0.06	S	15	17	0.46	S	17	20	0.12	S	15	31	0.33	S	21	32	0.4	S	13	19	0.31	S	22	29	0.21	S	11	15	0.3	S	23	32	0.13	S	12	15	0.33	S	29	43	0.19
23186	RCOR1	S	17	46	23.9	S	18	39	5	S	14	35	19.2	S	15	28	3.9	S	14	34	25.4	S	18	33	4.7	S	17	42	21.5	S	17	34	4.9	S	13	30	22.7	S	15	29	4.2	S	15	27	20.2	S	15	34	3
1642	DDB1	S	17	26	1.9	S	17	33	0.35	S	11	16	1.9	S	20	34	0.75	S	12	13	1.3	S	15	25	0.66	S	10	14	1.6	S	20	28	0.28	S	15	19	2.2	S	18	29	0.63	S	16	24	2.6	S	15	23	0.48
3066	HDAC2	S	17	69	94.3	S	15	59	14.9	S	13	94	102	S	16	63	23.2	S	15	116	110	S	13	62	16.6	S	16	90	134	S	18	42	14.2	S	13	96	91.8	S	17	61	16.2	S	14	81	90.3	S	15	57	14.6
29915	HCFC2	S	17	24	4.5	S	12	20	0.4	S	11	33	2.2	S	12	22	0.6	S	17	33	3.4	S	12	22	0.61	S	15	27	2.9	S	12	16	0.59	S	18	36	4.2	S	12	19	0.35	S	12	37	3.1	S	12	16	0.38
8458	TTF2	S	16	21	0.89	S	31	54	1.1	S	13	18	1.2	S	21	39	0.68	S	13	20	0.82	S	23	38	1.3	S	14	21	0.96	S	21	36	0.43	S	13	23	1.1	S	15	27	0.64	S	16	25	1.2	S	37	67	2.5
11284	PNKP	S	16	29	19.6	S	22	48	7.6	S	15	36	28.7	S	21	49	12.3	S	18	48	35.6	S	21	43	13.9	S	18	40	26.3	S	20	35	11.9	S	14	25	16.9	S	16	32	9.4	S	18	36	27.7	S	19	35	7.7
9188	DDX21	S	16	40	6.9	S	21	40	3.5	S	18	33	8.3	S	26	50	5.7	S	21	50	11.3	S	23	53	5.4	S	18	34	10.4	S	23	41	5.1	S	18	31	10.7	S	22	39	3.7	S	20	31	10	S	21	42	3.2
9202	ZMYM4	S	16	32	0.84	S	17	36	0.28	S	12	24	1	S	18	35	0.54	S	12	28	0.84	S	16	32	0.73	S	12	26	0.75	S	18	30	0.32	S	12	29	0.83	S	16	39	0.61	S	14	30	1.2	S	17	36	0.65
3305	HSPA1L	S	16	40	16.6	S	12	38	4	S	14	43	13.9	S	16	37	14.3	S	14	48	14.1	S	16	39	5.9	S	15	38	19.3	S	12	38	5.3	S	15	49	13.6	S	14	38	9	S	16	50	16.6	S	13	38	3.9
23450	SF3B3	S	16	38	1.7	S	11	25	0.24	S	13	25	1.7	S	15	31	0.42	S	12	26	1.3	S	16	23	0.57	S	15	24	1.8	S	13	23	0.2	S	8	12	0.86	S	13	25	0.35	S	9	17	1.4	S	11	27	0.36
9569	GTF2IRD1	S	16	22	2.4	S	8	13	0.11	S	17	19	3.2	S	6	8	0.15	S	18	26	2.8	S	8	10	0.33	S	12	23	1.7	S	7	10	0.17	S	18	29	4	S	6	8	0.2	S	17	26	3.4	S	5	6	0.17
4204	MECP2	S	15	33	26.5	S	24	67	29.2	S	19	61	36.4	S	23	53	43.9	S	17	63	43.3	S	24	61	43.5	S	16	48	45.5	S	23	50	32.9	S	18	53	32.7	S	21	47	28.9	S	16	44	30.3	S	24	56	30.1
10743	RAI1	S	15	22	1.1	S	23	48	0.65	S	14	22	0.77	S	23	41	0.9	S	14	28	0.64	S	24	49	1.3	S	17	25	1.1	S	24	41	0.72	S	14	26	1.2	S	24	41	0.68	S	17	25	1	S	21	40	1.1
1997	ELF1	S	15	65	22	S	13	29	5.7	S	15	71	29.1	S	17	42	10.6	S	15	85	27.6	S	15	37	8.5	S	13	87	30.9	S	16	36	7.6	S	16	78	24.5	S	17	33	5.4	S	15	85	32.2	S	17	36	6.3
10765	KDM5B	S	15	19	0.33	S	13	20	0.24	S	10	14	0.39	S	19	30	0.38	S	13	17	0.38	S	17	24	0.31	S	9	12	0.27	S	14	19	0.1	S	10	12	0.45	S	16	21	0.26	S	12	14	0.38	S	13	21	0.27
7182	NR2C2	S	15	25	5.7	S	12	16	0.72	S	13	24	5.5	S	11	16	0.93	S	16	33	4.3	S	10	17	0.65	S	17	24	9.4	S	17	21	1.2	S	13	24	5	S	12	15	0.63	S	12	19	4.9	S	12	15	0.68
22992	KDM2A	S	15	26	4.7	S	11	26	1.2	S	14	28	6.6	S	11	27	2.2	S	16	33	6.5	S	12	26	2.2	S	13	30	8.1	S	11	23	1.6	S	17	26	5.7	S	10	17	1.5	S	14	24	6.8	S	14	22	1.1
79830	ZMYM1	S	15	19	1	S	8	15	0.2	S	8	9	0.99	S	7	8	0.22	S	9	13	0.91	S	11	14	0.35	S	9	13	0.86	S	7	10	0.09	S	9	13	1.5	S	7	11	0.31	S	9	14	1.5	S	10	14	0.3
3852	KRT5	S	14	24	9.2	S	32	82	17.2	S	13	33	8.5	S	18	37	2.3	S	10	19	3.9	S	21	56	6.2	S	8	12	1.3	S	18	33	3.6	S	6	13	2	S	16	35	2.1	S	16	37	10.6	S	21	49	2.8
25942	SIN3A	S	14	15	1.2	S	23	29	0.4	S	12	15	1.7	S	19	31	0.59	S	11	15	1.2	S	18	27	0.77	S	12	14	1.3	S	18	26	0.32	S	13	17	1.5	S	20	28	0.53	S	21	30	2.5	S	16	22	0.61
9782	MATR3	S	14	29	1.8	S	23	73	5.8	S	11	23	1.9	S	22	58	4.9	S	9	25	1.2	S	25	71	10.3	S	10	27	2.7	S	32	96	11.5	S	10	23	3.6	S	23	54	5.1	S	12	27	2.5	S	29	87	23.1
9031	BAZ1B	S	14	19	0.47	S	19	27	0.26	S	16	17	1	S	21	30	0.44	S	10	11	0.51	S	19	22	0.43	S	9	11	0.37	S	18	26	0.22	S	14	17	0.67	S	15	24	0.3	S	15	24	0.9	S	12	18	0.28
3006	HIST1H1C	S	14	49	82.3	S	16	68	171	S	15	59	204	S	16	63	232	S	14	50	169	S	16	69	214	S	14	42	296	S	16	64	148	S	14	48	214	S	16	69	181	S	15	52	160	S	15	59	141
3008	HIST1H1E	S	14	49	53.7	S	16	61	49.2	S	13	55	16.7	S	16	56	44.6	S	13	48	23.6	S	15	62	81.4	S	12	38	254	S	15	53	76.8	S	15	49	82.7	S	14	59	20.1	S	14	51	32.5	S	14	53	43.7
56980	PRDM10	S	14	30	6.1	S	14	25	1.4	S	16	25	8.4	S	15	27	2.2	S	11	17	4.4	S	17	21	1.9	S	7	17	2.9	S	16	30	1.4	S	14	28	7.9	S	13	19	1.9	S	13	25	4.5	S	15	20	1.9
10664	CTCF	S	14	40	15.1	S	13	44	4.5	S	9	25	16.7	S	9	26	4.3	S	6	15	11.1	S	7	18	2.7	S	9	31	10.2	S	13	35	3.7	S	9	26	15.9	S	7	16	2.4	S	11	28	13.8	S	9	22	2.9
1998	ELF2	S	14	43	9	S	12	23	0.89	S	12	64	9.9	S	14	30	2.3	S	15	64	10	S	12	30	1.7	S	12	41	10.7	S	12	29	1.4	S	12	40	8.4	S	12	22	1.3	S	12	34	9.5	S	11	19	0.83
23598	PATZ1	S	14	31	8.8	S	12	25	1	S	12	32	6.5	S	9	13	1.2	S	10	33	7.9	S	12	16	1.3	S	14	32	8.6	S	11	19	1.6	S	10	25	4.8	S	10	17	0.85	S	10	22	5.5	S	11	15	0.77
284252	KCTD1	S	14	17	3.2	S	8	8	0.22	S	9	11	2.5	S	8	11	0.37	S	10	20	2.2	S	7	11	0.5	S	9	14	2.5	S	7	8	0.13	S	9	14	2.6	S	7	11	0.19	S	10	12	2.7	S	7	9	0.35
9221	NOLC1	S	14	32	3.4	S	7	11	0.7	S	11	19	2.2	S	9	15	0.47	S	10	26	4.9	S	10	17	0.55	S	15	33	4.4	S	7	12	0.34	S	15	33	5.1	S	5	9	0.14	S	10	18	2.2	S	9	12	0.37
5814	PURB	S	13	29	37.4	S	16	36	25.1	S	13	31	41	S	17	46	32.2	S	13	27	31.7	S	19	35	25.2	S	14	32	54.2	S	17	38	22.9	S	13	29	47	S	16	47	22.7	S	16	35	58.9	S	17	40	20.9
5430	POLR2A	S	13	23	0.22	S	16	25	0.12	S	6	7	0.09	S	23	30	0.27	S	6	15	0.16	S	21	26	0.32	S	5	8	0.11	S	15	19	0.14	S	5	9	0.11	S	22	26	0.31	S	7	11	0.17	S	23	30	0.29
3065	HDAC1	S	13	60	49.5	S	15	76	16	S	11	80	36.9	S	17	69	23.7	S	12	112	52.5	S	17	75	28.4	S	13	81	57.5	S	19	41	21.8	S	11	82	47.3	S	15	58	16.7	S	12	86	57.4	S	17	72	15.9
57167	SALL4	S	13	16	1.5	S	14	16	0.45	S	12	16	1.9	S	17	20	0.68	S	15	22	2	S	15	21	0.99	S	11	17	1.1	S	16	23	0.46	S	12	15	1.8	S	13	19	0.41	S	9	12	0.79	S	16	21	0.7
84256	FLYWCH1	S	13	26	6.6	S	13	23	1.1	S	8	21	2.3	S	12	24	1.5	S	8	21	3.6	S	10	23	1.3	S	7	20	3.5	S	13	24	2	S	9	17	2.8	S	12	19	1.2	S	7	12	2	S	10	19	1.2
10445	MCRS1	S	13	27	11.6	S	12	27	2	S	12	31	12.3	S	12	18	3.5	S	10	34	15.1	S	12	22	3.3	S	12	25	15.8	S	12	20	3.5	S	11	31	10.3	S	10	15	1.7	S	12	27	12.1	S	12	25	2.2
11244	ZHX1	S	13	22	2.4	S	10	11	0.27	S	14	17	3.2	S	9	14	0.36	S	13	25	2.3	S	6	8	0.25	S	10	17	2	S	9	11	0.21	S	15	20	3	S	7	9	0.08	S	14	20	3.8	S	8	9	0.16
3096	HIVEP1	S	13	19	0.15	S	5	6	0.02	S	9	15	0.2	S	7	9	0.03	S	9	15	0.19	S	6	7	0.05	S	6	15	0.11	S	6	7	0.02	S	6	12	0.13	S	11	14	0.06	S	9	17	0.14	S	8	9	0.05
3861	KRT14	S	12	24	10.3	S	34	112	20.5	S	10	22	1.2	S	16	37	1.2	S	8	22	1.6	S	18	42	2.1	S	8	22	1.2	S	18	30	1.7	S	7	18	0.24	S	13	25	0.75	S	11	28	1.9	S	17	38	1.4
3856	KRT8	S	12	15	3.1	S	18	37	3.1	S	13	25	5	S	23	38	3.3	S	14	19	5.3	S	23	48	5.8	S	11	12	8	S	22	37	4.2	S	6	8	2.1	S	21	36	2.8	S	11	18	2.9	S	26	53	6.3
3009	HIST1H1B	S	12	27	89.8	S	17	49	100	S	14	45	126	S	16	43	136	S	12	32	107	S	17	48	153	S	13	36	127	S	16	43	122	S	15	41	176	S	16	51	102	S	14	42	134	S	15	49	85.6
9968	MED12	S	12	15	0.18	S	14	25	0.05	S	19	27	0.54	S	26	37	0.42	S	8	10	0.13	S	11	17	0.12	S	8	11	0.16	S	11	20	0.01	S	9	9	0.15	S	12	14	0.06	S	21	28	0.57	S	27	39	0.46
8932	MBD2	S	12	24	20.3	S	14	28	8.8	S	11	28	24.2	S	13	24	11.2	S	11	29	26.8	S	14	29	13	S	10	18	35.4	S	17	30	14.4	S	9	15	24	S	15	30	11.7	S	7	12	21.3	S	16	27	8.6
5931	RBBP7	S	12	38	47.1	S	12	41	13	S	11	50	49.2	S	11	35	13.5	S	12	66	46.6	S	11	34	16.1	S	12	50	65.9	S	11	33	12.6	S	12	60	48.4	S	10	26	8.3	S	11	49	47.1	S	11	25	8.6
4221	MEN1	S	12	18	6.5	S	11	21	0.93	S	11	21	6.6	S	10	16	0.71	S	12	22	7.5	S	8	14	0.91	S	12	22	7.7	S	11	22	0.86	S	10	16	4.5	S	7	10	0.88	S	9	21	4.2	S	8	14	0.62
129831	RBM45	S	12	22	8.2	S	10	16	1.1	S	12	30	7.4	S	13	20	2.4	S	13	30	11.1	S	10	13	1.4	S	13	22	7.8	S	10	15	1.9	S	11	26	6.7	S	9	17	1.2	S	11	19	6.6	S	11	17	0.97
54891	INO80D	S	12	29	4.6	S	10	19	0.76	S	9	18	2	S	9	23	1.1	S	9	20	2.8	S	11	19	0.9	S	6	17	1.8	S	12	22	0.66	S	6	24	3	S	8	19	0.76	S	10	24	4.3	S	9	19	0.99
2965	GTF2H1	S	12	21	2.6	S	9	12	0.46	S	4	10	0.83	S	9	11	0.49	S	9	18	2	S	5	7	0.34	S	7	13	1.4	S	7	10	0.24	S	7	11	0.93	S	6	8	0.34	S	7	10	0.99	S	11	19	0.44
7764	ZNF217	S	12	16	0.46	S	7	16	0.12	S	10	13	0.74	S	8	10	0.1	S	12	17	0.49	S	10	18	0.18	S	8	12	0.3	S	9	16	0.05	S	6	10	0.39	S	11	18	0.14	S	8	10	0.59	S	10	13	0.21
11176	BAZ2A	S	12	18	0.34	S	6	11	0.06	S	5	7	0.11	S	9	12	0.06	S	9	19	0.22	S	8	13	0.13	S	6	7	0.15	S	6	11	0.05	S	11	17	0.27	S	5	7	0.09	S	9	14	0.27	S	7	11	0.1
4998	ORC1	S	12	21	1.1	S	2	5	0.03	S	8	15	1.4	S	2	2	0.04	S	13	18	1.8	S	3	4	0.04	S	9	14	1.1	S	2	4	0.01	S	7	8	1.2	S	2	3	0.02	S	9	13	1.8	S	3	5	0.01
9439	MED23	S	11	12	0.56	S	13	23	0.26	S	14	19	1.7	S	20	35	0.89	S	8	11	0.38	S	14	20	0.28	S	12	14	0.68	S	18	29	0.3	S	14	20	1	S	16	24	0.46	S	17	22	1.6	S	14	24	0.63
54971	BANP	S	11	27	51.6	S	10	24	8.3	S	12	32	93.5	S	8	12	9.1	S	12	36	66.3	S	9	18	9.7	S	12	28	73.3	S	11	18	8.9	S	11	27	40.6	S	10	16	6	S	8	18	44.1	S	9	20	6.4
3607	FOXK2	S	11	14	5.6	S	10	12	0.81	S	10	23	4.4	S	9	11	0.95	S	12	26	5.1	S	9	10	1	S	10	18	3.3	S	10	12	1	S	11	18	6.2	S	10	14	0.78	S	10	17	5.1	S	11	13	1.1
57479	PRR12	S	11	16	0.4	S	10	13	0.11	S	9	9	0.34	S	11	15	0.19	S	7	11	0.4	S	11	12	0.31	S	9	15	0.53	S	8	11	0.06	S	7	8	0.57	S	11	13	0.19	S	10	13	0.54	S	14	18	0.22
9889	ZBED4	S	11	13	0.79	S	10	11	0.16	S	9	13	0.53	S	6	7	0.12	S	9	21	0.57	S	8	8	0.13	S	11	14	0.88	S	8	9	0.09	S	9	18	1.1	S	10	13	0.19	S	13	18	1.5	S	6	10	0.11
466	ATF1	S	11	23	72.4	S	9	16	13.6	S	9	25	97.5	S	8	15	24.8	S	8	19	101	S	8	16	24.6	S	11	24	116	S	8	14	17.3	S	10	23	112	S	8	16	22.6	S	12	34	89.7	S	9	16	13.9
55252	ASXL2	S	11	14	0.64	S	7	12	0.07	S	11	15	0.69	S	12	15	0.17	S	6	9	0.32	S	10	21	0.22	S	9	15	0.48	S	8	15	0.07	S	9	13	0.67	S	10	14	0.07	S	11	14	0.64	S	10	19	0.16
9282	MED14	S	11	15	0.47	S	6	12	0.07	S	10	18	0.69	S	17	35	0.43	S	5	12	0.09	S	14	18	0.26	S	5	10	0.27	S	10	12	0.04	S	11	14	0.68	S	10	16	0.19	S	11	14	0.86	S	9	18	0.28
23394	ADNP	S	10	13	0.33	S	26	49	0.68	S	13	14	0.43	S	22	38	1	S	7	11	0.29	S	19	31	1.1	S	8	10	0.39	S	23	39	0.55	S	9	10	0.46	S	17	36	0.83	S	11	17	0.45	S	21	35	0.83
283489	CHAMP1	S	10	11	0.79	S	18	23	0.48	S	14	17	1.8	S	17	25	0.42	S	10	16	1.3	S	15	20	0.42	S	5	8	0.37	S	18	23	0.3	S	11	12	1.8	S	13	19	0.23	S	9	10	1.7	S	14	16	0.56
9726	ZNF646	S	10	18	0.43	S	15	25	0.27	S	9	14	0.53	S	14	20	0.32	S	10	13	0.45	S	16	20	0.49	S	7	9	0.29	S	12	16	0.19	S	10	15	0.46	S	14	18	0.32	S	10	15	0.45	S	17	24	0.5
3875	KRT18	S	10	14	11	S	14	23	2	S	8	10	3.1	S	11	17	2.4	S	7	9	3.4	S	17	28	5.6	S	8	12	4	S	15	21	2.7	S	9	12	3.4	S	14	20	2.2	S	6	9	1.1	S	17	22	4.1
5469	MED1	S	10	12	0.22	S	13	20	0.13	S	13	19	0.8	S	27	48	0.57	S	9	13	0.2	S	13	16	0.26	S	9	11	0.31	S	14	21	0.08	S	7	10	0.16	S	11	12	0.17	S	11	26	0.63	S	18	25	0.39
5887	RAD23B	S	10	21	21.7	S	12	25	13	S	10	23	20.6	S	12	25	15.8	S	10	21	22	S	11	27	14.2	S	9	19	23.3	S	11	31	11.7	S	10	19	16.8	S	11	27	11.1	S	12	22	19.1	S	12	26	10.5
5928	RBBP4	S	10	35	139	S	11	38	33.4	S	14	82	160	S	11	42	41.2	S	13	89	196	S	10	37	43.9	S	13	60	207	S	12	33	35.4	S	12	72	153	S	11	29	19.7	S	12	55	157	S	11	29	22.9
3726	JUNB	S	10	20	7.1	S	9	17	3.3	S	11	19	7.6	S	9	17	6	S	8	24	8.1	S	9	15	5.3	S	10	26	11.4	S	10	20	4.8	S	9	19	8.6	S	10	16	4.8	S	7	14	5.9	S	9	17	3
4150	MAZ	S	10	38	25.2	S	9	22	5	S	10	34	25.1	S	7	42	5.9	S	10	41	26.5	S	5	26	3.4	S	11	43	28.7	S	9	29	5.7	S	10	53	21.3	S	6	35	3.4	S	10	53	15.2	S	8	32	3.9
7709	ZBTB17	S	10	14	1.7	S	9	20	0.96	S	7	12	3.2	S	8	20	1.1	S	9	13	3.1	S	9	16	1.6	S	10	18	2.2	S	10	18	1	S	7	12	3.3	S	8	18	0.97	S	7	15	2.3	S	7	18	0.76
5929	RBBP5	S	10	20	8.6	S	8	14	1.3	S	10	23	8.2	S	10	12	2.2	S	9	22	8.7	S	10	17	3.1	S	13	28	16.1	S	11	21	2.1	S	12	22	10.1	S	9	13	2	S	10	18	8.8	S	11	20	2
11168	PSIP1	S	10	16	4.5	S	8	15	1.1	S	7	19	4.4	S	7	15	1	S	14	32	7.8	S	7	12	1.1	S	12	23	10.8	S	9	14	1.4	S	12	23	8	S	7	12	0.9	S	9	22	6.6	S	8	12	0.67
23051	ZHX3	S	10	19	0.81	S	7	11	0.04	S	8	15	0.82	S	8	9	0.06	S	8	13	0.82	S	5	7	0.06	S	7	15	0.85	S	4	4	0	S	10	18	1.5	S	1	1	0.02	S	9	18	1.8	S	3	4	0.02
64919	BCL11B	S	10	17	1.8	S	7	10	0.23	S	8	13	1.8	S	6	10	0.38	S	7	18	1.1	S	7	15	0.51	S	7	18	1.6	S	8	16	0.13	S	9	18	2.5	S	5	12	0.33	S	7	14	2.1	S	6	11	0.38
80010	RMI1	S	9	27	10.7	S	14	35	2.4	S	11	65	12.3	S	11	24	3.8	S	12	61	11.6	S	13	25	3.2	S	13	54	15.8	S	13	23	3	S	7	41	10.3	S	11	23	2.6	S	8	39	11.3	S	11	29	2
3183	HNRNPC	S	9	15	17.2	S	13	32	24.4	S	8	20	19	S	14	30	24	S	9	17	18.2	S	11	32	30.4	S	8	14	18.9	S	13	29	20.9	S	8	20	20	S	14	29	23.9	S	8	18	16.2	S	12	27	13.5
7799	PRDM2	S	9	11	0.41	S	13	21	0.19	S	6	13	0.52	S	14	24	0.48	S	6	11	0.36	S	14	21	0.71	S	4	8	0.34	S	12	18	0.2	S	7	12	0.52	S	15	21	0.42	S	9	10	0.63	S	18	23	0.58
9611	NCOR1	S	9	14	0.15	S	13	19	0.04	S	5	8	0.08	S	11	11	0.03	S	7	9	0.16	S	14	19	0.09	S	10	15	0.25	S	10	13	0.02	S	6	12	0.14	S	21	29	0.11	S	5	11	0.1	S	24	34	0.22
55734	ZFP64	S	9	17	10.9	S	12	21	1.5	S	9	25	10.1	S	9	16	2.2	S	8	15	7	S	8	17	2.2	S	10	24	11	S	9	18	4	S	7	18	9.6	S	11	20	1.8	S	7	17	9.5	S	11	16	2.4
4350	MPG	S	9	20	12.3	S	11	23	2.8	S	9	35	11.6	S	9	14	4.4	S	10	34	14.6	S	9	14	5	S	10	21	15.3	S	10	17	3.6	S	9	27	12.5	S	7	15	2	S	10	28	16.8	S	10	15	2.4
86	ACTL6A	S	9	18	27.1	S	10	17	6.2	S	10	33	29.4	S	8	20	9.9	S	8	39	30.6	S	9	21	9.6	S	9	24	47.5	S	9	16	7.4	S	9	21	28.3	S	9	23	7.6	S	9	20	26.8	S	9	20	4.8
5985	RFC5	S	9	22	4.6	S	10	32	1.5	S	9	40	3.7	S	12	26	2.9	S	8	50	3.9	S	11	30	3.4	S	10	31	4.9	S	12	26	3.3	S	8	23	4.5	S	10	29	1.7	S	8	28	3.7	S	11	21	2.3
7014	TERF2	S	9	15	3.6	S	9	17	0.61	S	9	28	4.1	S	10	16	0.74	S	10	31	5.2	S	11	17	0.9	S	11	18	7.6	S	13	17	0.93	S	10	17	3.4	S	6	10	0.46	S	12	15	5.5	S	8	11	0.42
6749	SSRP1	S	9	10	2.7	S	9	16	1	S	5	9	4.8	S	15	29	2.6	S	7	17	4.7	S	12	25	2	S	9	18	4	S	18	27	2.8	S	6	8	2.1	S	10	16	1.5	S	12	29	8	S	14	25	1.6
51043	ZBTB7B	S	9	33	60.6	S	8	34	9.7	S	9	39	71.8	S	9	35	19	S	10	50	70.2	S	11	36	12.8	S	10	48	58.8	S	8	22	17.1	S	10	43	47.5	S	10	30	13.4	S	10	44	54.8	S	10	30	10.8
283899	INO80E	S	9	23	32.7	S	7	19	6	S	7	18	27.7	S	8	23	12.2	S	8	21	29.7	S	8	23	10.9	S	8	27	46.7	S	8	22	9.1	S	10	23	41.3	S	8	16	9.3	S	6	20	32.8	S	7	16	5.7
23435	TARDBP	S	9	20	14.8	S	7	11	3.5	S	7	20	18.2	S	3	7	4	S	6	30	18	S	6	9	3.4	S	6	19	16.7	S	8	12	3.7	S	6	19	14.7	S	5	9	3.4	S	8	29	18.6	S	6	10	2.4
23133	PHF8	S	9	9	0.48	S	4	7	0.03	S	5	8	0.43	S	6	11	0.06	S	5	10	1.8	S	6	9	0.13	S	6	7	0.43	S	5	10	0.01	S	7	9	0.61	S	9	11	0.07	S	7	9	0.61	S	6	11	0.09
1832	DSP	S	8	9	0.1	S	27	48	0.21	S	5	8	0.14	S	12	22	0.05	S	3	4	0.04	S	25	33	0.19	S	8	11	0.2	S	14	25	0.07	S	7	7	0.11	S	13	15	0.09	S	12	24	0.56	S	48	69	0.47
50809	HP1BP3	S	8	11	2.2	S	19	26	4.4	S	10	14	2.4	S	19	30	5.9	S	9	15	3.5	S	16	34	5.5	S	10	12	3.5	S	22	32	6.1	S	10	11	3.2	S	15	32	4.3	S	8	13	2.7	S	17	25	3.7
5927	KDM5A	S	8	9	0.3	S	14	18	0.56	S	9	17	2.4	S	12	20	0.87	S	10	16	0.36	S	14	21	1	S	9	13	0.24	S	12	21	0.55	S	7	10	0.29	S	14	21	0.93	S	8	14	2.1	S	13	14	0.22
23196	FAM120A	S	8	10	0.14	S	14	25	0.29	S	5	5	0.22	S	10	20	0.3	S	6	6	0.12	S	8	13	0.31	S	6	11	0.2	S	12	20	0.18	S	5	10	0.23	S	10	18	0.33	S	5	10	0.23	S	13	17	0.63
10432	RBM14	S	8	12	7.7	S	13	23	4.2	S	9	11	5.2	S	17	29	8.3	S	9	16	9.1	S	14	27	7.8	S	9	15	10.3	S	15	20	6	S	7	10	8.3	S	13	21	5.7	S	8	11	7.5	S	12	25	5.3
10363	HMG20A	S	8	18	7.1	S	13	20	5	S	7	12	5.4	S	10	20	6.6	S	7	15	6.3	S	10	29	7.5	S	10	14	10.7	S	11	17	3.9	S	6	12	7.9	S	9	22	6.2	S	4	8	6.6	S	10	24	4
6874	TAF4	S	8	12	0.47	S	10	14	0.33	S	7	10	2	S	12	18	0.63	S	9	26	0.6	S	12	16	0.51	S	10	19	2.1	S	11	13	0.47	S	12	22	1.7	S	14	17	0.53	S	10	16	1.2	S	10	17	0.37
10111	RAD50	S	8	12	0.23	S	9	10	0.11	S	7	9	0.23	S	10	13	0.1	S	6	8	0.16	S	13	15	0.18	S	3	4	0.09	S	11	18	0.08	S	5	8	0.27	S	10	12	0.12	S	4	6	0.14	S	11	16	0.14
84916	CIRH1A	S	8	13	1.9	S	9	15	0.53	S	6	14	1.6	S	5	10	0.16	S	11	18	2.2	S	6	8	0.6	S	8	11	2.6	S	9	12	0.74	S	8	18	0.93	S	7	12	0.51	S	4	10	0.77	S	4	9	0.27
9425	CDYL	S	8	14	4.7	S	9	17	0.91	S	5	13	3.1	S	7	17	1.3	S	7	15	5.2	S	6	11	1	S	9	14	5.9	S	8	17	1.2	S	7	15	4.4	S	7	23	1	S	5	20	2.5	S	8	14	0.62
11100	HNRNPUL1	S	8	16	2.5	S	8	15	0.72	S	8	20	2.2	S	9	19	1	S	9	17	1.9	S	11	26	1.1	S	10	16	2.1	S	12	22	1.3	S	12	18	3.6	S	9	19	1.1	S	8	15	1.8	S	12	26	1.3
7023	TFAP4	S	8	14	6.5	S	8	11	1.1	S	7	15	7.7	S	9	13	1.9	S	8	24	8.7	S	7	10	0.99	S	9	21	10.9	S	9	15	1.3	S	9	30	10.1	S	8	11	0.93	S	6	22	8.1	S	11	12	1.4
5982	RFC2	S	8	13	4.8	S	8	14	1.6	S	6	17	5.5	S	9	16	2.5	S	8	20	5.9	S	10	15	5.7	S	7	17	5.6	S	11	19	2.7	S	6	14	5.8	S	9	13	1.5	S	4	16	4.6	S	9	16	1.3
3185	HNRNPF	S	8	15	5.3	S	8	19	2	S	5	21	5	S	8	20	3.4	S	6	19	7	S	7	18	3.4	S	6	21	9.6	S	10	23	4.1	S	6	23	3.1	S	8	14	2.4	S	8	11	4.5	S	9	23	4.7
1386	ATF2	S	8	13	3.3	S	7	18	0.8	S	6	18	2.9	S	6	9	1.1	S	6	16	2.9	S	5	6	0.8	S	8	19	5.1	S	7	9	1.1	S	7	12	2.3	S	4	6	0.41	S	5	10	2.2	S	6	9	0.56
9575	CLOCK	S	8	12	0.6	S	7	7	0.13	S	5	6	0.64	S	6	9	0.2	S	6	8	0.89	S	5	6	0.21	S	5	6	0.69	S	6	9	0.19	S	3	4	0.51	S	4	4	0.1	S	4	5	0.6	S	2	3	0.07
1022	CDK7	S	8	20	6.1	S	6	8	0.86	S	10	19	8.4	S	8	12	2.1	S	8	20	7.1	S	8	11	1.8	S	8	24	9.6	S	8	9	1.6	S	9	21	8.2	S	6	6	1.4	S	7	22	8.5	S	7	11	1.3
116092	DNTTIP1	S	8	14	5.2	S	6	14	1	S	8	15	4.8	S	8	14	1.4	S	8	16	4.9	S	7	16	1.9	S	5	14	3	S	12	17	1.3	S	8	20	6.2	S	5	17	0.82	S	5	16	4.6	S	8	16	0.85
11016	ATF7	S	8	29	9.5	S	6	19	1	S	7	26	9.6	S	7	15	1.4	S	8	37	11.4	S	6	15	1.5	S	9	33	15.6	S	9	23	1.9	S	6	23	9.1	S	5	12	1	S	11	35	11.4	S	7	12	1.1
2976	GTF3C2	S	8	12	0.45	S	6	10	0.18	S	7	7	0.73	S	4	5	0.26	S	7	12	0.85	S	9	19	0.53	S	6	7	0.74	S	5	5	0.09	S	8	10	0.99	S	3	5	0.26	S	7	8	0.37	S	5	9	0.33
125476	INO80C	S	8	23	27.3	S	6	9	3.7	S	6	18	37.8	S	7	21	7.9	S	9	28	38.6	S	7	14	5.8	S	8	24	38.6	S	9	17	7.6	S	9	22	35.5	S	7	13	6.9	S	9	19	39.7	S	6	13	3.3
116028	RMI2	S	8	15	19.2	S	5	10	2.2	S	5	11	17.6	S	5	7	2.8	S	6	14	24.5	S	6	9	2.4	S	5	12	29.6	S	6	10	3.2	S	7	15	22.4	S	4	7	1.7	S	6	10	20.5	S	5	9	1.6
8815	BANF1	S	8	51	309	S	3	7	4.8	S	7	87	511	S	4	13	11.8	S	7	85	545	S	5	9	5.8	S	9	97	837	S	9	13	9.7	S	9	108	509	S	4	8	6.8	S	8	61	327	S	2	8	4.5
4000	LMNA	S	8	10	1.3	S	3	5	0.02	S	7	12	0.61	S	3	3	0.06	S	8	13	1.8	S	4	4	0.07	S	10	13	1.9	S	4	4	0.09	S	9	11	1.3	S	1	1	0.02	S	4	7	0.81	S	5	5	0.14
54107	POLE3	S	8	22	58	S	3	7	1.8	S	6	25	67.5	S	3	6	4	S	5	23	61.5	S	3	6	3.9	S	7	20	86.4	S	4	9	2.8	S	5	16	68.8	S	3	7	3.2	S	4	15	63.4	S	4	8	0.95
3981	LIG4	S	8	19	0.37	S	3	7	0.05	S	5	9	0.63	S	4	7	0.07	S	5	7	0.35	S	3	5	0.06	S	4	7	0.3	S	2	6	0.03	S	7	12	0.67	S	2	4	0.02	S	7	11	0.55	S	1	2	0.03
83990	BRIP1	S	7	9	0.25	S	17	31	0.16	S	2	2	0.05	S	19	36	0.48	S	3	4	0.03	S	16	33	0.64	S	9	12	0.33	S	17	22	0.21	S	7	7	0.2	S	16	23	0.26	S	4	4	0.07	S	20	38	0.47
3309	HSPA5	S	7	14	0.59	S	12	20	0.93	S	4	6	0.22	S	14	22	1.2	S	8	12	1.4	S	12	17	0.89	S	5	8	0.64	S	16	29	1.2	S	6	13	0.27	S	12	15	0.74	S	7	12	0.79	S	11	16	1
5984	RFC4	S	7	11	6.7	S	11	18	1.9	S	7	12	11.8	S	8	16	3.1	S	8	11	8.5	S	10	21	3.4	S	8	17	9.8	S	12	16	7.8	S	9	17	11.6	S	11	17	3.1	S	7	15	6.8	S	8	19	1.9
6118	RPA2	S	7	24	28.1	S	10	35	31.3	S	9	25	34.7	S	7	30	23.8	S	7	19	38.8	S	11	35	27	S	7	20	43.6	S	8	26	21.9	S	7	23	26.7	S	10	32	27.3	S	5	22	17	S	11	34	24.5
11187	PKP3	S	7	14	0.54	S	10	17	0.2	S	8	14	0.54	S	9	15	0.25	S	7	17	0.35	S	9	17	0.26	S	7	9	0.16	S	13	25	0.29	S	5	8	0.26	S	6	11	0.11	S	6	8	0.44	S	10	15	0.19
9070	ASH2L	S	7	15	3.1	S	10	13	0.83	S	5	20	5.1	S	9	17	1.1	S	7	17	4	S	8	14	1.8	S	7	25	1.6	S	8	10	0.99	S	5	17	2.6	S	7	10	0.79	S	7	13	4	S	10	13	0.83
54840	APTX	S	7	14	8.2	S	9	26	4.7	S	8	27	17.6	S	12	33	8.3	S	6	24	12.6	S	10	32	9.6	S	6	11	13	S	10	21	10.3	S	7	12	14.1	S	11	28	7.3	S	9	16	11.6	S	11	25	5.6
171017	ZNF384	S	7	13	11.3	S	9	19	6.1	S	5	11	7.1	S	7	15	8.3	S	5	17	8.9	S	10	21	7.8	S	4	12	11.4	S	8	16	7.7	S	5	13	8.7	S	7	13	6	S	4	16	7.6	S	9	18	6.4
6878	TAF6	S	7	10	0.92	S	9	12	0.3	S	2	4	0.28	S	6	9	0.54	S	4	9	0.63	S	8	13	0.48	S	2	8	0.46	S	12	17	0.73	S	2	6	0.36	S	9	12	0.4	S	2	2	0.38	S	6	9	0.2
54386	TERF2IP	S	7	15	3.6	S	8	12	0.7	S	10	28	5	S	7	8	0.83	S	11	32	4.7	S	4	5	0.8	S	9	20	5.2	S	8	11	0.77	S	7	16	3.5	S	7	8	0.42	S	8	14	5	S	5	8	0.45
6877	TAF5	S	7	9	0.26	S	8	10	0.22	S	5	7	0.25	S	5	9	0.35	S	6	11	0.47	S	7	9	0.17	S	5	6	0.12	S	8	10	0.29	S	7	8	0.42	S	6	9	0.27	S	5	7	0.44	S	3	4	0.17
2968	GTF2H4	S	7	12	5.6	S	7	11	0.72	S	8	19	8	S	9	11	3	S	7	20	7.1	S	7	12	3.2	S	10	22	12.9	S	8	19	1.5	S	7	18	6.9	S	5	7	0.99	S	6	13	4.9	S	5	10	0.98
7003	TEAD1	S	7	9	2.3	S	7	12	0.38	S	8	12	4.7	S	8	11	0.53	S	4	12	1.7	S	6	9	0.67	S	9	14	3.5	S	8	13	1.4	S	8	12	2.6	S	7	9	0.14	S	6	12	2.1	S	7	11	0.3
10949	HNRNPA0	S	7	15	10.9	S	7	18	7.2	S	6	13	12.6	S	10	22	11.4	S	7	27	14.5	S	7	20	9.7	S	9	22	24.1	S	11	22	11.3	S	11	34	21.8	S	9	27	10.7	S	9	22	17.3	S	9	24	6.8
9640	ZNF592	S	7	9	0.37	S	7	7	0.06	S	6	9	0.48	S	8	11	0.27	S	5	8	0.21	S	6	8	0.24	S	4	6	0.12	S	6	9	0.07	S	4	5	0.38	S	7	10	0.16	S	6	10	0.47	S	8	13	0.27
11091	WDR5	S	7	14	9.5	S	7	15	2.8	S	6	14	8.3	S	6	11	3.8	S	7	21	8.9	S	7	12	3.7	S	5	16	7.9	S	7	12	3.8	S	6	17	10	S	5	9	2.5	S	6	14	8.1	S	6	11	2.3
166815	TIGD2	S	7	10	1.3	S	7	12	0.53	S	4	7	0.62	S	4	6	0.41	S	4	12	0.87	S	7	12	0.6	S	4	7	1.3	S	7	15	0.6	S	3	7	0.5	S	4	7	0.22	S	3	8	0.8	S	6	9	0.34
4802	NFYC	S	7	16	39.1	S	6	9	3.5	S	8	14	55.4	S	4	4	5.8	S	6	16	52.3	S	4	5	2.8	S	7	14	57.7	S	7	12	5	S	7	10	44.8	S	4	6	2.6	S	6	14	57.6	S	4	5	3.2
23160	WDR43	S	7	13	2.5	S	6	8	0.6	S	7	8	2.3	S	6	7	0.48	S	5	6	2	S	4	4	0.39	S	7	10	2.3	S	8	17	0.77	S	6	7	1.4	S	3	3	0.22	S	7	10	0.71	S	4	4	0.2
53615	MBD3	S	7	13	6.4	S	6	10	1	S	5	14	3.3	S	5	14	1.9	S	4	11	4	S	4	7	1.8	S	6	16	3.8	S	8	12	3	S	8	25	9.9	S	7	9	2.1	S	7	15	5.4	S	7	12	1.6
1390	CREM	S	7	20	22.9	S	5	17	5.5	S	5	46	32.5	S	6	14	9.6	S	6	41	27.8	S	6	19	7.5	S	6	25	56.9	S	7	14	6	S	5	31	60.8	S	5	15	7.2	S	7	36	43.5	S	6	14	2.9
1643	DDB2	S	7	9	1.7	S	5	7	0.29	S	5	9	1.8	S	5	7	0.56	S	4	5	1.6	S	3	4	0.24	S	4	5	1.7	S	8	11	0.59	S	4	4	1.3	S	5	5	0.23	S	4	6	1.6	S	3	4	0.14
902	CCNH	S	7	9	4.3	S	4	5	0.49	S	3	7	1.2	S	4	5	0.8	S	4	7	2.1	S	4	5	0.57	S	6	10	4.7	S	6	7	0.94	S	6	11	3.5	S	2	2	0.13	S	6	14	3.3	S	3	4	0.36
23309	SIN3B	S	7	10	0.18	S	4	4	0.04	S	2	3	0.02	S	5	7	0.05	S	5	6	0.15	S	6	9	0.1	S	5	5	0.12	S	3	3	0.03	S	4	4	0.15	S	7	12	0.08	S	4	7	0.09	S	5	6	0.05
1655	DDX5	S	6	9	3.5	S	16	21	1.9	S	9	13	4.8	S	15	21	2.5	S	9	15	5.3	S	19	23	3	S	9	16	5.5	S	20	29	3.3	S	7	14	3.3	S	16	22	2	S	7	10	2.5	S	20	30	3.2
5431	POLR2B	S	6	8	0.09	S	16	23	0.22	S	5	5	0.15	S	19	23	0.27	S	2	2	0.04	S	18	23	0.42	S	4	4	0.09	S	16	23	0.11	S	5	7	0.22	S	12	15	0.28	S	5	5	0.17	S	17	24	0.45
55775	TDP1	S	6	10	1.6	S	12	22	0.6	S	5	11	1.8	S	8	17	0.71	S	4	11	1.2	S	12	24	0.94	S	5	7	1.4	S	15	20	1	S	2	2	0.34	S	5	13	0.72	S	3	6	0.52	S	10	15	0.36
10038	PARP2	S	6	20	2.5	S	9	21	1.1	S	5	33	2.7	S	8	25	1.2	S	4	28	2.4	S	8	30	1.1	S	4	12	2.5	S	6	14	1.1	S	4	9	2.2	S	6	12	0.27	S	5	6	1	S	5	12	0.54
10923	SUB1	S	6	10	16	S	9	18	7.1	S	4	7	20.6	S	7	11	11.2	S	6	8	26.1	S	6	9	7.3	S	6	12	42.6	S	6	10	5.3	S	5	8	19	S	3	4	1.7	S	5	11	14.2	S	5	9	4
10155	TRIM28	S	6	8	0.15	S	9	14	0.16	S	4	9	0.24	S	7	16	0.15	S	5	11	0.54	S	11	14	0.62	S	5	8	0.29	S	10	18	0.16	S	4	8	0.36	S	7	10	0.2	S	6	9	0.3	S	8	18	0.43
23013	SPEN	S	6	8	0.07	S	9	11	0.02	S	3	4	0.06	S	6	6	0.009	S	7	8	0.09	S	10	11	0.04	S	4	6	0.05	S	6	10	0.01	S	6	8	0.05	S	10	10	0.04	S	5	6	0.05	S	14	19	0.06
10236	HNRNPR	S	6	11	0.97	S	9	14	1.2	S	2	4	0.77	S	10	19	2	S	2	5	0.81	S	11	23	2.6	S	2	2	1.6	S	12	18	2.8	S	2	7	0.64	S	10	21	2.1	S	1	2	0.49	S	11	18	1.6
1069	CETN2	S	6	17	11.9	S	8	17	2.8	S	6	16	4.4	S	6	12	2.3	S	6	16	8.8	S	5	11	0.69	S	6	21	15	S	7	14	1.4	S	6	22	12.9	S	7	15	1.5	S	4	11	7.1	S	6	13	1.2
25926	NOL11	S	6	8	1.9	S	8	14	0.47	S	6	14	1.2	S	5	9	0.48	S	5	11	0.86	S	3	4	0.2	S	5	11	1.6	S	6	8	0.54	S	3	12	0.81	S	4	7	0.37	S	5	8	1.6	S	10	14	0.54
221092	HNRNPUL2	S	6	7	0.2	S	8	14	0.28	S	4	6	0.41	S	7	14	0.38	S	5	7	0.28	S	5	10	0.36	S	3	5	0.25	S	5	9	0.23	S	3	5	0.31	S	4	9	0.29	S	3	3	0.17	S	5	12	0.38
1385	CREB1	S	6	17	168	S	6	15	49.6	S	7	22	202	S	7	15	81.2	S	6	19	235	S	7	20	74.5	S	8	24	271	S	6	11	64.2	S	7	25	123	S	7	15	35.4	S	7	27	198	S	7	14	50.9
57659	ZBTB4	S	6	7	0.6	S	6	8	0.21	S	5	6	0.46	S	7	8	0.3	S	4	6	0.21	S	7	8	0.39	S	5	8	0.39	S	7	10	0.12	S	7	8	0.47	S	5	7	0.21	S	5	5	0.46	S	6	8	0.42
221656	KDM1B	S	6	13	2	S	6	7	0.28	S	5	7	0.79	S	4	4	0.38	S	9	12	1.2	S	4	8	0.26	S	7	12	1.6	S	5	6	0.38	S	10	15	2	S	4	7	0.11	S	4	5	0.5	S	6	8	0.19
57332	CBX8	S	6	6	2.5	S	6	6	0.33	S	5	10	2.5	S	4	8	0.4	S	5	8	2.3	S	6	10	0.5	S	6	8	3.2	S	6	6	0.67	S	7	7	2.9	S	4	6	0.46	S	2	3	1.5	S	6	7	0.58
84135	UTP15	S	6	11	0.75	S	6	12	0.44	S	4	8	1.2	S	8	12	0.56	S	6	14	1.8	S	7	9	0.32	S	8	10	2.1	S	8	15	0.62	S	6	14	1.1	S	4	6	0.37	S	4	12	1.2	S	4	7	0.2
26009	ZZZ3	S	6	8	0.28	S	5	7	0.08	S	5	5	0.4	S	5	8	0.13	S	6	8	0.54	S	5	6	0.23	S	7	9	0.67	S	4	6	0.02	S	5	9	0.22	S	4	9	0.15	S	6	8	0.52	S	6	7	0.19
100128927	ZBTB42	S	6	9	1.3	S	5	6	0.39	S	4	7	1.5	S	5	7	0.62	S	4	10	1.9	S	4	5	0.4	S	4	9	2.1	S	5	7	0.44	S	4	8	1.4	S	4	6	0.36	S	4	6	1.2	S	4	7	0.35
23054	NCOA6	S	6	9	0.31	S	3	4	0.02	S	5	6	0.46	S	7	11	0.16	S	3	4	0.07	S	3	3	0.04	S	6	6	0.25	S	1	1	0.02	S	4	4	0.14	S	4	7	0.04	S	6	8	0.53	S	5	9	0.14
1871	E2F3	S	6	8	6.8	S	3	3	0.66	S	5	9	8.3	S	5	6	1.4	S	5	10	9.1	S	5	6	1.3	S	8	11	10.6	S	8	14	0.55	S	7	8	8.1	S	4	5	0.81	S	5	7	7.8	S	5	6	0.85
80012	PHC3	S	6	6	0.65	S	3	7	0.15	S	4	7	0.6	S	7	11	0.14	S	8	11	2.4	S	8	11	0.46	S	3	7	0.45	S	6	9	0.17	S	5	11	1.6	S	5	10	0.26	S	5	11	0.9	S	5	9	0.17
146050	ZSCAN29	S	6	8	0.54	S	2	3	0.04	S	6	9	0.66	S	3	3	0.09	S	4	6	0.6	S	2	2	0.03	S	4	4	0.7	S	2	2	0.04	S	6	7	0.75	S	1	1	0.02	S	3	4	0.62	S	1	3	0.04
3880	KRT19	S	5	6	9.8	S	17	27	0.36	S	8	14	0.67	S	15	20	0.75	S	6	9	0.37	S	15	32	3.4	S	9	14	1.6	S	14	24	1.9	S	7	11	0.95	S	14	25	0.75	S	9	18	5.2	S	15	23	1.1
7019	TFAM	S	5	10	4.8	S	14	27	8.6	S	3	6	4.1	S	14	26	15.7	S	4	7	4.7	S	13	26	13.3	S	5	11	5.9	S	13	19	13.1	S	6	18	7	S	11	22	9.8	S	3	11	4.5	S	14	23	6.8
57805	CCAR2	S	5	10	0.1	S	8	10	0.14	S	2	4	0.06	S	9	14	0.18	S	5	8	0.09	S	8	13	0.23	S	3	5	0.11	S	11	14	0.2	S	6	8	0.26	S	9	14	0.2	S	4	7	0.12	S	11	14	0.48
60686	C14orf93	S	5	6	3.7	S	7	11	1.6	S	5	9	4.9	S	10	14	4.1	S	5	7	4.3	S	11	13	2.3	S	6	10	5.6	S	8	11	4	S	4	7	3.6	S	6	10	1.8	S	4	9	3.4	S	7	8	11.2
4904	YBX1	S	5	7	2.6	S	7	13	0.95	S	5	12	4	S	8	13	1.9	S	6	16	3.1	S	6	9	1.3	S	4	14	8.5	S	10	20	1.6	S	7	14	4.1	S	7	10	0.77	S	4	6	0.36	S	8	16	1
3727	JUND	S	5	12	6.2	S	7	14	1.6	S	5	12	10.5	S	5	8	2.5	S	4	9	9.5	S	5	9	1.5	S	5	12	11.7	S	5	8	2.3	S	3	9	8.9	S	6	8	1.6	S	7	18	14.9	S	7	11	0.62
83444	INO80B	S	5	6	5.2	S	7	10	1.5	S	3	10	2.4	S	5	7	1.4	S	5	7	4.7	S	5	6	1.8	S	5	12	5	S	6	7	1.8	S	4	7	3.9	S	3	3	0.85	S	2	3	3	S	6	8	1
51341	ZBTB7A	S	5	13	9.5	S	6	13	1.3	S	7	10	7.3	S	5	10	1.3	S	8	17	11.9	S	5	7	0.96	S	8	17	20.4	S	6	14	1	S	6	14	15.1	S	5	10	0.67	S	6	14	20	S	4	10	1.3
84146	ZNF644	S	5	6	0.28	S	6	10	0.06	S	6	9	0.27	S	8	10	0.08	S	4	8	0.17	S	6	6	0.12	S	3	4	0.15	S	5	7	0.03	S	5	6	0.31	S	7	11	0.09	S	4	4	0.13	S	6	8	0.14
6934	TCF7L2	S	5	12	4.5	S	6	11	0.67	S	4	7	3.6	S	5	7	1	S	5	9	3.7	S	4	6	0.85	S	7	13	5.6	S	5	8	0.84	S	5	12	3	S	5	8	0.57	S	5	8	3.6	S	5	7	0.46
7181	NR2C1	S	5	9	1.3	S	5	7	0.04	S	7	13	1.5	S	4	5	0.22	S	6	17	1.2	S	5	6	0.23	S	5	9	1	S	5	7	0.23	S	4	7	0.16	S	2	2	0.06	S	3	4	0.42	S	3	4	0.07
1059	CENPB	S	5	14	4.9	S	5	6	0.48	S	6	20	6.1	S	6	10	1.5	S	4	17	5.8	S	6	11	1.2	S	4	7	4.2	S	5	9	0.84	S	5	11	3.3	S	6	9	0.65	S	4	10	3.7	S	5	8	0.6
10189	ALYREF	S	5	17	2.6	S	5	13	0.22	S	5	34	4.6	S	4	11	0.77	S	3	38	4.4	S	3	10	0.3	S	5	31	11.7	S	4	10	0.5	S	5	23	4.5	S	3	4	0.02	S	3	20	5.1	S	5	8	0.23
6015	RING1	S	5	10	3.8	S	4	6	1.3	S	7	23	3.7	S	5	8	2	S	5	18	4.5	S	4	14	2.4	S	6	21	6.4	S	7	10	2.2	S	5	18	4.1	S	4	7	0.86	S	4	10	3.1	S	3	5	0.51
6119	RPA3	S	5	15	57.3	S	4	12	11.1	S	5	15	70.8	S	4	13	11.6	S	5	24	57	S	4	15	12.8	S	4	20	107	S	3	6	11.6	S	3	20	67.5	S	4	8	11.2	S	3	17	51.3	S	4	7	6.3
27097	TAF5L	S	5	5	1.4	S	4	6	0.1	S	4	5	1.2	S	5	5	0.6	S	5	8	1.9	S	5	6	0.47	S	5	7	1.7	S	6	9	0.39	S	5	6	1	S	4	6	0.08	S	5	6	1.8	S	5	5	0.31
92822	ZNF276	S	5	8	0.6	S	3	3	0.14	S	4	7	0.53	S	3	3	0.09	S	4	6	0.85	S	4	4	0.16	S	4	9	0.54	S	4	4	0.18	S	4	5	0.73	S	1	1	0	S	6	8	0.32	S	2	3	0.12
3280	HES1	S	5	8	1.6	S	3	7	0.57	S	3	7	2.1	S	3	7	1.2	S	4	7	2.9	S	3	6	1.3	S	4	5	2.2	S	3	5	0.93	S	3	8	2.7	S	4	6	1.2	S	3	8	3	S	4	6	0.58
55183	RIF1	S	4	4	0.02	S	36	50	0.42	S	4	4	0.02	S	16	35	0.17	S	5	8	0.04	S	25	44	0.54	S	13	22	0.43	S	16	34	0.15	S	4	6	0.04	S	16	27	0.22	S	4	6	0.03	S	49	92	2.6
163033	ZNF579	S	4	9	0.71	S	9	17	2.1	S	1	2	0.1	S	10	26	3.4	S	3	7	0.27	S	9	30	2.7	S	4	5	0.17	S	12	21	3.9	S	2	2	0.14	S	11	27	3.4	S	2	3	0.2	S	9	16	1.5
7342	UBP1	S	4	10	12.4	S	7	12	2	S	5	8	16.9	S	9	15	3.3	S	6	13	19.4	S	5	10	1.8	S	5	20	11.3	S	10	16	3.9	S	5	20	11.7	S	7	13	2.6	S	7	16	14.1	S	8	12	2.2
1153	CIRBP	S	4	9	2.5	S	7	9	2.1	S	5	10	4	S	7	10	5	S	8	12	6.1	S	7	12	3	S	8	18	10.9	S	8	10	4.1	S	6	11	6.4	S	8	11	4.3	S	7	12	5.8	S	9	12	3.1
5983	RFC3	S	4	12	1.5	S	6	10	0.91	S	5	11	1.3	S	7	12	1.9	S	4	8	1.1	S	7	12	1.8	S	4	11	2	S	6	10	0.86	S	5	11	2.4	S	7	13	0.98	S	6	8	1.7	S	8	16	0.91
29844	TFPT	S	4	5	0.76	S	6	11	2.9	S	4	5	10	S	5	9	4.5	S	4	5	11.7	S	4	7	4.7	S	5	6	9.8	S	5	9	4.2	S	4	7	11.1	S	5	12	2.5	S	3	4	6.7	S	5	9	2.1
8690	JRKL	S	4	6	1.2	S	6	7	0.77	S	4	8	2.1	S	4	9	0.89	S	4	9	1.9	S	5	7	1.2	S	3	7	2	S	4	6	0.29	S	2	3	0.66	S	3	7	0.7	S	5	7	2.4	S	3	5	0.5
7701	ZNF142	S	4	4	0.2	S	6	10	0.07	S	3	3	0.19	S	5	8	0.1	S	3	3	0.13	S	4	7	0.1	S	5	5	0.23	S	6	11	0.06	S	5	6	0.28	S	4	6	0.09	S	4	6	0.29	S	4	9	0.09
2063	NR2F6	S	4	6	2.9	S	5	12	0.45	S	3	5	2.4	S	4	6	0.49	S	5	10	2.2	S	4	6	0.61	S	4	8	2.7	S	7	11	0.9	S	3	7	1.2	S	3	6	0.48	S	5	12	2.2	S	6	10	0.49
342371	ATXN1L	S	4	6	0.63	S	5	7	0.23	S	3	4	0.66	S	3	8	0.28	S	3	6	0.7	S	6	6	0.38	S	6	9	0.94	S	5	8	0.45	S	3	6	0.84	S	3	3	0.25	S	3	5	0.93	S	5	5	0.13
79811	SLTM	S	4	5	0.27	S	5	7	0.18	S	2	3	0.08	S	3	6	0.08	S	2	5	0.27	S	5	7	0.3	S	2	2	0.23	S	5	9	0.14	S	3	6	0.16	S	2	2	0.13	S	4	6	0.3	S	4	6	0.18
25896	INTS7	S	4	7	0.16	S	4	5	0.04	S	5	6	0.13	S	12	17	0.28	S	5	6	0.18	S	15	19	0.42	S	8	10	0.21	S	10	15	0.11	S	2	2	0.16	S	2	3	0.09	S	4	6	0.12	S	6	7	0.15
653121	ZBTB8A	S	4	14	1.9	S	4	6	0.25	S	5	16	1.2	S	3	3	0.15	S	5	19	2.7	S	2	3	0.17	S	4	12	1.4	S	5	7	0.13	S	4	11	1.5	S	2	3	0.2	S	3	8	1.5	S	3	4	0.19
2625	GATA3	S	4	7	4.9	S	4	8	0.57	S	4	12	4.6	S	4	5	1.1	S	4	8	4.7	S	3	9	1.3	S	3	5	3.8	S	3	4	0.71	S	4	5	4.7	S	3	5	0.69	S	4	6	3.6	S	4	6	0.68
26528	DAZAP1	S	4	6	0.57	S	4	12	0.58	S	2	4	0.73	S	5	8	0.63	S	2	4	0.68	S	3	6	0.35	S	6	10	2.2	S	6	10	0.6	S	5	12	1.4	S	3	6	0.12	S	5	15	1.6	S	4	6	0.27
8427	ZNF282	S	4	6	0.21	S	3	6	0.09	S	5	12	0.46	S	6	8	0.2	S	4	8	0.37	S	7	11	0.26	S	4	8	0.25	S	7	13	0.18	S	6	7	0.42	S	5	7	0.2	S	4	7	0.15	S	6	13	0.15
9898	UBAP2L	S	4	7	0.22	S	3	8	0.04	S	3	6	0.15	S	5	6	0.03	S	3	5	0.23	S	4	9	0.18	S	3	6	0.18	S	6	9	0.08	S	3	5	0.17	S	4	7	0.03	S	4	7	0.27	S	7	13	0.31
84656	GLYR1	S	4	6	0.35	S	3	5	0.25	S	2	5	0.12	S	4	5	0.45	S	1	1	0	S	6	8	0.51	S	4	7	1.3	S	7	13	0.77	S	3	4	0.52	S	5	6	0.1	S	3	4	0.29	S	4	7	0.39
100381270	ZBED6	S	4	7	0.1	S	3	5	0.02	S	2	2	0.15	S	3	5	0.02	S	1	1	0.07	S	4	4	0.06	S	2	4	0.12	S	4	4	0.02	S	3	3	0.17	S	2	3	0.04	S	2	3	0.14	S	1	2	0.02
10522	DEAF1	S	4	9	1.5	S	2	7	0.05	S	5	18	2.8	S	3	7	0.4	S	5	10	2.1	S	3	7	0.37	S	6	9	2.8	S	3	8	0.4	S	5	10	1.5	S	3	6	0.33	S	4	7	2	S	3	7	0.22
23076	RRP1B	S	4	8	0.5	S	2	2	0.05	S	4	10	0.28	S	4	4	0.19	S	3	3	0.39	S	4	4	0.14	S	4	6	0.19	S	5	9	0.13	S	4	6	0.26	S	2	3	0.02	S	3	9	0.16	S	2	2	0.04
27086	FOXP1	S	4	7	1.4	S	2	4	0.11	S	4	14	1.2	S	3	5	0.29	S	5	11	1.9	S	3	7	0.22	S	5	9	1.9	S	4	4	0.22	S	3	8	1.2	S	2	5	0.1	S	4	7	1.5	S	3	5	0.15
54980	C2orf42	S	4	7	0.49	S	2	3	0	S	4	6	1.1	S	3	6	0.14	S	3	6	0.59	S	1	4	0	S	5	11	0.89	S	3	5	0.09	S	2	2	0.35	S	4	6	0.07	S	2	4	0.36	S	3	6	0.05
84458	LCOR	S	4	8	1.4	S	2	3	0.21	S	3	6	0.43	S	4	4	0.34	S	2	5	0.36	S	3	3	0.56	S	3	6	1.5	S	4	4	0.24	S	1	3	0.1	S	2	2	0.27	S	1	3	0.12	S	2	3	0.09
23099	ZBTB43	S	4	6	2.3	S	2	3	0.03	S	3	5	1.5	S	3	3	0.22	S	4	7	1.7	S	4	4	0.12	S	3	7	2	S	2	2	0.13	S	4	6	1.7	S	2	4	0.19	S	4	8	2.1	S	2	3	0.09
55683	KANSL3	S	4	6	0.1	S	1	3	0.04	S	5	6	0.22	S	3	5	0.07	S	4	5	0.35	S	4	7	0.08	S	7	7	0.46	S	4	7	0.03	S	3	6	0.24	S	2	3	0	S	4	5	0.17	S	3	4	0.05
55892	MYNN	S	4	8	0.48	S	1	1	0	S	4	11	0.31	S	1	1	0	S	4	7	0.49	S	2	3	0.08	S	4	5	0.45	S	2	6	0.04	S	4	7	0.32	S	1	2	0	S	2	7	0.07	S	1	2	0
51317	PHF21A	S	4	7	0.29	S	1	1	0.04	S	1	3	0.21	S	3	4	0.08	S	4	5	0.27	S	1	2	0	S	3	3	0.21	S	2	2	0.07	S	2	2	0.18	S	2	3	0.05	S	1	4	0.12	S	1	2	0.03
10025	MED16	S	3	5	0.29	S	8	20	0.24	S	4	17	1.4	S	13	31	0.89	S	4	9	0.62	S	9	16	0.68	S	3	6	0.42	S	6	9	0.38	S	4	5	0.42	S	6	16	0.23	S	4	11	1.3	S	8	13	0.41
23234	DNAJC9	S	3	6	1.6	S	8	12	3.7	S	3	4	1.9	S	8	11	5.3	S	3	5	3.3	S	8	12	4.5	S	4	6	3.7	S	8	9	5.5	S	4	7	2.3	S	9	12	3.7	S	4	5	1.9	S	9	15	3.3
160	AP2A1	S	3	6	0.07	S	7	13	0.07	S	4	4	0.11	S	7	16	0.1	S	5	9	0.15	S	9	14	0.37	S	9	12	0.33	S	12	15	0.1	S	3	4	0.12	S	6	8	0.02	S	3	3	0.12	S	12	19	0.3
9584	RBM39	S	3	5	0.77	S	7	13	1.4	S	2	5	0.79	S	7	10	2.3	S	5	6	2.3	S	8	17	3.6	S	4	8	3.5	S	8	9	2.6	S	1	2	0.7	S	6	11	1.8	S	3	3	1.5	S	8	16	1.8
3725	JUN	S	3	5	2.2	S	6	11	1.2	S	4	6	3.3	S	5	6	0.77	S	5	9	6.6	S	5	8	0.93	S	4	6	4.3	S	5	9	1.2	S	4	5	3.9	S	7	11	1.7	S	4	5	4	S	7	11	1.1
286257	C9orf142	S	3	4	4.4	S	6	10	0.99	S	4	7	6	S	4	6	1.8	S	5	10	7	S	4	8	1.5	S	7	13	9.7	S	2	4	1.3	S	8	13	8.1	S	5	7	1.7	S	6	11	9.4	S	4	5	1.2
8971	H1FX	S	3	5	3.5	S	5	7	1.2	S	5	7	3.5	S	5	5	2.8	S	3	9	3.7	S	6	9	2.8	S	3	6	4.4	S	7	7	2.7	S	4	7	5.8	S	5	8	1	S	3	3	5.2	S	6	7	1.5
79618	HMBOX1	S	3	7	2.1	S	5	7	0.59	S	4	5	4.1	S	2	2	0.36	S	5	9	5.3	S	5	5	0.76	S	5	13	4.9	S	4	7	0.74	S	3	9	1.9	S	2	2	0.27	S	3	5	0.77	S	3	5	0.27
7392	USF2	S	3	4	3	S	4	11	0.8	S	5	9	7	S	7	10	1.3	S	3	7	2.2	S	4	7	1.1	S	5	12	8.4	S	5	11	1.7	S	4	7	3.3	S	2	5	0.5	S	4	10	4.9	S	5	9	0.84
3159	HMGA1	S	3	10	26.2	S	4	13	3	S	5	23	32.9	S	4	9	6.1	S	7	34	38.7	S	3	9	7.7	S	6	33	63.4	S	5	9	7	S	7	27	54.6	S	3	13	6.4	S	5	19	29	S	3	11	4.3
213	ALB	S	3	16	11.7	S	4	10	4.1	S	5	20	12	S	4	12	7.2	S	4	32	13.6	S	5	14	6.3	S	5	18	14.7	S	5	10	6.8	S	2	19	10.8	S	5	12	5	S	3	16	10.4	S	4	11	4
11335	CBX3	S	3	3	2.6	S	4	5	1.4	S	4	7	3.5	S	3	5	1.6	S	4	6	4.8	S	3	5	0.38	S	3	9	6.1	S	4	7	2	S	3	8	6.4	S	4	4	1.2	S	3	8	6	S	4	7	0.47
3202	HOXA5	S	3	4	1.1	S	4	4	0.19	S	3	4	1.3	S	4	5	0.35	S	3	7	1.5	S	2	2	0.28	S	3	6	2.2	S	5	5	0.34	S	3	6	0.78	S	4	5	0.18	S	3	5	1	S	4	5	0.16
6668	SP2	S	3	6	3	S	3	3	0.23	S	5	10	5.1	S	4	7	1.1	S	5	10	4.5	S	3	3	0.41	S	3	7	3.4	S	4	6	0.9	S	3	4	0.77	S	4	4	0.33	S	4	8	4.1	S	3	4	0.26
339287	MSL1	S	3	7	0.98	S	3	7	0.33	S	5	11	3.1	S	2	3	0.67	S	3	9	4	S	4	7	1	S	6	11	4.4	S	5	8	0.92	S	5	15	4.2	S	2	4	0.68	S	3	9	4.2	S	3	4	0.51
79595	SAP130	S	3	3	0.31	S	3	4	0.06	S	3	4	0.35	S	5	6	0.12	S	3	5	0.63	S	4	5	0.15	S	3	4	0.27	S	4	5	0.08	S	4	4	0.56	S	4	7	0.08	S	4	6	0.37	S	6	6	0.25
7027	TFDP1	S	3	7	1.1	S	3	5	0.13	S	3	3	1.7	S	4	12	1.1	S	6	12	6.5	S	4	5	0.5	S	5	6	3.8	S	7	9	0.58	S	6	9	2.3	S	5	8	0.58	S	4	5	1.5	S	3	6	0.19
83741	TFAP2D	S	3	5	18.7	S	3	9	6.7	S	3	8	21.1	S	3	5	8.5	S	3	6	25.1	S	3	7	9	S	3	5	24.1	S	3	4	6	S	4	8	31.4	S	3	7	5.8	S	3	4	16.3	S	3	5	4.2
54108	CHRAC1	S	3	6	25.7	S	2	4	1.3	S	4	8	48.1	S	2	3	2.3	S	4	10	48	S	1	3	0.85	S	3	8	49.9	S	2	3	1.8	S	3	9	52.7	S	3	4	1.6	S	3	8	33.2	S	3	4	0.83
56829	ZC3HAV1	S	3	6	0.04	S	2	3	0.006	S	3	5	0.09	S	5	6	0.08	S	2	5	0.05	S	5	8	0.03	S	2	4	0.06	S	4	5	0.03	S	2	5	0.04	S	3	4	0.004	S	2	6	0.04	S	4	7	0.03
5935	RBM3	S	3	6	12.7	S	2	9	2	S	3	14	10.5	S	3	11	6.3	S	3	8	14.3	S	3	10	5.3	S	3	17	36.5	S	4	8	6.1	S	3	18	26.2	S	4	13	5.2	S	3	24	32.7	S	4	10	3.8
90390	MED30	S	3	5	1.2	S	2	5	0.22	S	3	11	2.7	S	3	6	1.1	S	2	9	2	S	3	4	0.63	S	2	4	1.1	S	4	5	0.65	S	2	6	0.73	S	3	7	0.29	S	2	7	1.9	S	3	8	0.58
1747	DLX3	S	3	5	0.48	S	2	2	0.38	S	3	6	1.1	S	3	3	0.5	S	2	3	1.2	S	2	2	0.52	S	4	6	1.7	S	3	3	0.37	S	2	5	1.3	S	1	1	0.14	S	3	3	1.4	S	2	2	0.23
3315	HSPB1	S	2	3	0.46	S	5	10	1.7	S	3	6	4.7	S	6	12	2.3	S	5	8	5.5	S	6	8	2.1	S	4	5	6	S	7	11	4.4	S	2	2	3.5	S	7	12	2.4	S	2	2	3.5	S	6	11	2
3189	HNRNPH3	S	2	3	0.26	S	3	8	0.18	S	3	3	0.61	S	5	10	0.72	S	4	4	0.58	S	5	9	0.5	S	2	3	0.53	S	3	5	0.51	S	3	4	0.64	S	4	7	0.35	S	5	8	1.1	S	4	8	0.45
6742	SSBP1	S	2	4	0.65	S	2	4	0.65	S	3	3	2.6	S	3	6	2.4	S	1	2	0.62	S	3	5	2	S	1	2	0.72	S	5	6	4.8	S	2	5	2	S	2	3	1.2	S	1	2	0.26	S	2	5	0.54
26097	CHTOP	S	2	7	0.88	S	2	4	0.1	S	3	7	2.1	S	2	8	0.09	S	2	7	1.3	S	2	5	0.06	S	2	6	1.9	S	2	4	0.15	S	2	8	2	S	2	4	0	S	2	11	1.2	S	2	3	0.06
7518	XRCC4	S	2	5	0.55	S	2	5	0.2	S	2	8	1.7	S	3	5	0.45	S	2	9	0.48	S	2	2	0.36	S	3	4	0.78	S	3	4	0.41	S	3	4	0.79	S	2	2	0.25	S	2	3	0.38	S	2	2	0.21
4149	MAX	S	2	4	2.1	S	1	1	0.3	S	2	3	2.2	S	2	2	0.5	S	3	9	3.3	S	1	1	0.41	S	3	5	5.5	S	2	3	0.48	S	4	7	4.2	S	2	3	0.27	S	3	7	4.2	S	2	4	0.45
9862	MED24	S	1	3	0.1	S	8	14	0.09	S	14	18	0.99	S	12	23	0.42	S	7	8	0.37	S	8	12	0.08	S	8	10	0.47	S	7	12	0.14	S	10	14	0.79	S	6	7	0.09	S	13	20	1.1	S	8	13	0.14
51592	TRIM33	S	1	3	0.02	S	6	12	0.07	S	1	2	0.02	S	9	13	0.53	S	1	1	0.01	S	12	15	0.46	S	6	10	0.22	S	12	17	0.15	S	1	4	0.02	S	11	16	0.28	S	1	2	0.02	S	12	20	0.66
6421	SFPQ	S	1	4	0.02	S	4	6	0.04	S	1	1	0	S	4	5	0.13	S	2	4	0.04	S	4	5	0.13	S	2	3	0.1	S	3	6	0.05	S	2	3	0.07	S	3	6	0.05	S	1	1	0	S	4	9	0.05
283254	HARBI1	S	1	1	0.24	S	3	3	0.04	S	2	2	0.29	S	3	3	0.06	S	1	2	0.32	S	2	2	0.16	S	1	2	0.24	S	3	4	0.16	S	2	2	0.35	S	2	2	0.04	S	2	4	0.33	S	2	2	0.03
4335	MNT	S	1	1	0.1	S	2	2	0.02	S	1	1	0.22	S	2	4	0.07	S	2	3	0.35	S	2	2	0.04	S	2	4	0.4	S	2	2	0.07	S	2	3	0.19	S	1	2	0.03	S	3	3	0.66	S	2	4	0.03
124540	MSI2	S	1	1	0.24	S	2	2	0.06	S	1	2	0.38	S	2	2	0.2	S	1	1	0.42	S	2	3	0.3	S	3	5	0.59	S	2	2	0.25	S	3	3	0.94	S	2	5	0.3	S	1	2	0.39	S	1	1	0.11
9477	MED20	S	1	2	0.28	S	1	3	0.18	S	3	4	1.9	S	3	4	0.4	S	1	2	0.36	S	1	2	0.24	S	1	2	0	S	2	2	0.13	S	2	2	0.43	S	1	1	0.15	S	2	4	0.76	S	3	4	0.21
1051	CEBPB	S	1	1	0.95	S	1	3	0.13	S	2	7	1.6	S	1	1	0.28	S	3	5	1.9	S	1	2	0.3	S	2	2	2.3	S	1	1	0.24	S	1	2	1.2	S	1	1	0.2	S	1	1	1	S	1	2	0.1
5926	ARID4A	S	1	3	0.03	S	1	1	0	S	2	3	0.35	S	1	2	0	S	1	3	0.03	S	1	2	0	S	1	1	0.05	S	2	2	0	S	1	3	0.04	S	2	3	0.03	S	2	3	0.05	S	2	2	0.03
65057	ACD	S	1	1	0.54	S	1	1	0.08	S	1	1	0.5	S	2	2	0.29	S	1	1	0.65	S	1	1	0.17	S	1	2	0.69	S	1	1	0.09	S	1	1	0.62	S	2	2	0.2	S	1	2	0.62	S	1	1	0.09
84897	TBRG1	S	1	1	2.3	S	1	1	0.24	S	1	1	2.8	S	1	1	0.42	S	1	2	3.2	S	2	3	0.46	S	1	1	3.3	S	1	1	0.36	S	2	2	2.8	S	1	1	0.47	S	2	2	2.5	S	1	2	0.2
3007	HIST1H1D	S	14	50	81.2	S	17	62	41.5	S	14	57	12.3	S	16	57	57.6	S	13	49	36.4	S	16	63	66.8	S	14	40	247	S	15	54	38.4	S	14	46	64.4	S	16	64	41.8	S	15	54	78.2	S	14	54	39.5
149076	ZNF362	S	10	14	3.5	S	11	23	1.9	S	9	23	4.4	S	8	15	2.3	S	8	23	8.5	S	10	14	2	S	7	14	6	S	11	16	1.6	S	6	10	2.9	S	10	13	0.9	S	6	10	2.1	S	7	13	0.9
10771	ZMYND11	S	1	3	0.2	S	6	7	0.19	S	1	3	0.2	S	5	5	0.15	S	2	5	0.25	S	6	9	0.19	S	2	2	0.24	S	6	6	0.23	S	1	2	0.07	S	4	5	0.1	S	1	2	0.03	S	7	9	0.21
6314	ATXN7	S	7	17	0.63	S	4	7	0.03	S	9	16	1	S	8	12	0.09	S	7	10	0.63	S	5	11	0.22	S	7	9	0.4	S	3	6	0.02	S	6	11	0.66	S	5	9	0.07	S	6	6	0.71	S	5	8	0.07
92105	INTS4	S	6	12	0.16	S	7	9	0.07	S	2	4	0.08	S	10	18	0.15	S	5	8	0.2	S	12	19	0.38	S	7	9	0.17	S	12	18	0.15	S	3	9	0.24	S	7	8	0.11	S	4	6	0.11	S	7	9	0.1
7916	PRRC2A	S	4	4	0.03	S	6	8	0.02	S	3	3	0.03	S	4	6	0.03	S	4	7	0.06	S	6	8	0.05	S	3	3	0.03	S	6	10	0.02	S	4	5	0.06	S	6	9	0.02	S	3	3	0.04	S	7	8	0.02
54625	PARP14	S	4	6	0.01	S	4	4	0	S	4	4	0.06	S	9	12	0.03	S	5	6	0.01	S	5	6	0.03	S	3	3	0.03	S	1	2	0	S	4	5	0.03	S	3	3	0.02	S	3	3	0.03	S	5	7	0.02
83666	PARP9	S	5	7	0.45	S	8	15	0.16	S	4	4	0.19	S	7	15	0.36	S	7	9	0.4	S	6	13	0.12	S	4	7	0.26	S	12	16	0.32	S	6	12	0.41	S	5	9	0.21	S	2	2	0.12	S	6	7	0.08
10521	DDX17	S	3	3	0.29	S	8	16	0.35	S	5	11	0.5	S	11	13	0.69	S	4	6	0.34	S	12	16	0.87	S	5	5	0.67	S	18	30	1.4	S	2	4	0.08	S	11	17	0.53	S	3	3	0.21	S	17	32	1
55167	MSL2	S	3	8	0.94	S	4	4	0.14	S	2	7	0.86	S	3	7	0.18	S	2	6	0.91	S	4	6	0.28	S	4	10	1.4	S	5	9	0.26	S	3	6	0.83	S	3	5	0.08	S	3	7	0.88	S	3	6	0.19
32	ACACB	S	9	11	0.04	S	8	12	0.006	S	9	11	0.06	S	7	8	0.004	S	10	17	0.05	S	10	14	0.02	S	7	9	0.05	S	9	13	0.002	S	9	18	0.11	S	7	10	0.01	S	7	8	0.06	S	8	11	0.009
5993	RFX5	S	8	13	0.69	S	3	6	0.4	S	5	12	0.58	S	3	4	0.09	S	4	8	0.21	S	6	7	0.19	S	8	13	1.1	S	7	11	0.17	S	5	8	0.66	S	1	1	0.03	S	9	14	1.2	S	6	8	0.09
132660	LIN54	S	6	12	0.75	S	5	9	0.07	S	4	4	0.09	S	4	8	0.16	S	5	12	0.34	S	3	12	0.07	S	7	12	0.71	S	7	9	0.17	S	5	12	0.3	S	3	3	0.02	S	6	9	0.62	S	5	8	0.08
1488	CTBP2	S	5	6	1.6	S	8	11	0.55	S	5	6	2.5	S	6	8	0.75	S	6	8	3	S	4	4	0.57	S	7	8	3.6	S	4	4	0.4	S	4	4	1.2	S	4	5	0.39	S	5	7	2.1	S	5	6	0.39
3169	FOXA1	S	4	11	5.3	S	4	9	0.71	S	4	11	4.5	S	4	7	1.6	S	4	13	6.6	S	5	9	1.6	S	3	8	7.5	S	6	22	2.2	S	3	6	5.1	S	3	4	1	S	4	10	5.6	S	5	8	1.8
51586	MED15	S	2	2	0.12	S	6	10	0.42	S	4	7	1.1	S	4	14	0.69	S	4	9	0.78	S	3	4	0.16	S	1	2	0.17	S	4	9	0.04	S	4	7	0.53	S	2	3	0.05	S	6	13	0.89	S	3	6	0.05
11143	KAT7	S	3	3	0.29	S	4	6	0.04	S	3	6	0.8	S	3	5	0.26	S	3	3	0.15	S	5	7	0.24	S	6	10	0.63	S	3	4	0.27	S	2	4	0.61	S	4	6	0.29	S	3	4	1	S	3	5	0.23
79047	KCTD15	S	3	7	1.2	S	5	5	0.13	S	7	7	2.3	S	6	10	0.64	S	3	7	1.7	S	6	12	0.42	S	5	8	2.5	S	5	5	0.38	S	6	11	1.9	S	6	10	0.78	S	6	8	1.9	S	7	13	0.18
129685	TAF8	S	2	4	0.22	S	2	3	0.07	S	2	4	0.13	S	2	4	0.13	S	2	4	0.13	S	2	3	0.13	S	2	3	0.13	S	2	2	0.33	S	1	1	0.15	S	1	1	0.11	S	2	4	0.32	S	1	2	0.09
55929	DMAP1	S	5	7	0.6	S	7	8	0.14	S	2	3	0.38	S	7	9	0.41	S	2	3	0.38	S	4	6	0.41	S	4	5	0.27	S	6	8	0.41	S	2	3	3.8	S	5	8	0.25	S	4	7	0.35	S	7	10	0.37
10413	YAP1	S	3	4	0.4	S	1	3	0	S	2	8	1.7	S	2	3	0.24	S	3	5	0.72	S	1	2	0	S	4	8	0.71	S	1	1	0	S	1	3	0	S	1	2	0.04	S	3	9	1.4	S	2	3	0.14
1958	EGR1	S	1	1	0.12	S	1	1	0.06	S	2	4	0.85	S	3	3	0.41	S	3	6	0.77	S	2	5	0.08	S	2	2	0.28	S	2	6	0.11	S	1	1	0.57	S	2	2	0.19	S	1	2	0.17	S	2	3	0.05
10629	TAF6L	S	5	7	1	S	5	6	0.11	S	3	3	0.66	S	7	8	0.3	S	4	5	0.92	S	4	6	0.37	S	5	6	1.1	S	4	7	0.1	S	1	1	0.03	S	5	5	0.17	S	5	7	1.2	S	8	12	0.28
404281	YY2	S	5	12	11.8	S	4	13	2.4	S	4	14	9.1	S	3	12	1.4	S	4	13	6.1	S	3	12	1.7	S	5	11	17.6	S	3	9	1.7	S	5	12	14.9	S	4	14	2.7	S	4	10	13.7	S	4	16	2.5
3839	KPNA3	S	3	4	1.2	S	6	7	0.5	S	4	6	1.9	S	4	8	0.64	S	4	8	1.4	S	4	8	0.59	S	3	3	1.2	S	6	9	0.8	S	4	5	1.7	S	2	3	0.2	S	4	7	1.3	S	4	4	0.26
3868	KRT16	S	16	34	14.1	S	38	117	38.1	S	14	28	12.1	S	13	31	0.3	S	11	26	5.5	S	17	39	1.3	S	9	18	0.49	S	19	31	0.73	S	6	15	0.13	S	11	22	0.4	S	11	26	1.3	S	18	38	1.3
7528	YY1	S	12	24	5.8	S	10	19	4	S	12	38	15	S	7	17	1.8	S	10	29	4.5	S	8	17	4	S	12	26	17.7	S	8	14	3.8	S	10	26	6.5	S	9	22	3.2	S	7	20	5.2	S	10	27	3.5
6872	TAF1	S	7	8	0.28	S	10	12	0.08	S	5	6	0.36	S	11	14	0.14	S	6	6	0.23	S	11	15	0.11	S	5	7	0.21	S	11	15	0.06	S	8	9	0.36	S	12	17	0.12	S	8	10	0.33	S	8	9	0.08
23314	SATB2	S	11	23	1.3	S	9	13	0.14	S	12	21	2.9	S	8	14	0.31	S	6	7	1.4	S	7	11	0.16	S	9	15	2.7	S	7	11	0.31	S	14	27	4	S	8	12	0.14	S	9	16	2	S	6	9	0.19
55758	RCOR3	S	6	11	0.75	S	6	9	0.01	S	3	5	0.18	S	5	5	1	S	3	5	0.19	S	8	13	0.22	S	5	8	0.48	S	6	10	0.12	S	3	7	0.1	S	4	6	0.61	S	4	6	0.18	S	7	10	0.06
1745	DLX1	S	5	9	0.93	S	1	1	0.17	S	5	9	1.2	S	3	4	0.47	S	5	11	2.3	S	2	4	0.36	S	5	9	2.1	S	3	5	0.19	S	5	6	1.2	S	4	4	0.24	S	5	8	1.3	S	2	4	0.15
7716	VEZF1	S	5	16	6.2	S	4	11	1.7	S	4	15	4.1	S	4	10	2	S	5	25	5.4	S	4	11	2.5	S	5	14	4.9	S	3	4	1.3	S	4	16	4.3	S	3	9	1.3	S	4	18	6.1	S	3	7	0.63
1915	EEF1A1	S	7	8	3.7	S	7	14	1.4	S	4	6	2.8	S	6	14	1.7	S	4	7	3.3	S	8	21	3.4	S	8	15	7.4	S	9	13	3.4	S	6	6	4	S	7	14	2.2	S	4	5	3.3	S	11	20	3.2
1785	DNM2	S	12	16	0.71	S	9	14	0.12	S	14	21	2.2	S	13	19	0.44	S	13	16	1.1	S	15	19	0.75	S	14	16	1.7	S	10	13	0.15	S	12	16	1.7	S	7	10	0.33	S	12	15	2.7	S	15	22	0.57
7030	TFE3	S	8	10	1.8	S	7	8	0.12	S	4	11	1.7	S	7	10	0.63	S	4	9	1.5	S	4	8	0.23	S	7	14	3	S	6	7	0.47	S	6	9	1.7	S	4	4	0.29	S	7	14	2.8	S	4	7	0.22
4782	NFIC	S	5	9	1.6	S	5	6	0.56	S	4	8	0.7	S	4	7	0.69	S	3	5	0.92	S	4	4	0.72	S	8	17	3.9	S	4	4	0.96	S	6	10	2.6	S	3	3	0.67	S	6	13	2.5	S	4	4	0.68
3187	HNRNPH1	S	6	12	0.99	S	5	10	0.56	S	7	17	1.9	S	5	16	0.75	S	6	17	2	S	5	15	1.1	S	5	16	2.1	S	6	11	1.6	S	6	21	2.2	S	6	13	1	S	5	9	1.8	S	8	20	2.4
1105	CHD1	S	6	8	0.62	S	2	4	0.12	S	5	12	0.09	S	7	11	0.003	S	7	12	0.13	S	4	5	0.02	S	6	11	0.77	S	3	3	0.04	S	5	11	0.11	S	3	4	0.14	S	9	17	0.4	S	4	7	0.003
5253	PHF2	S	4	4	0.21	S	13	21	0.45	S	4	5	0.36	S	10	23	0.53	S	5	8	0.3	S	11	16	0.57	S	5	6	0.36	S	12	23	0.44	S	5	5	0.24	S	11	25	0.57	S	4	5	0.25	S	12	24	0.5
7004	TEAD4	S	7	12	1.8	S	7	12	1.5	S	8	12	5.6	S	9	15	1.8	S	5	13	2.9	S	8	11	1.9	S	8	17	0.74	S	9	16	2.1	S	8	8	0.18	S	7	8	1.4	S	6	14	0.74	S	7	9	0.86
3840	KPNA4	S	3	4	0.71	S	5	5	0.26	S	3	6	0.24	S	4	7	0.36	S	4	8	0.68	S	4	8	0.35	S	3	3	1.4	S	6	9	0.56	S	3	3	0.52	S	2	2	0.11	S	2	2	0.39	S	4	5	0.18
9987	HNRNPDL	S	5	8	0.61	S	5	17	0.12	S	4	17	0.68	S	6	19	0.45	S	4	21	0.76	S	6	18	0.3	S	4	21	0.73	S	5	9	0.29	S	4	19	0.71	S	5	23	0.21	S	4	14	0.69	S	5	17	0.15
6880	TAF9	S	2	2	0.96	S	6	7	0.56	S	2	2	1.7	S	6	8	1.2	S	3	3	2.2	S	8	9	1.4	S	3	6	3.8	S	8	10	1.4	S	3	3	3.1	S	7	8	0.94	S	4	7	3.4	S	5	7	0.65
1487	CTBP1	S	5	8	1.3	S	5	7	0.75	S	6	9	3.5	S	6	6	1.4	S	5	8	4.6	S	5	5	1.4	S	7	12	7.2	S	5	5	1.1	S	5	6	4.1	S	5	6	1.1	S	5	7	3.7	S	6	6	1.9
10383	TUBB4B	S	19	92	98.2	S	23	150	22.6	S	17	92	11.2	S	22	169	1.6	S	18	133	12.5	S	23	195	56.4	S	20	136	86.8	S	23	102	66.7	S	23	138	104	S	21	139	4.6	S	20	148	12.4	S	26	198	6.6
7073	TIAL1	S	2	4	1.8	S	5	11	1.4	S	5	9	6	S	4	10	1.5	S	4	5	5.2	S	5	11	1.8	S	3	6	4.2	S	5	8	1.5	S	4	9	3.8	S	5	12	1.6	S	5	15	6.9	S	8	10	0.85
1877	E4F1	S	4	6	0.39	S	2	4	0.01	S	5	6	0.69	S	4	4	0.05	S	4	8	0.66	S	3	3	0.07	S	4	5	0.22	S	1	1	0.01	S	4	5	0.29	S	3	4	0.02	S	4	5	0.51	S	1	1	0.01
57713	SFMBT2	S	9	16	2.7	S	10	19	0.58	S	9	14	2.7	S	11	16	0.39	S	6	6	2.1	S	8	11	0.29	S	7	11	2.5	S	6	7	0.26	S	9	16	3.3	S	5	6	0.12	S	11	14	2.5	S	4	6	0.12
2120	ETV6	S	6	8	1.6	S	5	7	0.18	S	1	1	0.18	S	5	5	0.3	S	2	2	0.35	S	6	7	0.34	S	4	6	0.74	S	3	7	0.35	S	4	5	0.9	S	5	5	0	S	5	5	0.97	S	4	7	0.05
10943	MSL3	S	5	9	1.2	S	2	3	0	S	4	12	1.3	S	5	7	0.38	S	3	9	0.57	S	5	9	0.3	S	4	7	0.92	S	5	7	0.3	S	2	3	0.31	S	4	8	0.18	S	4	5	0.83	S	4	6	0.1
7579	ZSCAN20	S	5	6	0.28	S	3	6	0.01	S	4	4	0.34	S	4	6	0.008	S	4	5	0.25	S	5	6	0.29	S	3	5	0.15	S	4	4	0.008	S	5	7	0.31	S	3	3	0.006	S	6	9	0.32	A	2	2	0.24
8243	SMC1A	S	3	3	0.07	S	6	7	0.04	S	1	1	0.02	S	8	10	0.02	S	1	2	0.01	S	7	9	0.09	S	1	1	0.02	S	2	2	0.003	S	1	2	0.02	S	3	3	0.03	S	1	3	0.02	S	6	7	0.08
8535	CBX4	S	7	8	0.85	S	2	2	0.08	S	3	5	0.74	S	3	4	0.08	S	5	5	0.81	S	2	2	0.01	S	5	8	1.2	S	3	3	0.06	S	6	10	0.72	S	1	1	0.02	S	3	4	0.32	S	4	4	0.11
84128	WDR75	S	7	8	0.82	S	5	7	0.16	S	7	12	0.9	S	7	12	0.25	S	6	10	0.55	S	6	9	0.3	S	6	9	0.69	S	9	15	0.21	S	5	6	0.52	S	3	5	0.2	S	2	2	0.11	S	4	7	0.07
57649	PHF12	S	4	5	0.24	S	6	7	0.11	S	3	3	0.2	S	5	8	0.1	S	2	2	0.2	S	2	2	0.16	S	2	2	0.08	R	3	4	0.07	S	2	3	0.13	S	6	7	0.17	S	1	1	0.13	S	4	5	0.18
9658	ZNF516	S	5	5	0.14	S	5	6	0.02	S	6	10	0.32	S	3	3	0.01	S	4	6	0.14	S	5	6	0.02	S	3	4	0.05	S	2	3	0.004	S	3	4	0.26	S	3	4	0.02	S	5	7	0.15	S	3	3	0.01
8314	BAP1	S	4	9	0.71	S	5	5	0.07	S	6	11	0.8	S	4	6	0.09	S	4	8	0.62	S	4	4	0.12	S	2	3	0.22	S	7	12	0.23	S	7	8	0.84	S	1	1	0.04	S	4	6	0.49	S	3	4	0.02
63035	BCORL1	S	15	19	0.57	S	9	13	0.07	S	9	10	0.39	S	11	18	0.14	S	8	12	0.4	S	11	19	0.21	S	9	10	0.3	S	13	17	0.09	S	5	8	0.2	S	11	14	0.17	S	9	10	0.26	S	11	17	0.16
203245	NAIF1	S	6	11	8.4	S	8	20	2.9	S	4	12	2.8	S	5	13	4.3	S	5	16	8.5	S	4	10	1.7	S	5	11	18.1	S	10	18	6.6	S	4	13	3.6	S	4	6	2.2	S	4	16	5.9	S	6	9	2.3
4899	NRF1	S	3	3	4.7	S	1	2	0.21	S	3	3	4.5	S	1	1	0.62	S	2	2	2.1	S	2	2	0.79	S	1	2	3.9	S	2	2	0.69	S	2	2	2.8	S	2	3	0.33	S	3	4	4.2	S	2	3	0.31
54502	RBM47	S	2	2	0.05	S	4	8	0.25	S	2	3	0.04	S	4	9	0.39	S	2	6	0.18	S	4	5	0.12	S	3	5	0.43	S	6	9	0.34	S	1	1	0.15	S	3	6	0.2	S	2	5	0.35	S	6	9	0.27
57621	ZBTB2	S	3	5	0.27	S	5	11	0.63	S	3	9	0.79	S	4	4	0.18	S	4	9	1.4	S	3	4	0.08	S	3	7	1.2	S	5	7	0.5	S	3	6	0.71	S	5	7	0.75	S	2	3	1	S	4	7	0.45
84159	ARID5B	S	3	3	0.04	S	1	1	0	S	1	1	0.02	S	2	3	0.008	S	3	5	0.09	S	2	2	0	S	3	4	0.1	S	2	2	0	S	1	1	0.02	S	1	1	0.01	S	1	3	0.02	S	2	2	0.02
3104	ZBTB48	S	4	5	1.4	S	3	4	0.23	S	2	4	1.1	S	3	3	0.4	S	3	4	1.4	A	1	1	0.08	S	4	7	0.61	R	1	1	0.09	S	1	1	0.21	S	3	3	0.12	S	1	1	0.1	S	4	4	0.3
6909	TBX2	S	6	12	3	S	7	12	0.58	S	6	11	3.6	S	6	13	1	S	5	11	2.7	S	8	13	1.2	S	7	21	3.6	S	8	13	0.99	S	7	17	3.1	S	6	11	0.75	S	6	25	3.5	S	6	12	0.72
3005	H1F0	S	3	3	0.99	S	7	11	7.1	S	2	2	1.4	S	4	12	8.9	S	1	3	0.22	S	4	10	9.3	S	1	1	0.25	S	5	9	5.9	S	3	4	1.9	S	5	11	8.4	S	2	2	1.3	S	5	11	6.8
5093	PCBP1	S	3	3	0.98	S	5	12	3.1	S	1	2	0.56	S	8	15	5.5	S	2	2	2.1	S	10	26	12.5	S	6	13	8.2	S	7	13	2.2	S	4	6	2.7	S	7	17	4.6	S	2	2	1.8	S	9	23	6.8
5644	PRSS1	S	1	5	15.8	S	1	5	2.9	S	1	2	15.7	S	1	3	1.9	S	1	2	12.6	S	1	2	1.8	S	1	3	15.9	S	1	3	0.78	S	1	2	7.9	S	1	4	2.4	S	1	3	15.7	S	1	2	1.3
6873	TAF2	S	5	6	0.24	S	9	13	0.09	S	3	5	0.16	S	8	9	0.13	S	3	3	0.09	S	10	10	0.22	S	3	4	0.19	S	6	7	0.07	S	5	5	0.28	S	8	10	0.07	S	2	3	0.05	S	9	12	0.11
29079	MED4	S	2	2	0.34	S	3	7	0.24	S	3	5	1.4	S	5	10	1.2	S	1	1	0	S	4	11	0.37	S	2	3	0.41	S	4	6	0.35	S	1	2	0.43	S	4	10	0.22	S	2	3	0.8	S	4	6	0.3
6944	VPS72	S	3	3	0.57	S	2	3	0.17	S	3	3	0.98	S	3	4	0.44	S	2	3	0.96	S	3	4	0.64	S	2	2	1.3	S	2	2	0.21	S	1	1	0.21	S	3	3	0.55	S	1	2	0.57	S	1	2	0.18
6500	SKP1	S	4	5	1.1	S	2	2	0	S	4	4	2.4	S	1	1	0.18	S	3	4	1.8	S	2	2	0.13	S	4	8	2.7	S	3	5	0.14	S	5	12	1.8	S	1	1	0.09	S	2	5	0	A	1	1	0
57594	HOMEZ	S	4	5	0.33	S	2	4	0.09	S	2	3	0.28	S	2	6	0.11	S	3	6	0.33	S	1	4	0.11	S	1	3	0.33	S	3	5	0.12	S	1	5	0.25	S	1	3	0.04	S	2	5	0.31	S	1	4	0.07
57623	ZFAT	S	4	4	0.11	S	2	3	0.009	S	2	3	0.07	S	2	4	0.03	S	2	2	0.05	S	2	4	0.02	S	2	3	0.08	S	2	4	0.01	S	2	3	0.12	S	2	3	0.04	S	1	1	0.03	R	1	1	0
9969	MED13	S	3	3	0.08	S	5	8	0.03	S	7	13	0.34	S	10	16	0.12	A	2	2	0.03	S	5	5	0.04	S	2	2	0.06	S	1	2	0.005	S	5	6	0.17	S	2	2	0	S	9	13	0.29	S	6	9	0.04
55226	NAT10	S	6	6	0.44	S	5	6	0.05	S	5	5	0.45	S	2	2	0.02	S	6	6	0.39	S	3	4	0.03	S	5	7	0.45	S	4	4	0.04	S	6	6	0.54	S	4	5	0.04	S	8	9	0.44	S	3	3	0.04
93624	TADA2B	S	3	3	0.46	S	3	4	0.1	S	2	2	0.64	S	1	1	0.15	S	2	3	0.63	S	1	3	0.1	S	3	8	0.93	S	2	3	0.12	S	2	4	0.45	S	1	2	0.11	S	1	2	0.52	S	1	4	0.07
6045	RNF2	S	4	8	2.2	S	3	6	0.23	S	4	14	2.1	S	4	8	0.53	S	3	12	1.6	S	2	6	0.43	S	2	11	1.6	S	4	6	0.44	S	2	12	1.7	S	3	6	0.64	S	2	7	1.6	S	2	4	0.54
4784	NFIX	S	4	8	0.67	S	3	5	0.66	S	4	7	1.3	S	5	8	0.07	S	4	6	1.3	S	5	6	0.59	S	3	6	1.6	S	5	8	0.93	S	3	5	1.6	S	4	6	0.79	S	2	2	0.41	S	3	4	0.86
7589	ZSCAN21	S	4	6	0.62	S	2	5	0.14	S	6	17	2.6	S	5	6	0.5	S	2	4	0.07	S	4	5	0.57	S	5	7	0.53	S	6	9	0.64	S	2	2	0.13	S	5	6	0.39	S	3	4	0.49	S	6	7	0.29
2967	GTF2H3	S	7	12	6	S	4	7	0.89	S	5	13	6.8	S	4	6	1.7	S	4	6	5.5	R	3	3	1.4	S	7	13	9.1	S	5	8	1.6	S	7	15	8.9	S	3	3	1.4	S	5	13	7	S	4	6	1.2
9329	GTF3C4	S	7	10	0.51	S	8	15	0.18	S	5	6	0.36	S	8	10	0.28	S	4	5	0.35	S	9	11	0.43	S	5	6	0.44	S	7	7	0.2	S	9	11	0.95	S	9	9	0.24	S	2	2	0.02	S	9	14	0.24
9330	GTF3C3	S	6	10	0.39	S	6	10	0.13	S	4	6	0.58	S	5	7	0.21	S	3	5	0.32	S	7	11	0.62	S	4	4	0.58	S	5	9	0.21	S	5	6	0.72	S	8	12	0.25	S	5	5	0.64	S	8	17	0.33
57325	CSRP2BP	S	3	4	0.17	S	5	6	0.13	S	2	2	0.2	S	4	6	0.16	S	6	10	0.65	S	3	3	0.1	S	3	4	0.24	S	2	3	0.04	S	4	4	0.44	S	4	5	0.14	S	3	4	0.24	S	5	6	0.15
9913	SUPT7L	S	3	4	0.81	S	4	4	0.32	S	2	4	0.76	S	4	5	0.59	S	2	4	0.84	S	2	3	0.25	S	2	4	0.85	S	5	7	0.35	S	2	2	0.53	S	3	7	0.26	S	2	5	0.6	S	4	7	0.19
64412	GZF1	S	1	2	0.15	S	6	10	0.16	S	2	3	0.18	S	6	7	0.34	S	2	2	0.18	S	4	5	0.25	S	2	2	0.17	S	9	10	0.3	S	1	2	0.1	S	5	7	0.17	S	2	3	0.15	S	5	8	0.18
124944	C17orf49	S	2	2	2	S	2	4	0.33	S	1	3	0	S	3	3	0.9	S	2	3	2.8	S	3	3	0.73	S	3	4	6.1	S	2	2	0.97	S	3	5	6.2	S	2	3	0.7	S	1	2	0.98	S	2	2	0.43
1025	CDK9	S	1	2	0.25	S	5	7	0.09	S	1	1	0.27	S	5	9	0.35	S	1	3	0.37	S	5	9	0.22	S	1	3	0.47	S	4	7	0.29	S	1	3	0.29	S	3	3	0.19	S	2	3	0.6	S	5	6	0.11
10902	BRD8	S	4	5	0.13	S	3	3	0.03	S	4	7	0.11	S	4	5	0.03	S	2	3	0.03	S	3	3	0.03	S	3	4	0.12	S	3	3	0.009	S	4	4	0.18	S	4	5	0.007	S	2	3	0.13	S	4	5	0.06
80204	FBXO11	S	6	8	0.14	S	6	8	0.05	S	3	3	0.06	S	3	5	0.05	S	1	1	0.03	S	2	2	0.07	S	3	3	0.07	S	4	5	0.005	S	3	6	0.15	S	3	3	0.04	S	2	2	0.05	S	2	2	0.05
11083	DIDO1	S	3	4	0.02	S	16	20	0.15	S	2	4	0.04	S	9	10	0.14	S	2	2	0.04	S	14	20	0.32	S	6	7	0.13	S	21	24	0.25	S	2	3	0.02	S	11	20	0.28	S	3	3	0.09	S	30	46	0.95
65123	INTS3	S	5	7	0.14	S	13	18	0.23	S	4	5	0.24	S	13	16	0.29	S	2	2	0.03	S	8	11	0.28	S	2	2	0.09	S	11	14	0.15	S	4	5	0.28	S	9	16	0.21	S	4	6	0.23	S	9	13	0.21
84878	ZBTB45	S	4	6	2.6	S	9	11	1.5	S	4	5	2.6	S	7	12	2.5	R	2	2	1.8	S	7	11	2.3	S	5	10	3.5	S	6	9	1.8	S	4	5	2.6	S	6	9	1.5	S	4	7	2.8	S	6	12	1.4
84148	KAT8	S	1	1	0.27	S	1	1	0.07	R	2	3	0.19	S	1	1	0.13	S	2	3	0.25	S	3	4	0.49	S	4	4	0.57	S	2	3	0.11	S	1	1	0.19	S	1	1	0.11	S	1	1	0.15	S	3	4	0.22
7750	ZMYM2	S	1	1	0.006	S	7	8	0.05	R	1	1	0.01	S	9	10	0.06	S	3	3	0.003	S	6	9	0.06	R	2	2	0.05	S	6	7	0.03	S	1	1	0.005	S	5	7	0.03	S	1	1	0.007	S	9	11	0.18
112869	SGF29	S	1	5	0.44	S	1	6	0.06	R	1	6	0.28	S	2	11	0.21	R	3	4	11.4	S	1	8	0.04	S	1	7	0.77	S	4	8	0.38	S	2	7	0.74	S	1	5	0.07	S	2	13	0.37	S	2	7	0.04
3301	DNAJA1	S	1	2	0.1	S	2	5	0.18	R	2	3	0.52	S	3	4	0.35	A	1	2	0.46	S	2	4	0.22	S	3	4	0.49	S	3	4	0.32	S	2	3	0.32	S	3	4	0.33	S	2	2	0.4	S	3	5	0.35
81857	MED25	S	1	2	0.23	S	1	1	0.05	R	1	1	0.14	S	1	3	0.23	S	1	2	0.19	S	1	1	0.14	S	2	5	0.2	S	2	3	0.15	S	1	3	0.01	S	1	1	0.08	S	2	2	0.07	S	1	1	0.11
114785	MBD6	S	3	3	0.03	S	3	4	0.01	A	1	1	0.11	S	2	3	0.03	R	1	3	0	R	1	1	0	S	2	2	0.07	S	1	2	0	S	2	2	0.16	S	1	1	0	S	4	5	0.37	S	2	2	0.36
5978	REST	S	5	8	0.1	S	6	6	0.14	S	4	4	0.31	S	4	4	0.23	S	6	7	0.41	S	7	8	0.17	S	2	2	0.15	S	5	5	0.08	S	5	7	0.25	S	7	8	0.2	S	7	12	0.41	S	7	8	0.26
571	BACH1	S	3	6	0.13	S	1	2	0	S	2	2	0.12	S	3	4	0.007	S	5	7	0.2	S	4	5	0.02	S	3	3	0.17	S	3	5	0.01	S	2	2	0.17	S	1	1	0	S	2	3	0.14	S	2	2	0.01
51562	MBIP	S	1	1	0.27	S	2	2	0.08	S	4	6	0.86	S	6	9	0.31	S	2	6	0.94	S	5	6	0.29	S	4	8	0.57	S	3	3	0.29	S	2	4	0.37	S	3	4	0.13	S	3	3	0.46	S	2	3	0.06
4773	NFATC2	S	6	10	0.27	S	3	3	0.02	S	7	13	0.32	S	6	9	0.09	S	6	11	0.44	S	4	5	0.06	S	8	16	0.6	S	3	4	0.03	S	7	13	0.44	S	4	4	0.02	S	8	10	0.76	S	3	3	0.09
2005	ELK4	S	2	2	0.68	S	2	2	0.13	S	1	1	0.62	S	2	3	0.22	S	2	2	0.95	S	2	2	0.28	S	1	1	0.87	S	2	2	0.22	S	1	2	0.73	S	2	2	0.2	S	1	2	0.75	S	2	3	0.13
27107	ZBTB11	S	4	5	0.18	S	2	4	0.01	S	1	1	0.07	S	2	2	0.01	S	1	2	0.02	S	1	1	0.007	S	3	4	0.08	S	1	2	0.006	S	2	4	0.14	S	2	2	0.01	S	2	3	0.15	S	1	1	0.01
406	ARNTL	S	3	4	0.44	S	5	5	0.24	S	3	4	0.99	S	4	6	0.27	S	3	5	0.52	S	4	5	0.34	S	3	10	1.2	S	6	7	0.29	S	3	3	0.49	S	2	2	0.05	S	3	4	0.69	S	4	6	0.2
10725	NFAT5	S	4	5	0.25	S	3	5	0.03	S	1	2	0.04	S	3	5	0.04	A	1	1	0.03	R	1	1	0.04	S	1	2	0.03	R	2	2	0.02	S	1	1	0.07	S	2	3	0.07	S	2	3	0.13	A	2	2	0.03
64864	RFX7	S	6	6	0.07	S	1	1	0	S	4	5	0.14	R	2	2	0	S	5	10	0.11	R	2	2	0	S	4	5	0.08	R	1	1	0	S	5	6	0.15	S	1	1	0	S	3	3	0.12	S	2	3	0.01
6230	RPS25	S	2	2	4.7	S	2	2	0.26	S	2	2	2.3	S	1	1	0.4	A	1	1	3.1	S	2	2	1.4	S	3	4	9.6	S	2	2	0.96	S	3	3	7.4	S	2	2	0.67	S	2	3	6.1	S	1	1	0.28
54904	WHSC1L1	S	1	4	0.13	R	1	2	0.03	S	2	3	0.1	A	2	2	0	S	6	11	0.17	S	3	4	0.008	S	3	5	0.18	R	3	4	0	S	3	8	0.1	S	1	1	0.004	S	1	1	0.06	R	2	3	0
25885	POLR1A	S	12	23	0.18	R	4	6	0.003	S	6	8	0.13	S	6	11	0.02	S	13	21	0.19	S	2	2	0.01	S	7	10	0.12	S	2	3	0.003	S	7	12	0.23	S	5	5	0.01	S	10	17	0.17	S	5	7	0.02
64858	DCLRE1B	S	8	10	1.4	R	3	3	0.06	S	2	8	0.28	S	3	4	0.11	S	5	10	1	S	2	3	0.07	S	4	4	1.1	S	3	5	0.13	S	6	8	0.97	S	4	7	0.05	S	4	7	0.71	S	2	4	0.04
9612	NCOR2	S	6	8	0.06	R	1	1	0.003	S	3	4	0.03	R	1	1	0.002	S	1	1	0.02	S	2	3	0.03	S	4	6	0.05	S	2	2	0.002	S	2	2	0.01	S	5	7	0.01	S	1	1	0.008	S	5	5	0.03
6497	SKI	S	3	3	0.11	R	1	1	0	R	2	2	0.19	R	2	3	0.05	S	3	3	0.21	R	2	2	0.02	S	4	5	0.19	R	2	2	0.05	S	1	1	0.19	S	2	2	0.01	S	1	1	0.06	A	1	1	0
387032	ZKSCAN4	S	2	2	0.12	A	1	1	0	R	2	2	0.18	S	1	1	0.02	S	3	3	0.2	S	1	1	0	S	3	3	0.26	A	2	2	0.02	S	1	1	0.12	S	2	2	0.04	S	1	1	0.07	S	2	3	0.04
55656	INTS8	S	7	8	0.23	S	7	9	0.1	S	5	10	0.28	S	8	12	0.18	S	4	8	0.21	S	7	8	0.21	S	5	8	0.31	S	4	9	0.06	S	4	6	0.23	S	6	7	0.15	S	4	5	0.3	S	7	12	0.15
9328	GTF3C5	S	5	6	0.81	S	7	12	0.25	S	8	10	2.1	S	7	13	0.41	S	5	8	0.85	S	10	15	1.2	S	7	15	1.2	S	10	17	0.62	S	5	9	0.88	S	9	12	0.37	S	6	8	0.97	S	9	14	0.55
7572	ZNF24	S	4	7	0.6	S	3	6	0.13	S	4	5	0.75	S	3	5	0.25	S	3	4	0.43	S	4	4	0.38	S	6	8	1.5	S	5	6	0.41	S	3	4	0.83	S	4	4	0.14	S	3	4	0.62	S	3	5	0.18
10147	SUGP2	S	1	1	0.13	S	4	6	0.02	S	1	1	0.03	S	5	6	0.007	S	1	1	0	S	6	7	0.08	S	3	6	0.05	S	3	5	0.009	S	3	3	0.2	S	6	8	0.03	S	2	3	0.16	S	6	9	0.1
117159	DCD	S	1	1	0.31	S	4	9	2.8	S	1	2	0.57	S	2	5	2.6	S	1	2	0.32	S	3	8	6.7	S	1	1	0.26	S	3	6	1.4	S	1	2	0.51	S	3	6	2.6	S	1	4	0.53	S	2	3	3.2
26512	INTS6	S	2	2	0.13	S	9	16	0.2	S	4	8	0.23	S	10	16	0.31	S	4	5	0.16	S	13	18	0.56	S	4	5	0.21	S	8	16	0.16	S	5	5	0.37	S	8	13	0.17	S	1	1	0.07	S	8	14	0.23
5989	RFX1	S	4	5	0.17	S	7	9	0.14	S	2	5	0.18	S	5	8	0.19	S	5	7	0.33	S	4	8	0.17	S	5	6	0.27	S	5	9	0.05	S	3	4	0.29	S	5	6	0.13	S	4	6	0.41	S	6	9	0.18
80789	INTS5	S	4	4	0.09	S	7	8	0.16	S	4	6	0.35	S	9	12	0.38	S	2	3	0.1	S	8	11	0.38	S	2	2	0.18	S	5	8	0.13	S	2	4	0.21	S	5	8	0.18	S	2	2	0.06	S	6	13	0.19
6929	TCF3	S	2	2	0.11	S	1	1	0	S	1	2	0.03	S	1	1	0.02	S	2	5	0.2	S	1	2	0.02	S	2	2	0.12	S	2	2	0.05	S	1	2	0.01	S	1	2	0	S	2	2	0.02	S	1	1	0.02
23064	SETX	S	2	3	0.01	S	3	3	0.005	R	1	1	0.01	S	4	5	0.003	S	6	7	0.09	S	9	10	0.04	S	6	6	0.06	S	4	6	0.005	S	2	2	0.02	S	6	6	0.006	S	6	7	0.08	S	10	14	0.05
147807	ZNF524	S	2	2	1.8	S	2	2	0.25	R	2	3	2	S	1	1	0.37	S	3	4	2.3	S	1	1	0.51	S	2	2	2.4	S	2	2	1.5	S	2	3	2.4	S	3	3	1.5	S	3	3	2.2	S	2	2	0.98
2091	FBL	S	1	2	0.5	S	3	3	0.48	R	1	1	0.11	S	2	4	0.79	A	1	1	0.16	S	3	6	1	A	1	2	0.45	S	4	5	0.85	S	1	4	0.45	S	3	5	0.47	S	1	3	0.36	S	2	3	0.24
25913	POT1	S	1	1	0.1	S	2	3	0.11	A	1	1	0.06	S	1	1	0.06	S	1	1	0.17	S	2	2	0.06	S	1	1	0.17	S	2	2	0.06	S	2	2	0.37	S	2	4	0.06	S	2	2	0.22	S	1	1	0.05
51222	ZNF219	S	5	6	0.5	S	3	4	0.01	S	8	12	0.78	S	2	5	0.1	S	9	16	0.81	S	2	2	0.02	S	6	8	0.52	S	3	4	0.1	S	7	8	1.1	S	2	3	0.07	S	5	5	0.52	S	2	3	0.06
4605	MYBL2	S	2	3	0.08	S	2	2	0	S	1	3	0.05	R	1	1	0	S	4	7	0.28	S	3	3	0.03	S	4	6	0.25	S	4	7	0.02	S	1	1	0.07	S	1	1	0	S	1	1	0.05	S	1	1	0
10849	CD3EAP	S	2	6	0.05	S	2	2	0.04	R	1	2	0.09	S	1	2	0.04	S	2	7	0.74	S	1	1	0.17	S	3	9	0.48	S	1	2	0	S	3	5	0.48	S	2	4	0.04	S	2	5	0.31	S	3	4	0.15
4331	MNAT1	S	1	2	0.84	R	1	1	0.38	S	3	5	4.2	S	3	5	1.4	R	2	6	4.8	S	3	4	1.1	S	2	7	1.5	S	2	2	0.87	S	2	5	0.43	S	3	5	1.1	S	3	9	6.4	S	4	4	0.86
57062	DDX24	S	4	5	0.13	R	1	1	0.008	A	3	3	0.17	S	3	3	0.02	S	1	2	0	S	4	5	0.04	S	1	1	0.03	R	1	1	0	S	1	1	0.04	S	2	3	0.02	S	2	4	0.1	S	4	5	0.04
57215	THAP11	R	1	4	0.54	S	2	2	0.11	S	1	1	0.46	S	2	4	0.31	S	1	1	0.56	S	2	2	0.46	S	1	2	0.7	S	2	3	0.41	S	1	3	0.56	S	2	4	0.24	S	1	2	0.5	S	2	2	0.2
4361	MRE11A	R	2	2	0.04	S	4	5	0	S	3	7	0.12	S	5	7	0.03	S	2	4	0.07	S	5	9	0.1	S	2	2	0.13	S	8	11	0.13	S	2	2	0.09	S	4	4	0.004	S	1	1	0.02	S	8	12	0.15
4801	NFYB	R	1	2	3.7	S	2	2	1.3	S	2	3	12.6	S	2	3	3.4	S	2	4	12	S	1	2	1.2	S	2	2	10.6	S	2	2	2.5	S	1	1	6.1	S	2	3	2.4	S	1	1	6.4	S	2	2	0.99
84759	PCGF1	R	4	4	3.1	S	2	7	0.22	S	5	19	3.9	S	3	5	1.2	S	4	18	1.8	S	6	13	1	S	6	6	6.5	S	4	5	0.45	S	7	8	3.5	S	5	6	4.1	S	6	8	4.3	S	4	5	3
2130	EWSR1	R	1	1	0	R	1	1	0	S	2	2	0.07	S	1	1	0	S	1	2	0	S	1	2	0.06	S	1	1	0	S	1	2	0	S	2	2	0.07	S	1	1	0	S	2	2	0	S	2	4	0
3838	KPNA2	A	1	1	0.13	S	2	2	0.07	R	1	1	2.3	S	5	9	0.15	S	1	1	0.23	S	6	9	0.39	S	3	4	0.86	S	2	3	0.14	S	1	1	0.31	S	3	6	0.09	S	3	4	0.52	S	4	4	0.2
84271	POLDIP3	S	4	8	0.84	S	1	1	0	S	2	10	0.36	S	1	1	0	S	3	6	0.56	S	1	1	0.02	S	6	10	0.91	S	2	6	0.02	S	5	12	1.2	S	2	2	0	S	5	13	1.2		0	0	0
7546	ZIC2	S	1	1	0.05	S	1	2	0.08	S	2	2	0.73	S	1	1	0.12	S	1	1	0.72	S	1	1	0.15	S	2	2	0.08	S	1	1	0.12	S	1	2	0.14	S	3	3	0.15	S	2	2	0.1		0	0	0
124359	CDYL2	R	1	1	0.42	S	2	3	0.08	S	1	2	0.42	S	3	5	0.19	S	1	1	0.51	A	1	1	0.11	S	1	1	0.39	S	1	1	0.1	S	1	1	0.43	S	1	1	0	S	1	1	0.37		0	0	0
6601	SMARCC2	S	2	7	0.02	S	2	2	0.006	S	2	3	0.02	S	5	7	0.06	S	1	2	0.006	S	8	11	0.09	S	2	4	0.04	S	5	6	0.03	S	2	6	0.05	S	7	10	0.08	S	1	1	0.01	S	6	8	0.08
10131	TRAP1	S	1	2	0.17	S	1	1	0	S	1	1	0.13	S	1	2	0.07	S	1	1	0.14	S	1	2	0.1	S	1	1	0.14	S	1	2	0.1	S	1	1	0.08	S	1	2	0.09		0	0	0	S	2	3	0.21
4088	SMAD3	S	2	2	0.94	S	2	4	0.07	S	2	2	1	S	2	3	0.18	S	2	4	1.2	S	1	2	0.06	S	2	2	1.4	S	2	3	0.13	S	1	1	0.28	S	1	1	0.06		0	0	0	S	2	4	0.12
9533	POLR1C	S	1	1	0.17	S	3	3	0.15	S	3	3	0.59	S	3	6	0.16	S	3	4	0.71	S	1	4	0.08	S	2	3	0.28	S	2	5	0.06	S	3	6	0.42	S	2	2	0.12		0	0	0	S	3	7	0.09
10474	TADA3	S	3	3	1.7	S	3	4	0.18	S	1	1	0.61	S	6	8	0.34	S	2	2	0.63	S	6	8	0.56	A	2	2	1.2	S	5	7	0.11	S	2	2	0.94	S	4	7	0.21		0	0	0	S	4	7	0.21
9126	SMC3	S	1	1	0	S	5	6	0	S	2	2	0	S	3	4	0.02	S	2	2	0.03	S	6	8	0.07	A	1	1	0	S	4	5	0.008	S	2	3	0.02	S	5	6	0.03		0	0	0	S	6	8	0.12
84922	FIZ1	R	1	2	0.44	S	3	4	0.6	S	1	1	0	S	2	3	0.43	R	1	1	0.41	S	2	3	0.32	S	1	1	0.07	S	3	3	0.87	S	2	2	0.58	S	1	1	0.18		0	0	0	S	2	3	0.48
83860	TAF3	R	1	1	0.12	S	4	6	0.07	S	2	3	0.05	S	5	5	0.13	S	3	3	0.09	S	5	9	0.13	S	3	3	0.07	S	5	6	0.06	S	2	2	0.19	S	4	4	0.1		0	0	0	S	6	9	0.13
7543	ZFX	S	7	14	6.5	S	6	10	1.4	S	6	11	6.7	S	6	8	1.6	S	4	8	1.7	S	3	6	1.6	S	2	7	1.8	S	5	10	1.3	S	6	16	6.6	S	4	6	0.73	S	5	10	5.5	S	4	8	1.6
58495	OVOL2	S	3	4	0.46	S	5	5	0.59	R	3	4	0.51	S	5	5	0.92	R	2	2	0.07	S	4	6	0.81	S	4	5	0.8	S	4	4	0.58	S	4	5	0.52	S	1	3	0.07	S	3	3	0.51	S	2	3	0.23
55578	SUPT20H	S	2	5	0.13	S	2	3	0	S	2	6	0.04	S	1	1	0.11	S	2	4	0.05	S	2	2	0.11	S	3	6	0.43	S	2	3	0.02	S	3	4	0.04		0	0	0	S	1	1	0.19	S	2	3	0
56987	BBX	S	7	9	0.25	A	2	2	0.003	S	3	3	0.29	S	2	4	0.03	S	5	7	0.32	S	3	4	0.02	S	5	5	0.29	S	2	2	0.009	S	2	3	0.3		0	0	0	S	3	3	0.28	R	1	1	0.002
7013	TERF1	S	4	4	0.41	R	1	1	0	S	1	1	0.17	S	1	1	0	S	3	3	0.43	A	1	1	0	S	3	3	0.32	S	1	1	0	S	1	2	0.18		0	0	0	S	1	1	0.2	S	2	2	0
3660	IRF2	S	1	3	0.67	R	2	2	0.04	S	1	2	0.3	S	1	1	0	S	1	4	0.2	S	1	2	0.02	S	1	4	0.84	S	1	1	0.08	S	1	4	0.44		0	0	0	S	2	6	4.7	S	2	2	0.03
4800	NFYA	S	2	6	8.9	S	2	4	1.6	S	2	8	46.5	R	1	2	0.74	S	1	7	61.6	S	1	2	2.7	S	2	11	68.5	S	1	3	2	S	3	11	19.2		0	0	0	S	1	4	51.1		0	0	0
23595	ORC3	S	3	6	0.59	R	2	2	0	S	3	8	0.56	A	1	1	0.02	S	4	7	0.63	S	1	1	0	S	2	4	0.41	A	1	2	0.02	S	2	3	0.39		0	0	0	S	2	4	0.21		0	0	0
3853	KRT6A	S	19	36	4.9	S	39	105	25	S	17	36	11.1	S	18	40	0.69	S	12	20	3.7	S	21	60	2.5	S	8	14	0.32	S	20	34	1.9	A	5	10	0	S	19	46	0.92	S	14	30	6.2	S	21	50	1.2
4781	NFIB	S	4	4	0.93	S	3	6	0.76	S	4	18	5.2	S	5	10	1.3	S	4	6	5.3	S	3	4	0.39	S	3	5	5.2	S	5	9	1.5	A	1	2	0	S	4	8	1	S	3	4	3.9	S	5	8	1.3
9440	MED17	S	5	8	0.71	S	5	7	0.35	S	7	20	1.4	S	11	14	1.1	S	2	6	0.21	S	5	12	0.45	S	3	6	0.58	S	8	11	0.57		0	0	0	S	6	7	0.35	S	6	7	0.82	S	9	10	0.47
7494	XBP1	S	2	5	0.18	S	5	12	0.73	S	3	6	0.49	S	4	5	0.9	S	1	5	0.31	S	3	5	0.56	S	3	4	0.75	S	4	8	1		0	0	0	S	2	4	0.37	S	2	7	0.88	S	2	5	0.24
10362	HMG20B	S	1	2	0.32	S	2	4	0.14	S	1	3	0.35	S	4	4	0.24	S	1	1	0.32	S	2	3	0.25	S	2	4	0.52	S	2	4	0.22		0	0	0	S	3	3	0.04	S	1	3	0.47	S	3	4	0.16
56922	MCCC1	S	2	2	0.09	S	3	3	0.05	S	3	8	0.14	S	3	3	0.02	S	1	1	0.14	S	2	2	0.08	S	2	3	0.12	S	3	6	0.05		0	0	0	S	1	2	0.03	S	1	1	0.09	S	3	6	0.05
55174	INTS10	S	1	2	0.09	S	2	2	0.06	A	1	1	0.09	S	3	3	0.14	A	1	1	0.05	S	5	6	0.25	S	1	2	0.1	S	5	7	0.16		0	0	0	S	3	4	0.1	S	1	2	0.09	S	3	4	0.09
51058	ZNF691	S	2	3	0.32	S	1	1	0.11	R	1	1	0.21	S	3	5	0.14	R	1	1	0.25	S	2	5	0.15	S	2	2	1.1	S	1	2	0.09		0	0	0	S	2	2	0.12	S	1	2	0.26	S	2	4	0.08
3313	HSPA9	S	3	3	0.18	S	3	4	0	S	1	1	0.05	S	3	5	0.05	A	1	2	0.06	S	2	2	0.08	R	2	2	0.29	S	3	7	0.04		0	0	0	S	6	7	0.04	S	1	1	0	S	3	3	0.04
56941	HMCES	S	1	1	0.16	S	1	5	0.05	S	1	1	0.09	S	3	4	0.2	S	2	4	0.1	S	3	7	0.01	S	3	4	0.31	S	4	5	0.26		0	0	0	S	3	9	0.25	S	1	1	0.16	S	2	6	0.06
9442	MED27	S	2	2	0.03	S	3	4	0.02	S	1	3	0.63	S	4	5	0.48	R	1	1	0	R	2	2	0.18	R	1	1	0	S	3	4	0.1		0	0	0	S	2	2	0.12	S	1	4	0.12	A	1	2	0.03
1999	ELF3	S	2	2	0.32	A	1	1	0.04	S	1	2	0	R	1	1	0.12	S	1	2	0.28	R	1	1	0.07	S	2	3	0.81	S	2	5	0.16		0	0	0	S	1	1	0.14	S	1	1	0.33		0	0	0
27339	PRPF19	A	1	1	0.11	R	1	1	0.03	S	1	4	0	A	1	1	0	S	1	2	0	R	2	2	0.09	R	1	2	0	S	2	2	0.12		0	0	0	S	1	1	0.05		0	0	0	S	2	4	0.08
23316	CUX2	S	8	20	0.03	S	9	22	1.5	S	7	27	0.07	S	9	24	0.03	S	9	29	0.88	S	9	24	2.4	S	7	24	0.04	A	8	23	0	S	11	28	0.06	S	8	15	0.03	S	8	24	0.04	S	8	24	0.007
65986	ZBTB10	S	8	10	0.54	S	4	6	0.06	S	6	8	0.3	S	1	1	0.02	S	7	15	0.48	S	1	1	0.01	S	4	4	0.36		0	0	0	S	4	7	0.52	S	1	1	0	S	4	7	0.49	S	3	5	0.03
57697	FANCM	S	1	1	0.009	S	2	2	0	S	3	5	0.02	S	2	2	0.004	S	3	4	0.03	A	1	1	0	S	2	2	0.007		0	0	0	S	1	3	0	S	1	1	0	S	3	4	0.01		0	0	0
10791	VAMP5	S	1	1	1.9	S	1	1	0.89	S	1	1	2.2	S	1	1	1.2	S	2	2	2.4	S	1	1	1.8	S	1	3	2.9		0	0	0	S	1	1	1.8	S	1	1	1.2		0	0	0	S	1	1	1.9
23347	SMCHD1	S	1	1	0.006	S	1	2	0.001	S	1	1	0	A	1	1	0.006	R	1	1	0.003	R	1	1	0	S	3	3	0.03		0	0	0	S	3	3	0.02		0	0	0	S	1	1	0	S	1	1	0
23338	JADE2	R	1	1	0.04	S	1	1	0	S	2	3	0.07	S	1	1	0.008	S	2	3	0.08	S	1	1	0	S	1	1	0.08		0	0	0	S	1	2	0.03		0	0	0	S	2	2	0.1	S	2	2	0
284058	KANSL1	S	7	9	0.11	S	5	5	0.02	S	5	7	0.16	S	5	7	0.05	S	7	8	0.31	S	4	4	0.08	S	5	9	0.04	S	6	6	0	S	9	12	0.36	S	3	4	0.02	S	5	9	0.3	S	3	3	0.06
3854	KRT6B	S	17	33	1.2	S	37	97	8.9	S	16	35	5.5	S	16	39	0.17	S	11	16	1.4	S	18	54	0.67	S	8	13	5.4	S	17	27	0.21	S	6	12	3.8	S	16	37	5.4	S	16	31	4.5	S	20	48	0.48
1654	DDX3X	S	2	2	0.02	S	4	7	0.03	S	2	3	0.16	S	5	7	0.08	S	3	3	0.1	S	5	8	0.13	R	1	1	0.02	S	9	13	0.35	A	1	2	0	S	5	8	0.1	S	1	1	0.007	S	7	13	0.21
8850	KAT2B	A	1	1	0.07	S	3	4	0.02	S	2	3	0.04	S	3	4	0.13	S	3	3	0.18	S	3	4	0.1	A	1	1	0	S	6	8	0.11	S	2	2	0.08	S	2	3	0.03		0	0	0	S	3	4	0.06
4152	MBD1	S	3	4	0.22	S	2	4	0.08	S	1	1	0.09	S	2	2	0.11	S	2	2	0.13	S	2	4	0.1		0	0	0	S	3	6	0.23	S	2	2	0.09	S	1	1	0.02	S	1	1	0.07	S	2	3	0.04
57187	THOC2	S	2	3	0.01	S	2	4	0.002	R	1	1	0.01	S	3	4	0.01	S	1	1	0.02	S	3	5	0.02		0	0	0	S	2	2	0.005	S	1	1	0.02	S	3	5	0.003	S	1	1	0.007	S	3	6	0.003
81624	DIAPH3	S	1	1	0.16	S	1	1	0	S	1	2	0.17	S	2	2	0.06	S	1	1	0.16	S	1	1	0.08		0	0	0	S	1	2	0.02	S	1	2	0.14	S	1	1	0.05	S	1	1	0.18	S	1	1	0.07
161882	ZFPM1	S	2	2	0.07	S	1	3	0.004	S	1	2	0.13	S	3	3	0.03	R	1	1	0.05	S	2	2	0.02		0	0	0	S	2	2	0.01	S	2	7	0.2	S	2	3	0.02		0	0	0	S	2	2	0.007
23036	ZNF292	S	2	4	0.04	A	3	3	0	A	1	1	0.02	S	3	4	0	S	1	1	0.02	S	2	3	0.01		0	0	0	S	1	2	0.003	S	1	2	0.03		0	0	0	S	1	1	0.03	S	4	5	0.01
83746	L3MBTL2	S	2	3	0.44	S	3	3	0.07	S	1	2	0.15	S	2	3	0.15	S	2	3	0.37	S	3	3	0.18		0	0	0	S	3	3	0.12		0	0	0	S	3	3	0.13	S	1	2	0	S	2	4	0.09
51806	CALML5	S	1	3	0.22	S	2	2	0.13	S	1	2	0.1	S	1	2	0.07	S	1	2	0.14	S	1	1	0.13		0	0	0	S	1	1	0		0	0	0	S	1	3	0.04	S	1	2	0.17	S	1	2	0.1
7702	ZNF143	R	1	1	0.09	S	1	2	0	S	2	2	0.06	S	1	2	0	S	1	2	0.04	S	2	3	0.03		0	0	0	S	2	4	0.04		0	0	0	S	1	1	0.01		0	0	0	S	1	3	0
9441	MED26	R	1	3	0.06	S	2	2	0.07	S	1	2	0.11	S	1	4	0	S	1	1	0	S	5	7	0.12		0	0	0	S	8	11	0.24		0	0	0	S	4	5	0.11		0	0	0	S	6	7	0.1
84629	TNRC18	A	1	1	0	S	2	2	0.0007	S	1	1	0.005	R	1	1	0	R	1	1	0.01	S	2	3	0.007		0	0	0		0	0	0	S	1	1	0.008	S	4	8	0		0	0	0	S	5	9	0.02
8099	CDK2AP1	R	1	1	0.82	S	2	2	0.17	S	3	5	3.2	R	2	2	0	S	3	4	4.7	A	1	1	0.13	S	3	8	10.2	R	1	1	0	S	3	3	3.1	S	1	1	0.17	S	1	1	0.78	R	2	2	0.11
5886	RAD23A	R	2	2	1.1	S	2	2	0.89	S	2	2	0.85	S	3	4	1.3	S	2	3	0.18	A	1	1	0	A	1	1	0	A	1	1	0	S	3	4	0.19	S	4	7	0.02	A	1	1	0	S	3	5	0.92
22976	PAXIP1	S	6	6	0.23	S	1	2	0	S	6	7	0.16	S	5	8	0.06	S	3	5	0.08		0	0	0	S	4	4	0.14	S	1	1	0	S	4	4	0.17	S	5	5	0.04	S	6	9	0.3	S	5	6	0.1
2296	FOXC1	S	3	5	0.66	S	2	5	0.13	S	3	4	1.5	S	3	3	0.23	S	3	5	1.3		0	0	0	S	3	4	0.9	S	4	4	0.29	S	1	1	0.35	S	2	5	0.17	S	3	3	0.9	S	2	2	0.13
55663	ZNF446	S	1	1	0.61	A	2	3	0.07	S	2	3	0.56	A	1	1	0.03	S	2	2	0.6		0	0	0	S	2	2	0.75	S	1	1	0.17	S	1	2	0.32	S	1	1	0.07	S	2	2	0.63	A	1	1	0.04
154810	AMOTL1	S	3	6	0.1	S	1	1	0.003	S	2	4	0.08	S	1	2	0.02	S	3	5	0.13		0	0	0	S	3	4	0.1	S	1	2	0.003	S	4	6	0.17	S	1	1	0.006	S	3	6	0.12		0	0	0
7541	ZBTB14	S	5	7	0.94	S	2	2	0.04	S	3	4	0.19	S	2	2	0.09	S	3	4	0.24		0	0	0	S	3	5	0.92	R	2	2	0.03	S	4	5	0.66	S	2	2	0.08	S	4	5	0.7		0	0	0
3164	NR4A1	A	1	1	0.04	R	1	1	0	S	2	4	0.17	A	1	2	0	S	2	8	0.14		0	0	0	R	1	1	0	S	2	5	0.04		0	0	0	S	1	1	0		0	0	0	A	1	1	0
84172	POLR1B	S	5	6	0.09	S	1	1	0.008	S	4	5	0.17	A	1	1	0.03	S	2	5	0.05		0	0	0	S	4	5	0.11		0	0	0	S	6	8	0.27	S	2	2	0	S	5	10	0.14	S	1	1	0
22870	PPP6R1	S	1	1	0.05	R	1	1	0	S	1	1	0.06	S	1	1	0.03	S	2	3	0.08		0	0	0	S	2	2	0.07		0	0	0	S	2	2	0.07		0	0	0	S	2	4	0.09		0	0	0
3851	KRT4	S	4	4	0.15	S	6	23	2.1	S	2	5	0.03	S	6	8	0.15	A	2	3	0	S	19	46	4.9	A	2	3	0	S	12	22	2.3	A	1	1	0	S	7	10	0.19	S	5	7	4.5	S	10	17	0.94
5423	POLB	S	4	7	2.6	S	14	24	2.4	S	3	9	2.2	S	15	35	5.1		0	0	0	S	11	18	3.5	S	5	9	3.5	S	14	22	3.4	S	3	5	0.48	S	13	15	2.8	S	3	6	2.4	S	10	21	2.5
112950	MED8	S	1	2	0.03	S	2	4	0.08	S	1	3	0.09	S	2	3	0.5		0	0	0	S	2	5	0.03	S	1	3	0	S	3	3	0.37	S	1	1	0.05	S	2	4	0	S	1	4	0.09	S	3	5	0.09
57508	INTS2	S	3	5	0.04	S	3	3	0.06	S	1	2	0.06	S	4	5	0.09		0	0	0	S	5	8	0.12	S	2	4	0.05	S	6	7	0.07	S	2	3	0.07	S	3	5	0.1	S	3	4	0.08	S	4	7	0.15
27153	ZNF777	S	4	6	0.08	S	2	4	0.02	R	1	1	0.04	S	1	1	0.02		0	0	0	S	1	2	0	A	1	1	0.02	S	1	1	0	S	3	3	0.06	S	3	5	0.01	S	2	2	0.01	S	1	1	0
3064	HTT	S	1	2	0.61	S	1	4	1.5	S	1	3	5.3	S	1	4	2.5		0	0	0	S	1	4	3	R	1	1	4.9	S	1	4	1.4	S	1	4	4.5	S	1	4	2.7	S	1	5	5.4	R	1	3	2.7
8085	KMT2D	S	4	6	0.004	S	4	5	0.005	S	7	8	0.07	S	9	11	0.05		0	0	0	A	1	1	0.004	R	1	1	0.002	A	1	1	0.003	S	1	1	0.001	S	2	4	0.002	S	8	13	0.04	S	10	14	0.03
197407	ZNF48	S	1	3	0.32	S	3	5	0.11	S	1	2	0.1	S	3	4	0.17		0	0	0	S	3	4	0.19	S	2	2	0.42	S	3	4	0.18	S	1	1	0.04	S	4	7	0.26	S	2	4	0.29	S	3	3	0.03
6046	BRD2	A	1	1	0	S	3	3	0.04	S	2	2	0.28	S	5	5	0.11		0	0	0	S	5	6	0.14	S	1	1	0.08	S	2	2	0.03	S	1	1	0	S	3	4	0.03	S	1	1	0	S	4	9	0.13
84364	ARFGAP2	S	1	1	0	S	5	8	0.13	A	1	1	0.07	S	4	5	0.04		0	0	0	S	4	9	0.23	S	2	3	0.11	S	7	11	0.29		0	0	0	S	3	4	0.14		0	0	0	S	8	18	0.5
904	CCNT1	S	1	1	0.19	S	4	4	0.2	R	1	1	0.16	S	2	2	0		0	0	0	S	2	4	0.1	R	1	2	0.1	S	3	3	0.05		0	0	0		0	0	0		0	0	0	S	6	9	0.17
9705	ST18	R	1	1	0.05	S	1	2	0.03	S	1	2	0.06	A	1	1	0.03		0	0	0	A	1	2	0.05	S	1	3	0.04		0	0	0	S	1	4	0.04	S	1	1	0.03		0	0	0		0	0	0
3728	JUP	S	2	2	0.02	S	9	18	0.3	S	1	1	0.09	S	1	3	0.05		0	0	0	S	5	9	0.15		0	0	0	S	2	2	0.05	S	1	2	0.01	S	2	2	0.03	S	3	6	0.59	S	6	7	0.05
22803	XRN2	S	2	2	0.09	S	2	2	0.03	A	1	1	0.06	S	3	4	0.04		0	0	0	S	5	6	0.02		0	0	0	S	2	2	0.02	S	1	1	0	S	2	3	0.04		0	0	0	R	4	4	0.11
2960	GTF2E1	S	1	1	0.1	S	1	1	0.02	S	2	3	0.15	S	2	2	0.1		0	0	0	S	2	2	0.08		0	0	0	S	3	3	0.11		0	0	0	S	2	4	0.08		0	0	0	S	2	2	0.02
79577	CDC73	S	1	3	0.04	S	1	1	0	S	1	1	0.04	S	1	2	0.02		0	0	0	S	1	1	0.02		0	0	0	S	1	3	0.02		0	0	0		0	0	0		0	0	0	S	1	3	0
4298	MLLT1	S	1	1	0.29	S	2	3	0.17	S	1	1	0.44	S	1	1	0.26		0	0	0	S	2	2	0		0	0	0		0	0	0	S	1	1	0.32		0	0	0		0	0	0	S	2	2	0.14
55526	DHTKD1	R	1	1	0.2	R	1	2	0.09	R	1	1	0.09	A	1	1	0.005		0	0	0		0	0	0	R	1	1	0.28	S	1	2	0.29	S	1	1	0.13		0	0	0		0	0	0	R	1	1	0.23
8906	AP1G2	R	1	2	0.14	S	1	1	0	R	1	1	0.89	A	1	1	0.2		0	0	0		0	0	0		0	0	0		0	0	0	S	1	1	1	S	1	1	0	S	1	1	0.75	S	2	2	0.03
400569	MED11	A	1	1	0	R	1	1	0	S	2	3	1.8	R	1	1	0		0	0	0		0	0	0		0	0	0		0	0	0	S	1	1	0.11		0	0	0		0	0	0		0	0	0
10499	NCOA2	R	1	1	0	S	1	1	0	A	2	2	0.04	S	2	6	0.02		0	0	0		0	0	0		0	0	0		0	0	0		0	0	0		0	0	0		0	0	0	S	2	2	0
6256	RXRA	R	1	1	0	S	3	3	0.24	S	2	2	0.62	R	1	1	0.07	S	4	5	0.67	S	1	1	0.22	A	1	2	0	S	7	7	0.53	S	3	3	0.39	S	2	2	0.21	S	2	3	0.51	S	4	5	0.49
5094	PCBP2	S	2	2	0.16	S	6	7	0.68	S	1	1	0.68	A	2	4	0	S	1	1	0.17	S	6	12	2.2	S	3	3	0.6	S	5	6	0.63	S	2	2	0.18	S	3	5	0.25	S	1	1	0.11	S	7	12	2.8
2648	KAT2A	S	3	3	0.34	R	1	1	0.02	S	6	7	1.1	A	1	1	0	S	5	5	0.81	S	1	2	0.09	S	4	4	0.72	S	4	4	0.18	S	9	10	1.1	S	1	1	0.09	S	5	9	0.48	A	1	1	0.02
84617	TUBB6	S	8	42	56.5	S	9	58	19.7	S	8	41	0.87	A	6	62	0	S	10	67	1.2	S	7	80	29.1	S	9	56	76	S	10	42	38.4	S	9	65	55.4	A	6	54	0	S	7	57	0.48	S	8	75	0.09
3872	KRT17	S	10	11	14.8	S	28	62	9.4	S	9	12	6.7	A	8	11	0	S	6	7	1.4	S	14	25	0.31	A	6	10	0	S	13	16	0.18	A	4	6	0	S	9	17	1.6	S	7	14	6.7	S	12	21	0.11
2810	SFN	R	1	2	0.17	S	2	4	0.09	R	1	1	0.21	A	3	5	0	A	1	1	0.19	A	2	7	0		0	0	0	A	2	7	0		0	0	0	A	2	6	0	A	1	1	0	S	4	8	0.53
5434	POLR2E	S	3	5	1	S	2	3	0.1	S	4	7	1.3		0	0	0	S	3	8	0.89	S	3	4	0.3	S	3	3	1.1	S	2	2	0.37	S	3	7	1.6	S	3	4	0.38	S	2	6	0.94	S	3	5	0.34
51231	VRK3	S	2	2	0.46	S	1	1	0.04	S	3	6	1.6		0	0	0	S	4	9	1.8	S	1	1	0.07	S	7	9	3.9	S	2	2	0.08	S	3	7	2.1	S	4	5	0.11	S	3	3	1.9	S	2	3	0.08
6634	SNRPD3	R	1	1	0.28	S	1	2	0.12	S	1	2	0.9		0	0	0	S	1	1	0.84	S	1	1	0.19	S	2	2	2.5	S	1	1	0.2	S	1	1	0.93	S	1	1	0.26	S	1	1	0.93	S	1	2	0
861	RUNX1	S	1	1	0.2	S	1	1	0.08	S	1	1	0.3		0	0	0	S	1	3	0.39	S	1	1	0	S	2	2	0.55	R	1	1	0.05	S	1	2	0.35	S	1	1	0.04	S	2	3	0.42		0	0	0
222229	LRWD1	S	7	16	1.5	S	2	3	0.04	S	5	19	1		0	0	0	S	6	16	1.1	S	3	4	0.07	S	6	18	1.8	S	2	2	0.03	S	6	14	0.75		0	0	0	S	6	13	1.3	S	1	1	0
162979	ZNF296	S	1	2	0.05	S	2	3	0.06	S	1	4	0		0	0	0	S	1	1	0	A	1	1	0	S	1	2	0	R	2	2	0.25		0	0	0	S	1	1	0.15		0	0	0		0	0	0
221504	ZBTB9	S	2	2	0.41	R	1	1	0.02	S	1	1	0.1		0	0	0	S	1	1	0.1	S	1	1	0	S	1	2	0.12		0	0	0	S	1	1	0.08		0	0	0	S	1	1	0.08		0	0	0
79149	ZSCAN5A	S	2	2	0.18	R	1	1	0.02	S	1	2	0.07		0	0	0	S	1	2	0.06	S	1	1	0.02	A	1	1	0		0	0	0	S	1	2	0.06		0	0	0	S	1	3	0.06		0	0	0
4809	SNU13	S	1	1	0	S	1	1	0	R	1	1	0.2		0	0	0	S	1	2	0.28	A	1	1	0	S	1	3	0.36		0	0	0	S	1	2	0.26		0	0	0		0	0	0		0	0	0
4999	ORC2	A	1	1	0.21	R	1	2	0	S	1	1	0.13		0	0	0	R	2	3	0.26		0	0	0	R	2	2	0.36	R	1	1	0.07	S	2	2	0.27		0	0	0		0	0	0		0	0	0
55131	RBM28	R	1	1	0.03	S	1	4	0.004	S	2	2	0.06		0	0	0	R	1	1	0.02		0	0	0	S	2	3	0.04	R	1	1	0		0	0	0		0	0	0		0	0	0	S	1	1	0.003
56159	TEX11	A	1	1	0.68	A	1	1	0.03	A	1	1	0.46		0	0	0	A	1	1	0.45		0	0	0	R	2	2	0.6		0	0	0	S	1	1	7.2	S	1	1	0.35		0	0	0		0	0	0
144108	SPTY2D1	R	1	1	0.06	R	1	1	0	R	1	2	0.03		0	0	0	R	1	1	0.02		0	0	0	A	2	2	0.13		0	0	0	S	2	4	0.12		0	0	0	S	1	1	0.03	R	1	1	0.01
2802	GOLGA3	A	1	1	0.42	A	1	1	0	A	1	1	0.03		0	0	0		0	0	0	A	2	2	0.04	A	1	2	0		0	0	0		0	0	0		0	0	0	S	1	1	0		0	0	0
152485	ZNF827	S	1	3	0.03	S	1	1	0	S	1	1	0		0	0	0		0	0	0		0	0	0	S	1	2	0.03		0	0	0		0	0	0		0	0	0	S	2	2	0.03	S	2	3	0
55311	ZNF444	S	1	2	0.15	S	1	3	0.05	R	1	3	0.08		0	0	0		0	0	0		0	0	0		0	0	0	S	2	2	0.05	S	1	1	0		0	0	0		0	0	0		0	0	0
27316	RBMX	S	9	15	5.6	S	19	34	4.7	S	5	10	6.3	S	16	33	8	S	6	11	6.4	S	21	39	8.8	S	9	14	11.6	S	19	30	6.7	S	8	11	6.6	S	18	40	5.3	S	6	11	6.7	S	18	25	5.2
5499	PPP1CA	S	2	2	0.1	S	4	7	0.17	S	1	4	0.13	S	3	6	0.15	S	1	2	0.08	S	3	6	0.04	S	3	4	0.93	S	5	8	0.4	S	1	1	0.09	S	2	6	0.1		0	0	0	S	3	7	0.14
5500	PPP1CB	S	2	2	0.1	S	2	10	0.06	S	1	4	0.12	S	3	7	0.26	S	1	2	0.08	S	3	9	0.24	S	1	1	0.25	S	5	8	0.48		0	0	0	S	3	8	0.23		0	0	0	S	3	9	0.14
7529	YWHAB	S	2	3	0.22	S	3	5	0.15	R	1	1	0.06	S	4	6	0.08	A	1	1	0.05	S	3	8	0.1	S	2	3	0.11	A	2	7	0	S	1	1	0.04	S	3	7	0.19	A	1	1	0	S	5	9	0.65
374454	KRT77	S	4	12	3	S	5	23	3.4	A	3	19	0	S	5	14	1.8	S	4	15	2.1	S	4	23	6.4	A	3	10	0	S	3	11	3.5	A	2	7	0	S	4	13	0.95	A	3	10	0	S	7	23	0.94
10492	SYNCRIP	S	4	4	0.74	S	5	6	0.16		0	0	0	S	4	6	0.38	S	1	3	0.11	S	2	2	0.18	S	1	2	0.49	S	8	12	0.43	S	1	2	0.33	S	4	6	0.16	S	1	2	0.29	S	4	5	0.13
57684	ZBTB26	S	4	4	1.4	S	2	3	0		0	0	0	S	1	2	0.07	S	2	3	0.35	S	3	4	0.12	S	2	6	0.51	S	1	1	0	S	3	4	0.4	S	3	4	0.08	S	4	5	0.5	S	1	1	0.07
400506	KNOP1	S	2	3	0.23	S	3	5	0.11		0	0	0	S	2	7	0.04	S	2	2	0.19	S	3	4	0.19	S	1	5	0.12	S	4	6	0.21	S	2	2	0.14	S	3	4	0.12	S	2	4	0.21	S	2	5	0.04
4069	LYZ	S	1	1	0	S	4	7	0.3		0	0	0	S	2	3	0.02	S	2	4	0.12	S	2	2	0.84	S	1	1	0.21	S	1	1	0	S	1	2	0.51	S	4	5	0.36	S	1	1	0.51	S	1	1	0.1
2962	GTF2F1	S	1	1	0.09	S	1	1	0.06		0	0	0	S	2	5	0.1	S	1	1	0	S	2	3	0.07	S	1	4	0.14	S	1	3	0.03	S	1	2	0.09	S	1	3	0	S	1	1	0	S	1	2	0
5725	PTBP1	S	4	5	0.61	S	11	24	1.3		0	0	0	S	11	37	2.8	R	1	1	0.13	S	12	41	4.2	S	4	5	1.3	S	9	26	3	S	2	3	0.27	S	10	29	2.1	S	2	4	0.43	S	13	56	3.2
27063	ANKRD1	S	1	1	0.18	S	1	1	0.03		0	0	0	S	1	1	0.05	S	1	2	0.28	S	1	1	0.06	S	1	1	0.3	R	1	1	0	S	1	1	0.28	S	1	1	0.05	S	1	1	0.38	S	1	1	0.05
151636	DTX3L	S	2	2	0.07	S	6	6	0.01		0	0	0	S	6	7	0.2	S	5	14	0.2	S	8	8	0.28	S	5	8	0.22	S	5	5	0.01	S	4	5	0.33	S	4	8	0.08	S	2	2	0.09	S	5	5	0.07
5518	PPP2R1A	R	1	3	0.16	S	2	2	0.07		0	0	0	S	1	2	0.11	S	1	2	0.05	S	3	5	0.17	S	1	1	0.16	S	4	5	0.16	S	1	2	0.1	S	2	3	0.1	S	1	2	0.13	S	2	4	0.03
4691	NCL	A	1	1	0.02	S	3	5	0.03		0	0	0	S	5	8	0.06	S	1	2	0	S	4	5	0.05	R	1	1	0.09	S	5	9	0.1	S	2	2	0.13	S	4	5	0.09	S	3	3	0.17	S	3	5	0.08
79968	WDR76	S	2	3	0.11	S	5	7	0.1		0	0	0	S	3	4	0.11	S	1	1	0	S	5	5	0.22	S	2	3	0.47	S	5	5	0.55	S	1	1	0.08	S	5	6	0.28		0	0	0	R	1	1	0.05
6907	TBL1X	S	2	5	0.36	S	3	5	0		0	0	0	S	1	5	0.23	R	1	3	0	S	3	4	0.15	S	1	4	0.91	S	3	6	0.14	S	1	2	0.3	S	1	4	0.07		0	0	0		0	0	0
2969	GTF2I	R	3	3	0.09	S	28	49	1.5		0	0	0	S	32	51	1.3	S	3	3	0.04	S	37	54	3.4	S	14	17	1.3	S	27	39	0.58		0	0	0	S	27	37	1.6		0	0	0	S	39	83	7.1
6637	SNRPG	S	1	1	0.28	S	1	1	0		0	0	0	S	1	1	0	A	1	1	0.24	S	1	1	0.2	S	1	1	0.48		0	0	0	S	1	1	0.4	S	1	1	0	S	1	1	0.1	A	1	1	0
56098	PCDHGC4	R	1	1	0.03	A	1	1	0		0	0	0	A	1	1	0	A	1	1	0.06	R	1	2	0.07		0	0	0	A	1	1	0.01	S	1	1	0.08	S	1	1	0.04	S	1	1	0.09	R	1	2	0.03
79685	SAP30L	S	1	1	0.21	S	1	3	0.05		0	0	0	S	1	1	0.17	A	1	1	0.18	S	1	3	0.15		0	0	0	S	2	2	0.11	S	1	1	0.15	S	1	1	0		0	0	0	S	1	2	0.09
5432	POLR2C	R	1	2	0.13	S	1	1	0.08		0	0	0	S	3	3	0.47	A	1	1	0.09	S	1	1	0.12		0	0	0	S	1	1	0.11		0	0	0	S	2	4	0.2	S	1	1	0.13	S	2	2	0.19
55726	ASUN	S	2	3	0.12	S	4	8	0.1		0	0	0	S	4	4	0.12	S	1	1	0.02	S	4	5	0.11		0	0	0	S	4	4	0.24		0	0	0	S	3	4	0.08		0	0	0	A	2	2	0.02
2597	GAPDH	S	1	1	0.1	S	2	5	0.11		0	0	0	S	1	3	0.04	S	1	1	0	S	1	5	0.13		0	0	0	S	4	6	0.14		0	0	0	S	1	3	0.06		0	0	0	S	1	3	0.16
388698	FLG2	S	2	2	0.01	S	2	5	0.002		0	0	0	S	2	3	0	S	2	2	0.02	S	1	3	0.002		0	0	0	S	1	1	0		0	0	0		0	0	0		0	0	0		0	0	0
63925	ZNF335	S	1	1	0	S	3	3	0.004		0	0	0	S	1	1	0	S	1	1	0.03	S	1	1	0		0	0	0		0	0	0	S	1	1	0	S	2	2	0.008	S	2	4	0.09	R	1	1	0.009
84444	DOT1L	R	1	1	0.11	A	1	1	0.06		0	0	0	A	1	1	0.09	A	1	1	0.11	A	1	1	0.15		0	0	0		0	0	0	S	1	1	0.11		0	0	0	S	1	1	0.006		0	0	0
10401	PIAS3	R	1	1	0.12	A	1	1	0		0	0	0	S	1	1	0	S	1	1	0	S	1	1	0		0	0	0		0	0	0		0	0	0		0	0	0		0	0	0	S	1	1	0
7029	TFDP2	S	2	3	0.19	S	1	2	0		0	0	0	S	3	3	0.02	R	1	1	0.13		0	0	0	S	2	5	0.3	S	3	5	0.08	S	2	6	0.51	A	1	3	0	S	1	5	0.39	S	1	2	0
55568	GALNT10	S	1	1	0.58	A	1	1	0.1		0	0	0	R	1	2	0	R	1	1	1.1		0	0	0		0	0	0	A	1	1	0	S	1	1	1.3	S	1	1	0.1	S	1	1	0.99	R	1	1	0.11
23512	SUZ12	S	3	3	0.15	S	5	7	0.06		0	0	0	S	2	2	0.05		0	0	0	S	3	4	0.07	R	1	1	0.05	S	7	11	0.16	S	1	1	0.03	S	5	5	0.07	S	1	1	0.02	S	5	9	0.08
55601	DDX60	S	2	3	0.02	S	2	4	0		0	0	0	S	4	6	0.01		0	0	0	S	4	4	0.008	S	2	2	0.04	S	5	6	0.05	S	1	2	0.02	S	5	5	0.009	S	2	2	0.04	S	5	5	0.01
57117	INTS12	S	2	4	0.42	S	3	6	0.37		0	0	0	S	3	8	0.38		0	0	0	S	2	5	0.12	S	1	2	0.34	S	3	6	0.52	S	1	1	0.22	S	2	5	0.11	S	2	3	0.31	S	3	7	0.36
11056	DDX52	S	2	2	0.05	S	1	2	0.04		0	0	0	A	1	1	0.05		0	0	0	S	1	3	0.08	S	2	3	0.09	S	4	9	0.19	S	1	2	0.08	S	2	4	0.08	S	2	2	0.1	S	2	3	0.15
23774	BRD1	R	1	1	0	S	4	5	0.02		0	0	0	S	2	2	0.01		0	0	0	S	2	2	0.01	S	1	1	0.01	S	2	3	0	S	1	1	0.01	S	1	1	0.009	S	2	2	0	S	3	4	0.03
10657	KHDRBS1	A	1	1	0.32	S	5	8	1.4		0	0	0	S	6	8	2.8		0	0	0	S	6	12	4.9	A	2	2	1.9	S	5	8	2	S	1	2	0.41	S	2	2	0.72	S	1	1	0.25	S	6	15	4.2
23122	CLASP2	S	1	2	0.009	S	7	10	0.03		0	0	0	S	3	4	0		0	0	0	S	5	7	0.07	S	6	10	0.18	S	7	10	0.07	S	1	1	0.01	S	4	6	0.02		0	0	0	S	21	28	0.41
140735	DYNLL2	R	2	2	1.5	S	2	3	0.38		0	0	0	S	3	4	1.3		0	0	0	S	4	6	1.1	S	1	2	0.49	S	2	4	1.1	S	1	2	0	S	4	4	0.47		0	0	0	S	3	3	0.46
55193	PBRM1	S	2	2	0.03	R	1	1	0		0	0	0	S	8	11	0.06		0	0	0	S	5	8	0.08	S	2	2	0.07	S	5	6	0.008		0	0	0	S	5	6	0.03	S	1	1	0	S	8	9	0.13
10001	MED6	R	1	3	0.2	S	1	3	0		0	0	0	S	2	3	0.38		0	0	0	S	2	3	0.14	R	1	1	0.16	S	2	4	0.17		0	0	0	S	1	3	0.13	S	1	2	0.19	S	1	3	0.05
54934	KANSL2	R	1	1	0	A	1	1	0		0	0	0	S	1	2	0.02		0	0	0	S	1	2	0.01	S	2	2	0.11	S	2	4	0.05		0	0	0	S	1	1	0.01	S	1	3	0.04	S	1	1	0
57864	SLC46A2	A	1	2	1	A	1	1	0.21		0	0	0	A	1	2	0.28		0	0	0	R	1	5	0.03	R	1	1	0.08	A	1	1	0.22		0	0	0	S	1	4	0.45	S	1	2	0.08	A	1	2	0.01
125950	RAVER1	S	1	2	0.04	S	5	12	0.25		0	0	0	S	3	18	0.06		0	0	0	S	4	15	0.3	S	2	2	0.05	S	11	15	0.73		0	0	0	S	4	10	0.08		0	0	0	S	5	24	0.29
8939	FUBP3	R	2	2	0.28	S	4	6	0.06		0	0	0	S	5	8	0.16		0	0	0	S	4	6	0.15	R	1	2	0.14	S	7	7	0.15		0	0	0	S	4	6	0.2		0	0	0	S	6	8	0.26
10992	SF3B2	R	1	2	0.05	R	1	1	0.02		0	0	0	R	2	2	0.04		0	0	0	S	3	3	0.08	A	1	1	0.05	R	2	3	0.02		0	0	0	S	2	3	0.03		0	0	0	S	4	6	0.13
23020	SNRNP200	A	1	1	0.008	A	1	1	0		0	0	0	S	3	3	0.2		0	0	0	S	2	4	0.01	R	1	1	0	S	4	4	0.1		0	0	0	S	2	3	0.02		0	0	0	S	5	6	0.25
23248	RPRD2	A	1	1	0.01	S	7	10	0.16		0	0	0	S	6	6	0.02		0	0	0	S	11	15	0.17	S	1	2	0.03	S	13	16	0.08		0	0	0	S	6	11	0.02		0	0	0	S	18	23	0.46
23506	GLTSCR1L	R	1	1	0.07	A	1	1	0		0	0	0	A	2	2	0.05		0	0	0	S	1	1	0.02	R	1	1	0.19	S	1	1	0.02		0	0	0		0	0	0		0	0	0	S	1	1	0
9817	KEAP1	R	1	2	0.15	S	1	1	0.02		0	0	0	S	1	1	0		0	0	0	S	2	2	0	S	1	1	0.23		0	0	0		0	0	0	S	1	1	0		0	0	0	A	1	1	0
5395	PMS2	A	1	1	0	S	1	1	0.01		0	0	0	S	1	2	0		0	0	0	S	2	6	0.03	S	1	1	0.008		0	0	0		0	0	0	S	1	3	0		0	0	0	S	5	10	0.13
9991	PTBP3	A	1	1	0	S	6	10	0.09		0	0	0	S	5	8	0.08		0	0	0	S	6	13	0.2	A	1	2	0	S	7	9	0.07		0	0	0	S	5	6	0.06		0	0	0	S	10	21	0.31
6605	SMARCE1	S	1	1	0.03	S	1	1	0		0	0	0	S	1	1	0		0	0	0	S	1	1	0.03		0	0	0	S	1	2	0.02	S	1	1	0	S	1	1	0.01	S	1	1	0.02		0	0	0
1500	CTNND1	S	1	2	0.02	S	2	3	0.008		0	0	0	R	3	3	0		0	0	0	S	3	6	0.06		0	0	0	S	4	7	0.01	S	1	1	0.01	S	1	2	0		0	0	0	S	6	9	0.06
219541	MED19	S	2	2	0.18	S	2	7	0		0	0	0	S	2	7	0.36		0	0	0	R	1	1	0.06		0	0	0	S	2	5	0.32		0	0	0	S	2	3	0	S	1	5	0.68	S	2	10	0.2
4929	NR4A2	S	2	2	0.18	R	1	3	0.007		0	0	0	A	2	2	0		0	0	0	R	1	2	0		0	0	0	S	1	3	0.01		0	0	0	S	1	1	0.007	S	1	1	0.15	S	3	5	0.009
3836	KPNA1	S	2	2	0.15	S	1	2	0		0	0	0	S	1	3	0.03		0	0	0	S	3	3	0.03		0	0	0	S	3	4	0.07		0	0	0	S	3	4	0.02		0	0	0	S	3	5	0.03
51193	ZNF639	R	1	1	0.14	S	4	5	0.07		0	0	0	R	2	2	0.19		0	0	0	S	3	5	0.02		0	0	0	S	1	2	0.06		0	0	0	S	3	4	0.18		0	0	0	S	3	3	0.06
51428	DDX41	R	1	1	0.06	S	3	4	0.03		0	0	0	S	2	2	0		0	0	0	S	3	5	0.05		0	0	0	S	4	4	0.06		0	0	0	S	2	3	0.06		0	0	0	S	4	9	0.13
4209	MEF2D	R	1	1	0.14	A	1	1	0		0	0	0	R	1	1	0		0	0	0	S	3	3	0.14		0	0	0	R	2	2	0.15		0	0	0	S	1	1	0.08		0	0	0	S	1	1	0.1
301	ANXA1	R	1	1	0.03	A	1	1	0		0	0	0	S	1	3	0		0	0	0	S	9	20	1		0	0	0	S	10	14	0.67		0	0	0	S	4	4	0.13		0	0	0	S	5	7	0.08
91179	SCARF2	S	1	1	0.33	R	2	3	1		0	0	0	R	1	1	0.09		0	0	0	R	1	2	0.11		0	0	0		0	0	0		0	0	0		0	0	0		0	0	0	R	1	1	0.05
29894	CPSF1	A	1	1	0.41	S	2	2	0.007		0	0	0	S	2	3	0.01		0	0	0	S	2	2	0.01		0	0	0		0	0	0		0	0	0		0	0	0		0	0	0	S	2	2	0.01
11234	HPS5	S	1	1	0.08	R	1	1	0.03		0	0	0	R	1	1	0		0	0	0	R	1	2	0.03		0	0	0		0	0	0		0	0	0		0	0	0		0	0	0		0	0	0
51523	CXXC5	S	1	2	0	S	2	3	0.14		0	0	0	S	2	3	0.11		0	0	0		0	0	0	S	1	9	1	S	2	3	0.22	S	2	2	1.5	S	2	3	0.28	S	1	1	1.1	R	1	1	0.05
7220	TRPC1	A	1	1	0.1	S	1	1	0.08		0	0	0	R	1	1	0.07		0	0	0		0	0	0	R	1	1	0.08	A	1	1	0.09	S	1	2	0.02	S	1	1	0.05		0	0	0	R	1	1	0.05
55907	CMAS	S	1	2	0.1	S	3	5	0.13		0	0	0	S	1	2	0		0	0	0		0	0	0		0	0	0	S	4	6	0.28	S	1	1	0	S	2	3	0.06		0	0	0	S	3	5	0.04
51270	TFDP3	S	1	2	0.46	S	1	1	0.05		0	0	0	S	1	2	0		0	0	0		0	0	0		0	0	0		0	0	0	S	1	1	0.65	S	1	1	0.01	S	1	2	0.79	S	1	2	0.01
155061	ZNF746	R	1	1	0	A	1	1	0		0	0	0	S	1	1	0		0	0	0		0	0	0		0	0	0		0	0	0		0	0	0		0	0	0		0	0	0		0	0	0
2101	ESRRA	S	2	6	0.64	S	2	4	0.06		0	0	0	S	1	2	0.03	S	1	1	0.18	S	1	2	0.01	S	3	7	1.1	S	4	5	0.16	S	3	6	0.97	S	1	4	0.04	S	3	11	1.1	S	1	2	0.02
56893	UBQLN4	S	3	3	0.85	A	1	1	0.04		0	0	0	A	1	1	0		0	0	0	A	1	1	0.14		0	0	0	A	1	2	0.11	A	1	1	0	S	1	1	0.07		0	0	0	A	1	1	0.07
54870	QRICH1	S	1	1	0.06	R	1	1	0		0	0	0		0	0	0	S	2	3	0.15	S	2	4	0.03	S	1	1	0.15	S	1	1	0		0	0	0	S	1	2	0.02	S	2	3	0.01	S	1	2	0.02
55791	LRIF1	S	1	1	0	A	1	1	0		0	0	0		0	0	0	S	3	3	0.04		0	0	0	S	2	4	0.01	S	2	2	0.01		0	0	0		0	0	0		0	0	0		0	0	0
28974	C19orf53	S	1	1	0.86	S	1	1	0		0	0	0		0	0	0		0	0	0	S	1	1	0.34	S	1	2	1.4	S	1	1	0.18	S	1	1	1.4	S	1	2	0.14	S	1	1	0.99	S	1	1	0
286826	LIN9	S	1	2	0.32	S	1	3	0		0	0	0		0	0	0		0	0	0	R	1	1	0	S	3	6	0.36	S	1	1	0	S	2	3	0.23		0	0	0	S	2	2	0.13		0	0	0
9557	CHD1L	A	1	1	0.09	S	1	1	0		0	0	0		0	0	0		0	0	0	S	1	2	0.02		0	0	0	S	1	1	0		0	0	0	S	1	2	0.01		0	0	0		0	0	0
57576	KIF17	R	1	1	0.14	S	1	1	0.03		0	0	0		0	0	0		0	0	0	S	1	1	0.24		0	0	0		0	0	0		0	0	0	S	1	1	0.03		0	0	0	S	1	1	0.27
85416	ZIC5	S	1	2	0.5	S	1	1	0.02		0	0	0		0	0	0		0	0	0		0	0	0	S	1	2	0.91	S	1	3	0.14	S	1	2	0.69		0	0	0	S	2	5	0.73		0	0	0
4287	ATXN3	A	1	3	0.9	A	1	1	0.21		0	0	0		0	0	0		0	0	0		0	0	0	A	1	1	1.3		0	0	0	S	1	2	0	S	1	1	0.3	S	1	1	0.93		0	0	0
9321	TRIP11	A	1	1	0.05	A	1	1	0.03		0	0	0		0	0	0		0	0	0		0	0	0	A	1	1	0.02		0	0	0	S	1	1	0.02		0	0	0	S	1	1	0.02	S	4	4	0.01
80000	GREB1L	S	1	1	0.01	S	1	3	0		0	0	0		0	0	0		0	0	0		0	0	0		0	0	0	A	1	1	0		0	0	0		0	0	0	S	2	4	0.07	S	9	11	0.03
1767	DNAH5	A	1	1	0.007	R	2	2	0.01		0	0	0		0	0	0		0	0	0		0	0	0		0	0	0	S	1	1	0		0	0	0		0	0	0		0	0	0		0	0	0
10924	SMPDL3A	R	1	1	0.37	S	1	1	0.09		0	0	0		0	0	0		0	0	0		0	0	0		0	0	0		0	0	0	S	1	2	0.19	S	1	1	0.07	S	1	1	0.08	R	1	1	0
6894	TARBP1	A	1	1	0.009	S	1	1	0		0	0	0		0	0	0		0	0	0		0	0	0		0	0	0		0	0	0		0	0	0	S	1	1	0		0	0	0	S	1	2	0.003
9665	KIAA0430	A	1	1	0.31	A	1	1	0.09		0	0	0		0	0	0		0	0	0		0	0	0		0	0	0		0	0	0		0	0	0		0	0	0	S	1	1	0.02		0	0	0
170463	SSBP4	S	3	3	1.4	S	1	1	0.07	S	2	3	1.6	S	2	3	0.32	S	2	3	1.2	S	2	2	0.27	S	2	6	1.8	S	2	2	0.1	S	2	6	1.4	S	2	4	0.15	S	1	2	0	S	1	3	0.06
7403	KDM6A	S	6	9	0.08	S	3	3	0.007	S	6	9	0.12	S	8	9	0.09	S	3	3	0.01	S	1	2	0.02	S	4	5	0.1	A	1	1	0	S	3	3	0.05	S	3	3	0.02	S	6	12	0.22	S	2	3	0.005
2033	EP300	S	3	3	0.04	R	1	1	0	S	4	7	0.1	S	3	3	0.01		0	0	0		0	0	0	S	2	4	0.01		0	0	0		0	0	0		0	0	0	S	5	7	0.07	A	1	1	0
11011	TLK2	S	2	6	0.19	S	1	2	0	R	1	2	0.03		0	0	0	S	1	1	0.05	A	1	1	0	S	2	4	0.08	S	4	4	0.001	S	3	3	0.23		0	0	0		0	0	0	S	5	5	0
3320	HSP90AA1	S	3	4	0.17	S	2	3	0.01	S	1	1	0.06	S	4	6	0.1	S	3	3	0.19	S	2	3	0.1	S	3	4	0.32	S	4	6	0.09	S	2	3	0.1	A	2	3	0		0	0	0	S	8	12	0.38
5937	RBMS1	S	2	3	0.73	S	2	2	0.16	S	1	3	0.38	S	1	2	0.05	S	1	4	0.47	S	2	3	0.34	S	1	2	0.56	S	1	2	0.14	S	3	5	1.3	S	1	2	0.1	S	2	4	0.88	S	1	2	0.09
3326	HSP90AB1	S	3	4	0.19	S	2	3	0.01	S	1	1	0.07	A	2	3	0	A	2	2	0	A	1	2	0	A	2	2	0	S	3	6	0.13	A	1	1	0	S	3	4	0.16		0	0	0	S	9	16	0.49
7001	PRDX2	R	2	3	0.42	S	1	1	0.02		0	0	0	A	1	1	0.02		0	0	0		0	0	0		0	0	0	A	1	1	0.04		0	0	0		0	0	0	S	1	1	0.23		0	0	0
3310	HSPA6	S	9	32	14.3	A	8	23	0	S	8	24	8.8	S	8	23	12.4	S	10	36	15.4	S	9	20	5.6	S	8	24	19.4	S	7	15	5.7	S	8	23	10.3	S	9	18	8.4	S	8	24	12.6	S	8	19	3.8
7391	USF1	S	3	3	1.1	A	2	4	0	S	3	7	2.1	S	3	6	0.05	S	2	4	0.89	S	3	5	0.11	S	4	11	0.56	S	3	6	0.08	S	3	5	1	S	2	2	0.24	S	5	8	1.7	S	4	5	0.43
116447	TOP1MT	S	7	40	2.3	A	5	75	0	S	6	46	4.3	S	7	95	0.02	S	6	43	0.49	S	6	102	1.4	A	6	56	0	S	7	61	2	A	5	43	0	S	7	75	1.2	A	6	58	0	S	7	72	2
6597	SMARCA4	S	1	1	0.02	A	5	6	0	S	3	3	0.08	S	8	10	0.15	S	2	2	0.05	S	7	7	0.15	S	3	3	0.07	S	7	10	0.03	S	2	3	0.03	S	7	9	0.08	S	3	4	0.05	S	7	11	0.15
116931	MED12L	S	3	3	0.04	A	2	6	0	S	4	4	0.008	S	4	6	0.003	A	2	4	0	A	1	3	0	A	1	1	0	S	3	6	0.0007	A	1	1	0	S	2	2	0.002	S	3	4	0.01	S	4	4	0.06
7005	TEAD3	S	6	8	1.1	A	5	8	0	S	7	10	2.8	A	7	9	0	S	5	15	0.78	A	5	8	0	S	7	11	0.64	S	7	9	1.1	S	6	6	0.75	A	6	7	0	S	5	9	0.71	A	5	7	0
2000	ELF4	S	3	7	0.35	A	1	2	0	S	2	6	0.19	A	1	3	0	S	3	9	0.25	A	2	4	0	S	3	7	0.19	S	2	4	0.05	S	2	4	0.17	A	2	2	0	S	1	2	0.24	A	2	4	0
80205	CHD9	S	14	20	0.98	A	10	16	0	S	8	16	0.03	A	5	8	0	A	8	16	0	A	7	12	0	S	10	19	0.49	A	8	11	0	S	13	20	0.03	A	6	12	0	S	16	26	0.05	A	11	18	0
54799	MBTD1	S	1	1	0.22	A	1	1	0	S	1	2	0.2		0	0	0	S	2	2	0.18	S	3	3	0.11	S	1	3	0.26	S	3	3	0.13	S	1	2	0.19	A	1	1	0	S	1	1	0.17	S	1	1	0
5501	PPP1CC	S	2	2	0.05	A	1	3	0	S	1	4	0.13	A	2	5	0	S	1	2	0.08	A	2	5	0	A	1	1	0.04	S	3	5	0.04	S	1	1	0.08	S	2	5	0.06		0	0	0	A	1	3	0
10382	TUBB4A	S	14	63	96.5	A	15	95	0	A	11	67	0	S	16	101	3.3	A	13	96	0	S	16	124	54.1	S	16	90	103	S	17	73	64.6	S	17	99	88.2	A	14	78	0	S	15	85	0.68	A	16	121	0
6875	TAF4B	S	2	2	0.03	A	1	2	0	A	1	2	0	S	2	2	0.04	A	1	2	0	A	1	1	0	A	2	2	0.42	A	1	1	0	S	1	1	0.02	A	1	1	0		0	0	0	A	1	2	0
5017	OVOL1	S	2	2	0.56	A	1	1	0	A	1	2	0	S	3	6	0.25		0	0	0	A	2	4	0	S	3	5	0.95	S	2	2	0.19	S	3	3	1.8	S	1	3	0.07	A	1	1	0	A	1	2	0
7552	ZNF711	S	3	4	0.31	A	2	2	0	A	2	2	0	A	1	1	0	S	2	2	0.18	S	1	1	0		0	0	0	A	1	1	0	S	3	7	0.11	A	1	2	0	A	2	4	0	A	1	2	0
79776	ZFHX4	S	12	13	0.29	A	7	12	0	A	7	8	0	A	7	9	0	S	7	7	0.4	A	7	8	0	S	9	9	0.04	A	8	11	0	A	6	9	0	A	4	6	0	A	11	13	0	A	5	7	0
7942	TFEB	S	3	4	0.27	A	2	2	0	A	1	1	0	A	2	2	0	A	1	1	0		0	0	0	A	1	2	0		0	0	0	A	1	1	0	A	1	1	0	A	1	1	0	S	2	2	0.09
339230	CCDC137	S	1	3	0.16		0	0	0	S	2	4	1.3	S	5	7	0.91	S	2	5	0.26	S	2	3	0.23	S	2	6	0.41	S	3	7	0.68	S	1	2	0.33	S	3	8	0.5	S	2	6	0.59	S	3	3	0.06
84954	MPND	S	3	4	1.6		0	0	0	S	2	2	1.6	S	1	1	0.11	S	4	4	2.1	S	1	1	0.12	S	3	6	0.89	S	2	3	0.1	S	2	2	1.4	S	1	1	0.08	S	2	3	0.41	S	1	1	0.05
2521	FUS	A	1	1	0.07		0	0	0	R	2	2	0.006	S	1	1	0.08	A	1	1	0.07	R	1	1	0.04	A	1	1	0.14	R	1	1	0.15	S	1	2	0.18	S	2	2	0.07	S	1	1	0.09	S	2	2	0.08
51105	PHF20L1	S	4	9	0.11		0	0	0	S	3	3	0.11	S	2	2	0.008	S	3	5	0.13	S	1	1	0.01	S	5	6	0.2	S	1	1	0	S	4	5	0.27	S	1	3	0	S	5	7	0.31		0	0	0
89869	PLCZ1	S	2	3	0.38		0	0	0	A	1	1	0.39	S	2	3	2.8	R	1	3	0.76	R	2	3	1.4	S	2	3	2.2	R	1	3	0.02	S	2	6	3.9		0	0	0	S	2	3	4.8	A	2	2	1.4
23429	RYBP	S	1	2	0.35		0	0	0	R	1	1	0	S	1	5	0	R	1	2	0	S	1	3	0	R	1	3	0.73	S	1	5	0	S	1	4	0		0	0	0		0	0	0	S	1	3	0
55536	CDCA7L	S	2	3	0.54		0	0	0	S	2	5	0.18	S	1	1	0.04	S	2	4	0.63	S	1	1	0.05	S	1	1	0.64		0	0	0	S	1	2	0.47	S	1	1	0	S	1	2	0.46		0	0	0
128239	IQGAP3	S	5	8	0.11		0	0	0	S	2	2	0.05	R	1	1	0	S	3	4	0.02	S	2	2	0.02	S	5	6	0.1		0	0	0	S	1	2	0.002		0	0	0	S	1	1	0	S	1	1	0
84905	ZNF341	S	2	2	0.16		0	0	0	S	2	3	0.19	R	1	3	0	S	2	3	0.2	R	2	3	0	S	1	1	0.18		0	0	0	S	2	3	0.3		0	0	0	S	3	3	0.31		0	0	0
8545	CGGBP1	S	1	2	0.71		0	0	0	S	2	4	2.2	R	1	2	0	S	2	3	2.2		0	0	0	S	3	6	4.4	S	1	2	0.13	S	2	4	1.9	S	1	1	0	S	3	5	4.9	A	1	1	0
254394	MCM9	S	1	1	0.07		0	0	0	S	2	2	0.1	R	1	1	0.03	R	1	2	0.04		0	0	0	S	1	1	0.1	A	1	1	0.01	S	2	3	0.14	S	1	1	0.03	S	1	1	0.12		0	0	0
51804	SIX4	S	4	9	0.33		0	0	0	S	4	8	0.18	R	1	1	0.008	S	4	9	0.28		0	0	0	S	3	5	0.14	S	1	2	0	S	2	3	0.13		0	0	0	S	6	12	0.36	S	1	1	0
83855	KLF16	S	1	1	0.24		0	0	0	R	1	1	0.19	S	1	1	0.06	R	1	1	0.2		0	0	0	S	1	1	0.3	S	1	1	0.05	S	1	1	0.3		0	0	0		0	0	0		0	0	0
1911	PHC1	S	2	4	0.06		0	0	0	S	1	2	0.07	S	1	1	0	R	1	1	0		0	0	0	S	1	1	0.06		0	0	0	S	2	2	0.07	S	1	1	0.02	S	3	4	0.07	S	1	1	0
26277	TINF2	S	3	5	1		0	0	0	S	1	1	0.04	S	2	2	0.03		0	0	0	S	1	1	0	S	1	1	0	S	1	1	0	S	2	2	0.55	S	1	1	0.06	S	1	1	0	S	1	1	0
57798	GATAD1	S	1	1	0		0	0	0	S	1	1	0.1	S	1	1	0.02		0	0	0	S	2	2	0.11	R	1	1	0	S	3	3	0.2	S	1	1	0.11	S	1	2	0.03	S	1	1	0.06	S	1	2	0
7507	XPA	R	1	2	0.38		0	0	0	R	1	1	0.36	S	1	1	0		0	0	0	R	1	1	0	R	1	1	0.81	R	1	1	0	S	1	1	0.59	S	1	2	0.03		0	0	0	R	1	2	0.03
2077	ERF	S	2	2	0.11		0	0	0	S	1	4	0.5	S	1	2	0.04		0	0	0	S	2	3	0.04		0	0	0	S	1	1	0.04		0	0	0		0	0	0	S	1	1	0.03	S	1	2	0.07
8672	EIF4G3	A	1	1	0.04		0	0	0	S	1	1	0.04	R	1	1	0.009		0	0	0	A	1	1	0.01		0	0	0		0	0	0	S	1	1	0.04		0	0	0	S	1	1	0.04	S	1	1	0
2355	FOSL2	S	2	2	0.17		0	0	0	R	1	1	0.14	S	1	1	0		0	0	0		0	0	0	S	1	1	0.12		0	0	0	S	1	2	0.13	S	1	1	0	S	1	1	0.18	S	1	1	0
222255	ATXN7L1	R	1	1	2.6		0	0	0	R	2	2	5.8	R	1	1	1		0	0	0		0	0	0	A	1	1	1.7		0	0	0	S	1	2	2.3	S	1	1	0.76		0	0	0	R	1	1	0.54
85313	PPIL4	R	1	1	0.24		0	0	0	R	1	2	0.18	S	1	2	0.06		0	0	0		0	0	0		0	0	0	S	1	1	0.05		0	0	0	S	1	1	0	S	1	2	0.09		0	0	0
25909	AHCTF1	S	1	1	0.002		0	0	0	R	1	3	0		0	0	0	S	1	3	0.004	S	2	2	0	S	3	6	0.03	R	1	2	0	S	1	2	0	S	1	2	0		0	0	0	S	9	10	0
84437	MSANTD4	S	1	1	0		0	0	0	S	2	3	0.49		0	0	0	S	1	2	0.35	S	1	1	0	S	1	1	0.41	S	3	3	0.24	S	1	6	0.36		0	0	0	S	1	4	0.34	S	1	1	0
1912	PHC2	S	1	3	0.16		0	0	0	R	1	1	0.13		0	0	0	R	2	5	0.39	R	1	1	0.01	A	1	1	0.04	S	1	1	0.03	S	1	1	0.13		0	0	0	S	1	1	0.12	S	1	1	0
2117	ETV3	S	2	2	0.12		0	0	0	S	2	4	0.31		0	0	0	S	2	5	0.29	S	1	2	0	S	2	5	0.41		0	0	0	S	1	2	0.08		0	0	0	S	1	2	0.04		0	0	0
5087	PBX1	S	3	6	0.48		0	0	0	S	2	6	0.52		0	0	0	S	3	9	1.1	S	1	1	0	S	3	6	0.6	S	1	1	0	S	3	10	0.71		0	0	0	S	2	7	0.69		0	0	0
221527	ZBTB12	R	1	1	0.14		0	0	0	R	1	1	0.19		0	0	0	R	2	4	0.5		0	0	0	S	2	6	0.21	S	1	1	0.02	S	3	5	0.62	S	1	1	0.02	S	1	4	0.22	S	1	2	0.01
4783	NFIL3	S	1	1	0.06		0	0	0	S	1	1	0.02		0	0	0	R	1	1	0.23		0	0	0	S	2	3	0.17	S	1	2	0	S	1	1	0.03		0	0	0	S	2	2	0.31		0	0	0
56171	DNAH7	A	1	1	0.005		0	0	0	S	2	3	0.25		0	0	0	A	1	1	0.02		0	0	0	R	1	1	0.03	A	1	1	0.01		0	0	0		0	0	0		0	0	0		0	0	0
2353	FOS	A	1	1	1		0	0	0	R	1	1	0.95		0	0	0	R	1	1	0.79		0	0	0	R	1	1	1.2		0	0	0	S	1	1	0.71	S	1	1	0.25	S	1	1	1.1	R	1	1	0.26
64425	POLR1E	S	3	3	0.29		0	0	0	S	1	1	0.15		0	0	0	S	1	2	0.07		0	0	0	S	2	2	0.37		0	0	0	S	1	1	0	S	1	1	0.02	S	2	2	0.56		0	0	0
5001	ORC5	S	1	1	0.08		0	0	0	A	1	1	0.39		0	0	0	R	1	2	0.41		0	0	0	A	1	1	0.51		0	0	0	S	1	1	0.41	S	1	1	0	S	1	1	0.4		0	0	0
79915	ATAD5	S	4	6	0.04		0	0	0	S	4	5	0.04		0	0	0	S	5	8	0.06		0	0	0	S	5	8	0.04		0	0	0	S	3	4	0.03		0	0	0	S	3	3	0.06	S	1	1	0
374655	ZNF710	R	1	1	0.27		0	0	0	S	2	4	0.38		0	0	0	S	1	1	0.03		0	0	0	S	1	1	0.02		0	0	0	S	2	2	0.29		0	0	0	S	2	3	0.22	A	1	1	0.08
81704	DOCK8	S	1	3	0.03		0	0	0	S	1	2	0.03		0	0	0	S	1	4	0.02		0	0	0	S	1	2	0.02		0	0	0	S	1	1	0.03		0	0	0	S	1	3	0.03	A	1	1	0
310	ANXA7	S	5	8	0.42		0	0	0	S	6	8	0.71		0	0	0	S	5	6	0.76		0	0	0	S	4	8	0.81		0	0	0	S	5	8	0.74		0	0	0	S	3	6	0.43		0	0	0
9767	JADE3	S	2	4	0.06		0	0	0	S	3	4	0.04		0	0	0	S	2	4	0.1		0	0	0	S	2	4	0		0	0	0	S	1	1	0.08		0	0	0	S	2	3	0.06		0	0	0
2627	GATA6	S	1	2	0.21		0	0	0	S	1	2	0.2		0	0	0	S	1	2	0.32		0	0	0	S	1	3	0.4		0	0	0	S	1	1	0.21		0	0	0	S	1	1	0.16		0	0	0
7443	VRK1	S	5	14	1		0	0	0	S	1	7	0		0	0	0	S	1	5	0.11		0	0	0	S	2	14	1.4		0	0	0	S	1	10	0.4		0	0	0	S	3	13	0.97		0	0	0
130271	PLEKHH2	S	1	3	0.23		0	0	0	R	1	2	0.12		0	0	0	A	1	1	0.05		0	0	0	R	1	2	0.11		0	0	0	S	1	3	0.14		0	0	0	S	1	4	0.23		0	0	0
8930	MBD4	S	2	3	0.21		0	0	0	A	1	1	0.13		0	0	0	S	2	2	0.18		0	0	0	R	2	2	0.02		0	0	0	S	1	1	0.12		0	0	0	S	2	3	0.18		0	0	0
5441	POLR2L	A	1	1	1.4		0	0	0	A	1	1	1.4		0	0	0	A	1	1	1.3		0	0	0	S	1	1	1.9		0	0	0	S	1	1	1.6		0	0	0	S	1	1	0.94		0	0	0
9880	ZBTB39	S	2	2	0.55		0	0	0	S	1	1	0.11		0	0	0	S	3	4	0.12		0	0	0	S	1	1	0.12		0	0	0	S	2	3	0.12		0	0	0		0	0	0		0	0	0
6726	SRP9	S	1	1	0.83		0	0	0	R	1	1	0.98		0	0	0	S	1	1	1.4		0	0	0	S	1	1	1.7		0	0	0	S	1	1	1.3		0	0	0		0	0	0		0	0	0
80314	EPC1	R	1	1	0.02		0	0	0	S	2	3	0.05		0	0	0	S	1	1	0		0	0	0	S	1	1	0		0	0	0	S	2	3	0.11		0	0	0		0	0	0		0	0	0
6670	SP3	S	1	1	0.37		0	0	0	S	1	2	0		0	0	0	R	1	5	0.81		0	0	0	R	1	1	0.31		0	0	0		0	0	0		0	0	0	S	1	1	0.46		0	0	0
54797	MED18	A	1	1	0.66		0	0	0	R	1	1	1.4		0	0	0	A	1	1	0.61		0	0	0	R	1	1	0.79		0	0	0		0	0	0		0	0	0	S	1	1	1.1		0	0	0
7536	SF1	S	1	2	0.2		0	0	0	S	1	2	0.17		0	0	0	S	1	2	0.17		0	0	0	S	1	2	0.15		0	0	0		0	0	0		0	0	0		0	0	0		0	0	0
6727	SRP14	S	2	2	0.68		0	0	0	S	1	4	0.97		0	0	0	S	1	5	0.5		0	0	0		0	0	0	S	2	3	0.16	S	1	1	0.04		0	0	0		0	0	0	S	1	1	0.08
115950	ZNF653	S	1	1	0.59		0	0	0	S	1	1	0.51		0	0	0	S	1	3	0.35		0	0	0		0	0	0		0	0	0	S	1	2	0.49		0	0	0	S	1	1	0.13		0	0	0
255252	LRRC57	S	1	2	0.22		0	0	0	S	1	2	0.1		0	0	0	S	1	2	0.13		0	0	0		0	0	0		0	0	0	S	1	3	0.19		0	0	0	S	1	2	0.15		0	0	0
4703	NEB	R	1	1	0.02		0	0	0	S	2	3	0.02		0	0	0		0	0	0	S	1	2	0.01		0	0	0	S	2	2	0.009	S	1	1	0.004	S	2	2	0.005	S	1	1	0.009		0	0	0
1293	COL6A3	A	1	1	0.02		0	0	0	A	1	1	0.004		0	0	0		0	0	0	A	1	1	0		0	0	0	R	1	1	0.03		0	0	0	S	1	1	0.005		0	0	0		0	0	0
6241	RRM2	A	1	1	0.11		0	0	0	A	1	1	0.14		0	0	0		0	0	0	S	1	1	0.04		0	0	0	S	1	1	0.08		0	0	0		0	0	0		0	0	0	S	1	2	0.03
9278	ZBTB22	S	2	2	0.07		0	0	0	S	1	1	0.04		0	0	0		0	0	0	R	1	1	0		0	0	0		0	0	0		0	0	0		0	0	0		0	0	0		0	0	0
79840	NHEJ1	S	1	1	0.09		0	0	0	S	1	2	0.37		0	0	0		0	0	0		0	0	0	A	1	1	0	S	1	1	0.09		0	0	0	S	1	1	0	S	1	1	0.35	A	1	1	0.08
7690	ZNF131	S	3	3	0.16		0	0	0	S	1	1	0		0	0	0		0	0	0		0	0	0	A	1	1	0.1	R	1	1	0.03		0	0	0		0	0	0	S	2	2	0.11		0	0	0
51003	MED31	S	1	1	0.26		0	0	0	S	1	1	0.51		0	0	0		0	0	0		0	0	0	S	2	2	0.84		0	0	0	S	1	2	0		0	0	0	S	2	2	1.4		0	0	0
55957	LIN37	S	1	2	0.05		0	0	0	S	1	1	0		0	0	0		0	0	0		0	0	0	S	1	1	0		0	0	0	S	1	1	0.08		0	0	0		0	0	0		0	0	0
4772	NFATC1	A	1	1	0		0	0	0	S	1	2	0		0	0	0		0	0	0		0	0	0	R	1	1	0.03		0	0	0	S	1	1	0.04		0	0	0		0	0	0		0	0	0
85452	CFAP74	A	1	1	0.04		0	0	0	A	1	1	0.06		0	0	0		0	0	0		0	0	0	A	1	1	0.18		0	0	0	S	1	1	0.09		0	0	0		0	0	0		0	0	0
10228	STX6	A	1	2	0.31		0	0	0	R	1	1	0.16		0	0	0		0	0	0		0	0	0		0	0	0		0	0	0	S	1	1	0.21		0	0	0		0	0	0		0	0	0
65065	NBEAL1	S	1	1	0		0	0	0	A	1	1	0		0	0	0		0	0	0		0	0	0		0	0	0		0	0	0		0	0	0		0	0	0		0	0	0	A	2	3	0.13
2027	ENO3	S	1	1	0.14		0	0	0	R	1	1	0.1		0	0	0		0	0	0		0	0	0		0	0	0		0	0	0		0	0	0		0	0	0		0	0	0		0	0	0
8464	SUPT3H	R	1	1	0		0	0	0		0	0	0	A	1	1	0.24	A	1	2	0		0	0	0	S	1	1	0	S	1	1	0	S	1	3	0		0	0	0		0	0	0		0	0	0
4841	NONO	S	1	2	0.08		0	0	0		0	0	0	A	1	1	0.05	R	1	1	0.07		0	0	0	S	1	2	0.1	S	2	2	0.07		0	0	0	S	2	3	0.05	S	1	1	0	S	2	3	0.12
11113	CIT	R	1	1	0.78		0	0	0		0	0	0	R	1	1	0.0009	S	1	1	0.22		0	0	0		0	0	0		0	0	0	S	2	2	0.16		0	0	0	S	1	1	0		0	0	0
65217	PCDH15	S	1	1	0.22		0	0	0		0	0	0	S	1	1	0.11	S	1	1	0.36		0	0	0		0	0	0		0	0	0	S	1	1	0.35		0	0	0		0	0	0	A	1	1	0
3225	HOXC9	S	1	1	0.15		0	0	0		0	0	0	S	1	1	0	S	1	2	0.12		0	0	0		0	0	0		0	0	0	S	1	2	0		0	0	0		0	0	0		0	0	0
64411	ARAP3	S	1	2	0.02		0	0	0		0	0	0	R	1	1	0.01	R	1	1	0.02		0	0	0		0	0	0		0	0	0	S	1	1	0.03		0	0	0		0	0	0		0	0	0
1736	DKC1	S	1	1	0.1		0	0	0		0	0	0	S	2	2	0.02		0	0	0	S	1	1	0.05	S	2	3	0.2	S	1	1	0	S	1	2	0.11	S	1	2	0.03	S	1	1	0.02		0	0	0
51441	YTHDF2	R	1	1	0.16		0	0	0		0	0	0	S	1	1	0		0	0	0	S	1	1	0	A	1	1	0.04		0	0	0		0	0	0	S	1	1	0	S	1	1	0.07		0	0	0
7175	TPR	A	1	1	0		0	0	0		0	0	0	R	1	1	0		0	0	0	S	4	7	0.008		0	0	0	A	1	1	0		0	0	0	S	1	1	0		0	0	0	S	4	8	0.002
326	AIRE	A	1	1	0.02		0	0	0		0	0	0	R	1	1	0.66		0	0	0	R	1	2	0.78		0	0	0	R	1	1	0.56		0	0	0		0	0	0	S	1	1	0.52	A	1	1	0.57
23325	KIAA1033	A	1	1	0		0	0	0		0	0	0	S	2	2	0		0	0	0	S	4	4	0.05		0	0	0		0	0	0		0	0	0	S	2	2	0.006		0	0	0	S	2	2	0.009
6911	TBX6	R	1	1	0.12		0	0	0		0	0	0	A	1	1	0.04		0	0	0		0	0	0	S	1	1	0.25	R	1	1	0.04		0	0	0	S	1	1	0	S	1	1	0.66	A	1	1	0.04
64901	RANBP17	A	1	1	0.03		0	0	0		0	0	0	R	1	1	0.02		0	0	0		0	0	0	A	1	1	0.31		0	0	0		0	0	0	S	1	1	0.01		0	0	0		0	0	0
988	CDC5L	S	1	1	0.02		0	0	0		0	0	0	S	1	1	0		0	0	0		0	0	0		0	0	0		0	0	0	S	1	1	0		0	0	0		0	0	0	R	1	1	0
113146	AHNAK2	A	1	1	0.01		0	0	0		0	0	0	A	1	1	0		0	0	0		0	0	0		0	0	0		0	0	0	S	1	2	0.003		0	0	0		0	0	0	A	1	1	0.007
56204	FAM214A	A	1	1	0.009		0	0	0		0	0	0	R	1	1	0.05		0	0	0		0	0	0		0	0	0		0	0	0	S	1	2	0.05		0	0	0		0	0	0		0	0	0
6389	SDHA	A	1	1	0.06		0	0	0		0	0	0	A	1	1	0.01		0	0	0		0	0	0		0	0	0		0	0	0	S	1	1	0.11		0	0	0		0	0	0		0	0	0
9703	KIAA0100	S	1	1	0.002		0	0	0		0	0	0	R	1	1	0.004		0	0	0		0	0	0		0	0	0		0	0	0		0	0	0		0	0	0		0	0	0		0	0	0
2079	ERH	R	1	1	1		0	0	0		0	0	0	S	1	1	0.26		0	0	0		0	0	0		0	0	0		0	0	0		0	0	0		0	0	0		0	0	0		0	0	0
140688	NOL4L	S	1	1	0.17		0	0	0		0	0	0		0	0	0	S	2	4	0.14	S	1	1	0	R	2	2	0.19	S	1	1	0	S	1	1	0.02		0	0	0		0	0	0		0	0	0
1810	DR1	S	1	1	0.21		0	0	0		0	0	0		0	0	0	A	1	1	0.18	S	1	1	0.12	S	1	2	0.23	R	1	1	0.08		0	0	0		0	0	0		0	0	0		0	0	0
22974	TPX2	R	1	1	0.02		0	0	0		0	0	0		0	0	0	S	1	1	0.03	S	2	2	0		0	0	0		0	0	0		0	0	0		0	0	0		0	0	0	S	1	1	0
2803	GOLGA4	A	1	1	0.01		0	0	0		0	0	0		0	0	0	A	1	1	0.12		0	0	0	A	1	1	0.02	A	2	2	0.009		0	0	0		0	0	0		0	0	0	S	3	3	0.01
9204	ZMYM6	S	1	1	0.01		0	0	0		0	0	0		0	0	0	S	2	4	0.03		0	0	0	S	2	3	0.03		0	0	0	S	2	3	0.06		0	0	0	S	2	3	0.02		0	0	0
5090	PBX3	S	1	2	0.13		0	0	0		0	0	0		0	0	0	S	1	3	0.35		0	0	0	R	1	1	0.35		0	0	0	S	1	1	0.24		0	0	0		0	0	0		0	0	0
221830	TWISTNB	S	1	2	0		0	0	0		0	0	0		0	0	0	R	1	1	0.07		0	0	0	R	1	1	0.14		0	0	0		0	0	0	S	1	1	0	S	1	1	0	R	1	2	0
55870	ASH1L	R	1	1	0.01		0	0	0		0	0	0		0	0	0	S	1	1	0.005		0	0	0	R	2	2	0.21		0	0	0		0	0	0	S	1	1	0.004		0	0	0	S	1	1	0.005
1876	E2F6	S	1	1	0		0	0	0		0	0	0		0	0	0	S	2	2	0		0	0	0		0	0	0	S	1	1	0		0	0	0		0	0	0		0	0	0		0	0	0
3097	HIVEP2	S	1	1	0.02		0	0	0		0	0	0		0	0	0	S	2	2	0.005		0	0	0		0	0	0		0	0	0	S	1	1	0	S	1	1	0.002	S	1	1	0	R	1	1	0.003
79649	MAP7D3	S	1	2	0.02		0	0	0		0	0	0		0	0	0	A	1	1	0.02		0	0	0		0	0	0		0	0	0		0	0	0		0	0	0	S	1	1	0.04	S	1	2	0
5000	ORC4	R	3	3	0.65		0	0	0		0	0	0		0	0	0		0	0	0	R	1	1	0	S	2	2	0.52	R	1	1	0.04	S	2	3	0.33		0	0	0	S	3	4	0.46		0	0	0
23135	KDM6B	S	1	3	0.03		0	0	0		0	0	0		0	0	0		0	0	0	S	1	1	0.008		0	0	0	A	1	1	0		0	0	0		0	0	0	S	1	1	0.04		0	0	0
10427	SEC24B	A	1	1	0.57		0	0	0		0	0	0		0	0	0		0	0	0	S	1	1	0		0	0	0	S	1	1	0		0	0	0		0	0	0		0	0	0	S	1	1	0
85457	CIPC	R	1	1	0		0	0	0		0	0	0		0	0	0		0	0	0	S	2	2	0		0	0	0		0	0	0	S	1	1	0		0	0	0	S	1	1	0		0	0	0
339344	MYPOP	S	2	3	0.03		0	0	0		0	0	0		0	0	0		0	0	0	S	1	1	0		0	0	0		0	0	0		0	0	0		0	0	0		0	0	0		0	0	0
57060	PCBP4	A	1	1	0.04		0	0	0		0	0	0		0	0	0		0	0	0	A	1	1	0		0	0	0		0	0	0		0	0	0		0	0	0		0	0	0	S	2	3	0.01
163175	LGI4	S	1	1	0.2		0	0	0		0	0	0		0	0	0		0	0	0		0	0	0	R	1	1	0.26	R	1	1	0.14		0	0	0		0	0	0		0	0	0	R	1	1	0.09
6837	MED22	S	1	1	0.29		0	0	0		0	0	0		0	0	0		0	0	0		0	0	0	S	1	1	0.7	A	1	1	0		0	0	0		0	0	0		0	0	0		0	0	0
317	APAF1	S	1	1	0.28		0	0	0		0	0	0		0	0	0		0	0	0		0	0	0	A	1	1	0.005	R	1	1	0.12		0	0	0		0	0	0		0	0	0		0	0	0
80146	UXS1	R	1	1	1.4		0	0	0		0	0	0		0	0	0		0	0	0		0	0	0	A	1	1	1.4		0	0	0	S	1	1	1.2		0	0	0		0	0	0	A	1	1	0.08
6635	SNRPE	S	1	3	0.86		0	0	0		0	0	0		0	0	0		0	0	0		0	0	0	R	1	1	1.5		0	0	0	S	1	1	0.71		0	0	0		0	0	0		0	0	0
23262	PPIP5K2	A	1	1	0.05		0	0	0		0	0	0		0	0	0		0	0	0		0	0	0	R	1	3	0.06		0	0	0		0	0	0	S	1	3	0.01		0	0	0	A	1	1	0
55320	MIS18BP1	A	1	1	0.04		0	0	0		0	0	0		0	0	0		0	0	0		0	0	0	A	1	1	0.25		0	0	0		0	0	0		0	0	0	S	1	1	0.19	A	1	1	0
865	CBFB	S	1	1	0		0	0	0		0	0	0		0	0	0		0	0	0		0	0	0	S	1	2	0		0	0	0		0	0	0		0	0	0	S	1	2	0		0	0	0
6050	RNH1	A	1	1	0		0	0	0		0	0	0		0	0	0		0	0	0		0	0	0	A	1	1	0.86		0	0	0		0	0	0		0	0	0	S	1	1	0		0	0	0
56605	ERO1B	R	1	1	0.23		0	0	0		0	0	0		0	0	0		0	0	0		0	0	0	S	1	2	0.2		0	0	0		0	0	0		0	0	0		0	0	0		0	0	0
688	KLF5	R	1	1	0		0	0	0		0	0	0		0	0	0		0	0	0		0	0	0	S	1	1	0.09		0	0	0		0	0	0		0	0	0		0	0	0		0	0	0
200162	SPAG17	A	1	1	0.01		0	0	0		0	0	0		0	0	0		0	0	0		0	0	0	S	1	1	0.03		0	0	0		0	0	0		0	0	0		0	0	0		0	0	0
5782	PTPN12	A	1	1	0.09		0	0	0		0	0	0		0	0	0		0	0	0		0	0	0	S	1	1	0.25		0	0	0		0	0	0		0	0	0		0	0	0		0	0	0
405	ARNT	R	1	1	0		0	0	0		0	0	0		0	0	0		0	0	0		0	0	0		0	0	0	S	1	1	0	S	3	5	2.3		0	0	0	S	1	1	0		0	0	0
8241	RBM10	A	1	1	0.14		0	0	0		0	0	0		0	0	0		0	0	0		0	0	0		0	0	0	A	1	1	0		0	0	0	S	1	1	0.02		0	0	0		0	0	0
6201	RPS7	S	1	2	0.11		0	0	0		0	0	0		0	0	0		0	0	0		0	0	0		0	0	0	S	1	3	0.04		0	0	0		0	0	0		0	0	0		0	0	0
9704	DHX34	S	1	1	0.02		0	0	0		0	0	0		0	0	0		0	0	0		0	0	0		0	0	0	A	1	1	0		0	0	0		0	0	0		0	0	0		0	0	0
10144	FAM13A	A	1	1	0		0	0	0		0	0	0		0	0	0		0	0	0		0	0	0		0	0	0	S	1	1	0		0	0	0		0	0	0		0	0	0		0	0	0
390058	OR51B6	S	1	1	0.25		0	0	0		0	0	0		0	0	0		0	0	0		0	0	0		0	0	0		0	0	0	S	1	2	0.03		0	0	0	S	1	1	0		0	0	0
285175	UNC80	R	1	2	0.03		0	0	0		0	0	0		0	0	0		0	0	0		0	0	0		0	0	0		0	0	0	S	1	1	0.03		0	0	0	S	1	1	0.04		0	0	0
118611	C10orf90	A	1	1	0.1		0	0	0		0	0	0		0	0	0		0	0	0		0	0	0		0	0	0		0	0	0	S	1	1	0.03		0	0	0		0	0	0	R	1	1	0.12
6493	SIM2	S	1	1	0.01		0	0	0		0	0	0		0	0	0		0	0	0		0	0	0		0	0	0		0	0	0	S	1	1	0		0	0	0		0	0	0		0	0	0
2825	GPR1	S	1	1	0.5		0	0	0		0	0	0		0	0	0		0	0	0		0	0	0		0	0	0		0	0	0	S	1	1	0.12		0	0	0		0	0	0		0	0	0
29920	PYCR2	A	1	1	0.94		0	0	0		0	0	0		0	0	0		0	0	0		0	0	0		0	0	0		0	0	0	S	1	1	0.71		0	0	0		0	0	0		0	0	0
161436	EML5	A	1	1	0		0	0	0		0	0	0		0	0	0		0	0	0		0	0	0		0	0	0		0	0	0	S	1	1	0.26		0	0	0		0	0	0		0	0	0
63935	PCIF1	A	1	1	0.14		0	0	0		0	0	0		0	0	0		0	0	0		0	0	0		0	0	0		0	0	0	S	1	1	0		0	0	0		0	0	0		0	0	0
58528	RRAGD	A	1	1	0.15		0	0	0		0	0	0		0	0	0		0	0	0		0	0	0		0	0	0		0	0	0	S	1	1	0.15		0	0	0		0	0	0		0	0	0
201134	CEP112	A	1	1	0.07		0	0	0		0	0	0		0	0	0		0	0	0		0	0	0		0	0	0		0	0	0		0	0	0	S	1	1	0.02	S	1	1	0.14		0	0	0
55250	ELP2	A	1	1	0.04		0	0	0		0	0	0		0	0	0		0	0	0		0	0	0		0	0	0		0	0	0		0	0	0	S	1	1	0		0	0	0		0	0	0
26273	FBXO3	A	1	1	1.3		0	0	0		0	0	0		0	0	0		0	0	0		0	0	0		0	0	0		0	0	0		0	0	0	S	1	1	0.08		0	0	0		0	0	0
9687	GREB1	S	3	4	0.03		0	0	0		0	0	0		0	0	0		0	0	0		0	0	0		0	0	0		0	0	0		0	0	0		0	0	0	S	1	3	0.05	S	6	6	0.03
10360	NPM3	S	1	2	0.05		0	0	0		0	0	0		0	0	0		0	0	0		0	0	0		0	0	0		0	0	0		0	0	0		0	0	0	S	1	1	0.1	S	1	1	0
1783	DYNC1LI2	A	1	1	0.27		0	0	0		0	0	0		0	0	0		0	0	0		0	0	0		0	0	0		0	0	0		0	0	0		0	0	0	S	1	1	0	A	1	1	0.07
84033	OBSCN	S	2	2	0.002		0	0	0		0	0	0		0	0	0		0	0	0		0	0	0		0	0	0		0	0	0		0	0	0		0	0	0	S	1	2	0		0	0	0
60312	AFAP1	R	1	1	0.03		0	0	0		0	0	0		0	0	0		0	0	0		0	0	0		0	0	0		0	0	0		0	0	0		0	0	0	S	1	1	0.04		0	0	0
92002	FAM58A	A	1	1	1.1		0	0	0		0	0	0		0	0	0		0	0	0		0	0	0		0	0	0		0	0	0		0	0	0		0	0	0	S	1	1	3.6		0	0	0
8320	EOMES	A	1	1	0.07		0	0	0		0	0	0		0	0	0		0	0	0		0	0	0		0	0	0		0	0	0		0	0	0		0	0	0	S	1	1	0.07		0	0	0
9573	GDF3	A	1	1	0.24		0	0	0		0	0	0		0	0	0		0	0	0		0	0	0		0	0	0		0	0	0		0	0	0		0	0	0	S	1	1	0.61		0	0	0
27136	MORC1	A	1	1	0.55		0	0	0		0	0	0		0	0	0		0	0	0		0	0	0		0	0	0		0	0	0		0	0	0		0	0	0	S	1	1	0		0	0	0
400954	EML6	S	1	1	0.03		0	0	0		0	0	0		0	0	0		0	0	0		0	0	0		0	0	0		0	0	0		0	0	0		0	0	0		0	0	0	A	1	1	0.03
8567	MADD	R	1	1	0.04		0	0	0		0	0	0		0	0	0		0	0	0		0	0	0		0	0	0		0	0	0		0	0	0		0	0	0		0	0	0	S	1	2	0.004
8615	USO1	A	1	1	0		0	0	0		0	0	0		0	0	0		0	0	0		0	0	0		0	0	0		0	0	0		0	0	0		0	0	0		0	0	0	S	4	5	0.03
705	BYSL	A	1	1	3		0	0	0		0	0	0		0	0	0		0	0	0		0	0	0		0	0	0		0	0	0		0	0	0		0	0	0		0	0	0	S	2	2	0
6498	SKIL	S	2	2	0.08		0	0	0		0	0	0		0	0	0		0	0	0		0	0	0		0	0	0		0	0	0		0	0	0		0	0	0		0	0	0		0	0	0
4488	MSX2	S	1	2	0.34		0	0	0		0	0	0		0	0	0		0	0	0		0	0	0		0	0	0		0	0	0		0	0	0		0	0	0		0	0	0		0	0	0
130951	M1AP	S	1	1	0		0	0	0		0	0	0		0	0	0		0	0	0		0	0	0		0	0	0		0	0	0		0	0	0		0	0	0		0	0	0		0	0	0
59345	GNB4	S	1	1	0.09		0	0	0		0	0	0		0	0	0		0	0	0		0	0	0		0	0	0		0	0	0		0	0	0		0	0	0		0	0	0		0	0	0
84334	APOPT1	S	1	1	0.94		0	0	0		0	0	0		0	0	0		0	0	0		0	0	0		0	0	0		0	0	0		0	0	0		0	0	0		0	0	0		0	0	0
124961	ZFP3	S	1	1	0.02		0	0	0		0	0	0		0	0	0		0	0	0		0	0	0		0	0	0		0	0	0		0	0	0		0	0	0		0	0	0		0	0	0
6428	SRSF3	R	1	1	0	S	4	4	0.4	S	2	3	1.5	S	4	4	1.7	S	2	7	1.8	S	4	6	1.3	S	3	7	3.9	S	4	5	0.64	S	1	2	1.6	S	3	6	0.81	S	2	3	3.2	S	3	3	0.1
9775	EIF4A3	A	1	1	0.09	S	3	3	0.2	R	1	1	0.03	S	4	7	0.41		0	0	0	S	5	8	0.3		0	0	0	S	2	2	0.21		0	0	0	S	3	3	0.21	S	1	1	0.07	S	7	9	0.23
7026	NR2F2	S	1	1	0.1	S	3	4	0.16	S	2	2	0.29	A	1	3	0	S	2	2	0.35	A	1	2	0	R	1	1	0.1	S	3	4	0.03	S	1	1	0.07	S	2	4	0.02	S	1	1	0.06	S	2	2	0.05
8861	LDB1	R	1	1	0.13	A	1	1	0.02	R	1	1	0.14		0	0	0	S	3	3	0.34	A	1	1	0	S	2	2	0.5	S	3	4	0.02	S	2	2	0.31	S	2	3	0.1	S	2	2	0.29		0	0	0
25842	ASF1A	R	1	1	0.65	S	2	3	0.45	R	1	1	0.97		0	0	0	R	1	1	0.84	S	1	4	0.83	R	1	1	1.1	S	2	4	1.1	S	1	1	1.1	S	1	3	0.66	S	1	1	0.97	S	2	3	0.84
6432	SRSF7	R	1	1	0	S	3	6	0.19	A	1	2	0	S	3	4	0.48	A	1	4	0	S	4	5	0.68	A	1	3	0	S	3	4	0		0	0	0	S	4	6	0.13	S	2	2	0.33	S	3	3	0.15
64375	IKZF4	S	1	2	0.03	A	1	1	0	A	1	1	0		0	0	0	A	1	1	0		0	0	0	A	1	4	0		0	0	0	A	1	4	0		0	0	0		0	0	0	A	1	1	0
2011	MARK2	R	1	1	0.03	S	4	4	0.04		0	0	0	A	1	1	0.06		0	0	0	S	3	3	0.04	A	1	1	0.006	S	3	4	0.04		0	0	0	S	2	2	0		0	0	0	S	6	6	0.11
1973	EIF4A1	A	1	1	0.09	S	5	6	0.28		0	0	0	S	3	7	0.44		0	0	0	S	8	16	2.5	S	1	1	0.04	S	7	9	0.64		0	0	0	S	6	10	0.77	S	1	1	0.07	S	9	15	1.5
60	ACTB	S	14	31	18.9	S	15	35	6.2	S	16	42	38.2	S	17	36	8.8	S	11	45	19.2	S	16	38	8.8	S	15	39	25	S	17	38	8.8	S	13	40	18.7	S	16	43	7.5	S	12	38	21.3	S	15	32	6.7
23476	BRD4	S	1	1	0.007	S	1	1	0	S	2	2	0.09	A	1	1	0.03	S	2	3	0.07	R	2	2	0.05	S	1	1	0.007	A	1	1	0.02	S	2	3	0.1	S	1	1	0	S	1	1	0.002	A	2	2	0.04
23097	CDK19	S	1	1	0.14	S	1	2	0.03	S	3	4	0.6	S	2	3	0.29	S	1	1	0.11	S	1	2	0.04		0	0	0	S	1	1	0.03		0	0	0	S	1	1	0.03	S	1	1	0.26	S	1	2	0.05
7090	TLE3	A	1	1	0.04	S	2	3	0.02	S	1	3	0.02	S	2	3	0.02	S	1	3	0.02	S	3	4	0.16	S	1	1	0.03	S	2	6	0.08	S	3	4	0.27	S	1	2	0.01	S	1	1	0.02	S	2	3	0.08
6612	SUMO3	S	1	2	0.2	S	1	1	0.07	S	1	2	0.23	S	1	2	0.1	S	1	1	0.35	S	1	1	0	S	1	1	0.2	S	1	1	0	S	1	1	0.22	S	1	4	0.08	S	1	1	0.28	S	2	3	3
3303	HSPA1A	S	32	79	36	S	28	73	8.7	S	27	95	29.6	S	30	78	13.8	S	29	114	35.5	S	29	84	14.5	S	30	92	46.5	S	28	61	11.9	S	29	91	29.5	S	29	71	8.6	S	30	109	31.9	S	26	77	9.5
3304	HSPA1B	S	32	79	36	S	28	73	8.7	S	27	95	29.6	S	30	78	13.8	S	29	114	35.5	S	29	84	14.5	S	30	92	46.5	S	28	61	11.9	S	29	91	29.5	S	29	71	8.6	S	30	109	31.9	S	26	77	9.5
10376	TUBA1B	S	17	60	140	S	22	92	63.5	S	18	112	171	S	19	70	26.7	S	18	128	217	S	23	93	98.2	S	20	99	262	S	22	74	82.7	S	20	119	170	S	15	73	22.2	S	17	107	174	S	19	91	97.5
8294	HIST1H4I	S	6	14	2	S	5	7	0.49	S	4	9	2.4	S	5	7	1.4	S	4	8	1.9	S	5	13	1.2	S	7	15	3.9	S	6	17	1.1	S	4	9	2.3	S	5	10	0.8	S	7	15	1.6	S	4	10	0.58
8359	HIST1H4A	S	6	14	2	S	5	7	0.49	S	4	9	2.4	S	5	7	1.4	S	4	8	1.9	S	5	13	1.2	S	7	15	3.9	S	6	17	1.1	S	4	9	2.3	S	5	10	0.8	S	7	15	1.6	S	4	10	0.58
8360	HIST1H4D	S	6	14	2	S	5	7	0.49	S	4	9	2.4	S	5	7	1.4	S	4	8	1.9	S	5	13	1.2	S	7	15	3.9	S	6	17	1.1	S	4	9	2.3	S	5	10	0.8	S	7	15	1.6	S	4	10	0.58
8361	HIST1H4F	S	6	14	2	S	5	7	0.49	S	4	9	2.4	S	5	7	1.4	S	4	8	1.9	S	5	13	1.2	S	7	15	3.9	S	6	17	1.1	S	4	9	2.3	S	5	10	0.8	S	7	15	1.6	S	4	10	0.58
8362	HIST1H4K	S	6	14	2	S	5	7	0.49	S	4	9	2.4	S	5	7	1.4	S	4	8	1.9	S	5	13	1.2	S	7	15	3.9	S	6	17	1.1	S	4	9	2.3	S	5	10	0.8	S	7	15	1.6	S	4	10	0.58
8363	HIST1H4J	S	6	14	2	S	5	7	0.49	S	4	9	2.4	S	5	7	1.4	S	4	8	1.9	S	5	13	1.2	S	7	15	3.9	S	6	17	1.1	S	4	9	2.3	S	5	10	0.8	S	7	15	1.6	S	4	10	0.58
8364	HIST1H4C	S	6	14	2	S	5	7	0.49	S	4	9	2.4	S	5	7	1.4	S	4	8	1.9	S	5	13	1.2	S	7	15	3.9	S	6	17	1.1	S	4	9	2.3	S	5	10	0.8	S	7	15	1.6	S	4	10	0.58
8365	HIST1H4H	S	6	14	2	S	5	7	0.49	S	4	9	2.4	S	5	7	1.4	S	4	8	1.9	S	5	13	1.2	S	7	15	3.9	S	6	17	1.1	S	4	9	2.3	S	5	10	0.8	S	7	15	1.6	S	4	10	0.58
8366	HIST1H4B	S	6	14	2	S	5	7	0.49	S	4	9	2.4	S	5	7	1.4	S	4	8	1.9	S	5	13	1.2	S	7	15	3.9	S	6	17	1.1	S	4	9	2.3	S	5	10	0.8	S	7	15	1.6	S	4	10	0.58
8367	HIST1H4E	S	6	14	2	S	5	7	0.49	S	4	9	2.4	S	5	7	1.4	S	4	8	1.9	S	5	13	1.2	S	7	15	3.9	S	6	17	1.1	S	4	9	2.3	S	5	10	0.8	S	7	15	1.6	S	4	10	0.58
8368	HIST1H4L	S	6	14	2	S	5	7	0.49	S	4	9	2.4	S	5	7	1.4	S	4	8	1.9	S	5	13	1.2	S	7	15	3.9	S	6	17	1.1	S	4	9	2.3	S	5	10	0.8	S	7	15	1.6	S	4	10	0.58
8370	HIST2H4A	S	6	14	2	S	5	7	0.49	S	4	9	2.4	S	5	7	1.4	S	4	8	1.9	S	5	13	1.2	S	7	15	3.9	S	6	17	1.1	S	4	9	2.3	S	5	10	0.8	S	7	15	1.6	S	4	10	0.58
121504	HIST4H4	S	6	14	2	S	5	7	0.49	S	4	9	2.4	S	5	7	1.4	S	4	8	1.9	S	5	13	1.2	S	7	15	3.9	S	6	17	1.1	S	4	9	2.3	S	5	10	0.8	S	7	15	1.6	S	4	10	0.58
554313	HIST2H4B	S	6	14	2	S	5	7	0.49	S	4	9	2.4	S	5	7	1.4	S	4	8	1.9	S	5	13	1.2	S	7	15	3.9	S	6	17	1.1	S	4	9	2.3	S	5	10	0.8	S	7	15	1.6	S	4	10	0.58
5936	RBM4	S	6	8	1.2	S	4	5	0.08	S	2	4	0.54	S	7	10	0.97	S	3	6	1.1	S	6	8	0.59	S	4	10	1.2	S	3	4	0.12	S	4	7	1.2	S	6	10	0.59	S	4	7	1.5	S	6	9	0.56
3013	HIST1H2AD	S	5	15	16.5	S	6	12	2.8	S	6	26	21.1	S	6	16	4.6	S	4	28	15.4	S	7	16	5	S	6	22	30.5	S	7	13	5.6	S	7	30	30.2	S	6	13	3.1	S	6	22	28.1	S	6	9	2
8329	HIST1H2AI	S	5	15	16.5	S	6	12	2.8	S	6	26	21.1	S	6	16	4.6	S	4	28	15.4	S	7	16	5	S	6	22	30.5	S	7	13	5.6	S	7	30	30.2	S	6	13	3.1	S	6	22	28.1	S	6	9	2
8330	HIST1H2AK	S	5	15	16.5	S	6	12	2.8	S	6	26	21.1	S	6	16	4.6	S	4	28	15.4	S	7	16	5	S	6	22	30.5	S	7	13	5.6	S	7	30	30.2	S	6	13	3.1	S	6	22	28.1	S	6	9	2
8331	HIST1H2AJ	S	5	15	16.5	S	6	12	2.8	S	6	26	21.1	S	6	16	4.6	S	4	28	15.4	S	7	16	5	S	6	22	30.5	S	7	13	5.6	S	7	30	30.2	S	6	13	3.1	S	6	22	28.1	S	6	9	2
8332	HIST1H2AL	S	5	15	16.5	S	6	12	2.8	S	6	26	21.1	S	6	16	4.6	S	4	28	15.4	S	7	16	5	S	6	22	30.5	S	7	13	5.6	S	7	30	30.2	S	6	13	3.1	S	6	22	28.1	S	6	9	2
8336	HIST1H2AM	S	5	15	16.5	S	6	12	2.8	S	6	26	21.1	S	6	16	4.6	S	4	28	15.4	S	7	16	5	S	6	22	30.5	S	7	13	5.6	S	7	30	30.2	S	6	13	3.1	S	6	22	28.1	S	6	9	2
8969	HIST1H2AG	S	5	15	16.5	S	6	12	2.8	S	6	26	21.1	S	6	16	4.6	S	4	28	15.4	S	7	16	5	S	6	22	30.5	S	7	13	5.6	S	7	30	30.2	S	6	13	3.1	S	6	22	28.1	S	6	9	2
55766	H2AFJ	S	5	15	16.5	S	6	12	2.8	S	6	26	21.1	S	6	16	4.6	S	4	28	15.4	S	7	16	5	S	6	22	30.5	S	7	13	5.6	S	7	30	30.2	S	6	13	3.1	S	6	22	28.1	S	6	9	2
85235	HIST1H2AH	S	5	15	16.5	S	6	12	2.8	S	6	26	21.1	S	6	16	4.6	S	4	28	15.4	S	7	16	5	S	6	22	30.5	S	7	13	5.6	S	7	30	30.2	S	6	13	3.1	S	6	22	28.1	S	6	9	2
3017	HIST1H2BD	S	5	19	11.2	S	6	23	2.1	S	3	13	2.9	S	6	18	3.7	S	4	13	3.2	S	5	17	3.2	S	5	29	8.1	S	6	15	3.3	S	7	27	8.6	S	6	24	1.7	S	5	25	6.9	S	6	22	2.2
8339	HIST1H2BG	S	5	19	11.2	S	6	23	2.1	S	3	13	2.9	S	6	18	3.7	S	4	13	3.2	S	5	17	3.2	S	5	29	8.1	S	6	15	3.3	S	7	27	8.6	S	6	24	1.7	S	5	25	6.9	S	6	22	2.2
8340	HIST1H2BL	S	5	19	11.2	S	6	23	2.1	S	3	13	2.9	S	6	18	3.7	S	4	13	3.2	S	5	17	3.2	S	5	29	8.1	S	6	15	3.3	S	7	27	8.6	S	6	24	1.7	S	5	25	6.9	S	6	22	2.2
8341	HIST1H2BN	S	5	19	11.2	S	6	23	2.1	S	3	13	2.9	S	6	18	3.7	S	4	13	3.2	S	5	17	3.2	S	5	29	8.1	S	6	15	3.3	S	7	27	8.6	S	6	24	1.7	S	5	25	6.9	S	6	22	2.2
8342	HIST1H2BM	S	5	19	11.2	S	6	23	2.1	S	3	13	2.9	S	6	18	3.7	S	4	13	3.2	S	5	17	3.2	S	5	29	8.1	S	6	15	3.3	S	7	27	8.6	S	6	24	1.7	S	5	25	6.9	S	6	22	2.2
8343	HIST1H2BF	S	5	19	11.2	S	6	23	2.1	S	3	13	2.9	S	6	18	3.7	S	4	13	3.2	S	5	17	3.2	S	5	29	8.1	S	6	15	3.3	S	7	27	8.6	S	6	24	1.7	S	5	25	6.9	S	6	22	2.2
8344	HIST1H2BE	S	5	19	11.2	S	6	23	2.1	S	3	13	2.9	S	6	18	3.7	S	4	13	3.2	S	5	17	3.2	S	5	29	8.1	S	6	15	3.3	S	7	27	8.6	S	6	24	1.7	S	5	25	6.9	S	6	22	2.2
8345	HIST1H2BH	S	5	19	11.2	S	6	23	2.1	S	3	13	2.9	S	6	18	3.7	S	4	13	3.2	S	5	17	3.2	S	5	29	8.1	S	6	15	3.3	S	7	27	8.6	S	6	24	1.7	S	5	25	6.9	S	6	22	2.2
8346	HIST1H2BI	S	5	19	11.2	S	6	23	2.1	S	3	13	2.9	S	6	18	3.7	S	4	13	3.2	S	5	17	3.2	S	5	29	8.1	S	6	15	3.3	S	7	27	8.6	S	6	24	1.7	S	5	25	6.9	S	6	22	2.2
8347	HIST1H2BC	S	5	19	11.2	S	6	23	2.1	S	3	13	2.9	S	6	18	3.7	S	4	13	3.2	S	5	17	3.2	S	5	29	8.1	S	6	15	3.3	S	7	27	8.6	S	6	24	1.7	S	5	25	6.9	S	6	22	2.2
85236	HIST1H2BK	S	5	19	11.2	S	6	23	2.1	S	3	13	2.9	S	6	18	3.7	S	4	13	3.2	S	5	17	3.2	S	5	29	8.1	S	6	15	3.3	S	7	27	8.6	S	6	24	1.7	S	5	25	6.9	S	6	22	2.2
440689	HIST2H2BF	S	5	19	10.5	S	6	23	1.9	S	3	13	2.7	S	6	18	3.4	S	4	13	2.9	S	5	17	3	S	5	29	7.6	S	6	15	3.1	S	7	27	8	S	6	24	1.6	S	5	25	6.4	S	6	22	2.1
6233	RPS27A	S	2	4	2.3	S	3	7	1.1	S	3	6	2.5	S	4	9	1.9	S	3	7	3.7	S	3	8	1.6	S	2	4	1.5	S	5	7	0.81	S	3	5	2.6	S	5	7	1.1	S	2	4	2.4	S	3	6	1.4
7311	UBA52	S	2	4	2.3	S	3	7	1.1	S	3	6	2.5	S	4	9	1.9	S	3	7	3.7	S	3	8	1.6	S	2	4	1.5	S	5	7	0.81	S	3	5	2.6	S	5	7	1.1	S	2	4	2.4	S	3	6	1.4
7314	UBB	S	2	4	1.1	S	3	7	0.51	S	3	6	1.1	S	4	9	0.86	S	3	7	1.7	S	3	8	0.74	S	2	4	0.71	S	5	7	0.38	S	3	5	1.2	S	5	7	0.52	S	2	4	1.1	S	3	6	0.63
7316	UBC	S	2	4	0.38	S	3	7	0.18	S	3	6	0.4	S	4	9	0.3	S	3	7	0.61	S	3	8	0.26	S	2	4	0.25	S	5	7	0.13	S	3	5	0.43	S	5	7	0.18	S	2	4	0.38	S	3	6	0.22
6908	TBP	S	1	1	0	S	2	2	0.21	S	1	2	0.21	S	2	3	0.28	S	2	2	0.45	S	2	3	0.3	S	2	2	0.99	S	2	3	0.23	S	2	3	0.83	S	2	2	0.24	S	2	2	0.92	S	2	2	0.16
387332	TBPL2	S	1	1	0	S	2	2	0.14	S	1	2	0.14	S	2	3	0.19	S	2	2	0.31	S	2	3	0.21	S	2	2	0.68	S	2	3	0.16	S	2	3	0.57	S	2	2	0.16	S	2	2	0.63	S	2	2	0.11
2966	GTF2H2	S	4	5	0.91	S	2	3	0.08	S	4	6	0.96	A	2	2	0.008	S	4	7	0.89	S	4	4	0.24	S	5	6	1.1	S	6	8	0.2	S	6	9	1.1	S	5	5	0.27	S	2	4	0.68	S	2	2	0.03
728340	GTF2H2C	S	4	5	0.91	S	2	3	0.08	S	4	6	0.96	A	2	2	0.008	S	4	7	0.89	S	4	4	0.24	S	5	6	1.1	S	6	8	0.2	S	6	9	1.1	S	5	5	0.27	S	2	4	0.68	S	2	2	0.03
730394	GTF2H2C_2	S	4	5	0.91	S	2	3	0.08	S	4	6	0.96	A	2	2	0.008	S	4	7	0.89	S	4	4	0.24	S	5	6	1.1	S	6	8	0.2	S	6	9	1.1	S	5	5	0.27	S	2	4	0.68	S	2	2	0.03
6613	SUMO2	S	1	2	0.2	S	1	1	0.07	S	1	2	0.23	S	1	2	0.1	S	1	1	0.35	S	1	1	0	S	1	1	0.2	S	1	1	0	S	1	1	0.22	S	1	4	0.08	S	1	1	0.28	A	1	2	0
387082	SUMO4	S	1	2	0.15	S	1	1	0.05	S	1	2	0.17	S	1	2	0.08	S	1	1	0.26	S	1	1	0	S	1	1	0.15	S	1	1	0	S	1	1	0.16	S	1	4	0.06	S	1	1	0.21	A	1	2	0
3018	HIST1H2BB	S	5	19	33.8	S	4	20	4.6	S	3	13	5.1	S	4	15	8.1	S	3	12	4.9	S	3	14	7.1	S	3	27	21	S	5	13	9.5	S	5	24	23	S	4	22	4.3	A	3	22	0	S	4	19	6.4
8348	HIST1H2BO	S	5	19	33.8	S	4	20	4.6	S	3	13	5.1	S	4	15	8.1	S	3	12	4.9	S	3	14	7.1	S	3	27	21	S	5	13	9.5	S	5	24	23	S	4	22	4.3	A	3	22	0	S	4	19	6.4
8349	HIST2H2BE	S	5	19	33.8	S	4	20	4.6	S	3	13	5.1	S	4	15	8.1	S	3	12	4.9	S	3	14	7.1	S	3	27	21	S	5	13	9.5	S	5	24	23	S	4	22	4.3	A	3	22	0	S	4	19	6.4
8970	HIST1H2BJ	S	5	19	33.8	S	4	20	4.6	S	3	13	5.1	S	4	15	8.1	S	3	12	4.9	S	3	14	7.1	S	3	27	21	S	5	13	9.5	S	5	24	23	S	4	22	4.3	A	3	22	0	S	4	19	6.4
1457	CSNK2A1	S	3	8	0.38	S	4	7	0.17	R	1	4	0.19	S	4	8	0.29	R	1	2	0.09	S	4	6	0.31	S	3	7	0.41	S	6	9	0.22		0	0	0	S	3	6	0.1	S	3	5	0.54	S	4	6	0.25
3012	HIST1H2AE	S	4	13	47.8	S	6	11	6.1	S	5	15	44.8	S	5	10	13	S	4	16	44.3	S	6	12	11	A	4	16	0	S	7	11	11.6	A	5	16	0	A	4	7	0	A	4	18	0	A	4	6	0
8334	HIST1H2AC	S	4	13	47.8	S	6	11	6.1	S	5	15	44.8	S	5	10	13	S	4	16	44.3	S	6	12	11	A	4	16	0	S	7	11	11.6	A	5	16	0	A	4	7	0	A	4	18	0	A	4	6	0
8335	HIST1H2AB	S	4	13	47.8	S	6	11	6.1	S	5	15	44.8	S	5	10	13	S	4	16	44.3	S	6	12	11	A	4	16	0	S	7	11	11.6	A	5	16	0	A	4	7	0	A	4	18	0	A	4	6	0
92815	HIST3H2A	S	4	13	47.8	S	6	11	6.1	S	5	15	44.8	S	5	10	13	S	4	16	44.3	S	6	12	11	A	4	16	0	S	7	11	11.6	A	5	16	0	A	4	7	0	A	4	18	0	A	4	6	0
7088	TLE1	A	1	1	0.04	S	2	3	0.02	S	1	3	0.02	S	2	3	0.02	S	1	3	0.02	A	2	3	0	S	1	1	0.03	A	1	1	0	A	2	2	0	S	1	2	0.01	S	1	1	0.02	A	1	2	0
7089	TLE2	A	1	1	0.04	S	2	3	0.02	S	1	3	0.03	S	2	3	0.02	S	1	3	0.02	A	2	3	0	S	1	1	0.03	A	1	1	0	A	2	2	0	S	1	2	0.01	S	1	1	0.02	A	1	2	0
7091	TLE4	A	1	1	0.04	S	2	3	0.02	S	1	3	0.02	S	2	3	0.02	S	1	3	0.02	A	2	3	0	S	1	1	0.03	A	1	1	0	A	2	2	0	S	1	2	0.01	S	1	1	0.02	A	1	2	0
3020	H3F3A	S	2	2	1.2	S	3	4	0.35	R	2	2	0.52	S	4	4	0.88		0	0	0	S	3	3	0.66	S	2	2	1.2	S	3	4	0.55	S	2	2	0.61	S	2	3	0.4	S	2	3	0.41	S	2	3	0.41
3021	H3F3B	S	2	2	1.2	S	3	4	0.35	R	2	2	0.52	S	4	4	0.88		0	0	0	S	3	3	0.66	S	2	2	1.2	S	3	4	0.55	S	2	2	0.61	S	2	3	0.4	S	2	3	0.41	S	2	3	0.41
8290	HIST3H3	S	2	2	1.2	S	3	4	0.35	R	2	2	0.52	S	4	4	0.88		0	0	0	S	3	3	0.66	S	2	2	1.2	S	3	4	0.55	S	2	2	0.61	S	2	3	0.4	S	2	3	0.41	S	2	3	0.41
8350	HIST1H3A	S	2	2	1.2	S	3	4	0.35	R	2	2	0.52	S	4	4	0.88		0	0	0	S	3	3	0.66	S	2	2	1.2	S	3	4	0.55	S	2	2	0.61	S	2	3	0.4	S	2	3	0.41	S	2	3	0.41
8351	HIST1H3D	S	2	2	1.2	S	3	4	0.35	R	2	2	0.52	S	4	4	0.88		0	0	0	S	3	3	0.66	S	2	2	1.2	S	3	4	0.55	S	2	2	0.61	S	2	3	0.4	S	2	3	0.41	S	2	3	0.41
8352	HIST1H3C	S	2	2	1.2	S	3	4	0.35	R	2	2	0.52	S	4	4	0.88		0	0	0	S	3	3	0.66	S	2	2	1.2	S	3	4	0.55	S	2	2	0.61	S	2	3	0.4	S	2	3	0.41	S	2	3	0.41
8353	HIST1H3E	S	2	2	1.2	S	3	4	0.35	R	2	2	0.52	S	4	4	0.88		0	0	0	S	3	3	0.66	S	2	2	1.2	S	3	4	0.55	S	2	2	0.61	S	2	3	0.4	S	2	3	0.41	S	2	3	0.41
8354	HIST1H3I	S	2	2	1.2	S	3	4	0.35	R	2	2	0.52	S	4	4	0.88		0	0	0	S	3	3	0.66	S	2	2	1.2	S	3	4	0.55	S	2	2	0.61	S	2	3	0.4	S	2	3	0.41	S	2	3	0.41
8355	HIST1H3G	S	2	2	1.2	S	3	4	0.35	R	2	2	0.52	S	4	4	0.88		0	0	0	S	3	3	0.66	S	2	2	1.2	S	3	4	0.55	S	2	2	0.61	S	2	3	0.4	S	2	3	0.41	S	2	3	0.41
8356	HIST1H3J	S	2	2	1.2	S	3	4	0.35	R	2	2	0.52	S	4	4	0.88		0	0	0	S	3	3	0.66	S	2	2	1.2	S	3	4	0.55	S	2	2	0.61	S	2	3	0.4	S	2	3	0.41	S	2	3	0.41
8357	HIST1H3H	S	2	2	1.2	S	3	4	0.35	R	2	2	0.52	S	4	4	0.88		0	0	0	S	3	3	0.66	S	2	2	1.2	S	3	4	0.55	S	2	2	0.61	S	2	3	0.4	S	2	3	0.41	S	2	3	0.41
8358	HIST1H3B	S	2	2	1.2	S	3	4	0.35	R	2	2	0.52	S	4	4	0.88		0	0	0	S	3	3	0.66	S	2	2	1.2	S	3	4	0.55	S	2	2	0.61	S	2	3	0.4	S	2	3	0.41	S	2	3	0.41
8968	HIST1H3F	S	2	2	1.2	S	3	4	0.35	R	2	2	0.52	S	4	4	0.88		0	0	0	S	3	3	0.66	S	2	2	1.2	S	3	4	0.55	S	2	2	0.61	S	2	3	0.4	S	2	3	0.41	S	2	3	0.41
126961	HIST2H3C	S	2	2	1.2	S	3	4	0.35	R	2	2	0.52	S	4	4	0.88		0	0	0	S	3	3	0.66	S	2	2	1.2	S	3	4	0.55	S	2	2	0.61	S	2	3	0.4	S	2	3	0.41	S	2	3	0.41
333932	HIST2H3A	S	2	2	1.2	S	3	4	0.35	R	2	2	0.52	S	4	4	0.88		0	0	0	S	3	3	0.66	S	2	2	1.2	S	3	4	0.55	S	2	2	0.61	S	2	3	0.4	S	2	3	0.41	S	2	3	0.41
653604	HIST2H3D	S	2	2	1.2	S	3	4	0.35	R	2	2	0.52	S	4	4	0.88		0	0	0	S	3	3	0.66	S	2	2	1.2	S	3	4	0.55	S	2	2	0.61	S	2	3	0.4	S	2	3	0.41	S	2	3	0.41
1024	CDK8	S	1	1	0.14	S	1	2	0.03	S	3	4	0.6	A	1	1	0	S	1	1	0.11	S	1	2	0.04		0	0	0	S	1	1	0.03		0	0	0	S	1	1	0.03	S	1	1	0.26	S	1	2	0.05
1746	DLX2	S	2	2	0.34	S	1	1	0	S	2	2	0.07		0	0	0	S	2	3	0.07	S	1	1	0	A	1	3	0		0	0	0	A	1	2	0	A	1	1	0	S	2	3	0.1		0	0	0
1749	DLX5	S	2	2	0.36	S	1	1	0	S	2	2	0.08		0	0	0	S	2	3	0.08	S	1	1	0	A	1	3	0		0	0	0	A	1	2	0	A	1	1	0	S	2	3	0.1		0	0	0
8019	BRD3	S	1	1	0.01	S	1	1	0	S	2	2	0.12		0	0	0	S	2	3	0.09		0	0	0	S	1	1	0.01		0	0	0	A	1	2	0	S	1	1	0	S	1	1	0.003	A	1	1	0
71	ACTG1	S	14	31	18.9	S	15	35	6.2	A	15	41	0	S	17	36	8.8	S	11	45	19.2	S	16	38	8.8	S	15	39	25	S	17	38	8.8	S	13	40	18.7	S	16	43	7.5	S	12	38	21.3	S	15	32	6.7
7307	U2AF1	R	1	1	0.11	S	1	1	0		0	0	0	A	1	1	0.04		0	0	0	S	1	1	0.05		0	0	0	S	2	4	0.16		0	0	0		0	0	0		0	0	0		0	0	0
8337	HIST2H2AA3	S	5	15	16.5	A	5	10	0	A	5	25	0	S	6	16	4.6	S	4	28	15.4	A	6	15	0	A	5	21	0	A	6	12	0	A	6	28	0	S	6	13	3.1	A	5	20	0	S	6	9	2
8338	HIST2H2AC	S	5	15	16.5	A	5	10	0	A	5	25	0	S	6	16	4.6	S	4	28	15.4	A	6	15	0	A	5	21	0	A	6	12	0	A	6	28	0	S	6	13	3.1	A	5	20	0	S	6	9	2
723790	HIST2H2AA4	S	5	15	16.5	A	5	10	0	A	5	25	0	S	6	16	4.6	S	4	28	15.4	A	6	15	0	A	5	21	0	A	6	12	0	A	6	28	0	S	6	13	3.1	A	5	20	0	S	6	9	2
7846	TUBA1A	S	17	62	140	A	21	90	0	A	17	108	0	S	19	70	26.7	A	17	126	0	A	22	92	0	A	18	94	0	A	21	72	0	A	18	116	0	S	15	73	22.2	S	17	105	174	A	18	89	0
7025	NR2F1	S	1	1	0.08	A	2	3	0	A	1	1	0	A	1	3	0	A	1	1	0	A	1	2	0		0	0	0	A	1	2	0		0	0	0	A	1	2	0	S	1	1	0.07	A	1	1	0
440093	H3F3C	S	2	2	1.2	A	1	1	0	A	1	1	0	A	2	2	0		0	0	0	A	1	1	0	A	1	1	0	A	1	2	0	A	1	1	0	A	1	1	0	A	1	1	0	A	1	1	0
1974	EIF4A2	A	1	1	0.08	A	3	3	0		0	0	0	A	2	6	0		0	0	0	A	4	10	0	S	1	1	0.04	A	5	6	0		0	0	0	A	4	7	0	S	1	1	0.07	A	5	10	0
22807	IKZF2	S	1	2	0.04		0	0	0	S	2	3	0.37	S	1	1	0	S	2	2	0.17	S	1	1	0	S	2	7	0.55	S	1	1	0	S	3	7	0.18		0	0	0	S	1	1	0.18	S	2	2	0.03
653125	GOLGA8K	S	1	1	0.01		0	0	0	S	1	1	0.02	R	1	1	0.02	S	2	3	0.08	S	1	1	0	S	1	1	0.03		0	0	0	S	1	3	0.02	S	1	1	0	S	1	2	0.03	S	1	1	0.008
653720	GOLGA8M	S	1	1	0.02		0	0	0	S	1	1	0.03	R	1	1	0.02	S	2	3	0.11	S	1	1	0	S	1	1	0.04		0	0	0	S	1	3	0.03	S	1	1	0	S	1	2	0.04	S	1	1	0.01
728498	GOLGA8H	S	1	1	0.01		0	0	0	S	1	1	0.02	R	1	1	0.02	S	2	3	0.08	S	1	1	0	S	1	1	0.03		0	0	0	S	1	3	0.02	S	1	1	0	S	1	2	0.03	S	1	1	0.008
653073	GOLGA8J	S	1	1	0.01		0	0	0	S	1	1	0.03	R	1	1	0.02	A	1	2	0	S	1	1	0	S	1	1	0.03		0	0	0	S	1	3	0.02	S	1	1	0	S	1	2	0.03	S	1	1	0.009
8554	PIAS1	S	1	1	0		0	0	0	S	1	1	0		0	0	0	S	1	1	0	S	1	1	0.02		0	0	0	S	2	2	0		0	0	0		0	0	0	S	1	1	0.02		0	0	0
9063	PIAS2	S	1	1	0		0	0	0	S	1	1	0		0	0	0	S	1	1	0	S	1	1	0.02		0	0	0	A	1	1	0		0	0	0		0	0	0	S	1	1	0.02		0	0	0
55723	ASF1B	R	1	1	0.52		0	0	0	R	1	1	0.78		0	0	0	R	1	1	0.67		0	0	0	R	1	1	0.9	A	1	2	0	S	1	1	0.88		0	0	0	S	1	1	0.78	A	1	1	0
5396	PRRX1	S	1	1	0.08		0	0	0	S	1	5	0.18		0	0	0	S	1	4	0.12		0	0	0	S	1	4	0		0	0	0	S	1	4	0		0	0	0	S	1	2	0.11		0	0	0
51450	PRRX2	S	1	1	0.09		0	0	0	S	1	5	0.19		0	0	0	S	1	4	0.13		0	0	0	S	1	4	0		0	0	0	S	1	4	0		0	0	0	S	1	2	0.12		0	0	0
6495	SIX1	S	1	2	0.1		0	0	0	S	1	1	0.1		0	0	0	A	1	1	0.09		0	0	0	S	1	1	0.11		0	0	0	S	1	2	0.1		0	0	0	S	1	1	0.09		0	0	0
10736	SIX2	S	1	2	0.1		0	0	0	S	1	1	0.1		0	0	0	A	1	1	0.09		0	0	0	S	1	1	0.11		0	0	0	S	1	2	0.1		0	0	0	S	1	1	0.09		0	0	0
11217	AKAP2	S	1	1	1		0	0	0	S	1	2	1.1		0	0	0	S	1	1	0.68		0	0	0		0	0	0	A	1	1	0.04	S	1	1	1.1		0	0	0	S	1	2	0.9		0	0	0
445815	PALM2-AKAP2	S	1	1	0.81		0	0	0	S	1	2	0.82		0	0	0	S	1	1	0.53		0	0	0		0	0	0	A	1	1	0.03	S	1	1	0.88		0	0	0	S	1	2	0.7		0	0	0
22806	IKZF3	S	1	2	0.04		0	0	0	A	1	1	0		0	0	0	A	1	1	0	A	1	1	0	A	1	4	0		0	0	0	A	1	4	0		0	0	0		0	0	0		0	0	0
676	BRDT	S	1	1	0.007		0	0	0	A	1	1	0		0	0	0	A	1	1	0		0	0	0	S	1	1	0.007		0	0	0	A	1	2	0		0	0	0	S	1	1	0.002		0	0	0
10320	IKZF1	S	1	2	0.04		0	0	0	A	1	1	0		0	0	0	A	1	1	0		0	0	0	A	1	4	0		0	0	0	A	1	4	0	S	1	1	0.31		0	0	0		0	0	0
81	ACTN4	S	1	1	0		0	0	0		0	0	0		0	0	0		0	0	0		0	0	0	R	1	2	0		0	0	0		0	0	0		0	0	0		0	0	0	A	1	1	0
87	ACTN1	S	1	1	0		0	0	0		0	0	0		0	0	0		0	0	0		0	0	0	R	1	2	0		0	0	0		0	0	0		0	0	0		0	0	0	A	1	1	0
7291	TWIST1	S	1	1	0.11		0	0	0		0	0	0		0	0	0		0	0	0		0	0	0	S	1	1	0		0	0	0		0	0	0		0	0	0		0	0	0		0	0	0
117581	TWIST2	S	1	1	0.12		0	0	0		0	0	0		0	0	0		0	0	0		0	0	0	S	1	1	0		0	0	0		0	0	0		0	0	0		0	0	0		0	0	0
9083	BPY2	A	1	1	0.64		0	0	0		0	0	0		0	0	0		0	0	0		0	0	0		0	0	0		0	0	0	S	1	1	0.33		0	0	0		0	0	0		0	0	0
442867	BPY2B	A	1	1	0.64		0	0	0		0	0	0		0	0	0		0	0	0		0	0	0		0	0	0		0	0	0	S	1	1	0.33		0	0	0		0	0	0		0	0	0
442868	BPY2C	A	1	1	0.64		0	0	0		0	0	0		0	0	0		0	0	0		0	0	0		0	0	0		0	0	0	S	1	1	0.33		0	0	0		0	0	0		0	0	0
26052	DNM3	A	4	5	0	S	5	10	0.03	S	2	2	0.12	S	8	11	0.16	S	3	3	0.03	S	8	8	0.13	S	2	3	0.1	S	6	8	0.09	S	5	6	0.13	A	3	4	0	S	6	7	0.2	S	7	11	0.22
51460	SFMBT1	A	1	1	0	S	3	4	0.06	R	3	4	0.11	S	3	5	0.03	S	2	3	0.01	A	1	1	0	S	3	4	0.2	S	2	2	0.04	A	1	1	0		0	0	0	A	2	2	0		0	0	0
3860	KRT13	A	4	8	0	S	8	21	8	S	5	11	0.3	S	6	18	0.44	A	3	10	0	S	18	51	8.8	S	4	5	2.4	S	12	30	3.9	S	4	8	0.71	S	10	22	0.47	S	5	10	0.42	S	11	24	0.73
7072	TIA1	A	1	3	0	S	4	8	1.2	S	4	7	0.27	A	1	5	0	A	2	3	0	S	4	10	1.4	S	2	5	4.2	S	4	6	1.5	S	2	4	0.18	A	2	7	0	A	3	8	0	A	3	5	0
347688	TUBB8	A	7	35	0	S	9	54	16.1	A	7	34	0	S	8	60	0.38	A	8	56	0	S	8	77	25.8	S	7	50	82.4	S	8	39	34.1	S	10	59	41.1	A	6	53	0	S	9	55	0.27	A	8	69	0
1106	CHD2	A	2	3	0	S	4	8	0.22	A	1	3	0	S	10	14	0.08	A	1	3	0	S	7	8	0.17	S	3	5	1.2	S	6	7	0.09	A	1	2	0	S	7	8	0.34	A	2	4	0	S	11	15	0.13
51616	TAF9B	A	1	1	0	S	6	9	0.23	A	1	1	0	S	6	10	0.33	A	1	1	0	S	5	7	0.2	A	2	5	0	S	7	12	0.33	S	3	4	0.69	S	6	9	0.05	A	2	5	0	S	3	4	0.08
3188	HNRNPH2	A	2	4	0	S	5	7	0.17	A	2	4	0	S	5	8	0.19	A	2	4	0	S	4	8	0.08	A	2	7	0	S	4	8	1.5	A	2	6	0	S	4	7	1	A	2	4	0	S	5	10	1.9
79861	TUBAL3	A	4	8	0	S	5	16	1.5	A	5	17	0	S	5	11	1.2	A	4	12	0	A	4	9	0	A	4	10	0	A	4	8	0	A	5	15	0	S	4	8	0.83	A	3	9	0	A	4	17	0
3850	KRT3	A	5	8	0	S	13	30	1.1	A	4	13	0	A	8	14	0	S	5	8	2.8	S	15	35	3	R	4	6	2.3	S	11	21	0.08	A	1	2	0	S	8	13	0.53	A	4	8	0	S	9	19	0.64
121391	KRT74	A	2	3	0	S	4	6	0.02	A	2	11	0	A	3	5	0	A	1	3	0	S	5	16	0.09	A	2	3	0	S	5	9	0.13	A	1	2	0	S	4	5	0.22	A	2	6	0	S	4	9	0.09
4774	NFIA	A	2	2	0	S	4	5	0.59	A	1	2	0	A	1	2	0	A	1	1	0	A	1	1	0	A	2	8	0	S	2	2	0.78	A	1	2	0	A	1	1	0	A	1	1	0	S	2	2	0.69
26038	CHD5	A	17	56	0	S	26	61	3.2	A	22	58	0	A	23	62	0	A	18	61	0	A	22	52	0	A	17	42	0	A	23	55	0	A	20	59	0	A	22	52	0	A	23	64	0	S	20	54	0.05
128312	HIST3H2BB	A	4	18	0	S	4	20	4.6	S	3	13	5.1	S	4	15	8.1	S	3	12	4.9	S	3	14	7.1	A	2	26	0	A	4	12	0	A	4	23	0	A	3	21	0	A	2	20	0	A	3	18	0
58	ACTA1	A	9	17	0	S	10	25	2.2	A	9	23	0	S	13	27	3.2	A	7	27	0	S	12	28	4.6	A	9	22	0	S	12	29	2.6	A	8	26	0	A	10	25	0	A	8	20	0	S	10	19	2
70	ACTC1	A	9	17	0	S	10	25	2.2	A	9	23	0	S	13	27	3.2	A	7	27	0	S	12	28	4.6	A	9	22	0	S	12	29	2.6	A	8	26	0	A	10	25	0	A	8	20	0	S	10	19	2
7404	UTY	A	4	5	0	S	3	3	0.008	A	4	4	0	A	5	5	0	A	2	2	0	S	1	2	0.03	A	3	4	0	A	1	1	0	S	3	3	0.06	A	2	2	0	A	3	3	0	S	2	3	0.006
23635	SSBP2	A	2	2	0	S	1	1	0.07	A	1	2	0	A	1	1	0	A	1	2	0	A	1	1	0	A	1	3	0	S	2	2	0.1	A	1	4	0	A	1	2	0		0	0	0	S	1	3	0.06
23648	SSBP3	A	2	2	0	S	1	1	0.06	A	1	2	0	A	1	1	0	A	1	2	0	A	1	1	0	A	1	3	0	S	2	2	0.09	A	1	4	0	A	1	2	0		0	0	0	S	1	3	0.06
1387	CREBBP	A	2	2	0	R	1	1	0	A	2	5	0	A	2	2	0		0	0	0	A	1	1	0	A	1	1	0		0	0	0		0	0	0		0	0	0	A	1	2	0	S	2	2	0.001
5052	PRDX1	A	1	2	0	S	1	1	0.01		0	0	0	A	1	1	0.01		0	0	0		0	0	0		0	0	0		0	0	0		0	0	0		0	0	0	S	1	1	0.16		0	0	0
85446	ZFHX2	A	1	1	0	A	1	1	0	S	2	2	0.05	A	1	2	0	A	1	1	0	A	1	1	0	S	2	3	0.04	A	1	2	0	A	1	2	0	A	1	2	0	S	2	3	0.03	S	2	4	0.03
7532	YWHAG	A	1	2	0	A	2	4	0	R	1	1	0.05	S	4	6	0.19	A	1	1	0.05	A	2	7	0		0	0	0	S	3	8	0.51		0	0	0	A	2	6	0	A	1	1	0	A	4	8	0
27303	RBMS3	A	1	2	0	A	1	1	0	S	1	3	0.36	S	1	2	0.04	S	1	4	0.45	A	1	2	0	S	1	2	0.53	S	1	2	0.13	A	1	3	0	S	1	2	0.1	A	1	2	0	S	1	2	0.09
10971	YWHAQ	A	1	2	0	A	2	4	0	R	1	1	0.06	A	3	5	0	A	1	1	0.05	A	2	7	0	A	1	2	0	A	2	7	0		0	0	0	A	2	6	0	A	1	1	0	S	5	9	0.6
7533	YWHAH	A	1	2	0	A	2	4	0	R	1	1	0.05	A	3	5	0	A	1	1	0.05	A	2	7	0		0	0	0	A	2	7	0		0	0	0	A	2	6	0	S	2	2	4	A	4	8	0
3890	KRT84	A	2	3	0	A	4	12	0	A	3	12	0	S	5	9	0.21	S	3	5	0.25	A	4	9	0	S	5	6	0.43	S	5	7	0.18	S	2	3	0.26	A	4	6	0	S	4	8	0.34	S	10	18	0.39
345651	ACTBL2	A	4	11	0	A	4	14	0	A	4	15	0	S	6	16	9.7	S	4	16	21.1	A	5	16	0	A	3	14	0	A	5	16	0	S	4	18	22.5	A	5	13	0	S	5	14	25.6	A	5	11	0
3306	HSPA2	A	10	33	0	A	11	32	0	A	9	35	0	S	12	28	10.4	A	10	54	0	S	13	28	0.55	A	10	33	0	A	11	19	0	A	10	38	0	A	13	20	0	A	10	32	0	A	11	24	0
79009	DDX50	A	2	4	0	A	3	5	0	A	2	4	0	S	4	9	1.2	A	2	5	0	A	2	4	0	A	3	4	0	S	4	5	0.95	A	3	4	0	A	3	4	0	A	1	1	0	A	3	6	0
1759	DNM1	A	4	5	0	A	3	8	0	A	3	6	0	S	5	7	0.02	A	2	2	0	A	4	4	0	A	3	4	0	A	3	4	0	A	4	5	0	A	2	3	0	A	4	6	0	A	3	7	0
3855	KRT7	A	3	4	0	A	4	12	0	A	3	12	0	S	5	9	0.08	A	3	6	0	A	5	10	0	A	2	3	0	A	4	6	0	A	1	2	0	A	4	6	0	A	4	8	0	A	4	10	0
196374	KRT78	A	1	1	0	A	2	7	0	A	2	2	0	S	3	3	0.1		0	0	0	S	4	7	0.46		0	0	0	S	4	7	0.02		0	0	0	A	2	4	0		0	0	0	A	2	3	0
4286	MITF	A	2	3	0	A	2	2	0	A	1	1	0	S	3	3	0.26	S	2	2	0.65		0	0	0	A	1	2	0		0	0	0	A	1	1	0	A	1	1	0	A	1	1	0	S	2	2	0.09
84790	TUBA1C	A	16	59	0	A	21	90	0	A	16	105	0	S	19	70	26.7	A	15	119	0	A	22	92	0	A	18	93	0	A	21	72	0	A	18	115	0	S	15	73	22.2	A	16	104	0	A	18	89	0
7024	TFCP2	A	1	1	0	A	1	1	0	A	1	2	0	S	2	3	4.7	A	1	2	0		0	0	0		0	0	0	A	1	1	0	A	1	2	0	A	1	1	0	A	1	3	0	A	1	1	0
6926	TBX3	A	1	5	0	A	1	3	0	A	2	6	0	A	1	6	0	S	2	6	0.02	A	2	7	0	A	1	5	0	A	1	2	0	S	4	12	0.08	A	2	4	0	A	1	7	0	A	1	5	0
7277	TUBA4A	A	10	41	0	A	15	64	0	A	12	83	0	A	13	45	0	A	12	97	0	S	17	62	74	A	14	78	0	A	16	51	0	A	14	90	0	A	9	48	0	A	10	80	0	A	13	65	0
139804	RBMXL3	A	1	1	0	A	1	1	0	A	1	2	0	A	1	2	0	A	1	2	0	S	2	3	0.09	A	1	1	0	A	1	1	0	A	1	1	0	A	1	3	0	A	1	2	0	A	1	2	0
4087	SMAD2	A	1	1	0	A	1	1	0	A	1	1	0	A	1	1	0	A	1	2	0	S	1	1	0	A	1	1	0	A	1	2	0		0	0	0		0	0	0		0	0	0	A	1	2	0
353288	KRT26	A	1	7	0	A	1	21	0	A	1	5	0	A	1	11	0	A	1	9	0	A	1	10	0	S	2	9	0.62	A	1	7	0	A	1	8	0	A	1	4	0	A	1	7	0	A	1	8	0
440563	HNRNPCL2	A	4	5	0	A	6	14	0	A	4	7	0	A	6	11	0	A	4	6	0	A	6	14	0	S	5	6	0.12	A	6	8	0	A	4	6	0	A	8	14	0	A	4	7	0	A	7	13	0
51087	YBX2	A	2	2	0	A	3	3	0	A	2	3	0	A	3	3	0	A	2	3	0	A	2	2	0	S	4	7	3.7	A	4	5	0	A	3	6	0	A	2	2	0	A	1	1	0	A	2	2	0
8653	DDX3Y	A	1	1	0	A	3	6	0	A	1	1	0	A	4	5	0	A	2	2	0	A	4	6	0	R	1	1	0.02	A	6	9	0	S	2	3	0.17	A	4	7	0	S	1	1	0.007	A	5	11	0
286887	KRT6C	A	19	36	0	A	40	106	0	A	17	37	0	A	17	39	0	A	12	20	0	A	19	56	0	S	8	14	4.2	A	18	30	0	S	6	12	3.3	S	19	44	3.8	A	16	35	0	A	21	50	0
3866	KRT15	A	4	7	0	A	8	20	0	A	5	12	0	A	6	12	0	A	3	7	0	A	10	29	0	S	5	7	2.1	A	10	19	0	A	5	7	0	S	9	17	0.17	S	6	14	4.7	A	8	17	0
7280	TUBB2A	A	15	73	0	A	17	128	0	A	12	59	0	A	16	150	0	A	13	105	0	A	17	166	0	A	14	119	0	S	17	85	35.6	A	17	108	0	S	15	126	19.4	A	14	111	0	A	19	170	0
347733	TUBB2B	A	15	73	0	A	17	128	0	A	12	59	0	A	16	150	0	A	13	105	0	A	17	166	0	A	14	119	0	S	17	85	35.6	A	17	108	0	S	15	126	19.4	A	14	111	0	A	19	170	0
83759	RBM4B	A	5	7	0	A	3	4	0	A	1	1	0	A	5	8	0	A	2	3	0	A	5	6	0	A	3	8	0	S	3	4	0.1	A	3	4	0	A	4	7	0	S	4	8	0.95	A	4	6	0
445582	POTEE	A	4	9	0	A	4	10	0	A	4	8	0	A	4	11	0	A	4	13	0	A	5	13	0	A	4	14	0	S	5	12	0.42	A	4	14	0	A	3	13	0	A	4	11	0	A	4	9	0
728378	POTEF	A	4	9	0	A	4	10	0	A	4	8	0	A	4	11	0	A	4	13	0	A	5	13	0	A	4	14	0	S	5	12	0.41	A	4	14	0	A	3	13	0	A	4	11	0	A	4	9	0
5990	RFX2	A	1	2	0	A	1	1	0	A	1	4	0	A	1	1	0	A	1	1	0	A	1	4	0	A	1	1	0	A	1	4	0	S	2	3	0.15	A	1	2	0	S	2	2	0.05	A	2	5	0
10381	TUBB3	A	11	52	0	A	14	88	0	A	9	52	0	A	13	96	0	A	10	77	0	A	14	104	0	A	12	81	0	A	15	61	0	S	15	77	140	A	13	87	0	A	11	75	0	A	14	110	0
339488	TFAP2E	A	7	16	0	A	5	41	0	A	4	9	0	A	4	30	0	A	6	12	0	A	4	10	0	A	5	11	0	A	6	11	0	S	9	23	32.5	A	5	19	0	A	5	18	0	A	5	25	0
10472	ZBTB18	A	2	2	0	A	2	3	0	A	1	1	0	A	1	1	0	A	1	1	0	A	1	2	0	A	1	1	0	A	1	1	0	S	2	3	0.12	A	1	1	0	A	2	2	0	A	1	1	0
140690	CTCFL	A	2	3	0	A	2	11	0	A	2	4	0	A	2	9	0	A	2	2	0	A	2	7	0	A	2	5	0	A	2	11	0	A	2	4	0	S	3	6	1.8	A	2	4	0	S	3	7	0.31
192666	KRT24	A	2	3	0	A	2	4	0	A	1	1	0	A	2	6	0	A	1	2	0	A	2	3	0	A	1	1	0	A	2	4	0	A	1	1	0	S	2	3	0.02	A	1	3	0	A	2	3	0
51350	KRT76	A	5	7	0	A	10	27	0	A	4	13	0	A	7	13	0	A	4	6	0	A	9	20	0	A	4	7	0	A	6	9	0	A	2	3	0	S	7	12	1.2	S	5	9	4.5	A	7	15	0
7544	ZFY	A	4	7	0	A	4	5	0	A	4	7	0	A	4	6	0	A	3	6	0	A	2	3	0	A	1	3	0	A	4	7	0	A	4	10	0	S	4	6	0.57	A	3	7	0	A	3	6	0
3881	KRT31	A	1	2	0	A	1	1	0	A	1	1	0	A	1	3	0		0	0	0	A	2	3	0	A	1	1	0	A	1	1	0	A	1	1	0	A	1	2	0	A	1	3	0	S	2	3	0.26
3884	KRT33B	A	1	2	0	A	1	1	0	A	1	1	0	A	1	3	0		0	0	0	A	2	3	0	A	1	1	0	A	1	1	0	A	1	1	0	A	1	2	0	A	1	3	0	S	2	3	0.25
3882	KRT32	A	1	2	0	A	1	1	0	A	1	1	0	A	1	3	0		0	0	0	A	1	2	0	A	1	1	0	A	1	1	0	A	1	1	0	A	1	2	0	A	1	3	0	S	2	3	0.24
8687	KRT38	A	1	2	0	A	1	1	0	A	1	1	0	A	1	3	0		0	0	0	A	1	2	0	A	1	1	0	A	1	1	0	A	1	1	0	A	1	2	0	A	1	3	0	S	2	3	0.26
8689	KRT36	A	1	2	0	A	1	1	0	A	1	1	0	A	1	3	0		0	0	0	A	1	2	0	A	1	1	0	A	1	1	0	A	1	1	0	A	1	2	0	A	1	3	0	S	2	3	0.24
2103	ESRRB	A	1	3	0	A	1	3	0		0	0	0	S	1	2	0.02		0	0	0	S	1	2	0.01	A	1	4	0	A	1	1	0	A	1	4	0	S	1	4	0.03	A	1	3	0	S	1	2	0.01
161	AP2A2	A	1	1	0	A	3	5	0		0	0	0	A	1	1	0	A	2	4	0	A	1	1	0	A	1	1	0	S	4	7	0.005		0	0	0	S	3	4	0.07	A	1	1	0	A	2	2	0
6599	SMARCC1	A	1	5	0		0	0	0	A	1	1	0	S	3	3	0.01		0	0	0	S	6	6	0.07	S	2	2	0.03	A	2	2	0	S	2	4	0.04	A	2	2	0	S	1	1	0.01	A	2	2	0
29841	GRHL1	A	1	2	0		0	0	0	A	1	3	0	A	3	6	0	A	1	4	0	A	2	2	0	A	1	14	0	A	1	1	0	S	2	10	0.13	A	1	1	0	S	3	20	0.04	A	1	2	0
5089	PBX2	A	1	3	0		0	0	0	A	1	3	0		0	0	0	A	1	2	0	S	1	1	0	S	2	4	0.56	S	1	1	0	A	1	6	0		0	0	0	A	1	5	0		0	0	0
29979	UBQLN1	A	2	2	0		0	0	0		0	0	0	A	1	1	0		0	0	0	A	1	1	0.17		0	0	0	A	1	2	0.13	S	2	2	0.74	S	1	1	0.09		0	0	0	A	1	1	0.08
23633	KPNA6	A	1	1	0		0	0	0		0	0	0		0	0	0		0	0	0	S	2	2	0.03		0	0	0	R	1	1	0		0	0	0	A	1	1	0		0	0	0	S	3	4	0
3841	KPNA5	A	1	1	0		0	0	0		0	0	0		0	0	0		0	0	0	A	1	1	0		0	0	0		0	0	0		0	0	0	S	2	2	0.18		0	0	0	A	1	1	0
57567	ZNF319		0	0	0	S	3	4	0.21	S	3	3	0.7	S	3	3	0.22	S	1	1	0.46	S	2	2	0.16	S	1	2	0.46	A	1	1	0.1	S	1	1	0.33	S	4	4	0.31	S	1	1	0.24	S	3	3	0.12
7534	YWHAZ		0	0	0	S	4	8	0.1	S	1	1	0.23	S	5	7	0.28	S	1	3	0.22	S	5	10	0.44	S	2	4	0.35	S	6	11	1.1	S	2	4	0.35	S	3	7	0.3	S	2	3	0.35	S	7	11	1
23389	MED13L		0	0	0	S	1	2	0.01	S	5	7	0.12	S	6	9	0.06	S	1	2	0.01	S	2	2	0.009	S	2	6	0.02	S	1	4	0	S	2	2	0.02	S	3	6	0.001	S	5	7	0.13	S	7	11	0.03
84248	FYTTD1		0	0	0	S	1	1	0	S	4	5	0.37	S	4	4	0.07	S	1	1	0.24	S	1	2	0.03	S	1	2	0.13	S	2	4	0.11	S	1	3	0.13	S	2	2	0.09	S	2	2	0.09	S	2	3	0
3430	IFI35		0	0	0	S	4	4	0.11	S	2	5	0.04	S	3	3	0.28	S	1	4	0.43	S	3	5	0.27	S	1	4	0.19	S	2	6	0.22	S	2	3	0	S	2	6	0.14	S	2	2	0.05	S	4	5	0.16
6879	TAF7		0	0	0	S	2	3	0.14	S	1	1	0.11	S	1	1	0.12	S	1	1	0.14	S	3	3	0.15	S	1	1	0.25	S	3	3	0.21	S	1	1	0.13		0	0	0	S	2	2	0.26	S	1	1	0
7186	TRAF2		0	0	0	S	1	2	0.02	S	1	1	0.05	S	1	1	0.04	S	1	1	0.06	S	1	2	0.04	S	1	2	0.03	S	1	1	0.03		0	0	0	S	1	2	0.03	S	1	2	0.09	S	1	1	0.03
23243	ANKRD28		0	0	0	S	3	3	0.01	A	1	1	0.06	S	2	2	0.02	S	2	2	0.08	S	4	9	0.1	S	1	1	0.04	S	4	6	0.008		0	0	0	S	2	3	0.01	S	2	2	0.14	S	2	2	0.02
7531	YWHAE		0	0	0	S	3	5	0.02	S	1	3	0	S	6	8	0.34	S	1	1	0.2	S	5	11	0.34	S	1	1	0.37	S	4	10	0.56		0	0	0	S	5	11	0.2	A	1	1	0	S	7	13	0.47
9493	KIF23		0	0	0	S	4	5	0.01	S	1	1	0	S	3	3	0.05	R	2	2	0.06	S	5	9	0.12	S	2	2	0.08	S	5	7	0.04		0	0	0		0	0	0		0	0	0	S	3	6	0.02
1960	EGR3		0	0	0	S	1	2	0.08	S	2	8	2	R	1	2	0.16	S	3	9	1.5	R	1	2	0	A	1	1	0	S	1	2	0.15	S	1	3	1.2	S	1	2	0.17	S	1	2	1.5	R	1	2	0.1
29890	RBM15B		0	0	0	S	5	7	0.05	S	1	1	0	S	2	2	0.009	S	1	2	0	S	2	2	0.05		0	0	0	S	5	7	0.04	S	2	2	0.02	S	2	2	0.03	S	1	1	0.01	S	4	7	0.13
79718	TBL1XR1		0	0	0	S	2	7	0	R	1	1	0.15	S	3	4	0	S	1	1	0.13	S	2	3	0.08		0	0	0	S	3	3	0.09		0	0	0	S	3	4	0.03		0	0	0	S	3	4	0.02
9092	SART1		0	0	0	S	1	1	0	R	1	1	0.02	S	1	3	0.01	A	1	3	0.6	S	2	3	0.03		0	0	0	S	2	2	0		0	0	0	S	1	2	0		0	0	0	S	2	3	0.06
55756	INTS9		0	0	0	S	4	4	0.09	A	1	1	0.01	A	1	1	0.02	A	1	1	0.11	S	1	1	0		0	0	0	S	1	1	0		0	0	0		0	0	0		0	0	0	R	1	1	0
545	ATR		0	0	0	A	1	1	0	A	1	1	0.45	A	1	1	0	A	1	1	0		0	0	0		0	0	0		0	0	0		0	0	0	S	1	2	0.06		0	0	0		0	0	0
10933	MORF4L1		0	0	0	S	2	2	0.09	R	1	1	0.04	S	3	4	0.07	A	1	1	0	S	4	5	0.07		0	0	0	S	3	3	0.13		0	0	0	S	3	3	0.05		0	0	0	S	4	6	0.04
8161	COIL		0	0	0	S	5	7	0.18	S	1	2	0.15	S	3	4	0.32		0	0	0	S	4	6	0.28	R	1	2	0.15	S	8	10	0.48		0	0	0	S	4	4	0.23		0	0	0	S	7	11	0.2
5976	UPF1		0	0	0	S	1	1	0	R	1	1	0.11	S	2	2	0		0	0	0	R	3	3	0	S	1	1	0	S	3	3	0		0	0	0	S	1	1	0.008		0	0	0	S	5	7	0.05
892	CCNC		0	0	0	R	2	2	2.4	R	1	1	2.1	S	1	1	0.35		0	0	0	R	1	1	0.14		0	0	0	R	1	1	0		0	0	0	S	1	1	0	S	1	1	0.19	S	1	1	0.05
10847	SRCAP		0	0	0	S	3	3	0.5	R	1	1	0.01	S	3	5	0.0005		0	0	0	S	5	5	0.01		0	0	0	R	2	2	0.003		0	0	0	S	3	5	0.004		0	0	0	S	7	7	0.03
54973	CPSF3L		0	0	0	S	1	2	0	R	2	2	0.19	S	2	5	0.08		0	0	0	S	1	2	0.06		0	0	0	S	3	4	0.19		0	0	0	S	2	3	0.09		0	0	0	S	1	2	0.04
23644	EDC4		0	0	0	R	2	2	0.01	R	1	1	0.06	R	1	1	0.009		0	0	0	S	2	2	0.03		0	0	0	S	1	2	0.002		0	0	0	S	1	1	0		0	0	0	S	2	3	0.06
10493	VAT1		0	0	0	A	1	1	2.2	A	1	1	13.3	A	1	3	3.6		0	0	0		0	0	0		0	0	0	A	1	1	3.7	S	1	1	16		0	0	0		0	0	0	A	1	2	1.7
55297	CCDC91		0	0	0	R	1	3	0.78	A	1	1	0.44	R	1	1	0.49		0	0	0		0	0	0		0	0	0		0	0	0		0	0	0		0	0	0	S	1	2	0.38	R	1	1	0.01
7874	USP7		0	0	0	A	1	1	0	S	1	1	0.01		0	0	0	S	1	3	0	S	2	5	0.003	A	1	1	0	A	1	1	0	S	2	5	0.05	S	1	2	0	S	1	1	0.02	S	1	3	0.005
84464	SLX4		0	0	0	S	2	2	0	S	1	1	0		0	0	0	S	1	1	0	S	1	1	0	S	2	4	0.06	S	2	3	0.008	S	2	4	0.03	S	2	2	0		0	0	0	S	4	6	0.02
652968	GATSL3		0	0	0	A	1	1	0.03	R	1	1	8.9		0	0	0	S	1	3	1.4	S	1	1	8.7	A	1	1	10.3	S	1	2	11	S	1	1	10		0	0	0		0	0	0	S	1	2	11.8
302	ANXA2		0	0	0	S	2	2	0	S	4	5	0.58		0	0	0	S	2	3	0.3	S	3	4	0.07	S	2	2	0.12		0	0	0	S	2	2	0.11	S	1	1	0	S	2	2	0.06	R	1	1	0
81627	TRMT1L		0	0	0	A	1	1	0.17	A	1	1	0.05		0	0	0	R	1	1	0.11	R	1	1	0.27		0	0	0		0	0	0	S	1	3	0.05		0	0	0	S	1	2	0.95		0	0	0
392275	SMPD5		0	0	0	A	1	1	0.71	A	1	2	0.39		0	0	0	A	1	3	0.04		0	0	0	A	1	1	0.33		0	0	0	S	2	2	1.3		0	0	0	S	1	3	0.22		0	0	0
2017	CTTN		0	0	0	S	3	4	0.05	S	1	1	0.02		0	0	0		0	0	0	R	1	1	0		0	0	0	S	7	8	0.11		0	0	0	S	1	1	0.05		0	0	0	S	5	6	0.05
8853	ASAP2		0	0	0	S	1	1	0.02	A	1	1	1.2		0	0	0		0	0	0	S	1	1	0.05		0	0	0	S	1	2	0.03		0	0	0	S	1	1	0.01		0	0	0	S	1	1	0.05
23144	ZC3H3		0	0	0	S	2	2	0	A	1	1	0.13		0	0	0		0	0	0	S	1	1	0		0	0	0		0	0	0		0	0	0	S	1	1	0	S	2	2	0.14	S	1	1	0
22834	ZNF652		0	0	0	S	2	2	0.03	S	1	1	0.08		0	0	0		0	0	0		0	0	0		0	0	0	S	2	2	0.05		0	0	0	S	1	1	0.03	S	1	1	0.17	A	1	1	0
205327	C2orf69		0	0	0	S	1	1	0	A	1	1	0		0	0	0		0	0	0		0	0	0		0	0	0	A	1	1	0		0	0	0		0	0	0	S	2	2	0.03		0	0	0
170506	DHX36		0	0	0	S	1	1	0.003	S	1	1	0.01		0	0	0		0	0	0		0	0	0		0	0	0		0	0	0	S	1	1	0		0	0	0		0	0	0		0	0	0
7776	ZNF236		0	0	0	A	1	1	0	R	1	1	0		0	0	0		0	0	0		0	0	0		0	0	0		0	0	0		0	0	0	S	1	1	0		0	0	0		0	0	0
163	AP2B1		0	0	0	S	3	3	0.009	S	1	1	0.005	S	5	6	0.02	S	3	3	0.06	S	13	16	0.35	S	3	5	0.04	S	2	2	0	S	1	2	0.006	S	6	10	0.06		0	0	0	S	9	10	0.26
54856	GON4L		0	0	0	S	2	2	0.005	S	2	3	0.02		0	0	0	S	3	4	0.006	S	1	1	0.01	S	2	5	0.03		0	0	0	S	2	5	0.02		0	0	0	S	2	2	0.03	S	2	2	0
6595	SMARCA2		0	0	0	S	6	7	0.04	A	2	2	0	A	5	7	0	S	2	2	0.05	S	5	5	0.12	A	1	1	0	A	5	7	0	S	2	3	0.03	A	3	3	0	A	2	3	0	A	5	9	0
64207	IRF2BPL		0	0	0	S	2	3	0.03		0	0	0	S	1	4	0.02	R	2	2	0.08	S	2	3	0.01	S	2	2	0.03	S	1	4	0	S	2	2	0.02	S	2	3	0.02	S	1	1	0.02	S	3	7	0.08
3837	KPNB1		0	0	0	S	3	4	0.03		0	0	0	S	3	6	0.07	S	2	2	0.03	S	3	6	0.12	S	2	2	0.03	S	4	13	0.06	S	1	1	0.02	S	3	8	0.04		0	0	0	S	4	10	0.15
9919	SEC16A		0	0	0	S	6	10	0.03		0	0	0	S	6	7	0.02	S	1	1	0.007	S	7	11	0.04	R	1	2	0.006	S	7	10	0.01	S	1	1	0.006	S	7	10	0.02		0	0	0	S	14	17	0.2
7705	ZNF146		0	0	0	R	1	1	0.007		0	0	0	S	1	1	0	S	1	1	0.04	R	1	1	0.02	S	1	1	0.07	R	1	1	0.007	S	1	2	0	S	1	1	0.007		0	0	0	S	1	1	0
5903	RANBP2		0	0	0	S	13	14	0.02		0	0	0	S	8	12	0.02	A	1	1	0.21	S	9	12	0.06	S	2	3	0.01	S	8	11	0.02		0	0	0	S	8	9	0.04	S	1	1	0	S	35	49	0.22
23469	PHF3		0	0	0	R	1	1	0		0	0	0	S	2	2	0.004	R	2	2	0.02	R	3	3	0	S	1	1	0.01	S	5	5	0.02		0	0	0	S	4	6	0.003	S	1	1	0.02	S	6	8	0.02
9878	TOX4		0	0	0	S	5	8	0		0	0	0	S	1	2	0.09	R	1	1	0.02	S	3	5	0.36	S	2	2	0.09	S	8	11	0.24		0	0	0	S	1	3	0		0	0	0	S	4	4	0.3
9169	SCAF11		0	0	0	S	2	2	0.003		0	0	0	S	2	2	0.003	A	1	2	0.09	S	3	4	0.03	R	1	1	0.02	S	3	4	0		0	0	0	S	2	3	0		0	0	0	S	3	3	0.004
10238	DCAF7		0	0	0	S	1	2	0		0	0	0	A	1	1	0.09	R	1	1	0.11	S	2	3	0.08	S	1	2	0.17	S	1	1	0.07		0	0	0		0	0	0		0	0	0	S	2	2	0.39
27125	AFF4		0	0	0	S	6	8	0.05		0	0	0	S	5	6	0.15	S	1	1	0.05	S	3	4	0.23		0	0	0	S	6	7	0.15		0	0	0	S	3	7	0.1	S	1	1	0.07	S	2	3	0.12
1173	AP2M1		0	0	0	R	3	5	0.04		0	0	0	S	5	8	0.26	A	1	1	0.17	S	5	8	0.33		0	0	0	S	4	6	0.18		0	0	0	S	2	3	0.07		0	0	0	S	3	4	0.11
10569	SLU7		0	0	0	S	1	1	0		0	0	0	R	1	1	0	S	1	1	0	S	1	1	0.02		0	0	0	S	1	2	0.02		0	0	0		0	0	0		0	0	0	S	1	1	0
81930	KIF18A		0	0	0	R	1	1	0		0	0	0	S	1	1	0	S	2	2	0.06	S	1	4	0		0	0	0		0	0	0		0	0	0		0	0	0		0	0	0	S	2	2	0.02
9648	GCC2		0	0	0	R	1	1	0		0	0	0	S	1	1	0	S	1	1	0.01	S	2	5	0		0	0	0		0	0	0		0	0	0		0	0	0		0	0	0	S	2	2	0
430	ASCL2		0	0	0	S	1	1	0		0	0	0	S	1	3	0	S	1	2	0.07		0	0	0		0	0	0	S	1	4	0		0	0	0	S	2	2	0		0	0	0		0	0	0
2146	EZH2		0	0	0	R	1	1	0		0	0	0	A	1	1	0	A	1	1	0		0	0	0		0	0	0	S	1	1	0.03		0	0	0		0	0	0		0	0	0		0	0	0
51742	ARID4B		0	0	0	A	1	1	0.04		0	0	0	S	1	1	0	S	1	1	0.02		0	0	0		0	0	0	S	1	1	0		0	0	0		0	0	0		0	0	0		0	0	0
4771	NF2		0	0	0	A	1	1	0.03		0	0	0	S	2	2	0.001	S	2	2	0.15		0	0	0		0	0	0	R	1	1	0		0	0	0		0	0	0		0	0	0		0	0	0
54454	ATAD2B		0	0	0	S	2	3	0.006		0	0	0	S	3	4	0.04	A	1	1	0	S	2	3	0.02		0	0	0	S	2	4	0.008		0	0	0	S	1	1	0.005		0	0	0	S	4	6	0
29028	ATAD2		0	0	0	S	7	8	0.02		0	0	0	S	8	10	0.08	A	1	1	0	S	6	9	0.15		0	0	0	S	5	7	0.02		0	0	0	S	4	9	0.02		0	0	0	S	5	6	0.1
51602	NOP58		0	0	0	S	4	7	0.18		0	0	0	S	4	5	0.25		0	0	0	S	6	9	0.57	A	1	1	0.15	S	4	6	0.51	S	1	1	0.1	S	4	7	0.33		0	0	0	S	5	7	0.49
8379	MAD1L1		0	0	0	S	2	2	0		0	0	0	R	1	1	0.007		0	0	0	S	2	4	0.03	A	1	1	0.23	S	2	4	0.04	S	1	1	0.09	S	3	4	0.02		0	0	0	S	4	5	0
94015	TTYH2		0	0	0	A	1	2	0.03		0	0	0	A	1	3	0.05		0	0	0	A	1	1	0	R	1	6	0.32	A	1	3	0.2	S	1	4	0.58		0	0	0		0	0	0	R	1	1	0
9203	ZMYM3		0	0	0	S	2	3	0.009		0	0	0	A	1	1	0.008		0	0	0	S	3	4	0.05	R	1	1	0.04	S	2	2	0.07	A	1	1	0	S	3	3	0.01		0	0	0	S	7	10	0.02
1213	CLTC		0	0	0	S	4	5	0.003		0	0	0	S	3	6	0.0009		0	0	0	S	7	10	0.05	S	2	3	0	S	4	5	0.01		0	0	0	S	5	7	0.05	S	2	2	0.01	S	8	12	0.11
10528	NOP56		0	0	0	S	6	6	0.25		0	0	0	S	7	12	0.4		0	0	0	S	5	9	0.36	S	2	2	0.06	S	10	13	0.48		0	0	0	S	5	8	0.09	S	1	1	0	S	4	12	0.21
23524	SRRM2		0	0	0	S	8	12	0.02		0	0	0	S	15	25	0.13		0	0	0	S	13	23	0.28	S	1	3	0.02	S	10	18	0.06		0	0	0	S	10	17	0.11	S	1	1	0	S	13	18	0.13
79026	AHNAK		0	0	0	A	1	1	0		0	0	0	R	3	3	0.007		0	0	0	S	16	21	0.1	A	1	1	0.02	S	18	33	0.08		0	0	0	S	9	13	0.05	S	1	1	0.29	S	7	8	0.01
283337	ZNF740		0	0	0	S	3	3	0.16		0	0	0	S	3	5	0.34		0	0	0	S	2	5	0.07	S	1	2	0	S	3	4	0.15		0	0	0	S	2	4	0.13	S	1	1	0.22		0	0	0
10985	GCN1		0	0	0	S	40	52	0.18		0	0	0	S	20	23	0.1		0	0	0	S	38	58	0.36	S	3	4	0.03	S	19	21	0.08		0	0	0	S	25	34	0.2		0	0	0	S	77	129	2
23019	CNOT1		0	0	0	S	32	47	0.29		0	0	0	S	15	22	0.08		0	0	0	S	29	48	0.45	S	6	8	0.1	S	31	49	0.21		0	0	0	S	24	37	0.16		0	0	0	S	61	119	2.6
10576	CCT2		0	0	0	S	17	36	2		0	0	0	S	13	17	1.5		0	0	0	S	23	41	6.3	S	7	8	1.7	S	24	41	3.2		0	0	0	S	18	27	2.4		0	0	0	S	29	67	6.9
7203	CCT3		0	0	0	S	9	20	0.51		0	0	0	S	3	5	0.2		0	0	0	S	9	11	0.92	S	2	3	0.12	S	4	9	0.43		0	0	0	S	3	5	0.2		0	0	0	S	15	30	1.1
10575	CCT4		0	0	0	S	7	11	0.25		0	0	0	S	4	8	0.29		0	0	0	S	13	20	1	S	4	6	0.45	S	10	11	0.53		0	0	0	S	6	10	0.39		0	0	0	S	18	36	1.3
8805	TRIM24		0	0	0	S	1	4	0		0	0	0	S	1	2	0.03		0	0	0	S	1	1	0.03	S	1	2	0.03	S	1	1	0		0	0	0	S	1	1	0.03		0	0	0	S	1	2	0.05
54623	PAF1		0	0	0	S	2	2	0.02		0	0	0	S	1	1	0		0	0	0	S	2	2	0.08	S	2	3	0.12	S	3	7	0.1		0	0	0	S	1	2	0		0	0	0	S	4	6	0.12
8416	ANXA9		0	0	0	S	7	9	0.6		0	0	0	S	3	5	0.14		0	0	0	S	5	6	0.77	S	1	1	0.17	S	8	13	1.7		0	0	0	S	4	5	0.2		0	0	0	S	13	23	2.3
6730	SRP68		0	0	0	S	2	3	0		0	0	0	S	1	1	0		0	0	0	S	2	3	0.07	S	1	1	0	S	2	4	0.01		0	0	0	S	1	1	0		0	0	0	S	5	6	0.02
1994	ELAVL1		0	0	0	S	1	2	0.17		0	0	0	S	3	3	0.46		0	0	0	S	3	3	0.51	S	1	1	0.27	S	1	1	0.14		0	0	0	S	2	2	0.21		0	0	0	S	7	10	1.2
8189	SYMPK		0	0	0	S	5	5	0.03		0	0	0	S	6	9	0.15		0	0	0	S	8	13	0.19	R	1	1	0.003	S	5	7	0.03		0	0	0	S	5	5	0.05		0	0	0	S	13	19	0.34
55681	SCYL2		0	0	0	S	3	9	0.03		0	0	0	S	2	2	0		0	0	0	S	9	15	0.26	A	1	1	0	S	7	12	0.14		0	0	0	S	2	3	0.05		0	0	0	S	4	7	0.13
3070	HELLS		0	0	0	S	2	3	0.05		0	0	0	S	3	4	0.03		0	0	0	S	3	3	0.15	S	1	1	0	S	2	3	0.06		0	0	0	S	1	1	0.03		0	0	0	S	4	5	0.16
57418	WDR18		0	0	0	S	4	6	0.09		0	0	0	S	3	4	0.12		0	0	0	S	2	3	0.14	R	1	2	0.06	S	2	2	0.04		0	0	0	S	2	2	0.05		0	0	0	S	3	4	0.15
29127	RACGAP1		0	0	0	S	8	13	0.29		0	0	0	S	3	5	0.11		0	0	0	S	7	11	0.23	A	1	1	0.11	S	9	17	0.34		0	0	0	S	3	4	0.07		0	0	0	S	10	18	0.67
26145	IRF2BP1		0	0	0	S	2	3	0.06		0	0	0	R	1	1	0.04		0	0	0	S	3	3	0.03	S	1	1	0	S	3	3	0		0	0	0	S	1	5	0.07		0	0	0	S	6	6	0.38
23244	PDS5A		0	0	0	S	1	1	0		0	0	0	S	2	2	0.01		0	0	0	S	4	5	0.05	S	1	2	0	S	2	2	0		0	0	0	S	2	2	0.01		0	0	0	S	5	9	0.05
10574	CCT7		0	0	0	S	3	3	0.07		0	0	0	S	2	3	0.06		0	0	0	S	5	11	0.41	S	1	1	0.06	S	6	7	0.09		0	0	0	S	4	7	0.1		0	0	0	S	9	10	0.38
55660	PRPF40A		0	0	0	S	2	2	0.01		0	0	0	S	2	2	0.02		0	0	0	S	3	4	0.12	R	1	2	0	S	1	1	0.03		0	0	0	S	3	3	0.06		0	0	0	S	4	5	0.04
2584	GALK1		0	0	0	A	1	1	0		0	0	0	R	1	2	0.04		0	0	0	A	1	1	0.03	R	1	3	0.18	A	1	1	0		0	0	0	S	1	1	0.04		0	0	0	R	1	3	0.07
80306	MED28		0	0	0	A	1	2	0		0	0	0	S	1	1	0.17		0	0	0	R	1	3	0	A	1	1	0	R	2	4	0.31		0	0	0		0	0	0	S	1	2	0.14	R	1	3	0
9125	RQCD1		0	0	0	S	1	1	0		0	0	0	R	1	1	0.08		0	0	0	S	2	2	0.11	R	1	1	0.04	S	1	2	0.05		0	0	0		0	0	0		0	0	0		0	0	0
1175	AP2S1		0	0	0	S	1	1	0.17		0	0	0	R	1	1	0.21		0	0	0	S	1	1	0.3	S	1	2	0.82		0	0	0	S	1	2	0.71	S	1	1	0		0	0	0		0	0	0
1434	CSE1L		0	0	0	R	1	1	1.7		0	0	0	R	2	2	3.3		0	0	0	S	3	4	0.03	S	2	2	14.7		0	0	0	S	1	1	14.8		0	0	0	S	1	2	14.4	S	5	11	0.31
64769	MEAF6		0	0	0	S	1	2	0.06		0	0	0	S	1	4	0		0	0	0	S	1	4	0	S	1	1	1		0	0	0		0	0	0	S	1	1	0.07		0	0	0	S	1	3	0.07
9897	KIAA0196		0	0	0	R	1	1	0.002		0	0	0	S	1	2	0		0	0	0	S	5	6	0.02	S	1	1	0		0	0	0		0	0	0	S	2	2	0.007		0	0	0	S	3	3	0.03
84959	UBASH3B		0	0	0	R	1	1	0.04		0	0	0	S	1	1	0.05		0	0	0	R	1	1	0.06	A	1	1	1.6		0	0	0		0	0	0		0	0	0		0	0	0		0	0	0
22828	SCAF8		0	0	0	S	5	7	0.04		0	0	0	S	4	5	0.009		0	0	0	S	5	6	0.08	S	1	1	0.01	S	5	7	0.05		0	0	0	S	3	3	0.02		0	0	0	S	8	12	0.38
22820	COPG1		0	0	0	S	2	2	0.04		0	0	0	S	3	3	0.06		0	0	0	S	5	7	0.15	S	1	2	0.008	S	4	5	0.04		0	0	0	S	2	4	0		0	0	0	S	8	14	0.27
3609	ILF3		0	0	0	R	1	1	0		0	0	0	S	1	1	0		0	0	0	S	1	2	0		0	0	0	S	1	1	0	S	1	1	0.04	S	2	2	0	S	1	1	0	S	1	2	0
54881	TEX10		0	0	0	S	2	4	0.01		0	0	0	S	2	3	0.02		0	0	0	S	2	5	0.005		0	0	0	S	3	3	0.04	S	1	2	0.03	S	1	1	0.01		0	0	0	S	3	5	0.03
55809	TRERF1		0	0	0	S	1	1	0		0	0	0	R	1	2	0		0	0	0	S	1	3	0.004		0	0	0	R	1	1	0.01	S	1	1	0	S	2	3	0.02		0	0	0	R	2	2	0
4520	MTF1		0	0	0	A	1	1	0.01		0	0	0	R	2	2	0.06		0	0	0	A	2	3	0.07		0	0	0	A	2	2	0.03	S	1	1	0.1	S	1	1	0.03		0	0	0	R	2	2	0.1
10525	HYOU1		0	0	0	S	1	1	0.06		0	0	0	S	1	1	0.1		0	0	0	R	1	1	0.09		0	0	0	S	1	1	0.05	S	1	1	0.03	S	1	1	0.07		0	0	0		0	0	0
221037	JMJD1C		0	0	0	S	1	1	0		0	0	0	S	1	1	0		0	0	0	R	1	1	0.002		0	0	0	S	1	1	0.001	S	1	1	0		0	0	0		0	0	0	S	1	1	0.003
1828	DSG1		0	0	0	S	6	12	0.06		0	0	0	S	3	4	0.02		0	0	0	S	5	7	0.04		0	0	0	S	2	2	0.07		0	0	0	S	3	4	0.04	S	2	4	0.04	S	2	3	0.005
26148	C10orf12		0	0	0	S	2	3	0.02		0	0	0	S	1	2	0.009		0	0	0	S	3	3	0.04		0	0	0	R	1	1	0.01		0	0	0	S	2	2	0.01	S	1	1	0	S	2	3	0.03
5905	RANGAP1		0	0	0	S	6	8	0.21		0	0	0	S	7	11	0.36		0	0	0	S	9	13	0.76		0	0	0	S	7	9	0.35		0	0	0	S	7	11	0.17		0	0	0	S	9	14	0.53
4292	MLH1		0	0	0	S	6	9	0.08		0	0	0	S	2	2	0.05		0	0	0	S	6	6	0.27		0	0	0	S	5	7	0.09		0	0	0	S	5	6	0.01		0	0	0	S	11	13	0.38
9793	CKAP5		0	0	0	S	4	5	0.01		0	0	0	S	5	6	0.002		0	0	0	S	11	13	0.07		0	0	0	S	8	13	0		0	0	0	S	6	12	0.02		0	0	0	S	26	34	0.37
25836	NIPBL		0	0	0	S	4	6	0.01		0	0	0	S	3	6	0.005		0	0	0	S	4	5	0.01		0	0	0	S	1	2	0		0	0	0	S	2	5	0		0	0	0	S	10	13	0.06
23223	RRP12		0	0	0	S	4	4	0.01		0	0	0	S	3	3	0.01		0	0	0	S	3	5	0.007		0	0	0	S	1	2	0		0	0	0	S	3	4	0.03		0	0	0	S	9	15	0.15
10801	SEPT9		0	0	0	S	4	9	0.03		0	0	0	S	1	2	0.01		0	0	0	S	1	2	0.06		0	0	0	S	5	6	0.32		0	0	0	S	1	4	0.03		0	0	0	S	3	5	0.28
372	ARCN1		0	0	0	S	3	4	0.1		0	0	0	S	2	3	0.08		0	0	0	S	3	3	0.07		0	0	0	S	3	4	0.07		0	0	0	S	3	6	0.09		0	0	0	S	6	10	0.38
288	ANK3		0	0	0	S	2	2	0.004		0	0	0	S	3	4	0.01		0	0	0	S	8	10	0.02		0	0	0	S	4	7	0.006		0	0	0	S	4	6	0		0	0	0	S	11	15	0.08
22827	PUF60		0	0	0	S	2	2	0.01		0	0	0	S	3	4	0.07		0	0	0	S	6	15	0.49		0	0	0	S	4	10	0.2		0	0	0	S	3	7	0.08		0	0	0	S	2	9	0
3608	ILF2		0	0	0	S	2	3	0.2		0	0	0	S	3	3	0.44		0	0	0	S	5	7	0.7		0	0	0	S	5	7	0.49		0	0	0	S	5	5	0.23		0	0	0	S	4	4	0.33
25920	NELFB		0	0	0	S	2	3	0.01		0	0	0	S	3	5	0.01		0	0	0	S	2	3	0.07		0	0	0	S	1	1	0.02		0	0	0	S	1	3	0.03		0	0	0	S	2	4	0.02
58517	RBM25		0	0	0	S	1	1	0.003		0	0	0	S	2	3	0		0	0	0	S	4	7	0.09		0	0	0	S	1	1	0.005		0	0	0	S	2	4	0.03		0	0	0	S	3	3	0.009
51663	ZFR		0	0	0	S	1	2	0.01		0	0	0	S	2	3	0.03		0	0	0	S	3	5	0.05		0	0	0	S	1	2	0.006		0	0	0	S	2	2	0.02		0	0	0	S	6	7	0.11
4848	CNOT2		0	0	0	S	1	1	0.1		0	0	0	S	1	2	0.03		0	0	0	S	2	2	0.4		0	0	0	S	2	2	0.09		0	0	0	S	2	3	0.03		0	0	0	S	4	8	0.3
5605	MAP2K2		0	0	0	S	1	2	0		0	0	0	S	1	1	0.06		0	0	0	S	2	2	0.11		0	0	0	S	1	1	0.04		0	0	0	S	1	1	0.04		0	0	0	S	2	2	0.07
9849	ZNF518A		0	0	0	S	1	2	0		0	0	0	S	1	2	0		0	0	0	S	1	1	0		0	0	0	S	1	1	0		0	0	0	S	2	5	0.005		0	0	0	S	2	2	0.004
29883	CNOT7		0	0	0	S	3	4	0.05		0	0	0	S	1	1	0		0	0	0	S	3	5	0.34		0	0	0	S	3	5	0.12		0	0	0	S	1	1	0.03		0	0	0	S	3	3	0.43
23513	SCRIB		0	0	0	S	7	8	0.02		0	0	0	S	4	4	0.006		0	0	0	S	9	10	0.05		0	0	0	S	11	17	0.04		0	0	0	S	1	1	0.004		0	0	0	S	23	30	0.52
6280	S100A9		0	0	0	S	3	4	0.45		0	0	0	S	2	4	0.54		0	0	0	S	4	5	0.76		0	0	0	S	2	5	0.27		0	0	0	S	2	6	0.73		0	0	0	S	1	2	0.12
22913	RALY		0	0	0	S	3	4	0.24		0	0	0	S	3	3	0.2		0	0	0	S	2	3	0.27		0	0	0	S	5	6	0.32		0	0	0	S	2	3	0.29		0	0	0	R	1	1	0
9026	HIP1R		0	0	0	S	1	3	0		0	0	0	S	1	3	0.008		0	0	0	S	1	1	0		0	0	0	R	1	1	0		0	0	0	S	1	2	0.003		0	0	0	S	6	8	0.06
9555	H2AFY		0	0	0	S	2	4	0.15		0	0	0	S	2	2	0.29		0	0	0	A	1	1	0.12		0	0	0	S	3	4	0.46		0	0	0	S	2	3	0.26		0	0	0	S	2	4	0.18
2580	GAK		0	0	0	S	3	3	0		0	0	0	S	2	3	0.02		0	0	0	S	6	8	0.05		0	0	0	S	3	6	0.02		0	0	0	S	2	3	0.007		0	0	0	S	5	7	0.06
8301	PICALM		0	0	0	S	2	5	0.009		0	0	0	S	2	5	0.01		0	0	0	S	1	2	0.02		0	0	0	S	4	5	0.09		0	0	0	S	1	1	0.01		0	0	0	S	3	5	0.03
85456	TNKS1BP1		0	0	0	S	11	12	0.05		0	0	0	S	3	3	0.02		0	0	0	S	9	13	0.07		0	0	0	S	15	16	0.03		0	0	0	S	2	3	0		0	0	0	S	22	35	0.3
26121	PRPF31		0	0	0	S	3	4	0		0	0	0	R	1	1	0		0	0	0	S	2	3	0.13		0	0	0	S	3	5	0.1		0	0	0	S	3	4	0.06		0	0	0	S	5	10	0.22
81556	VWA9		0	0	0	S	3	5	0.11		0	0	0	R	1	1	0.05		0	0	0	S	2	2	0.04		0	0	0	S	2	3	0.15		0	0	0	S	2	4	0.11		0	0	0	S	2	2	0.06
9111	NMI		0	0	0	S	1	1	0		0	0	0	S	3	4	0.16		0	0	0	S	3	4	0.18		0	0	0	S	2	3	0.14		0	0	0	S	2	3	0.06		0	0	0	S	1	2	0
26227	PHGDH		0	0	0	S	1	1	0		0	0	0	S	2	3	0.05		0	0	0	S	5	7	0.15		0	0	0	S	2	3	0.05		0	0	0	S	1	5	0		0	0	0	S	4	5	0.11
388697	HRNR		0	0	0	S	3	5	0.01		0	0	0	S	3	5	0.02		0	0	0	S	3	4	0.03		0	0	0	S	1	1	0		0	0	0	S	2	5	0.02		0	0	0	S	4	8	0.04
51333	ZNF771		0	0	0	S	2	2	0.12		0	0	0	S	2	2	0.18		0	0	0	S	2	3	0.18		0	0	0	S	2	2	0.15		0	0	0	S	2	2	0.13		0	0	0	S	1	1	0.05
6578	SLCO2A1		0	0	0	S	1	1	0		0	0	0	S	1	1	0		0	0	0	R	1	1	0		0	0	0	R	1	1	0		0	0	0	S	1	1	0		0	0	0	S	1	1	0
81608	FIP1L1		0	0	0	R	1	1	0.07		0	0	0	S	2	3	0.22		0	0	0	S	3	4	0.12		0	0	0	S	2	2	0.11		0	0	0	S	1	1	0		0	0	0	S	2	3	0.18
8943	AP3D1		0	0	0	R	1	2	0.02		0	0	0	S	1	1	0		0	0	0	S	1	1	0.03		0	0	0	S	3	4	0.04		0	0	0	S	3	3	0.03		0	0	0	S	3	4	0.03
64426	SUDS3		0	0	0	R	1	1	0.09		0	0	0	S	2	2	0.31		0	0	0	S	1	2	0.12		0	0	0	S	1	1	0.14		0	0	0	S	2	3	0.14		0	0	0	S	2	2	0.2
9319	TRIP13		0	0	0	R	1	2	0.05		0	0	0	R	2	2	0.08		0	0	0	S	3	4	0.19		0	0	0	S	2	2	0.06		0	0	0	S	2	3	0		0	0	0	S	3	5	0.3
5411	PNN		0	0	0	R	1	1	0.03		0	0	0	R	1	1	0.06		0	0	0	S	2	2	0.02		0	0	0	A	1	1	0.04		0	0	0	S	1	2	0.03		0	0	0	R	1	1	0.08
57662	CAMSAP3		0	0	0	A	1	1	0		0	0	0	S	2	4	0.004		0	0	0	S	3	5	0.03		0	0	0	S	2	3	0.003		0	0	0	S	1	2	0		0	0	0	S	4	5	0.04
9879	DDX46		0	0	0	A	1	1	0		0	0	0	S	1	1	0		0	0	0	S	2	2	0.01		0	0	0	S	4	4	0		0	0	0	S	2	2	0		0	0	0	S	4	5	0.03
22823	MTF2		0	0	0	S	2	2	0.04		0	0	0	S	2	2	0.45		0	0	0	S	1	1	0		0	0	0	S	2	2	0.08		0	0	0	S	2	2	0.05		0	0	0		0	0	0
5304	PIP		0	0	0	S	1	1	0.05		0	0	0	S	1	1	0.04		0	0	0	S	1	1	0.05		0	0	0	S	1	3	0.04		0	0	0	S	1	1	0.06		0	0	0		0	0	0
138046	RALYL		0	0	0	S	1	1	0.14		0	0	0	S	1	1	0.23		0	0	0	S	1	2	0.22		0	0	0	S	1	2	0.18		0	0	0	S	1	2	0.19		0	0	0		0	0	0
3910	LAMA4		0	0	0	S	1	3	0.004		0	0	0	R	1	1	0.004		0	0	0	A	1	1	0		0	0	0	A	1	1	0.002		0	0	0	S	1	1	0		0	0	0		0	0	0
148254	ZNF555		0	0	0	R	1	4	0.07		0	0	0	A	1	1	0.21		0	0	0	R	1	3	0.28		0	0	0	R	1	2	0		0	0	0	S	1	1	0.04		0	0	0		0	0	0
9698	PUM1		0	0	0	S	4	4	0		0	0	0	A	1	1	0		0	0	0	S	2	2	0.01		0	0	0	S	3	4	0.02		0	0	0	S	1	1	0.01		0	0	0	S	8	16	0.36
7514	XPO1		0	0	0	S	11	16	0.11		0	0	0	S	4	5	0.12		0	0	0	S	7	10	0.13		0	0	0	S	4	5	0.04		0	0	0		0	0	0		0	0	0	S	17	31	1
5831	PYCR1		0	0	0	S	1	1	0		0	0	0	S	1	1	0.1		0	0	0	S	1	1	0.12		0	0	0	S	1	1	0.1		0	0	0		0	0	0		0	0	0	S	1	2	0.1
25803	SPDEF		0	0	0	S	1	1	0.09		0	0	0	S	1	1	0.13		0	0	0	R	1	1	0.17		0	0	0	S	1	1	0.2		0	0	0		0	0	0		0	0	0	S	1	1	0.18
55227	LRRC1		0	0	0	S	4	7	0.1		0	0	0	S	1	1	0		0	0	0	S	3	5	0.07		0	0	0	S	4	4	0.16		0	0	0		0	0	0		0	0	0	S	5	10	0.32
10916	MAGED2		0	0	0	S	1	2	0		0	0	0	S	1	1	0		0	0	0	S	2	3	0.09		0	0	0	S	3	5	0.04		0	0	0		0	0	0		0	0	0	S	4	4	0.08
2959	GTF2B		0	0	0	S	1	2	0		0	0	0	S	1	1	0.09		0	0	0	S	3	3	0.37		0	0	0	S	3	4	0.07		0	0	0		0	0	0		0	0	0	S	1	2	0.04
55602	CDKN2AIP		0	0	0	S	1	1	0		0	0	0	R	1	1	0.11		0	0	0	S	3	4	0.02		0	0	0	S	3	3	0.04		0	0	0		0	0	0		0	0	0	S	5	6	0.06
23067	SETD1B		0	0	0	R	1	2	0		0	0	0	R	1	1	0		0	0	0	S	2	2	13		0	0	0	R	1	1	0.01		0	0	0		0	0	0		0	0	0	S	6	8	0.07
80335	WDR82		0	0	0	A	1	1	0		0	0	0	R	1	2	0.09		0	0	0	S	1	2	0.12		0	0	0	S	4	4	0.28		0	0	0		0	0	0		0	0	0	S	2	4	0.12
51406	NOL7		0	0	0	A	1	1	0.17		0	0	0	R	1	2	0		0	0	0	S	1	5	0.42		0	0	0	S	1	4	0.13		0	0	0		0	0	0		0	0	0	S	1	3	0
124220	ZG16B		0	0	0	S	1	1	0		0	0	0	S	1	1	0		0	0	0	S	1	3	0.13		0	0	0	S	1	2	0		0	0	0		0	0	0		0	0	0		0	0	0
203859	ANO5		0	0	0	R	1	1	0.002		0	0	0	S	1	1	0.007		0	0	0	R	1	2	0.009		0	0	0	S	1	2	0		0	0	0		0	0	0		0	0	0		0	0	0
128346	C1orf162		0	0	0	A	1	1	0.12		0	0	0	A	1	1	0.14		0	0	0	R	1	1	0.41		0	0	0		0	0	0		0	0	0	S	1	1	0.33	S	1	2	0.24		0	0	0
641700	ECSCR		0	0	0	A	1	2	1.1		0	0	0	A	1	1	0.05		0	0	0	A	1	1	23.8		0	0	0		0	0	0		0	0	0	S	1	1	22	S	1	1	35.6		0	0	0
58155	PTBP2		0	0	0	S	1	1	0.1		0	0	0	S	1	2	0.28		0	0	0	S	1	1	0.43		0	0	0		0	0	0		0	0	0	S	1	1	0.32		0	0	0	S	1	2	0.52
23307	FKBP15		0	0	0	S	4	6	0.006		0	0	0	S	5	9	0.05		0	0	0	S	9	12	0.13		0	0	0		0	0	0		0	0	0	S	3	3	0.05		0	0	0	S	10	13	0.2
23062	GGA2		0	0	0	S	1	1	0.03		0	0	0	S	1	1	0		0	0	0	S	1	2	0		0	0	0		0	0	0		0	0	0	S	1	1	0.02		0	0	0	S	2	3	0.04
54606	DDX56		0	0	0	S	1	2	0.02		0	0	0	A	2	2	0		0	0	0	S	2	2	0.04		0	0	0		0	0	0		0	0	0	S	1	1	0.03		0	0	0	S	3	3	0.04
51203	NUSAP1		0	0	0	S	2	4	0.06		0	0	0	S	2	2	0.16		0	0	0	S	2	2	0.08		0	0	0		0	0	0		0	0	0	S	2	2	0.05		0	0	0		0	0	0
6626	SNRPA		0	0	0	S	1	1	0		0	0	0	S	1	1	0		0	0	0	S	1	2	0.03		0	0	0		0	0	0		0	0	0	S	1	1	0		0	0	0		0	0	0
25981	DNAH1		0	0	0	A	1	1	0		0	0	0	R	1	1	0.11		0	0	0	R	1	1	0.35		0	0	0		0	0	0		0	0	0	S	1	1	0		0	0	0		0	0	0
7850	IL1R2		0	0	0	A	1	1	0		0	0	0	A	1	1	0.03		0	0	0	A	1	1	0.03		0	0	0		0	0	0		0	0	0	S	1	1	0.04		0	0	0		0	0	0
642	BLMH		0	0	0	S	1	2	0		0	0	0	S	1	1	0		0	0	0	R	1	2	0.008		0	0	0		0	0	0		0	0	0		0	0	0		0	0	0		0	0	0
55700	MAP7D1		0	0	0	A	1	1	0		0	0	0	A	1	1	0		0	0	0		0	0	0	S	1	2	0.02	R	1	1	0.02	S	1	1	0		0	0	0		0	0	0		0	0	0
27043	PELP1		0	0	0	S	2	2	0.02		0	0	0	S	3	3	0.02		0	0	0		0	0	0	S	1	2	0.02	S	2	3	0.01		0	0	0	S	2	3	0.02		0	0	0	S	5	5	0.11
448834	KPRP		0	0	0	S	1	5	0.02		0	0	0	S	1	1	0.004		0	0	0		0	0	0		0	0	0	R	2	2	0.02		0	0	0	S	1	2	0.007		0	0	0	S	1	1	0.02
11338	U2AF2		0	0	0	A	1	1	0.05		0	0	0	S	1	1	0		0	0	0		0	0	0		0	0	0	S	1	1	0		0	0	0	S	1	1	0.03		0	0	0	S	1	1	0.05
3191	HNRNPL		0	0	0	S	3	4	0.009		0	0	0	R	1	1	0		0	0	0		0	0	0		0	0	0	S	2	3	0.02		0	0	0		0	0	0		0	0	0	A	1	1	0
23780	APOL2		0	0	0	S	1	1	0		0	0	0	S	1	1	0		0	0	0		0	0	0		0	0	0	S	1	2	0		0	0	0		0	0	0		0	0	0	S	1	3	0.02
11340	EXOSC8		0	0	0	R	1	1	0.83		0	0	0	R	1	1	1.1		0	0	0		0	0	0		0	0	0	S	1	2	0.71		0	0	0		0	0	0		0	0	0	R	1	1	1.3
9531	BAG3		0	0	0	S	1	1	0		0	0	0	S	1	1	0.03		0	0	0		0	0	0		0	0	0	S	2	2	0.04		0	0	0		0	0	0		0	0	0		0	0	0
91624	NEXN		0	0	0	S	1	1	0.05		0	0	0	A	1	2	0.39		0	0	0		0	0	0		0	0	0	A	1	1	0.03		0	0	0		0	0	0		0	0	0		0	0	0
64087	MCCC2		0	0	0	S	1	1	0		0	0	0	A	1	1	0		0	0	0		0	0	0		0	0	0	S	3	3	0		0	0	0		0	0	0		0	0	0		0	0	0
144535	CFAP54		0	0	0	S	1	2	0.008		0	0	0	R	1	2	0.03		0	0	0		0	0	0		0	0	0		0	0	0	S	1	1	0		0	0	0		0	0	0		0	0	0
171392	ZNF675		0	0	0	R	1	1	0.05		0	0	0	A	1	1	0.65		0	0	0		0	0	0		0	0	0		0	0	0	S	1	1	0.12		0	0	0		0	0	0		0	0	0
139716	GAB3		0	0	0	A	1	1	0.01		0	0	0	R	1	2	0.05		0	0	0		0	0	0		0	0	0		0	0	0		0	0	0	S	1	1	0.04	S	1	1	0.19	R	2	3	0.06
7260	TSSC1		0	0	0	S	1	1	0.02		0	0	0	S	1	1	0.04		0	0	0		0	0	0		0	0	0		0	0	0		0	0	0	S	1	1	0.04		0	0	0	R	1	1	0.05
2706	GJB2		0	0	0	A	1	1	0.94		0	0	0	R	1	2	0.15		0	0	0		0	0	0		0	0	0		0	0	0		0	0	0	S	1	1	0		0	0	0	A	1	1	0.05
55616	ASAP3		0	0	0	A	1	1	0.03		0	0	0	A	1	1	0.04		0	0	0		0	0	0		0	0	0		0	0	0		0	0	0	S	1	1	0.02		0	0	0		0	0	0
64766	S100PBP		0	0	0	R	1	1	0.13		0	0	0	A	1	1	0.03		0	0	0		0	0	0		0	0	0		0	0	0		0	0	0		0	0	0	S	1	1	0		0	0	0
2961	GTF2E2		0	0	0	S	1	1	0		0	0	0	S	1	1	0		0	0	0		0	0	0		0	0	0		0	0	0		0	0	0		0	0	0		0	0	0	S	1	1	0
84226	C2orf16		0	0	0	S	1	1	0.007		0	0	0	A	1	1	0.11		0	0	0		0	0	0		0	0	0		0	0	0		0	0	0		0	0	0		0	0	0		0	0	0
5440	POLR2K		0	0	0	R	1	1	0		0	0	0	S	1	1	0		0	0	0		0	0	0		0	0	0		0	0	0		0	0	0		0	0	0		0	0	0		0	0	0
80004	ESRP2		0	0	0	S	1	1	0		0	0	0	S	1	1	0.03		0	0	0	S	2	2	0		0	0	0	S	2	2	0.05		0	0	0	S	2	2	0		0	0	0	S	6	8	0.21
23215	PRRC2C		0	0	0	S	2	2	0.009		0	0	0	A	1	1	0		0	0	0	S	2	2	0.01		0	0	0	S	5	5	0.02		0	0	0	S	3	4	0.02		0	0	0	S	4	4	0.05
55010	PARPBP		0	0	0	R	1	2	0.02		0	0	0		0	0	0	A	1	1	0.49	S	2	2	0.37	R	1	1	0.05	S	1	1	0.22	S	1	3	0.1	S	2	2	0.45	S	1	1	0.05	R	1	2	0.39
23279	NUP160		0	0	0	S	1	2	0.0008		0	0	0		0	0	0	R	1	1	0.27	S	1	1	0		0	0	0	S	1	1	0	S	1	1	0.003		0	0	0		0	0	0	S	1	1	0.01
5514	PPP1R10		0	0	0	S	2	4	0.01		0	0	0		0	0	0	A	1	1	0.03	S	3	3	0.09		0	0	0	S	4	6	0.06		0	0	0	S	3	3	0.1		0	0	0	S	3	3	0.11
143	PARP4		0	0	0	A	1	1	0		0	0	0		0	0	0	S	1	1	0.57	S	1	1	0		0	0	0		0	0	0		0	0	0		0	0	0		0	0	0	S	1	2	0.003
8570	KHSRP		0	0	0	S	1	2	0		0	0	0		0	0	0	R	1	2	0	A	1	1	0	S	1	1	0.02		0	0	0		0	0	0	S	1	1	0.03		0	0	0	S	3	5	0.01
23256	SCFD1		0	0	0	A	1	1	0		0	0	0		0	0	0	S	1	1	0.14		0	0	0		0	0	0		0	0	0		0	0	0	S	1	1	0		0	0	0		0	0	0
9181	ARHGEF2		0	0	0	S	3	3	0		0	0	0		0	0	0		0	0	0	S	2	2	0	A	1	1	0.24	S	3	4	0.006		0	0	0	S	1	1	0		0	0	0	S	3	5	0.02
51780	KDM3B		0	0	0	R	2	4	0		0	0	0		0	0	0		0	0	0	S	3	3	0.03	S	2	2	0.02	R	2	2	0		0	0	0	S	2	2	0.01		0	0	0	S	10	15	0.06
23329	TBC1D30		0	0	0	R	2	2	0		0	0	0		0	0	0		0	0	0	A	1	1	0	S	1	1	0.05	S	2	2	0		0	0	0		0	0	0		0	0	0	R	2	3	0.04
9857	CEP350		0	0	0	R	1	1	0.22		0	0	0		0	0	0		0	0	0	S	1	1	0.005	R	1	1	0.69		0	0	0	S	1	1	0.59		0	0	0		0	0	0		0	0	0
5933	RBL1		0	0	0	S	1	1	0		0	0	0		0	0	0		0	0	0	S	1	1	0.005	S	1	2	0.006		0	0	0		0	0	0	S	1	2	0		0	0	0	S	1	1	0
376267	RAB15		0	0	0	S	2	3	0.25		0	0	0		0	0	0		0	0	0	S	1	3	0.12	S	1	2	0.1	S	2	2	0.87	S	1	1	0		0	0	0	S	1	2	0.38	S	2	5	0.47
83452	RAB33B		0	0	0	S	1	2	0.21		0	0	0		0	0	0		0	0	0	S	1	3	0.1		0	0	0	S	1	1	0.55	S	1	1	0		0	0	0	S	1	2	0.33	S	1	4	0.28
7917	BAG6		0	0	0	S	6	8	0.03		0	0	0		0	0	0		0	0	0	S	6	8	0.09		0	0	0	S	3	4	0		0	0	0	S	2	4	0.03		0	0	0	S	8	9	0.18
10514	MYBBP1A		0	0	0	S	2	3	0		0	0	0		0	0	0		0	0	0	S	4	6	0.005		0	0	0	A	1	1	0		0	0	0	S	2	2	0		0	0	0	S	9	12	0.08
5297	PI4KA		0	0	0	S	2	2	0.002		0	0	0		0	0	0		0	0	0	S	1	1	0.008		0	0	0	S	4	4	0.007		0	0	0	S	2	2	0.001		0	0	0	S	17	24	0.29
6731	SRP72		0	0	0	S	1	1	0.02		0	0	0		0	0	0		0	0	0	S	3	3	0.07		0	0	0	S	2	2	0.03		0	0	0	S	2	3	0.07		0	0	0	S	1	1	0.02
4602	MYB		0	0	0	S	1	1	0.02		0	0	0		0	0	0		0	0	0	S	1	1	0.03		0	0	0	S	1	2	0.02		0	0	0	S	1	1	0.02		0	0	0	S	1	1	0.02
22818	COPZ1		0	0	0	S	1	1	0		0	0	0		0	0	0		0	0	0	R	1	1	0		0	0	0	S	1	1	0.07		0	0	0	S	2	3	0.05		0	0	0	S	2	3	0.13
1823	DSC1		0	0	0	R	1	1	0		0	0	0		0	0	0		0	0	0	R	1	1	0.02		0	0	0	A	1	1	0		0	0	0	S	1	1	0.02		0	0	0	R	1	1	0
8021	NUP214		0	0	0	R	2	3	0.009		0	0	0		0	0	0		0	0	0	R	2	4	0.02		0	0	0	R	2	3	0.008		0	0	0	S	1	1	0		0	0	0	S	10	12	0.13
6773	STAT2		0	0	0	A	1	1	0		0	0	0		0	0	0		0	0	0	S	1	1	0.02		0	0	0	S	1	2	0		0	0	0	S	1	1	0		0	0	0	S	2	2	0
285643	KIF4B		0	0	0	A	1	1	0.01		0	0	0		0	0	0		0	0	0	A	1	1	0.006		0	0	0	A	1	1	0.007		0	0	0	S	1	1	0.02		0	0	0	A	1	2	0.03
29114	TAGLN3		0	0	0	S	1	1	0.2		0	0	0		0	0	0		0	0	0	A	1	1	0		0	0	0	A	1	1	0.26		0	0	0	S	1	1	0.81		0	0	0		0	0	0
10419	PRMT5		0	0	0	R	1	1	0		0	0	0		0	0	0		0	0	0	S	2	2	0.04		0	0	0	A	1	1	0.02		0	0	0	S	1	1	0.02		0	0	0		0	0	0
8500	PPFIA1		0	0	0	S	1	1	0.07		0	0	0		0	0	0		0	0	0	S	1	1	0		0	0	0	S	1	1	0.05		0	0	0		0	0	0	S	1	2	0	S	4	7	0.03
5317	PKP1		0	0	0	S	3	4	0.04		0	0	0		0	0	0		0	0	0	S	3	3	0.01		0	0	0	A	1	1	0.02		0	0	0		0	0	0	S	3	6	0.18		0	0	0
26058	GIGYF2		0	0	0	S	2	2	0.009		0	0	0		0	0	0		0	0	0	S	1	1	0		0	0	0	S	4	6	0.03		0	0	0		0	0	0		0	0	0	S	7	8	0.09
908	CCT6A		0	0	0	S	1	1	0.02		0	0	0		0	0	0		0	0	0	S	1	1	0		0	0	0	S	1	1	0		0	0	0		0	0	0		0	0	0	S	2	2	0.03
10197	PSME3		0	0	0	S	1	1	0.07		0	0	0		0	0	0		0	0	0	S	3	4	0.14		0	0	0	S	1	2	0		0	0	0		0	0	0		0	0	0	S	3	5	0.32
392	ARHGAP1		0	0	0	S	1	2	0		0	0	0		0	0	0		0	0	0	S	2	4	0.08		0	0	0	S	3	4	0		0	0	0		0	0	0		0	0	0	S	4	5	0.18
11325	DDX42		0	0	0	S	2	2	0.006		0	0	0		0	0	0		0	0	0	R	1	1	0.008		0	0	0	S	2	3	0.01		0	0	0		0	0	0		0	0	0	S	4	6	0.05
22980	TCF25		0	0	0	S	1	1	0		0	0	0		0	0	0		0	0	0	R	1	1	0		0	0	0	S	4	5	0.08		0	0	0		0	0	0		0	0	0	S	2	2	0.09
359948	IRF2BP2		0	0	0	R	1	1	0		0	0	0		0	0	0		0	0	0	S	1	2	0		0	0	0	S	1	1	0.04		0	0	0		0	0	0		0	0	0	A	1	1	0.17
64319	FBRS		0	0	0	R	1	1	0		0	0	0		0	0	0		0	0	0	R	1	1	0.03		0	0	0	R	1	1	0.02		0	0	0		0	0	0		0	0	0	S	1	2	0.08
157680	VPS13B		0	0	0	A	1	1	0.005		0	0	0		0	0	0		0	0	0	R	1	2	0.02		0	0	0	S	1	2	0		0	0	0		0	0	0		0	0	0	S	8	18	0.05
85461	TANC1		0	0	0	A	1	1	0		0	0	0		0	0	0		0	0	0	S	2	4	0.01		0	0	0	S	5	6	0.01		0	0	0		0	0	0		0	0	0	S	5	7	0.04
64794	DDX31		0	0	0	S	1	1	0.04		0	0	0		0	0	0		0	0	0	S	1	1	0		0	0	0	S	2	2	0.05		0	0	0		0	0	0		0	0	0		0	0	0
5436	POLR2G		0	0	0	S	1	1	0.08		0	0	0		0	0	0		0	0	0	S	1	1	0.13		0	0	0	S	1	1	0.12		0	0	0		0	0	0		0	0	0		0	0	0
11218	DDX20		0	0	0	S	1	1	0.003		0	0	0		0	0	0		0	0	0	S	1	1	0.02		0	0	0	R	1	1	0.01		0	0	0		0	0	0		0	0	0		0	0	0
4869	NPM1		0	0	0	R	1	1	0		0	0	0		0	0	0		0	0	0	R	1	1	0		0	0	0	S	2	4	0.02		0	0	0		0	0	0		0	0	0		0	0	0
5116	PCNT		0	0	0	S	2	2	0.02		0	0	0		0	0	0		0	0	0	S	2	2	0.004		0	0	0		0	0	0	S	1	1	0.14		0	0	0		0	0	0	S	8	9	0.007
11216	AKAP10		0	0	0	S	2	2	0.03		0	0	0		0	0	0		0	0	0	R	2	2	0		0	0	0		0	0	0		0	0	0	S	1	1	0		0	0	0	S	1	1	0.04
51588	PIAS4		0	0	0	S	1	1	0.08		0	0	0		0	0	0		0	0	0	S	2	3	0.01		0	0	0		0	0	0		0	0	0	S	1	1	0		0	0	0	S	1	2	0.04
63897	HEATR6		0	0	0	S	1	2	0.006		0	0	0		0	0	0		0	0	0	S	4	6	0.03		0	0	0		0	0	0		0	0	0	S	2	2	0.009		0	0	0	S	9	11	0.11
3069	HDLBP		0	0	0	R	1	1	0		0	0	0		0	0	0		0	0	0	S	5	9	0.05		0	0	0		0	0	0		0	0	0	S	3	4	0.006		0	0	0	S	4	5	0.03
51593	SRRT		0	0	0	R	1	1	0		0	0	0		0	0	0		0	0	0	S	1	3	0		0	0	0		0	0	0		0	0	0	S	1	1	0.007		0	0	0	S	1	1	0.01
1314	COPA		0	0	0	A	1	1	0.005		0	0	0		0	0	0		0	0	0	S	5	6	0.03		0	0	0		0	0	0		0	0	0	S	1	2	0.02		0	0	0	S	6	6	0.11
165904	XIRP1		0	0	0	A	1	1	0		0	0	0		0	0	0		0	0	0	A	1	2	0.15		0	0	0		0	0	0		0	0	0	S	1	2	0.03		0	0	0		0	0	0
55604	LRRC16A		0	0	0	R	1	1	0		0	0	0		0	0	0		0	0	0	S	3	4	0.03		0	0	0		0	0	0		0	0	0		0	0	0	S	1	1	0	S	2	2	0.008
1198	CLK3		0	0	0	A	1	1	0		0	0	0		0	0	0		0	0	0	A	1	1	0.03		0	0	0		0	0	0		0	0	0		0	0	0	S	1	1	0.29	R	1	1	0.04
9223	MAGI1		0	0	0	A	1	1	0.03		0	0	0		0	0	0		0	0	0	A	1	1	0.04		0	0	0		0	0	0		0	0	0		0	0	0	S	1	1	0.04	A	1	1	0.01
10652	YKT6		0	0	0	S	2	5	0.14		0	0	0		0	0	0		0	0	0	S	2	2	0		0	0	0		0	0	0		0	0	0		0	0	0		0	0	0	S	8	14	2.3
55667	DENND4C		0	0	0	S	1	1	0		0	0	0		0	0	0		0	0	0	S	1	1	0		0	0	0		0	0	0		0	0	0		0	0	0		0	0	0	S	2	2	0.03
5189	PEX1		0	0	0	S	1	1	0		0	0	0		0	0	0		0	0	0	R	1	1	0		0	0	0		0	0	0		0	0	0		0	0	0		0	0	0	R	2	2	0.04
58490	RPRD1B		0	0	0	S	1	1	0		0	0	0		0	0	0		0	0	0	S	1	2	0		0	0	0		0	0	0		0	0	0		0	0	0		0	0	0	R	1	1	0
2072	ERCC4		0	0	0	S	1	2	0.01		0	0	0		0	0	0		0	0	0	R	1	1	0.01		0	0	0		0	0	0		0	0	0		0	0	0		0	0	0	S	1	1	0
25904	CNOT10		0	0	0	R	2	2	0.007		0	0	0		0	0	0		0	0	0	S	2	3	0.005		0	0	0		0	0	0		0	0	0		0	0	0		0	0	0	S	7	11	0.2
1036	CDO1		0	0	0	R	1	1	0.1		0	0	0		0	0	0		0	0	0	R	1	1	0.28		0	0	0		0	0	0		0	0	0		0	0	0		0	0	0	S	1	1	0.22
56916	SMARCAD1		0	0	0	S	1	1	0		0	0	0		0	0	0		0	0	0	S	1	1	0		0	0	0		0	0	0		0	0	0		0	0	0		0	0	0		0	0	0
26735	OR1L3		0	0	0	S	1	1	0.03		0	0	0		0	0	0		0	0	0	R	1	1	0.04		0	0	0		0	0	0		0	0	0		0	0	0		0	0	0		0	0	0
7270	TTF1		0	0	0	S	2	3	0.02		0	0	0		0	0	0		0	0	0	A	1	1	0		0	0	0		0	0	0		0	0	0		0	0	0		0	0	0		0	0	0
25890	ABI3BP		0	0	0	R	1	1	0.01		0	0	0		0	0	0		0	0	0	S	1	1	0.02		0	0	0		0	0	0		0	0	0		0	0	0		0	0	0		0	0	0
10735	STAG2		0	0	0	A	1	1	0		0	0	0		0	0	0		0	0	0	R	1	1	0.004		0	0	0		0	0	0	S	1	1	0	S	1	1	0	S	1	1	0.009	S	1	2	0.007
11021	RAB35		0	0	0	S	2	3	0.26		0	0	0		0	0	0		0	0	0	A	1	3	0	S	1	2	0.75	S	2	2	0.91	S	1	1	0		0	0	0	S	1	2	0.02	S	2	5	0.48
23332	CLASP1		0	0	0	S	4	4	0		0	0	0		0	0	0		0	0	0	A	1	1	0		0	0	0	S	3	3	0.01		0	0	0	A	1	1	0		0	0	0	S	8	13	0.07
27154	BRPF3		0	0	0	R	2	2	0		0	0	0		0	0	0		0	0	0	A	1	1	0		0	0	0	S	2	2	0		0	0	0		0	0	0	S	1	1	0	A	1	1	0
54474	KRT20		0	0	0	S	4	7	0.46		0	0	0		0	0	0		0	0	0	A	3	3	0		0	0	0	A	3	3	0		0	0	0	A	1	1	0		0	0	0	A	2	2	0
9972	NUP153		0	0	0	R	2	2	0.006		0	0	0		0	0	0		0	0	0		0	0	0	A	1	1	0.007	S	3	3	0		0	0	0		0	0	0		0	0	0	S	9	11	0.07
2618	GART		0	0	0	R	1	1	0.04		0	0	0		0	0	0		0	0	0		0	0	0	A	1	1	0	R	2	2	0.05		0	0	0		0	0	0		0	0	0	S	1	1	0.05
8732	RNGTT		0	0	0	A	1	1	0		0	0	0		0	0	0		0	0	0		0	0	0	S	1	1	0.03	S	2	7	0.06		0	0	0		0	0	0		0	0	0	S	2	2	0.03
8726	EED		0	0	0	S	1	3	0		0	0	0		0	0	0		0	0	0		0	0	0	A	1	1	0	S	2	3	0.1		0	0	0		0	0	0		0	0	0		0	0	0
7627	ZNF75A		0	0	0	A	1	1	0.69		0	0	0		0	0	0		0	0	0		0	0	0	S	1	2	0	S	1	2	0		0	0	0		0	0	0		0	0	0		0	0	0
11127	KIF3A		0	0	0	A	1	1	0		0	0	0		0	0	0		0	0	0		0	0	0	R	1	1	0		0	0	0	S	1	1	0		0	0	0		0	0	0		0	0	0
23060	ZNF609		0	0	0	A	1	1	0.03		0	0	0		0	0	0		0	0	0		0	0	0	S	1	1	0.01		0	0	0		0	0	0		0	0	0		0	0	0		0	0	0
55345	ZGRF1		0	0	0	S	2	2	0.02		0	0	0		0	0	0		0	0	0		0	0	0	A	1	1	0		0	0	0		0	0	0		0	0	0		0	0	0		0	0	0
79034	C7orf26		0	0	0	S	1	2	0		0	0	0		0	0	0		0	0	0		0	0	0		0	0	0	S	2	3	0.11		0	0	0	S	1	1	0.08		0	0	0	S	1	2	0
1460	CSNK2B		0	0	0	S	1	1	0		0	0	0		0	0	0		0	0	0		0	0	0		0	0	0	S	2	2	0.2		0	0	0	S	1	2	0.14		0	0	0	S	1	1	0
4939	OAS2		0	0	0	S	2	2	0.05		0	0	0		0	0	0		0	0	0		0	0	0		0	0	0	S	2	2	0.19		0	0	0	S	1	1	0.07		0	0	0	S	2	4	0.13
113828	FAM83F		0	0	0	R	1	1	0		0	0	0		0	0	0		0	0	0		0	0	0		0	0	0	S	1	2	0.06		0	0	0	S	1	1	0		0	0	0	S	2	4	0.09
23199	GSE1		0	0	0	A	1	1	0		0	0	0		0	0	0		0	0	0		0	0	0		0	0	0	S	1	1	0		0	0	0	S	1	1	0		0	0	0	S	5	7	0.02
29958	DMGDH		0	0	0	R	1	1	0.007		0	0	0		0	0	0		0	0	0		0	0	0		0	0	0	S	1	1	0.09		0	0	0	S	1	1	0.1		0	0	0		0	0	0
54832	VPS13C		0	0	0	S	2	3	0		0	0	0		0	0	0		0	0	0		0	0	0		0	0	0	S	5	6	0.002		0	0	0		0	0	0		0	0	0	S	18	21	0.04
148229	ATP8B3		0	0	0	S	1	2	1.6		0	0	0		0	0	0		0	0	0		0	0	0		0	0	0	A	1	1	0		0	0	0		0	0	0		0	0	0	S	1	1	0.92
54556	ING3		0	0	0	S	2	4	0		0	0	0		0	0	0		0	0	0		0	0	0		0	0	0	S	1	1	0.03		0	0	0		0	0	0		0	0	0	S	2	2	0.04
89910	UBE3B		0	0	0	A	1	1	0.003		0	0	0		0	0	0		0	0	0		0	0	0		0	0	0	R	1	1	0.004		0	0	0		0	0	0		0	0	0	S	2	5	0.02
23176	SEPT8		0	0	0	A	1	1	0		0	0	0		0	0	0		0	0	0		0	0	0		0	0	0	S	2	4	0.1		0	0	0		0	0	0		0	0	0		0	0	0
1770	DNAH9		0	0	0	A	1	1	0		0	0	0		0	0	0		0	0	0		0	0	0		0	0	0	S	1	1	0		0	0	0		0	0	0		0	0	0		0	0	0
9909	DENND4B		0	0	0	R	1	1	0		0	0	0		0	0	0		0	0	0		0	0	0		0	0	0		0	0	0	S	1	1	0.02	S	1	1	0		0	0	0		0	0	0
6018	RLF		0	0	0	S	1	1	0		0	0	0		0	0	0		0	0	0		0	0	0		0	0	0		0	0	0	S	1	1	0.03		0	0	0		0	0	0		0	0	0
285282	RABL3		0	0	0	A	1	1	0.23		0	0	0		0	0	0		0	0	0		0	0	0		0	0	0		0	0	0		0	0	0	S	1	2	0.29		0	0	0	A	1	1	0.12
153396	TMEM161B		0	0	0	A	1	1	0.1		0	0	0		0	0	0		0	0	0		0	0	0		0	0	0		0	0	0		0	0	0	S	1	1	0.07		0	0	0	A	1	1	0.12
55898	UNC45A		0	0	0	A	1	5	0.12		0	0	0		0	0	0		0	0	0		0	0	0		0	0	0		0	0	0		0	0	0	S	1	2	0		0	0	0	A	1	3	0.22
43849	KLK12		0	0	0	R	1	1	0.65		0	0	0		0	0	0		0	0	0		0	0	0		0	0	0		0	0	0		0	0	0	S	2	2	1.1		0	0	0		0	0	0
51148	CERCAM		0	0	0	A	1	1	0.26		0	0	0		0	0	0		0	0	0		0	0	0		0	0	0		0	0	0		0	0	0	S	1	1	0.32		0	0	0		0	0	0
57282	SLC4A10		0	0	0	A	1	1	0		0	0	0		0	0	0		0	0	0		0	0	0		0	0	0		0	0	0		0	0	0	S	1	1	0.02		0	0	0		0	0	0
79657	RPAP3		0	0	0	A	1	1	0		0	0	0		0	0	0		0	0	0		0	0	0		0	0	0		0	0	0		0	0	0	S	1	1	0.02		0	0	0		0	0	0
93436	ARMC6		0	0	0	A	1	1	0.87		0	0	0		0	0	0		0	0	0		0	0	0		0	0	0		0	0	0		0	0	0	S	1	1	0.26		0	0	0		0	0	0
149473	CCDC24		0	0	0	A	1	1	0		0	0	0		0	0	0		0	0	0		0	0	0		0	0	0		0	0	0		0	0	0	S	1	1	0.02		0	0	0		0	0	0
3135	HLA-G		0	0	0	A	1	1	0.06		0	0	0		0	0	0		0	0	0		0	0	0		0	0	0		0	0	0		0	0	0	S	1	1	0		0	0	0		0	0	0
222235	FBXL13		0	0	0	S	1	1	0.15		0	0	0		0	0	0		0	0	0		0	0	0		0	0	0		0	0	0		0	0	0		0	0	0	S	1	1	2.9		0	0	0
23091	ZC3H13		0	0	0	R	1	1	0.004		0	0	0		0	0	0		0	0	0		0	0	0		0	0	0		0	0	0		0	0	0		0	0	0	S	1	1	0.03		0	0	0
9620	CELSR1		0	0	0	A	1	1	0.004		0	0	0		0	0	0		0	0	0		0	0	0		0	0	0		0	0	0		0	0	0		0	0	0	S	1	1	0.005		0	0	0
26230	TIAM2		0	0	0	A	1	1	0		0	0	0		0	0	0		0	0	0		0	0	0		0	0	0		0	0	0		0	0	0		0	0	0	S	1	1	0.07		0	0	0
2058	EPRS		0	0	0	A	1	1	0.14		0	0	0		0	0	0		0	0	0		0	0	0		0	0	0		0	0	0		0	0	0		0	0	0	S	2	2	0.47		0	0	0
124446	TMEM219		0	0	0	A	1	1	0.21		0	0	0		0	0	0		0	0	0		0	0	0		0	0	0		0	0	0		0	0	0		0	0	0	S	1	1	0.38		0	0	0
26278	SACS		0	0	0	A	1	1	0.01		0	0	0		0	0	0		0	0	0		0	0	0		0	0	0		0	0	0		0	0	0		0	0	0	S	1	1	0.004		0	0	0
388610	TRNP1		0	0	0	A	1	1	2.7		0	0	0		0	0	0		0	0	0		0	0	0		0	0	0		0	0	0		0	0	0		0	0	0	S	1	2	21.5		0	0	0
79571	GCC1		0	0	0	S	1	1	0		0	0	0		0	0	0		0	0	0		0	0	0		0	0	0		0	0	0		0	0	0		0	0	0		0	0	0	S	3	3	0.004
26993	AKAP8L		0	0	0	S	1	1	0		0	0	0		0	0	0		0	0	0		0	0	0		0	0	0		0	0	0		0	0	0		0	0	0		0	0	0	A	1	1	0.06
22906	TRAK1		0	0	0	S	2	2	0		0	0	0		0	0	0		0	0	0		0	0	0		0	0	0		0	0	0		0	0	0		0	0	0		0	0	0	S	1	2	0.17
57648	KIAA1522		0	0	0	S	1	4	0.01		0	0	0		0	0	0		0	0	0		0	0	0		0	0	0		0	0	0		0	0	0		0	0	0		0	0	0	S	5	10	0.09
2175	FANCA		0	0	0	S	1	1	0		0	0	0		0	0	0		0	0	0		0	0	0		0	0	0		0	0	0		0	0	0		0	0	0		0	0	0	R	1	1	0
5108	PCM1		0	0	0	R	1	1	0		0	0	0		0	0	0		0	0	0		0	0	0		0	0	0		0	0	0		0	0	0		0	0	0		0	0	0	S	2	2	0.09
57122	NUP107		0	0	0	A	1	1	0		0	0	0		0	0	0		0	0	0		0	0	0		0	0	0		0	0	0		0	0	0		0	0	0		0	0	0	S	1	1	0.03
503835	DUXA		0	0	0	A	1	1	0.46		0	0	0		0	0	0		0	0	0		0	0	0		0	0	0		0	0	0		0	0	0		0	0	0		0	0	0	S	1	1	0.71
4064	CD180		0	0	0	S	1	1	0.1		0	0	0		0	0	0		0	0	0		0	0	0		0	0	0		0	0	0		0	0	0		0	0	0		0	0	0		0	0	0
103	ADAR		0	0	0	S	1	1	0		0	0	0		0	0	0		0	0	0		0	0	0		0	0	0		0	0	0		0	0	0		0	0	0		0	0	0		0	0	0
10635	RAD51AP1		0	0	0	S	1	1	0.42		0	0	0		0	0	0		0	0	0		0	0	0		0	0	0		0	0	0		0	0	0		0	0	0		0	0	0		0	0	0
51390	AIG1		0	0	0	S	1	1	0.16		0	0	0		0	0	0		0	0	0		0	0	0		0	0	0		0	0	0		0	0	0		0	0	0		0	0	0		0	0	0
23581	CASP14		0	0	0	S	1	1	0		0	0	0		0	0	0		0	0	0		0	0	0		0	0	0		0	0	0		0	0	0		0	0	0		0	0	0		0	0	0
201633	TIGIT		0	0	0	S	1	1	0.21		0	0	0		0	0	0		0	0	0		0	0	0		0	0	0		0	0	0		0	0	0		0	0	0		0	0	0		0	0	0
6672	SP100		0	0	0	S	1	3	0.03	R	1	1	0.02	S	1	4	0.02	S	1	1	0.02	S	1	2	0.007	S	1	2	0.04	S	1	3	0	S	1	1	0.03	S	1	4	0	S	1	1	0.04	S	1	1	0.02
553158	PRR5-ARHGAP8		0	0	0	S	4	7	0.1	A	2	3	0.08	S	1	1	0		0	0	0	S	5	5	0.19		0	0	0	S	4	6	0.07		0	0	0	S	3	4	0.02		0	0	0	S	11	12	0.6
7474	WNT5A		0	0	0	S	1	1	0.04	S	1	1	0.31		0	0	0		0	0	0		0	0	0	R	1	1	0.16		0	0	0		0	0	0		0	0	0		0	0	0	R	1	1	0
81029	WNT5B		0	0	0	S	1	1	0.04	S	1	1	0.3		0	0	0		0	0	0		0	0	0	R	1	1	0.15		0	0	0		0	0	0		0	0	0		0	0	0	R	1	1	0
23779	ARHGAP8		0	0	0	S	4	7	0.14	A	1	2	0	S	1	1	0		0	0	0	S	5	5	0.26		0	0	0	S	4	6	0.1		0	0	0	S	3	4	0.03		0	0	0	S	11	12	0.83
93349	SP140L		0	0	0	S	1	3	0.02		0	0	0	S	1	4	0.02	S	1	1	0.02	S	1	2	0.006	S	1	2	0.03	S	1	3	0	S	1	1	0.03	S	1	4	0	S	1	1	0.03	S	1	1	0.01
830	CAPZA2		0	0	0	S	1	1	0.03		0	0	0	S	1	2	0		0	0	0	S	2	5	0.18		0	0	0	S	2	2	0		0	0	0	S	1	1	0.03		0	0	0	A	1	2	0
648	BMI1		0	0	0	S	1	1	0.03		0	0	0	S	2	2	0.07		0	0	0	S	1	1	0.06		0	0	0	S	3	4	0.17	S	1	1	0.06	S	2	3	0.04		0	0	0	S	2	3	0.04
100532731	COMMD3-BMI1		0	0	0	S	1	1	0.02		0	0	0	S	2	2	0.03		0	0	0	S	1	1	0.03		0	0	0	S	3	4	0.09	S	1	1	0.03	S	2	3	0.02		0	0	0	S	2	3	0.02
276	AMY1A		0	0	0	S	16	30	0.47		0	0	0	S	18	39	1.2		0	0	0	S	16	35	0.99		0	0	0	S	16	41	1.1		0	0	0	S	13	29	0.83		0	0	0	S	5	10	0.2
277	AMY1B		0	0	0	S	16	30	0.47		0	0	0	S	18	39	1.2		0	0	0	S	16	35	0.99		0	0	0	S	16	41	1.1		0	0	0	S	13	29	0.83		0	0	0	S	5	10	0.2
278	AMY1C		0	0	0	S	16	30	0.47		0	0	0	S	18	39	1.2		0	0	0	S	16	35	0.99		0	0	0	S	16	41	1.1		0	0	0	S	13	29	0.83		0	0	0	S	5	10	0.2
653489	RGPD3		0	0	0	S	4	5	0		0	0	0	S	4	6	0.008		0	0	0	S	3	4	0.04		0	0	0	S	3	4	0.002		0	0	0	S	3	4	0.01		0	0	0	S	11	12	0.19
23042	PDXDC1		0	0	0	S	2	2	0.01		0	0	0	S	3	3	0.04		0	0	0	S	4	5	0.12		0	0	0	S	3	5	0.07		0	0	0	S	3	3	0.03		0	0	0	S	5	8	0.06
7919	DDX39B		0	0	0	S	1	1	0		0	0	0	S	1	1	0		0	0	0	S	3	5	0.08		0	0	0	S	3	4	0.08		0	0	0	S	3	5	0.09		0	0	0	S	4	6	0.17
10212	DDX39A		0	0	0	S	1	1	0		0	0	0	S	1	1	0		0	0	0	S	3	5	0.08		0	0	0	S	3	4	0.08		0	0	0	S	3	5	0.09		0	0	0	S	4	6	0.17
11269	DDX19B		0	0	0	S	1	1	0.01		0	0	0	S	1	1	0.02		0	0	0	S	1	6	0.1		0	0	0	S	2	2	0.01		0	0	0	S	1	2	0		0	0	0	S	3	5	0.08
55308	DDX19A		0	0	0	S	1	1	0.009		0	0	0	S	1	1	0.01		0	0	0	S	1	6	0.08		0	0	0	S	2	2	0.008		0	0	0	S	1	2	0		0	0	0	S	3	5	0.07
54058	C21orf58		0	0	0	S	1	1	0.05		0	0	0	S	1	3	0.24		0	0	0	S	1	1	0.03		0	0	0	S	1	1	0.11		0	0	0	S	1	2	0.22		0	0	0	S	1	2	0.19
344558	SH3RF3		0	0	0	S	1	1	0.01		0	0	0	S	1	3	0.07		0	0	0	S	1	1	0.009		0	0	0	S	1	1	0.03		0	0	0	S	1	2	0.06		0	0	0	S	1	2	0.05
7703	PCGF2		0	0	0	S	1	1	0.03		0	0	0	S	2	2	0.06		0	0	0	S	1	1	0.06		0	0	0	A	2	3	0	S	1	1	0.06	S	2	3	0.03		0	0	0	S	2	3	0.03
285190	RGPD4		0	0	0	S	4	5	0		0	0	0	S	4	6	0.008		0	0	0	A	2	2	0		0	0	0	S	3	4	0.003	S	1	1	0.05	S	3	4	0.09		0	0	0	S	11	12	0.23
829	CAPZA1		0	0	0	S	1	1	0.03		0	0	0	S	1	2	0		0	0	0	A	1	4	0		0	0	0	A	1	1	0		0	0	0	S	1	1	0.03		0	0	0	S	3	5	0.18
4117	MAK		0	0	0	S	1	1	0.0008		0	0	0		0	0	0		0	0	0	A	1	1	0.14		0	0	0	S	1	1	0.002		0	0	0		0	0	0	S	1	1	0.01	S	1	1	0.003
54700	RRN3		0	0	0	R	1	1	0.01		0	0	0		0	0	0		0	0	0	S	1	1	0	S	1	1	0.02	S	3	3	0		0	0	0		0	0	0		0	0	0	S	3	4	0.01
5870	RAB6A		0	0	0	S	1	2	0.07		0	0	0		0	0	0		0	0	0	S	1	3	0.03		0	0	0	S	1	1	0.18	S	1	1	0		0	0	0	S	1	2	0.11	S	2	7	0.28
51560	RAB6B		0	0	0	S	1	2	0.07		0	0	0		0	0	0		0	0	0	S	1	3	0.03		0	0	0	S	1	1	0.18	S	1	1	0		0	0	0	S	1	2	0.11	A	1	4	0
54734	RAB39A		0	0	0	S	1	2	0.06		0	0	0		0	0	0		0	0	0	S	1	3	0.03		0	0	0	S	1	1	0.15	S	1	1	0		0	0	0	S	1	2	0.09	A	1	4	0
378	ARF4		0	0	0	S	1	1	0.01		0	0	0		0	0	0		0	0	0		0	0	0		0	0	0	S	2	3	0.31		0	0	0		0	0	0		0	0	0	R	1	2	0
2261	FGFR3		0	0	0	S	1	1	0.0008		0	0	0		0	0	0		0	0	0		0	0	0		0	0	0	S	1	1	0.002	S	1	1	0.22		0	0	0	S	1	1	0.01	S	1	1	0.003
640	BLK		0	0	0	S	1	1	0.001		0	0	0		0	0	0		0	0	0		0	0	0		0	0	0	S	1	1	0.002		0	0	0		0	0	0	S	1	1	0.02	S	1	1	0.004
2260	FGFR1		0	0	0	S	1	1	0.0008		0	0	0		0	0	0		0	0	0		0	0	0		0	0	0	S	1	1	0.002		0	0	0		0	0	0	S	1	1	0.02	S	1	1	0.003
2263	FGFR2		0	0	0	S	1	1	0.0009		0	0	0		0	0	0		0	0	0		0	0	0		0	0	0	S	1	1	0.002		0	0	0		0	0	0	S	1	1	0.02	S	1	1	0.003
2264	FGFR4		0	0	0	S	1	1	0.0008		0	0	0		0	0	0		0	0	0		0	0	0		0	0	0	S	1	1	0.002		0	0	0		0	0	0	S	1	1	0.02	S	1	1	0.003
2268	FGR		0	0	0	S	1	1	0.001		0	0	0		0	0	0		0	0	0		0	0	0		0	0	0	S	1	1	0.002		0	0	0		0	0	0	S	1	1	0.02	S	1	1	0.004
2534	FYN		0	0	0	S	1	1	0.001		0	0	0		0	0	0		0	0	0		0	0	0		0	0	0	S	1	1	0.003		0	0	0		0	0	0	S	1	1	0.02	S	1	1	0.005
3055	HCK		0	0	0	S	1	1	0.001		0	0	0		0	0	0		0	0	0		0	0	0		0	0	0	S	1	1	0.002		0	0	0		0	0	0	S	1	1	0.02	S	1	1	0.004
3932	LCK		0	0	0	S	1	1	0.001		0	0	0		0	0	0		0	0	0		0	0	0		0	0	0	S	1	1	0.003		0	0	0		0	0	0	S	1	1	0.02	S	1	1	0.005
4067	LYN		0	0	0	S	1	1	0.001		0	0	0		0	0	0		0	0	0		0	0	0		0	0	0	S	1	1	0.002		0	0	0		0	0	0	S	1	1	0.02	S	1	1	0.005
7525	YES1		0	0	0	S	1	1	0.001		0	0	0		0	0	0		0	0	0		0	0	0		0	0	0	S	1	1	0.002		0	0	0		0	0	0	S	1	1	0.02	S	1	1	0.005
22858	ICK		0	0	0	S	1	1	0.0008		0	0	0		0	0	0		0	0	0		0	0	0		0	0	0	S	1	1	0.002		0	0	0		0	0	0	S	1	1	0.01	S	1	1	0.003
23552	CDK20		0	0	0	S	1	1	0.002		0	0	0		0	0	0		0	0	0		0	0	0		0	0	0	S	1	1	0.003		0	0	0		0	0	0	S	1	1	0.03	S	1	1	0.006
9874	TLK1		0	0	0	S	1	2	0		0	0	0		0	0	0		0	0	0		0	0	0		0	0	0	A	1	1	0	A	2	2	0		0	0	0		0	0	0		0	0	0
375	ARF1		0	0	0	S	1	1	0.01		0	0	0		0	0	0		0	0	0		0	0	0		0	0	0	A	1	2	0		0	0	0		0	0	0		0	0	0		0	0	0
377	ARF3		0	0	0	S	1	1	0.01		0	0	0		0	0	0		0	0	0		0	0	0		0	0	0	A	1	2	0		0	0	0		0	0	0		0	0	0		0	0	0
381	ARF5		0	0	0	S	1	1	0.01		0	0	0		0	0	0		0	0	0		0	0	0		0	0	0	A	1	2	0		0	0	0		0	0	0		0	0	0		0	0	0
400986	ANKRD36C		0	0	0	A	1	1	0.004		0	0	0		0	0	0		0	0	0		0	0	0		0	0	0		0	0	0		0	0	0	S	1	1	0.35		0	0	0		0	0	0
57730	ANKRD36B		0	0	0	A	1	1	0.004		0	0	0		0	0	0		0	0	0		0	0	0		0	0	0		0	0	0		0	0	0	S	1	1	0.18		0	0	0		0	0	0
375248	ANKRD36		0	0	0	A	1	1	0.003		0	0	0		0	0	0		0	0	0		0	0	0		0	0	0		0	0	0		0	0	0	S	1	1	0.13		0	0	0		0	0	0
3963	LGALS7		0	0	0	S	1	1	0.09		0	0	0		0	0	0		0	0	0		0	0	0		0	0	0		0	0	0		0	0	0		0	0	0	S	1	2	0		0	0	0
653499	LGALS7B		0	0	0	S	1	1	0.09		0	0	0		0	0	0		0	0	0		0	0	0		0	0	0		0	0	0		0	0	0		0	0	0	S	1	2	0		0	0	0
6257	RXRB		0	0	0	A	1	1	0	S	1	1	0.13	R	1	1	0.07	A	1	1	0		0	0	0	R	2	3	0.8	A	3	3	0		0	0	0	A	1	1	0	S	1	1	0.42	S	2	2	0.07
162	AP1B1		0	0	0	A	2	2	0	S	1	1	0.005	A	3	4	0	A	2	2	0	A	6	8	0	A	2	4	0	A	1	1	0	S	1	2	0.006	A	3	7	0		0	0	0	A	5	6	0
10263	CDK2AP2		0	0	0	A	1	1	0	A	1	1	0		0	0	0	A	1	1	0	A	1	1	0.13	A	1	1	0		0	0	0	A	1	1	0		0	0	0	S	1	1	0.78	A	1	1	0
7862	BRPF1		0	0	0	A	1	1	0		0	0	0	S	1	1	0		0	0	0	A	1	1	0		0	0	0	R	2	2	0.008		0	0	0		0	0	0		0	0	0	R	1	1	0
23369	PUM2		0	0	0	A	1	1	0		0	0	0	R	1	1	0		0	0	0		0	0	0		0	0	0	A	2	2	0	S	1	1	0.82	S	1	1	0.01		0	0	0	A	2	2	0
84726	PRRC2B		0	0	0	A	1	1	0		0	0	0	A	1	1	0		0	0	0	S	2	2	0.002		0	0	0	A	1	1	0		0	0	0	A	1	1	0		0	0	0	S	2	3	0.007
3222	HOXC5		0	0	0	A	1	1	0		0	0	0	A	1	2	0		0	0	0	A	1	1	0	A	1	1	0.19	A	1	1	0	S	1	1	0.22		0	0	0		0	0	0		0	0	0
57466	SCAF4		0	0	0	A	1	1	0		0	0	0	A	1	1	0		0	0	0	A	2	2	0	S	1	1	0.01	A	2	4	0		0	0	0	A	1	1	0		0	0	0	S	3	3	0.005
26958	COPG2		0	0	0	A	1	1	0		0	0	0	A	1	1	0		0	0	0	A	1	2	0	S	1	2	0.009		0	0	0		0	0	0	A	1	1	0		0	0	0	S	3	3	0.03
400966	RGPD1		0	0	0	A	1	1	0		0	0	0	A	2	2	0		0	0	0	A	2	3	0		0	0	0	A	3	4	0	S	1	1	0.05	S	3	4	0.05		0	0	0	S	9	9	0.11
729857	RGPD2		0	0	0	A	1	1	0		0	0	0	A	2	2	0		0	0	0	A	2	3	0		0	0	0	A	3	4	0	S	1	1	0.05	S	3	4	0.05		0	0	0	S	9	9	0.11
23466	CBX6		0	0	0	A	1	1	0		0	0	0	A	1	2	0		0	0	0		0	0	0		0	0	0	S	2	2	0		0	0	0		0	0	0		0	0	0	A	1	1	0
5861	RAB1A		0	0	0	A	2	3	0		0	0	0		0	0	0		0	0	0	S	2	4	0.11	S	1	2	0.09	S	4	4	0.83	S	1	1	0	S	1	1	0	S	1	2	0.02	S	3	6	0.04
51755	CDK12		0	0	0	A	1	1	0		0	0	0		0	0	0		0	0	0	S	2	4	0.009		0	0	0	S	2	2	0.01		0	0	0		0	0	0	A	1	1	0	S	3	5	0.03
81876	RAB1B		0	0	0	A	2	3	0		0	0	0		0	0	0		0	0	0	A	1	3	0	S	1	2	0.08	A	3	3	0	S	1	1	0		0	0	0	S	1	2	0.02	A	2	5	0
4218	RAB8A		0	0	0	A	2	3	0		0	0	0		0	0	0		0	0	0	A	1	3	0	S	1	2	0.09	A	2	2	0	S	1	1	0		0	0	0	S	1	2	0.02	A	2	5	0
10890	RAB10		0	0	0	A	2	3	0		0	0	0		0	0	0		0	0	0	A	1	3	0	S	1	2	0.09	A	2	2	0	S	1	1	0		0	0	0	S	1	2	0.02	A	2	5	0
51762	RAB8B		0	0	0	A	2	3	0		0	0	0		0	0	0		0	0	0	A	1	3	0	S	1	2	0.1	A	2	2	0	S	1	1	0		0	0	0	S	1	2	0.02	A	2	5	0
51552	RAB14		0	0	0	A	1	2	0		0	0	0		0	0	0		0	0	0	A	1	3	0		0	0	0	S	2	2	0.45	S	1	1	0		0	0	0	S	1	2	0.01	A	1	4	0
27314	RAB30		0	0	0	A	1	2	0		0	0	0		0	0	0		0	0	0	A	1	3	0		0	0	0	S	2	2	0.51	S	1	1	0		0	0	0	S	1	2	0.02	A	1	4	0
5864	RAB3A		0	0	0	A	1	2	0		0	0	0		0	0	0		0	0	0	A	1	3	0		0	0	0	A	1	1	0	S	1	1	0		0	0	0	S	1	2	0.02	A	1	4	0
5865	RAB3B		0	0	0	A	1	2	0		0	0	0		0	0	0		0	0	0	A	1	3	0		0	0	0	A	1	1	0	S	1	1	0		0	0	0	S	1	2	0.02	A	1	4	0
5867	RAB4A		0	0	0	A	1	2	0		0	0	0		0	0	0		0	0	0	A	1	3	0		0	0	0	A	1	1	0	S	1	1	0		0	0	0	S	1	2	0.02	A	1	4	0
9545	RAB3D		0	0	0	A	1	2	0		0	0	0		0	0	0		0	0	0	A	1	3	0		0	0	0	A	1	1	0	S	1	1	0		0	0	0	S	1	2	0.02	A	1	4	0
53916	RAB4B		0	0	0	A	1	2	0		0	0	0		0	0	0		0	0	0	A	1	3	0		0	0	0	A	1	1	0	S	1	1	0		0	0	0	S	1	2	0.02	A	1	4	0
115827	RAB3C		0	0	0	A	1	2	0		0	0	0		0	0	0		0	0	0	A	1	3	0		0	0	0	A	1	1	0	S	1	1	0		0	0	0	S	1	2	0.02	A	1	4	0
116442	RAB39B		0	0	0	A	1	2	0		0	0	0		0	0	0		0	0	0	A	1	3	0		0	0	0	A	1	1	0	S	1	1	0		0	0	0	S	1	2	0.01	A	1	4	0
201475	RAB12		0	0	0	A	1	2	0		0	0	0		0	0	0		0	0	0	A	1	3	0		0	0	0	A	1	1	0	S	1	1	0		0	0	0	S	1	2	0.01	A	1	4	0
326624	RAB37		0	0	0	A	1	2	0		0	0	0		0	0	0		0	0	0	A	1	3	0		0	0	0	A	1	1	0	S	1	1	0		0	0	0	S	1	2	0.01	A	1	4	0
339122	RAB43		0	0	0	A	1	2	0		0	0	0		0	0	0		0	0	0	A	1	3	0		0	0	0	A	1	1	0	S	1	1	0		0	0	0	S	1	2	0.02	A	1	4	0
5872	RAB13		0	0	0	A	1	1	0		0	0	0		0	0	0		0	0	0		0	0	0	S	1	2	0.1	A	1	1	0		0	0	0		0	0	0		0	0	0	A	1	1	0
1017	CDK2		0	0	0	A	1	1	0		0	0	0		0	0	0		0	0	0		0	0	0		0	0	0	S	2	2	0.03		0	0	0		0	0	0	A	1	1	0	S	2	2	0.03
1018	CDK3		0	0	0	A	1	1	0		0	0	0		0	0	0		0	0	0		0	0	0		0	0	0	S	2	2	0.03		0	0	0		0	0	0	A	1	1	0	S	2	2	0.03
983	CDK1		0	0	0	A	1	1	0		0	0	0		0	0	0		0	0	0		0	0	0		0	0	0	A	1	1	0		0	0	0		0	0	0	A	1	1	0	S	2	2	0.05
117143	TADA1		0	0	0		0	0	0	S	2	5	3.5	S	2	2	0.6	S	2	2	1.7	S	1	1	0.19	S	2	2	2.7	S	3	4	0.36	S	3	10	3.1	S	2	2	0.34	S	1	2	1.1	S	2	2	0.38
9412	MED21		0	0	0		0	0	0	S	1	3	0	S	1	3	0.33	S	1	2	0	S	1	1	0	S	1	4	1	S	1	1	0.23	S	1	1	0.2		0	0	0	S	1	1	0.35		0	0	0
22989	MYH15		0	0	0		0	0	0	R	1	1	0.03	R	1	1	0.04	S	1	1	0.02	S	2	2	0.04		0	0	0		0	0	0		0	0	0		0	0	0		0	0	0		0	0	0
8407	TAGLN2		0	0	0		0	0	0	A	1	1	0.08	A	1	1	0.05	A	1	1	0.14		0	0	0	S	1	9	0.34	A	1	1	0	S	1	3	1.7		0	0	0		0	0	0		0	0	0
84108	PCGF6		0	0	0		0	0	0	S	1	1	0.18	S	1	2	0	S	2	2	0.06		0	0	0	S	2	2	0.21	S	1	1	0.05		0	0	0	S	1	2	0.06	S	1	1	0.08	S	1	1	0
5994	RFXAP		0	0	0		0	0	0	S	1	2	0	S	1	1	0.09	S	1	2	0.17		0	0	0	S	1	5	0		0	0	0	S	1	4	0.13		0	0	0	S	1	2	0.1	S	1	1	0
84456	L3MBTL3		0	0	0		0	0	0	S	1	1	0	R	1	1	0.01	R	3	5	0.19		0	0	0	S	3	5	0.13		0	0	0	S	1	2	0.02		0	0	0	S	1	1	0		0	0	0
1842	ECM2		0	0	0		0	0	0	S	1	1	0.08	R	1	1	0.06		0	0	0	R	1	1	0.07	R	1	1	0.05	R	1	1	0.03	S	1	1	0.08		0	0	0		0	0	0	S	1	1	0.05
54954	FAM120C		0	0	0		0	0	0	A	1	1	0.26	S	1	2	0.01		0	0	0	S	1	1	0.01	R	1	1	0	S	1	1	0.006		0	0	0	S	1	1	0.01		0	0	0	S	1	1	0.01
6881	TAF10		0	0	0		0	0	0	S	1	1	0.54	S	2	3	0.42		0	0	0	R	1	2	0		0	0	0	S	2	3	0.5	S	1	2	0.54	S	2	2	0.3	S	1	3	0.57	S	2	2	0.37
2963	GTF2F2		0	0	0		0	0	0	A	1	1	0	S	1	1	0		0	0	0	S	1	1	0.07		0	0	0	S	1	1	0.11		0	0	0	S	1	1	0.04	S	1	1	0.2		0	0	0
55257	MRGBP		0	0	0		0	0	0	S	1	1	0.1	S	1	1	0		0	0	0	S	1	3	0.06		0	0	0	S	1	3	0.07		0	0	0	S	1	4	0.07		0	0	0	S	1	2	0.04
9646	CTR9		0	0	0		0	0	0	A	1	1	0.04	S	1	4	0		0	0	0	R	1	1	0.006		0	0	0		0	0	0		0	0	0	S	1	3	0		0	0	0	S	2	4	0.03
85441	HELZ2		0	0	0		0	0	0	A	1	1	0	S	1	1	0.006		0	0	0		0	0	0	A	1	1	0.08		0	0	0	S	1	1	0.02	S	1	1	0.002		0	0	0		0	0	0
10529	NEBL		0	0	0		0	0	0	R	1	1	0	A	1	1	0.07		0	0	0		0	0	0		0	0	0	S	2	2	0.07		0	0	0		0	0	0		0	0	0		0	0	0
57728	WDR19		0	0	0		0	0	0	A	1	1	0	A	1	2	0.01		0	0	0		0	0	0		0	0	0		0	0	0		0	0	0	S	1	1	0		0	0	0		0	0	0
55588	MED29		0	0	0		0	0	0	S	1	1	0	S	2	3	0.17		0	0	0		0	0	0		0	0	0		0	0	0		0	0	0		0	0	0	S	1	1	0	A	1	1	0.05
8648	NCOA1		0	0	0		0	0	0	S	1	1	0.02	S	2	2	0.006		0	0	0		0	0	0		0	0	0		0	0	0		0	0	0		0	0	0		0	0	0		0	0	0
4627	MYH9		0	0	0		0	0	0	S	1	1	0.3	S	1	1	0	A	1	1	0.008	S	1	1	0		0	0	0		0	0	0		0	0	0	S	1	1	0		0	0	0	A	1	1	0
79784	MYH14		0	0	0		0	0	0	A	1	1	0.03	S	1	1	0		0	0	0	S	1	1	0		0	0	0		0	0	0		0	0	0	S	1	1	0		0	0	0	A	1	1	0
4683	NBN		0	0	0		0	0	0	R	1	1	0.05		0	0	0	S	2	2	0.11	S	1	1	0	S	1	1	0.06	R	1	1	0	S	2	2	0.13		0	0	0	S	1	1	0.04	R	1	1	0
91151	TIGD7		0	0	0		0	0	0	S	1	2	0.16		0	0	0	R	1	1	0.17	R	1	1	0	R	1	2	0.18		0	0	0		0	0	0		0	0	0		0	0	0		0	0	0
51332	SPTBN5		0	0	0		0	0	0	A	1	2	0		0	0	0	A	2	2	0.03	A	1	1	0.004		0	0	0		0	0	0	S	1	1	0	S	1	1	0.02		0	0	0		0	0	0
25976	TIPARP		0	0	0		0	0	0	A	1	1	0.13		0	0	0	R	1	1	0.17	R	1	1	0.06		0	0	0		0	0	0	S	1	1	0.1		0	0	0	S	1	1	0.03	S	1	1	0.05
23041	MON2		0	0	0		0	0	0	S	1	1	0.03		0	0	0	R	1	1	0	A	1	1	0.02		0	0	0		0	0	0		0	0	0		0	0	0		0	0	0		0	0	0
84083	ZRANB3		0	0	0		0	0	0	S	1	1	0		0	0	0	S	1	1	0.02		0	0	0	S	1	1	0	S	1	1	0	S	2	4	0.08		0	0	0	S	2	3	0.06		0	0	0
26122	EPC2		0	0	0		0	0	0	S	2	3	0.07		0	0	0	S	1	1	0.02		0	0	0	R	2	2	0.08	S	2	2	0.008	S	3	6	0.08		0	0	0	S	2	2	0.11		0	0	0
58486	ZBED5		0	0	0		0	0	0	A	1	1	0		0	0	0	R	2	2	0.06		0	0	0	S	1	1	0.06	S	1	1	0	S	1	1	0.05		0	0	0		0	0	0		0	0	0
22929	SEPHS1		0	0	0		0	0	0	S	2	3	0.09		0	0	0	S	1	2	0.62		0	0	0	S	3	3	0.72	R	1	3	0.09		0	0	0		0	0	0	S	1	1	0.65		0	0	0
84515	MCM8		0	0	0		0	0	0	S	5	6	0.2		0	0	0	S	4	7	0.13		0	0	0	S	2	2	0.07		0	0	0	S	4	4	0.17		0	0	0	S	2	2	0.04		0	0	0
2309	FOXO3		0	0	0		0	0	0	S	1	2	0.14		0	0	0	S	1	2	0.08		0	0	0	S	1	2	0.06		0	0	0	S	1	1	0.06		0	0	0	S	1	1	0.15		0	0	0
9013	TAF1C		0	0	0		0	0	0	A	1	1	0.03		0	0	0	S	2	4	0.02		0	0	0	A	2	2	0.03		0	0	0	S	2	2	0.08		0	0	0		0	0	0		0	0	0
221409	SPATS1		0	0	0		0	0	0	A	1	2	2		0	0	0	A	1	1	0.25		0	0	0	S	1	1	0.47		0	0	0		0	0	0		0	0	0		0	0	0		0	0	0
1756	DMD		0	0	0		0	0	0	R	1	1	0.18		0	0	0	A	1	1	0.14		0	0	0		0	0	0	A	1	1	0.12	S	1	1	0.14		0	0	0		0	0	0		0	0	0
122060	SLAIN1		0	0	0		0	0	0	S	1	1	0.85		0	0	0	R	1	1	0.58		0	0	0		0	0	0		0	0	0	S	2	2	0.51		0	0	0	S	1	1	0.59		0	0	0
1769	DNAH8		0	0	0		0	0	0	A	1	1	0.1		0	0	0	A	1	1	0.007		0	0	0		0	0	0		0	0	0	S	1	1	0.006		0	0	0		0	0	0	A	1	1	0.004
7273	TTN		0	0	0		0	0	0	A	1	1	0.18		0	0	0	S	2	2	0.0008		0	0	0		0	0	0		0	0	0	S	1	1	0.0006		0	0	0		0	0	0		0	0	0
338	APOB		0	0	0		0	0	0	A	1	1	0		0	0	0	A	1	1	0.14		0	0	0		0	0	0		0	0	0	S	1	1	0.11		0	0	0		0	0	0		0	0	0
50640	PNPLA8		0	0	0		0	0	0	A	1	4	0.07		0	0	0	A	1	1	0.02		0	0	0		0	0	0		0	0	0		0	0	0	S	1	2	0.005		0	0	0		0	0	0
80201	HKDC1		0	0	0		0	0	0	A	1	1	1.4		0	0	0	A	1	1	1.7		0	0	0		0	0	0		0	0	0		0	0	0	S	1	1	0.55		0	0	0		0	0	0
27127	SMC1B		0	0	0		0	0	0	A	1	1	0.02		0	0	0	A	1	1	0.11		0	0	0		0	0	0		0	0	0		0	0	0		0	0	0	S	1	1	0		0	0	0
4839	NOP2		0	0	0		0	0	0	S	1	1	0.02		0	0	0	S	2	4	0.14		0	0	0		0	0	0		0	0	0		0	0	0		0	0	0		0	0	0		0	0	0
6709	SPTAN1		0	0	0		0	0	0	S	1	1	0		0	0	0	R	1	1	0.01		0	0	0		0	0	0		0	0	0		0	0	0		0	0	0		0	0	0		0	0	0
285761	DCBLD1		0	0	0		0	0	0	A	1	1	0.03		0	0	0	S	1	1	0.08		0	0	0		0	0	0		0	0	0		0	0	0		0	0	0		0	0	0		0	0	0
11107	PRDM5		0	0	0		0	0	0	R	1	1	0.02		0	0	0		0	0	0	A	1	1	0	S	1	2	0.03	R	1	1	0	S	1	1	0.04		0	0	0		0	0	0	R	1	1	0.02
10129	FRY		0	0	0		0	0	0	S	1	2	0.03		0	0	0		0	0	0	S	1	1	0.01	S	1	1	0.02	A	1	1	0.007		0	0	0	S	1	1	0.01		0	0	0		0	0	0
139818	DOCK11		0	0	0		0	0	0	A	1	1	2.1		0	0	0		0	0	0	A	1	1	1.6	A	1	1	2.9		0	0	0		0	0	0		0	0	0	S	1	1	2	R	1	1	1.3
142678	MIB2		0	0	0		0	0	0	R	1	1	0.005		0	0	0		0	0	0	R	1	1	0.008		0	0	0		0	0	0		0	0	0	S	1	1	0.006		0	0	0	A	1	1	0.03
54464	XRN1		0	0	0		0	0	0	A	1	1	0.01		0	0	0		0	0	0	A	1	1	0		0	0	0		0	0	0		0	0	0	S	1	1	0.01		0	0	0	S	1	1	0
164832	LONRF2		0	0	0		0	0	0	A	1	1	0.8		0	0	0		0	0	0	S	1	1	0.26		0	0	0		0	0	0		0	0	0	S	1	1	0.03		0	0	0		0	0	0
2475	MTOR		0	0	0		0	0	0	A	1	1	0.02		0	0	0		0	0	0	A	2	2	0.03		0	0	0		0	0	0		0	0	0		0	0	0		0	0	0	S	1	1	0.004
5885	RAD21		0	0	0		0	0	0	S	1	1	0.03		0	0	0		0	0	0		0	0	0	S	1	1	0.03		0	0	0	S	1	1	0.05		0	0	0	S	1	1	0	R	1	1	0
404672	GTF2H5		0	0	0		0	0	0	S	1	1	0		0	0	0		0	0	0		0	0	0	S	1	1	0		0	0	0	S	1	1	0		0	0	0		0	0	0		0	0	0
57580	PREX1		0	0	0		0	0	0	R	2	2	0.05		0	0	0		0	0	0		0	0	0	R	1	1	0.08		0	0	0	S	1	1	0.05		0	0	0		0	0	0		0	0	0
6991	TCTE3		0	0	0		0	0	0	R	1	1	0		0	0	0		0	0	0		0	0	0	R	1	1	0.63		0	0	0		0	0	0	S	1	1	0.15		0	0	0		0	0	0
1665	DHX15		0	0	0		0	0	0	A	1	1	0		0	0	0		0	0	0		0	0	0	S	1	1	0.02		0	0	0		0	0	0	S	1	1	0.09		0	0	0		0	0	0
346689	KLRG2		0	0	0		0	0	0	A	1	1	3.8		0	0	0		0	0	0		0	0	0	R	1	1	3		0	0	0		0	0	0	S	1	1	1.3		0	0	0		0	0	0
90410	IFT20		0	0	0		0	0	0	S	1	1	0.69		0	0	0		0	0	0		0	0	0	S	1	1	0.46		0	0	0		0	0	0		0	0	0		0	0	0	R	1	1	0.18
7267	TTC3		0	0	0		0	0	0	R	1	2	0.02		0	0	0		0	0	0		0	0	0		0	0	0	R	1	1	0.02	S	1	1	0.02		0	0	0	S	1	1	0.02		0	0	0
1286	COL4A4		0	0	0		0	0	0	S	1	1	0.04		0	0	0		0	0	0		0	0	0		0	0	0	R	1	1	0.02		0	0	0		0	0	0		0	0	0		0	0	0
9843	HEPH		0	0	0		0	0	0	A	1	1	0.03		0	0	0		0	0	0		0	0	0		0	0	0		0	0	0	S	1	2	0.1	S	2	2	0.03	S	1	1	0		0	0	0
8029	CUBN		0	0	0		0	0	0	S	1	1	0.04		0	0	0		0	0	0		0	0	0		0	0	0		0	0	0	S	1	1	0		0	0	0	S	1	1	0.03		0	0	0
8668	EIF3I		0	0	0		0	0	0	S	1	1	1.2		0	0	0		0	0	0		0	0	0		0	0	0		0	0	0	S	1	1	0.89		0	0	0	S	1	1	0.91		0	0	0
165530	CLEC4F		0	0	0		0	0	0	R	1	1	0.19		0	0	0		0	0	0		0	0	0		0	0	0		0	0	0	S	1	1	0.21		0	0	0	S	1	2	0		0	0	0
11136	SLC7A9		0	0	0		0	0	0	S	1	1	0.02		0	0	0		0	0	0		0	0	0		0	0	0		0	0	0	S	1	1	0.12		0	0	0		0	0	0		0	0	0
51253	MRPL37		0	0	0		0	0	0	A	1	1	0.04		0	0	0		0	0	0		0	0	0		0	0	0		0	0	0	S	1	1	0.02		0	0	0		0	0	0		0	0	0
55142	HAUS2		0	0	0		0	0	0	A	1	1	0		0	0	0		0	0	0		0	0	0		0	0	0		0	0	0	S	1	1	0.19		0	0	0		0	0	0		0	0	0
4130	MAP1A		0	0	0		0	0	0	A	1	1	0.005		0	0	0		0	0	0		0	0	0		0	0	0		0	0	0	S	1	1	0.06		0	0	0		0	0	0		0	0	0
11231	SEC63		0	0	0		0	0	0	A	1	1	0		0	0	0		0	0	0		0	0	0		0	0	0		0	0	0	S	1	1	0.05		0	0	0		0	0	0		0	0	0
23370	ARHGEF18		0	0	0		0	0	0	A	1	1	0.03		0	0	0		0	0	0		0	0	0		0	0	0		0	0	0	S	1	1	0.01		0	0	0		0	0	0		0	0	0
54831	BEST2		0	0	0		0	0	0	A	1	1	1.4		0	0	0		0	0	0		0	0	0		0	0	0		0	0	0	S	1	1	0.71		0	0	0		0	0	0		0	0	0
55075	UACA		0	0	0		0	0	0	S	1	1	0.28		0	0	0		0	0	0		0	0	0		0	0	0		0	0	0		0	0	0	S	1	1	0.007	S	1	1	0.2		0	0	0
2200	FBN1		0	0	0		0	0	0	A	1	1	0.005		0	0	0		0	0	0		0	0	0		0	0	0		0	0	0		0	0	0	S	1	1	0		0	0	0		0	0	0
10117	ENAM		0	0	0		0	0	0	A	1	1	0.18		0	0	0		0	0	0		0	0	0		0	0	0		0	0	0		0	0	0	S	1	1	0.05		0	0	0		0	0	0
124783	SPATA32		0	0	0		0	0	0	A	1	2	0.35		0	0	0		0	0	0		0	0	0		0	0	0		0	0	0		0	0	0	S	1	1	0		0	0	0		0	0	0
728621	CCDC30		0	0	0		0	0	0	A	1	1	0.01		0	0	0		0	0	0		0	0	0		0	0	0		0	0	0		0	0	0	S	1	1	0		0	0	0		0	0	0
4620	MYH2		0	0	0		0	0	0	S	2	2	0.25		0	0	0		0	0	0		0	0	0		0	0	0		0	0	0		0	0	0		0	0	0	S	1	1	0	S	1	1	0.006
2171	FABP5		0	0	0		0	0	0	S	1	1	0.13		0	0	0		0	0	0		0	0	0		0	0	0		0	0	0		0	0	0		0	0	0	S	1	2	0.86		0	0	0
80198	MUS81		0	0	0		0	0	0	S	1	1	0		0	0	0		0	0	0		0	0	0		0	0	0		0	0	0		0	0	0		0	0	0	S	1	1	0.04		0	0	0
57608	KIAA1462		0	0	0		0	0	0	R	1	1	0		0	0	0		0	0	0		0	0	0		0	0	0		0	0	0		0	0	0		0	0	0	S	1	1	0.001		0	0	0
154807	VKORC1L1		0	0	0		0	0	0	R	1	1	0.41		0	0	0		0	0	0		0	0	0		0	0	0		0	0	0		0	0	0		0	0	0	S	1	1	0.32		0	0	0
340654	LIPM		0	0	0		0	0	0	R	1	1	0		0	0	0		0	0	0		0	0	0		0	0	0		0	0	0		0	0	0		0	0	0	S	1	1	0.11		0	0	0
7965	AIMP2		0	0	0		0	0	0	R	1	1	0.02		0	0	0		0	0	0		0	0	0		0	0	0		0	0	0		0	0	0		0	0	0	S	1	1	0.04		0	0	0
81501	DCSTAMP		0	0	0		0	0	0	R	1	1	0.06		0	0	0		0	0	0		0	0	0		0	0	0		0	0	0		0	0	0		0	0	0	S	1	1	0		0	0	0
344787	ZNF860		0	0	0		0	0	0	R	1	1	0.13		0	0	0		0	0	0		0	0	0		0	0	0		0	0	0		0	0	0		0	0	0	S	1	1	0.14		0	0	0
4600	MX2		0	0	0		0	0	0	A	1	2	0.07		0	0	0		0	0	0		0	0	0		0	0	0		0	0	0		0	0	0		0	0	0	S	1	1	0		0	0	0
27183	VPS4A		0	0	0		0	0	0	A	1	1	0.24		0	0	0		0	0	0		0	0	0		0	0	0		0	0	0		0	0	0		0	0	0	S	1	1	0		0	0	0
338755	OR2AG2		0	0	0		0	0	0	A	1	1	0.17		0	0	0		0	0	0		0	0	0		0	0	0		0	0	0		0	0	0		0	0	0	S	1	1	0.05		0	0	0
23660	ZKSCAN5		0	0	0		0	0	0	S	2	3	0.13		0	0	0		0	0	0		0	0	0		0	0	0		0	0	0		0	0	0		0	0	0	A	1	2	0		0	0	0
2002	ELK1		0	0	0		0	0	0	S	1	1	0		0	0	0		0	0	0		0	0	0		0	0	0		0	0	0		0	0	0		0	0	0		0	0	0	S	1	1	0
4626	MYH8		0	0	0		0	0	0	S	1	1	0.08		0	0	0		0	0	0		0	0	0		0	0	0		0	0	0		0	0	0		0	0	0		0	0	0	S	1	1	0.02
80829	ZFP91		0	0	0		0	0	0	A	1	1	0.01		0	0	0		0	0	0		0	0	0		0	0	0		0	0	0		0	0	0		0	0	0		0	0	0	S	1	1	0.01
10142	AKAP9		0	0	0		0	0	0	A	2	2	0.007		0	0	0		0	0	0		0	0	0		0	0	0		0	0	0		0	0	0		0	0	0		0	0	0	S	1	1	0.001
2634	GBP2		0	0	0		0	0	0	S	1	1	0.07		0	0	0		0	0	0		0	0	0		0	0	0		0	0	0		0	0	0		0	0	0		0	0	0		0	0	0
55702	CCDC94		0	0	0		0	0	0	S	1	1	0.13		0	0	0		0	0	0		0	0	0		0	0	0		0	0	0		0	0	0		0	0	0		0	0	0		0	0	0
161829	EXD1		0	0	0		0	0	0	S	1	1	0		0	0	0		0	0	0		0	0	0		0	0	0		0	0	0		0	0	0		0	0	0		0	0	0		0	0	0
167691	LCA5		0	0	0		0	0	0	S	1	1	0.15		0	0	0		0	0	0		0	0	0		0	0	0		0	0	0		0	0	0		0	0	0		0	0	0		0	0	0
79058	ASPSCR1		0	0	0		0	0	0	S	1	1	0.54		0	0	0		0	0	0		0	0	0		0	0	0		0	0	0		0	0	0		0	0	0		0	0	0		0	0	0
283464	GXYLT1		0	0	0		0	0	0	S	1	1	0.04		0	0	0		0	0	0		0	0	0		0	0	0		0	0	0		0	0	0		0	0	0		0	0	0		0	0	0
4009	LMX1A		0	0	0		0	0	0	R	1	1	0.03	S	2	3	0.17	R	1	1	0.03		0	0	0		0	0	0		0	0	0	S	1	1	0.09	S	1	1	0	S	1	1	0.06	S	1	1	0
4010	LMX1B		0	0	0		0	0	0	R	1	1	0.02	S	2	3	0.14	R	1	1	0.03		0	0	0		0	0	0		0	0	0	S	1	1	0.07	S	1	1	0	S	1	1	0.05	S	1	1	0
23241	PACS2		0	0	0		0	0	0	R	1	1	0.26		0	0	0	A	1	1	1.9	A	1	1	0.05		0	0	0		0	0	0	S	1	1	0.32		0	0	0		0	0	0		0	0	0
55249	YY1AP1		0	0	0		0	0	0	S	2	3	0.04		0	0	0	S	3	4	0.02		0	0	0	A	1	4	0		0	0	0	S	2	5	0.04		0	0	0	S	2	2	0.08	A	1	1	0
5515	PPP2CA		0	0	0		0	0	0	S	1	1	0.22		0	0	0		0	0	0	S	1	1	0	R	1	1	0.3	S	1	3	0.04	S	1	1	0.03	S	1	1	0.08		0	0	0		0	0	0
5516	PPP2CB		0	0	0		0	0	0	S	1	1	0.22		0	0	0		0	0	0	S	1	1	0	R	1	1	0.3	S	1	3	0.04	S	1	1	0.03	S	1	1	0.08		0	0	0		0	0	0
145781	GCOM1		0	0	0		0	0	0	A	1	1	0.04		0	0	0		0	0	0	A	1	1	0		0	0	0	A	1	1	0		0	0	0		0	0	0	S	1	1	0.09		0	0	0
55690	PACS1		0	0	0		0	0	0	R	1	1	0.22		0	0	0		0	0	0	A	1	1	0.04		0	0	0		0	0	0	S	1	1	0.26		0	0	0		0	0	0	A	1	2	0
9355	LHX2		0	0	0		0	0	0	R	1	1	0.11		0	0	0		0	0	0		0	0	0	S	1	2	0.1		0	0	0		0	0	0		0	0	0		0	0	0		0	0	0
56956	LHX9		0	0	0		0	0	0	R	1	1	0.11		0	0	0		0	0	0		0	0	0	S	1	2	0.09		0	0	0		0	0	0		0	0	0		0	0	0		0	0	0
81488	POLR2M		0	0	0		0	0	0	A	1	1	0.07		0	0	0		0	0	0		0	0	0		0	0	0		0	0	0		0	0	0		0	0	0	S	1	1	0.15		0	0	0
4619	MYH1		0	0	0		0	0	0	A	1	1	0		0	0	0		0	0	0		0	0	0		0	0	0		0	0	0		0	0	0		0	0	0		0	0	0	S	1	1	0.006
4622	MYH4		0	0	0		0	0	0	A	1	1	0		0	0	0		0	0	0		0	0	0		0	0	0		0	0	0		0	0	0		0	0	0		0	0	0	S	1	1	0.006
6667	SP1		0	0	0		0	0	0		0	0	0	S	1	3	0	S	2	2	0.14	S	1	3	0.2	S	2	3	0.02	S	1	2	0		0	0	0	S	1	1	0	S	1	1	0	S	1	2	0.01
9585	KIF20B		0	0	0		0	0	0		0	0	0	S	1	1	0	S	1	1	0	S	4	5	0.02	A	1	1	0.006	S	4	9	0.005		0	0	0	S	5	5	0.005	S	1	1	0.008	S	7	10	0.05
25937	WWTR1		0	0	0		0	0	0		0	0	0	S	1	4	0.1	A	1	2	0.05	S	1	2	0.08		0	0	0	S	1	3	0	S	1	1	0.14	S	1	2	0	S	1	2	0	S	2	5	0.006
2051	EPHB6		0	0	0		0	0	0		0	0	0	R	2	2	0.03	R	1	1	0.02	S	1	1	0.04		0	0	0	S	1	1	0.03		0	0	0	S	1	1	0		0	0	0		0	0	0
341640	FREM2		0	0	0		0	0	0		0	0	0	R	2	2	0.02	S	1	2	0.13	R	1	1	0.02		0	0	0	S	1	1	0.02		0	0	0		0	0	0		0	0	0	R	1	1	0.009
401024	FSIP2		0	0	0		0	0	0		0	0	0	S	1	1	0.003	R	1	1	0.008	S	1	1	0.005		0	0	0		0	0	0	S	1	1	0.009		0	0	0		0	0	0	S	2	2	0.003
51667	NUB1		0	0	0		0	0	0		0	0	0	R	1	1	0.15	S	1	1	0		0	0	0	S	1	1	0	R	1	1	0.08		0	0	0		0	0	0	S	1	1	0.25		0	0	0
54798	DCHS2		0	0	0		0	0	0		0	0	0	A	1	1	0.02	R	1	1	0.36		0	0	0	R	1	1	0.41		0	0	0	S	1	1	0.26		0	0	0	S	1	1	0.19		0	0	0
4097	MAFG		0	0	0		0	0	0		0	0	0	S	1	2	0.11	A	1	1	0.63		0	0	0		0	0	0		0	0	0	S	1	2	0.54		0	0	0		0	0	0	R	1	1	0
51366	UBR5		0	0	0		0	0	0		0	0	0	A	1	1	0	S	1	1	0		0	0	0		0	0	0		0	0	0		0	0	0	S	1	1	0		0	0	0	S	6	7	0
140803	TRPM6		0	0	0		0	0	0		0	0	0	A	1	2	0.01	R	1	1	0		0	0	0		0	0	0		0	0	0		0	0	0	S	1	2	0		0	0	0		0	0	0
57510	XPO5		0	0	0		0	0	0		0	0	0	A	1	1	0	A	1	1	0.11		0	0	0		0	0	0		0	0	0		0	0	0	S	1	1	0.004		0	0	0		0	0	0
55930	MYO5C		0	0	0		0	0	0		0	0	0	A	1	1	0.02	A	1	1	0.01		0	0	0		0	0	0		0	0	0		0	0	0		0	0	0	S	1	1	0.02		0	0	0
84260	TCHP		0	0	0		0	0	0		0	0	0	S	1	1	0.19	S	1	1	0.56		0	0	0		0	0	0		0	0	0		0	0	0		0	0	0		0	0	0		0	0	0
112939	NACC1		0	0	0		0	0	0		0	0	0	S	1	1	0.21		0	0	0	S	1	1	0.29	S	1	2	0.32	S	2	3	0.08	S	1	1	0.18	S	1	1	0.12	S	1	1	0.19	S	2	3	0.37
5723	PSPH		0	0	0		0	0	0		0	0	0	A	1	5	0.66		0	0	0	A	1	1	0.68	A	1	3	1.9	A	1	1	0.03	S	1	1	0.68	S	1	5	3.3		0	0	0	A	1	4	2.2
2957	GTF2A1		0	0	0		0	0	0		0	0	0	S	1	2	0		0	0	0	S	1	2	0	R	1	1	0.18	A	1	1	0		0	0	0	S	1	1	0	S	1	1	0.12		0	0	0
9276	COPB2		0	0	0		0	0	0		0	0	0	S	2	4	0.002		0	0	0	S	6	8	0.08	R	1	1	0.72	S	7	12	0.15		0	0	0	S	1	1	0		0	0	0	S	3	3	0.04
4154	MBNL1		0	0	0		0	0	0		0	0	0	S	1	1	0.21		0	0	0	S	1	1	0.31	R	1	1	0.42	S	4	5	2.4		0	0	0	S	1	1	0.18		0	0	0	S	1	1	0.2
2189	FANCG		0	0	0		0	0	0		0	0	0	S	1	2	0.02		0	0	0	S	1	1	0.005	S	1	2	0.03	S	2	2	0		0	0	0	S	1	3	0.02		0	0	0		0	0	0
10594	PRPF8		0	0	0		0	0	0		0	0	0	S	1	1	0.003		0	0	0	S	2	2	0.007	A	1	1	0		0	0	0		0	0	0	S	1	2	0.001		0	0	0	S	4	4	0.01
8568	RRP1		0	0	0		0	0	0		0	0	0	S	1	1	0		0	0	0	S	1	3	0.02	S	1	1	0		0	0	0		0	0	0		0	0	0		0	0	0	S	2	3	0.007
84948	TIGD5		0	0	0		0	0	0		0	0	0	S	1	1	0.04		0	0	0	S	1	1	0.02		0	0	0	S	3	5	0	S	1	1	0.04		0	0	0	S	1	1	0	S	1	1	0.02
196528	ARID2		0	0	0		0	0	0		0	0	0	S	1	1	0.01		0	0	0	S	3	3	0.03		0	0	0	S	1	1	0.01		0	0	0	S	1	1	0.01	S	1	1	0.01	S	2	2	0.04
8089	YEATS4		0	0	0		0	0	0		0	0	0	S	1	2	0.03		0	0	0	S	1	2	0		0	0	0	S	3	4	0.15		0	0	0	S	1	2	0		0	0	0	S	1	2	0
84289	ING5		0	0	0		0	0	0		0	0	0	S	1	1	0.12		0	0	0	S	1	2	0.13		0	0	0	S	1	1	0.11		0	0	0	S	1	1	0.05		0	0	0	S	1	1	0.05
23451	SF3B1		0	0	0		0	0	0		0	0	0	S	2	3	0.04		0	0	0	R	3	3	0.07		0	0	0	S	3	4	0		0	0	0	S	2	2	0		0	0	0	S	3	5	0.04
23158	TBC1D9		0	0	0		0	0	0		0	0	0	S	1	1	0		0	0	0	S	1	1	0		0	0	0	S	4	5	0.02		0	0	0	S	1	1	0		0	0	0	S	7	7	0.06
871	SERPINH1		0	0	0		0	0	0		0	0	0	S	1	2	0		0	0	0	S	1	2	0		0	0	0	S	2	6	0.02		0	0	0	S	1	2	0		0	0	0	S	1	5	0
10207	INADL		0	0	0		0	0	0		0	0	0	S	3	3	0		0	0	0	S	3	3	0.006		0	0	0	R	2	2	0		0	0	0	S	2	2	0.003		0	0	0	R	2	3	0
55752	SEPT11		0	0	0		0	0	0		0	0	0	R	1	1	0		0	0	0	S	1	1	0.06		0	0	0	S	4	6	0.33		0	0	0	S	1	1	0.03		0	0	0	S	2	2	0.02
24149	ZNF318		0	0	0		0	0	0		0	0	0	R	1	1	0		0	0	0	S	2	5	0.002		0	0	0	R	2	2	0.002		0	0	0	S	3	7	0.001		0	0	0	S	4	8	0.009
81887	LAS1L		0	0	0		0	0	0		0	0	0	A	1	1	0		0	0	0	S	1	1	0		0	0	0	S	2	2	0.02		0	0	0	S	1	2	0.02		0	0	0	S	1	1	0
57410	SCYL1		0	0	0		0	0	0		0	0	0	A	1	1	0		0	0	0	S	1	1	0		0	0	0	S	1	1	0.007		0	0	0	S	1	2	0.02		0	0	0	S	3	3	0.11
23072	HECW1		0	0	0		0	0	0		0	0	0	A	1	1	0.05		0	0	0	A	1	1	0.04		0	0	0	S	2	2	0.03		0	0	0	S	2	2	0.11		0	0	0	S	1	1	0.06
161779	PGBD4		0	0	0		0	0	0		0	0	0	A	1	1	0.03		0	0	0	A	1	1	0.03		0	0	0	A	1	1	0		0	0	0	S	1	1	0.03		0	0	0	A	1	1	0.04
23080	AVL9		0	0	0		0	0	0		0	0	0	S	1	1	0		0	0	0	S	1	1	0		0	0	0	S	1	2	0.02		0	0	0	S	1	1	0		0	0	0		0	0	0
30827	CXXC1		0	0	0		0	0	0		0	0	0	R	1	1	0		0	0	0	S	1	2	0.03		0	0	0	S	1	1	0.02		0	0	0	S	1	1	0		0	0	0		0	0	0
4343	MOV10		0	0	0		0	0	0		0	0	0	R	1	1	0.36		0	0	0	R	1	1	0.19		0	0	0	R	1	1	0.13		0	0	0	S	1	1	0.52		0	0	0		0	0	0
57663	USP29		0	0	0		0	0	0		0	0	0	A	1	1	0.15		0	0	0	A	1	1	0.14		0	0	0	R	1	3	0		0	0	0	S	1	1	0.16		0	0	0		0	0	0
79778	MICALL2		0	0	0		0	0	0		0	0	0	S	1	1	0.06		0	0	0	S	1	2	0.05		0	0	0	S	1	2	0.05		0	0	0		0	0	0		0	0	0	S	1	1	0.03
55090	MED9		0	0	0		0	0	0		0	0	0	S	1	3	0		0	0	0	S	1	3	0		0	0	0	S	1	2	0		0	0	0		0	0	0		0	0	0	S	1	1	0
4849	CNOT3		0	0	0		0	0	0		0	0	0	R	2	2	0.02		0	0	0	S	3	4	0.03		0	0	0	S	1	3	0		0	0	0		0	0	0		0	0	0	S	4	6	0.19
79693	YRDC		0	0	0		0	0	0		0	0	0	R	1	1	0.58		0	0	0	R	1	1	0.42		0	0	0	S	1	1	0.42		0	0	0		0	0	0		0	0	0	A	1	1	0.42
26115	TANC2		0	0	0		0	0	0		0	0	0	A	1	1	0		0	0	0	S	2	2	0.005		0	0	0	S	2	2	0.002		0	0	0		0	0	0		0	0	0	S	2	3	0.007
3833	KIFC1		0	0	0		0	0	0		0	0	0	R	1	1	0.03		0	0	0	S	1	1	0		0	0	0	A	1	1	0		0	0	0		0	0	0		0	0	0		0	0	0
55342	STRBP		0	0	0		0	0	0		0	0	0	R	1	1	0.02		0	0	0	R	2	2	0.05		0	0	0	S	3	4	0.03		0	0	0		0	0	0		0	0	0		0	0	0
51574	LARP7		0	0	0		0	0	0		0	0	0	R	1	1	0		0	0	0	A	1	1	0.03		0	0	0	S	1	1	0		0	0	0		0	0	0		0	0	0		0	0	0
84893	FBXO18		0	0	0		0	0	0		0	0	0	S	1	1	0.003		0	0	0	S	1	2	0.005		0	0	0		0	0	0	S	1	2	0.02	S	1	1	0.003		0	0	0	S	1	2	0
92595	ZNF764		0	0	0		0	0	0		0	0	0	A	1	1	0.11		0	0	0	A	1	3	1.9		0	0	0		0	0	0		0	0	0	S	1	1	0.2	S	1	1	3.1	A	1	1	0
6396	SEC13		0	0	0		0	0	0		0	0	0	S	1	1	0		0	0	0	S	1	2	0.14		0	0	0		0	0	0		0	0	0	S	1	1	0		0	0	0	S	1	2	0.11
5914	RARA		0	0	0		0	0	0		0	0	0	S	1	1	0		0	0	0	S	1	1	0		0	0	0		0	0	0		0	0	0	S	1	1	0		0	0	0	S	1	1	0
8106	PABPN1		0	0	0		0	0	0		0	0	0	S	1	1	0.6		0	0	0	S	2	2	0.81		0	0	0		0	0	0		0	0	0	S	1	2	0.09		0	0	0	S	1	1	0.12
27332	ZNF638		0	0	0		0	0	0		0	0	0	S	1	1	0		0	0	0	S	2	2	0.02		0	0	0		0	0	0		0	0	0	S	1	2	0.01		0	0	0	S	2	2	0.004
50628	GEMIN4		0	0	0		0	0	0		0	0	0	S	1	1	0		0	0	0	R	2	2	0.02		0	0	0		0	0	0		0	0	0	S	1	1	0		0	0	0	R	2	2	0
203074	PRSS55		0	0	0		0	0	0		0	0	0	R	1	3	0.38		0	0	0	S	1	1	0.5		0	0	0		0	0	0		0	0	0	S	1	5	1.7		0	0	0	R	1	1	1.1
1778	DYNC1H1		0	0	0		0	0	0		0	0	0	R	1	1	0		0	0	0	R	2	2	0.0007		0	0	0		0	0	0		0	0	0	S	1	1	0		0	0	0	S	7	7	0.009
79711	IPO4		0	0	0		0	0	0		0	0	0	A	1	1	0.6		0	0	0	S	1	1	0		0	0	0		0	0	0		0	0	0	S	1	1	0.003		0	0	0	S	2	2	0.02
919	CD247		0	0	0		0	0	0		0	0	0	R	1	1	0.15		0	0	0	A	1	1	0.09		0	0	0		0	0	0		0	0	0	S	1	1	0.27		0	0	0		0	0	0
10879	SMR3B		0	0	0		0	0	0		0	0	0	R	1	3	0.4		0	0	0	R	1	3	1.5		0	0	0		0	0	0		0	0	0	S	1	2	0.14		0	0	0		0	0	0
23301	EHBP1		0	0	0		0	0	0		0	0	0	R	1	1	0.01		0	0	0	R	1	1	0.02		0	0	0		0	0	0		0	0	0	S	1	1	0.01		0	0	0		0	0	0
23250	ATP11A		0	0	0		0	0	0		0	0	0	A	1	1	0		0	0	0	A	1	1	0		0	0	0		0	0	0		0	0	0	S	1	1	0		0	0	0		0	0	0
10101	NUBP2		0	0	0		0	0	0		0	0	0	S	1	1	0		0	0	0	S	1	2	0.07		0	0	0		0	0	0		0	0	0		0	0	0		0	0	0	S	2	3	0.74
6199	RPS6KB2		0	0	0		0	0	0		0	0	0	S	1	1	0		0	0	0	S	1	1	0		0	0	0		0	0	0		0	0	0		0	0	0		0	0	0	S	1	2	0
6598	SMARCB1		0	0	0		0	0	0		0	0	0	S	1	2	0		0	0	0	S	1	2	0.09		0	0	0		0	0	0		0	0	0		0	0	0		0	0	0	S	1	1	0
5686	PSMA5		0	0	0		0	0	0		0	0	0	S	1	2	0		0	0	0	S	3	4	0		0	0	0		0	0	0		0	0	0		0	0	0		0	0	0	S	1	1	0
6426	SRSF1		0	0	0		0	0	0		0	0	0	S	1	1	0		0	0	0	R	2	2	0.34		0	0	0		0	0	0		0	0	0		0	0	0		0	0	0	R	1	1	0.29
1981	EIF4G1		0	0	0		0	0	0		0	0	0	A	1	1	0.006		0	0	0	S	3	3	0.08		0	0	0		0	0	0		0	0	0		0	0	0		0	0	0	R	2	3	0.02
7402	UTRN		0	0	0		0	0	0		0	0	0	S	1	1	0.003		0	0	0	R	1	1	0.009		0	0	0		0	0	0		0	0	0		0	0	0		0	0	0		0	0	0
23386	NUDCD3		0	0	0		0	0	0		0	0	0	S	1	1	0.02		0	0	0	R	1	1	0		0	0	0		0	0	0		0	0	0		0	0	0		0	0	0		0	0	0
3615	IMPDH2		0	0	0		0	0	0		0	0	0	S	1	1	0		0	0	0	S	1	1	0		0	0	0		0	0	0		0	0	0		0	0	0		0	0	0		0	0	0
3146	HMGB1		0	0	0		0	0	0		0	0	0	R	1	1	0.38		0	0	0		0	0	0	A	1	1	0	S	2	2	0		0	0	0		0	0	0		0	0	0		0	0	0
9014	TAF1B		0	0	0		0	0	0		0	0	0	A	1	1	0.13		0	0	0		0	0	0	A	1	1	0.17		0	0	0		0	0	0	S	1	1	0		0	0	0		0	0	0
85395	FAM207A		0	0	0		0	0	0		0	0	0	S	1	1	0		0	0	0		0	0	0		0	0	0	S	1	1	0.09		0	0	0		0	0	0		0	0	0	S	1	2	0.18
10524	KAT5		0	0	0		0	0	0		0	0	0	S	2	4	0.05		0	0	0		0	0	0		0	0	0	S	1	2	0.05		0	0	0		0	0	0		0	0	0	S	1	2	0
63929	XPNPEP3		0	0	0		0	0	0		0	0	0	R	2	3	0.26		0	0	0		0	0	0		0	0	0	R	1	1	0		0	0	0		0	0	0		0	0	0	S	1	3	0.1
254225	RNF169		0	0	0		0	0	0		0	0	0	S	1	1	0		0	0	0		0	0	0		0	0	0	S	2	2	0.02		0	0	0		0	0	0		0	0	0		0	0	0
23011	RAB21		0	0	0		0	0	0		0	0	0	S	1	1	0		0	0	0		0	0	0		0	0	0	S	1	1	0		0	0	0		0	0	0		0	0	0		0	0	0
3267	AGFG1		0	0	0		0	0	0		0	0	0	R	1	1	0.02		0	0	0		0	0	0		0	0	0	S	1	1	0.02		0	0	0		0	0	0		0	0	0		0	0	0
60528	ELAC2		0	0	0		0	0	0		0	0	0	S	1	1	0.37		0	0	0		0	0	0		0	0	0		0	0	0	S	1	1	0.84	S	1	1	0		0	0	0		0	0	0
124995	MRPL10		0	0	0		0	0	0		0	0	0	A	1	1	0.04		0	0	0		0	0	0		0	0	0		0	0	0	S	1	2	0.13		0	0	0	S	1	1	0		0	0	0
7498	XDH		0	0	0		0	0	0		0	0	0	A	1	2	0		0	0	0		0	0	0		0	0	0		0	0	0	S	1	1	0.08		0	0	0		0	0	0	A	1	1	0.09
399687	MYO18A		0	0	0		0	0	0		0	0	0	A	1	1	0.001		0	0	0		0	0	0		0	0	0		0	0	0	S	1	1	0.05		0	0	0		0	0	0	A	1	1	0.09
23460	ABCA6		0	0	0		0	0	0		0	0	0	R	1	1	0.03		0	0	0		0	0	0		0	0	0		0	0	0	S	1	1	0.02		0	0	0		0	0	0		0	0	0
161497	STRC		0	0	0		0	0	0		0	0	0	R	1	1	0		0	0	0		0	0	0		0	0	0		0	0	0	S	1	2	0.16		0	0	0		0	0	0		0	0	0
100132247	NPIPB5		0	0	0		0	0	0		0	0	0	A	1	1	1.3		0	0	0		0	0	0		0	0	0		0	0	0	S	1	1	0.65		0	0	0		0	0	0		0	0	0
55717	WDR11		0	0	0		0	0	0		0	0	0	S	1	1	0		0	0	0		0	0	0		0	0	0		0	0	0		0	0	0	S	1	1	0		0	0	0	S	1	1	0
55020	TTC38		0	0	0		0	0	0		0	0	0	S	1	2	0		0	0	0		0	0	0		0	0	0		0	0	0		0	0	0	S	1	1	0.03		0	0	0	A	1	1	0.04
54440	SASH3		0	0	0		0	0	0		0	0	0	R	1	1	3.1		0	0	0		0	0	0		0	0	0		0	0	0		0	0	0	S	1	1	8.5		0	0	0	R	1	2	3.6
53940	FTHL17		0	0	0		0	0	0		0	0	0	R	1	3	0		0	0	0		0	0	0		0	0	0		0	0	0		0	0	0	S	1	2	0.08		0	0	0	A	1	3	0
23350	U2SURP		0	0	0		0	0	0		0	0	0	A	1	1	0.11		0	0	0		0	0	0		0	0	0		0	0	0		0	0	0	S	1	1	0.03		0	0	0	S	2	2	0.05
29803	REPIN1		0	0	0		0	0	0		0	0	0	S	1	1	0		0	0	0		0	0	0		0	0	0		0	0	0		0	0	0	S	1	1	0.004		0	0	0		0	0	0
2643	GCH1		0	0	0		0	0	0		0	0	0	R	1	1	0.15		0	0	0		0	0	0		0	0	0		0	0	0		0	0	0	S	1	1	0.33		0	0	0		0	0	0
221908	PPP1R35		0	0	0		0	0	0		0	0	0	R	1	1	0.02		0	0	0		0	0	0		0	0	0		0	0	0		0	0	0	S	1	1	0.03		0	0	0		0	0	0
9447	AIM2		0	0	0		0	0	0		0	0	0	R	1	1	0		0	0	0		0	0	0		0	0	0		0	0	0		0	0	0	S	1	1	0.06		0	0	0		0	0	0
256281	NUDT14		0	0	0		0	0	0		0	0	0	R	1	2	0.07		0	0	0		0	0	0		0	0	0		0	0	0		0	0	0	S	1	2	0.26		0	0	0		0	0	0
275	AMT		0	0	0		0	0	0		0	0	0	A	1	1	0		0	0	0		0	0	0		0	0	0		0	0	0		0	0	0	S	1	2	0.95		0	0	0		0	0	0
55031	USP47		0	0	0		0	0	0		0	0	0	A	1	1	0.04		0	0	0		0	0	0		0	0	0		0	0	0		0	0	0	S	1	2	0		0	0	0		0	0	0
284119	PTRF		0	0	0		0	0	0		0	0	0	A	1	1	0.18		0	0	0		0	0	0		0	0	0		0	0	0		0	0	0	S	1	2	0.13		0	0	0		0	0	0
79832	QSER1		0	0	0		0	0	0		0	0	0	A	1	1	0		0	0	0		0	0	0		0	0	0		0	0	0		0	0	0	S	1	1	0		0	0	0		0	0	0
114827	FHAD1		0	0	0		0	0	0		0	0	0	A	1	1	0.004		0	0	0		0	0	0		0	0	0		0	0	0		0	0	0	S	1	1	0.004		0	0	0		0	0	0
644168	DRGX		0	0	0		0	0	0		0	0	0	A	1	1	0.06		0	0	0		0	0	0		0	0	0		0	0	0		0	0	0	S	1	1	0.07		0	0	0		0	0	0
256764	WDR72		0	0	0		0	0	0		0	0	0	R	1	1	0		0	0	0		0	0	0		0	0	0		0	0	0		0	0	0		0	0	0	S	1	1	0.02	A	1	1	0
8497	PPFIA4		0	0	0		0	0	0		0	0	0	A	1	1	0		0	0	0		0	0	0		0	0	0		0	0	0		0	0	0		0	0	0	S	1	1	0.11	A	1	2	0
51157	ZNF580		0	0	0		0	0	0		0	0	0	S	1	1	0.08		0	0	0		0	0	0		0	0	0		0	0	0		0	0	0		0	0	0	S	1	1	0.13		0	0	0
23224	SYNE2		0	0	0		0	0	0		0	0	0	A	1	1	0.005		0	0	0		0	0	0		0	0	0		0	0	0		0	0	0		0	0	0	S	1	2	0		0	0	0
80184	CEP290		0	0	0		0	0	0		0	0	0	A	1	1	0		0	0	0		0	0	0		0	0	0		0	0	0		0	0	0		0	0	0	S	1	2	0.12		0	0	0
80150	ASRGL1		0	0	0		0	0	0		0	0	0	A	1	1	0.07		0	0	0		0	0	0		0	0	0		0	0	0		0	0	0		0	0	0	S	1	1	0.52		0	0	0
5932	RBBP8		0	0	0		0	0	0		0	0	0	A	1	2	0.76		0	0	0		0	0	0		0	0	0		0	0	0		0	0	0		0	0	0	S	1	1	0.14		0	0	0
1657	DMXL1		0	0	0		0	0	0		0	0	0	A	1	1	0		0	0	0		0	0	0		0	0	0		0	0	0		0	0	0		0	0	0	S	1	1	0		0	0	0
6093	ROCK1		0	0	0		0	0	0		0	0	0	S	1	1	0.29		0	0	0		0	0	0		0	0	0		0	0	0		0	0	0		0	0	0		0	0	0	R	1	1	0
3832	KIF11		0	0	0		0	0	0		0	0	0	R	1	1	0.007		0	0	0		0	0	0		0	0	0		0	0	0		0	0	0		0	0	0		0	0	0	S	2	2	0.02
8178	ELL		0	0	0		0	0	0		0	0	0	S	2	2	0		0	0	0		0	0	0		0	0	0		0	0	0		0	0	0		0	0	0		0	0	0		0	0	0
10250	SRRM1		0	0	0		0	0	0		0	0	0	S	1	1	0.002		0	0	0		0	0	0		0	0	0		0	0	0		0	0	0		0	0	0		0	0	0		0	0	0
10262	SF3B4		0	0	0		0	0	0		0	0	0	S	1	1	0		0	0	0		0	0	0		0	0	0		0	0	0		0	0	0		0	0	0		0	0	0		0	0	0
11000	SLC27A3		0	0	0		0	0	0		0	0	0	S	1	2	0.01		0	0	0		0	0	0		0	0	0		0	0	0		0	0	0		0	0	0		0	0	0		0	0	0
840	CASP7		0	0	0		0	0	0		0	0	0	S	1	1	0		0	0	0		0	0	0		0	0	0		0	0	0		0	0	0		0	0	0		0	0	0		0	0	0
1161	ERCC8		0	0	0		0	0	0		0	0	0	S	1	1	0.005		0	0	0		0	0	0		0	0	0		0	0	0		0	0	0		0	0	0		0	0	0		0	0	0
4049	LTA		0	0	0		0	0	0		0	0	0	S	1	1	0.31		0	0	0		0	0	0		0	0	0		0	0	0		0	0	0		0	0	0		0	0	0		0	0	0
5818	PVRL1		0	0	0		0	0	0		0	0	0	S	1	1	0		0	0	0		0	0	0		0	0	0		0	0	0		0	0	0		0	0	0		0	0	0		0	0	0
6829	SUPT5H		0	0	0		0	0	0		0	0	0	S	1	1	0.009		0	0	0		0	0	0		0	0	0		0	0	0		0	0	0		0	0	0		0	0	0		0	0	0
29763	PACSIN3		0	0	0		0	0	0		0	0	0	S	1	1	0.24		0	0	0		0	0	0		0	0	0		0	0	0		0	0	0		0	0	0		0	0	0		0	0	0
56889	TM9SF3		0	0	0		0	0	0		0	0	0	S	1	1	0.03		0	0	0		0	0	0		0	0	0		0	0	0		0	0	0		0	0	0		0	0	0		0	0	0
84246	MED10		0	0	0		0	0	0		0	0	0	S	1	1	0.19		0	0	0		0	0	0		0	0	0		0	0	0		0	0	0		0	0	0		0	0	0		0	0	0
6191	RPS4X		0	0	0		0	0	0		0	0	0	R	1	1	0.02		0	0	0	S	4	5	0.3		0	0	0	S	1	1	0.1		0	0	0	S	3	3	0.13		0	0	0	S	3	3	0.1
1478	CSTF2		0	0	0		0	0	0		0	0	0	S	1	1	0		0	0	0	S	2	2	0.04		0	0	0	R	1	1	0		0	0	0		0	0	0		0	0	0	S	1	1	0
51631	LUC7L2		0	0	0		0	0	0		0	0	0	S	1	1	0		0	0	0	S	2	2	0		0	0	0		0	0	0		0	0	0	S	1	1	0.005		0	0	0	R	1	1	0
6628	SNRPB		0	0	0		0	0	0		0	0	0	S	2	2	0.02		0	0	0	S	2	3	0.14		0	0	0	S	1	1	0.03		0	0	0	S	2	3	0.1		0	0	0	A	1	1	0.06
6638	SNRPN		0	0	0		0	0	0		0	0	0	S	2	2	0.01		0	0	0	S	2	3	0.14		0	0	0	S	1	1	0.03		0	0	0	S	2	3	0.09		0	0	0	A	1	1	0.06
253725	FAM21C		0	0	0		0	0	0		0	0	0	R	1	1	0.002		0	0	0	S	1	3	0		0	0	0	R	2	2	0		0	0	0	S	2	3	0		0	0	0	S	2	4	0.006
387680	FAM21A		0	0	0		0	0	0		0	0	0	R	1	1	0.002		0	0	0	S	1	3	0		0	0	0	R	2	2	0		0	0	0	S	2	3	0		0	0	0	S	2	4	0.006
8663	EIF3C		0	0	0		0	0	0		0	0	0	S	1	2	0		0	0	0	S	1	1	0		0	0	0	S	2	2	0		0	0	0		0	0	0		0	0	0		0	0	0
728689	EIF3CL		0	0	0		0	0	0		0	0	0	S	1	2	0		0	0	0	S	1	1	0		0	0	0	S	2	2	0		0	0	0		0	0	0		0	0	0		0	0	0
4629	MYH11		0	0	0		0	0	0		0	0	0	S	1	1	0		0	0	0	S	1	1	0		0	0	0		0	0	0		0	0	0	S	1	1	0		0	0	0	S	2	2	0
23283	CSTF2T		0	0	0		0	0	0		0	0	0	S	1	1	0		0	0	0	A	1	1	0		0	0	0	R	1	1	0		0	0	0		0	0	0		0	0	0	S	1	1	0
54845	ESRP1		0	0	0		0	0	0		0	0	0	S	1	1	0.03		0	0	0		0	0	0	A	1	1	0.17	A	1	1	0		0	0	0	A	1	1	0		0	0	0	A	1	2	0
55762	ZNF701		0	0	0		0	0	0		0	0	0	A	1	1	0.02		0	0	0		0	0	0		0	0	0		0	0	0		0	0	0	S	1	1	0		0	0	0	A	1	1	0
388559	ZNF888		0	0	0		0	0	0		0	0	0	A	1	1	0.02		0	0	0		0	0	0		0	0	0		0	0	0		0	0	0	S	1	1	0		0	0	0	A	1	1	0
7133	TNFRSF1B		0	0	0		0	0	0		0	0	0		0	0	0	R	1	1	6.8	A	1	2	0.06	R	1	3	6.9	A	1	2	0.7	S	1	1	0.05		0	0	0	S	1	1	0.05		0	0	0
23528	ZNF281		0	0	0		0	0	0		0	0	0		0	0	0	R	1	1	0	S	1	1	0.03	R	1	2	0.03	S	1	1	0		0	0	0	S	1	1	0		0	0	0	R	1	1	0.03
604	BCL6		0	0	0		0	0	0		0	0	0		0	0	0	A	1	1	0.009	R	1	1	0.01	A	1	1	0	R	1	1	0		0	0	0	S	1	1	0.03		0	0	0		0	0	0
54821	ERCC6L		0	0	0		0	0	0		0	0	0		0	0	0	R	1	3	0.02	S	1	1	0	S	2	2	0.05		0	0	0	S	1	1	0.009	S	1	1	0	S	1	1	0.03	S	2	2	0.01
9737	GPRASP1		0	0	0		0	0	0		0	0	0		0	0	0	A	1	1	0.01	R	1	1	0.05	S	1	1	1.1		0	0	0	S	1	3	0.59		0	0	0		0	0	0	A	1	1	0
5980	REV3L		0	0	0		0	0	0		0	0	0		0	0	0	A	2	2	0.1	A	1	1	0.06	A	1	1	0.01		0	0	0		0	0	0	S	1	1	0.13		0	0	0	A	1	1	0.004
90678	LRSAM1		0	0	0		0	0	0		0	0	0		0	0	0	R	1	1	0.11	S	1	2	0.008		0	0	0	A	1	1	0.08		0	0	0	S	2	3	0.06		0	0	0	S	4	6	0.03
50840	TAS2R14		0	0	0		0	0	0		0	0	0		0	0	0	A	1	1	0.03	A	1	1	0.15		0	0	0		0	0	0		0	0	0	S	1	1	0.09		0	0	0		0	0	0
10466	COG5		0	0	0		0	0	0		0	0	0		0	0	0	A	1	1	4.6	A	1	1	0		0	0	0		0	0	0		0	0	0		0	0	0		0	0	0	S	1	2	0
580	BARD1		0	0	0		0	0	0		0	0	0		0	0	0	S	1	2	0.02		0	0	0	S	1	2	0.04	S	1	2	0		0	0	0	S	1	1	0		0	0	0		0	0	0
55036	CCDC40		0	0	0		0	0	0		0	0	0		0	0	0	R	1	1	0.07		0	0	0	A	1	1	0.003	R	2	2	0		0	0	0		0	0	0	S	1	1	0.04	A	1	2	0.005
5934	RBL2		0	0	0		0	0	0		0	0	0		0	0	0	R	1	1	0		0	0	0	A	1	1	0	A	1	1	0		0	0	0		0	0	0	S	1	2	0		0	0	0
5859	QARS		0	0	0		0	0	0		0	0	0		0	0	0	A	1	1	0.06		0	0	0	A	1	1	0.05		0	0	0	S	1	1	0.02		0	0	0		0	0	0		0	0	0
7184	HSP90B1		0	0	0		0	0	0		0	0	0		0	0	0	S	1	1	0		0	0	0	S	1	2	0.15		0	0	0		0	0	0		0	0	0		0	0	0	A	1	1	0
9841	ZBTB24		0	0	0		0	0	0		0	0	0		0	0	0	S	1	2	0		0	0	0	S	1	1	0.05		0	0	0		0	0	0		0	0	0		0	0	0		0	0	0
3098	HK1		0	0	0		0	0	0		0	0	0		0	0	0	S	1	2	2.2		0	0	0		0	0	0	A	1	1	0	S	1	1	2.6		0	0	0		0	0	0		0	0	0
197131	UBR1		0	0	0		0	0	0		0	0	0		0	0	0	A	1	1	0.03		0	0	0		0	0	0		0	0	0	S	1	1	0.03		0	0	0	S	1	1	0.1		0	0	0
374654	KIF7		0	0	0		0	0	0		0	0	0		0	0	0	R	1	1	0		0	0	0		0	0	0		0	0	0	S	1	1	0.01		0	0	0		0	0	0	A	1	2	0.01
54665	RSBN1		0	0	0		0	0	0		0	0	0		0	0	0	S	1	1	0.02		0	0	0		0	0	0		0	0	0	S	1	1	0.01		0	0	0		0	0	0		0	0	0
22864	R3HDM2		0	0	0		0	0	0		0	0	0		0	0	0	R	1	1	0.03		0	0	0		0	0	0		0	0	0	S	1	1	0.03		0	0	0		0	0	0		0	0	0
643677	CCDC168		0	0	0		0	0	0		0	0	0		0	0	0	R	1	2	0		0	0	0		0	0	0		0	0	0	S	1	1	0.03		0	0	0		0	0	0		0	0	0
22876	INPP5F		0	0	0		0	0	0		0	0	0		0	0	0	A	1	1	0.27		0	0	0		0	0	0		0	0	0	S	1	1	0.08		0	0	0		0	0	0		0	0	0
23271	CAMSAP2		0	0	0		0	0	0		0	0	0		0	0	0	A	1	1	0.02		0	0	0		0	0	0		0	0	0	S	1	1	0		0	0	0		0	0	0		0	0	0
116966	WDR17		0	0	0		0	0	0		0	0	0		0	0	0	A	1	1	0.9		0	0	0		0	0	0		0	0	0	S	1	1	0		0	0	0		0	0	0		0	0	0
54704	PDP1		0	0	0		0	0	0		0	0	0		0	0	0	A	1	1	0.03		0	0	0		0	0	0		0	0	0	S	1	1	0.03		0	0	0		0	0	0		0	0	0
79947	DHDDS		0	0	0		0	0	0		0	0	0		0	0	0	A	1	1	0.1		0	0	0		0	0	0		0	0	0	S	1	1	0.06		0	0	0		0	0	0		0	0	0
84465	MEGF11		0	0	0		0	0	0		0	0	0		0	0	0	A	1	2	0		0	0	0		0	0	0		0	0	0	S	1	1	0		0	0	0		0	0	0		0	0	0
3043	HBB		0	0	0		0	0	0		0	0	0		0	0	0	S	1	1	0.54		0	0	0		0	0	0		0	0	0	S	1	1	0.06		0	0	0		0	0	0		0	0	0
139596	UPRT		0	0	0		0	0	0		0	0	0		0	0	0	A	1	1	0.08		0	0	0		0	0	0		0	0	0		0	0	0	S	1	1	0.25		0	0	0		0	0	0
3205	HOXA9		0	0	0		0	0	0		0	0	0		0	0	0	S	1	1	8.5		0	0	0		0	0	0		0	0	0		0	0	0		0	0	0	S	1	1	7.7	R	1	1	1.5
3235	HOXD9		0	0	0		0	0	0		0	0	0		0	0	0	S	1	1	6.9		0	0	0		0	0	0		0	0	0		0	0	0		0	0	0	S	1	1	6.3	R	1	1	1.2
667	DST		0	0	0		0	0	0		0	0	0		0	0	0	S	1	2	0.03		0	0	0		0	0	0		0	0	0		0	0	0		0	0	0	S	1	1	0.02		0	0	0
6263	RYR3		0	0	0		0	0	0		0	0	0		0	0	0	R	1	1	0.04		0	0	0		0	0	0		0	0	0		0	0	0		0	0	0	S	1	3	0.02		0	0	0
27071	DAPP1		0	0	0		0	0	0		0	0	0		0	0	0	A	1	1	0.36		0	0	0		0	0	0		0	0	0		0	0	0		0	0	0	S	1	1	0		0	0	0
54760	PCSK4		0	0	0		0	0	0		0	0	0		0	0	0	A	1	1	0.22		0	0	0		0	0	0		0	0	0		0	0	0		0	0	0	S	1	1	0.05		0	0	0
57018	CCNL1		0	0	0		0	0	0		0	0	0		0	0	0	S	1	1	0.06		0	0	0		0	0	0		0	0	0		0	0	0		0	0	0		0	0	0	S	1	1	2.5
2316	FLNA		0	0	0		0	0	0		0	0	0		0	0	0	A	1	1	0.05		0	0	0		0	0	0		0	0	0		0	0	0		0	0	0		0	0	0	S	3	4	0.009
23074	UHRF1BP1L		0	0	0		0	0	0		0	0	0		0	0	0	A	1	1	0.01		0	0	0		0	0	0		0	0	0		0	0	0		0	0	0		0	0	0	S	1	1	0.006
4155	MBP		0	0	0		0	0	0		0	0	0		0	0	0	S	1	2	0.06		0	0	0		0	0	0		0	0	0		0	0	0		0	0	0		0	0	0		0	0	0
5451	POU2F1		0	0	0		0	0	0		0	0	0		0	0	0	S	1	1	0		0	0	0		0	0	0		0	0	0		0	0	0		0	0	0		0	0	0		0	0	0
5924	RASGRF2		0	0	0		0	0	0		0	0	0		0	0	0	S	1	1	0.03		0	0	0		0	0	0		0	0	0		0	0	0		0	0	0		0	0	0		0	0	0
7015	TERT		0	0	0		0	0	0		0	0	0		0	0	0	S	1	1	5.7		0	0	0		0	0	0		0	0	0		0	0	0		0	0	0		0	0	0		0	0	0
151050	KANSL1L		0	0	0		0	0	0		0	0	0		0	0	0	S	2	2	0.05		0	0	0		0	0	0		0	0	0		0	0	0		0	0	0		0	0	0		0	0	0
7564	ZNF16		0	0	0		0	0	0		0	0	0		0	0	0	S	1	3	0.02		0	0	0		0	0	0		0	0	0		0	0	0		0	0	0		0	0	0		0	0	0
114880	OSBPL6		0	0	0		0	0	0		0	0	0		0	0	0	S	1	1	0		0	0	0		0	0	0		0	0	0		0	0	0		0	0	0		0	0	0		0	0	0
283820	NOMO2		0	0	0		0	0	0		0	0	0		0	0	0	A	1	1	0.07		0	0	0	A	1	1	0		0	0	0		0	0	0	S	1	1	0.83		0	0	0		0	0	0
408050	NOMO3		0	0	0		0	0	0		0	0	0		0	0	0	A	1	1	0.07		0	0	0	A	1	1	0		0	0	0		0	0	0	S	1	1	0.83		0	0	0		0	0	0
57582	KCNT1		0	0	0		0	0	0		0	0	0		0	0	0	A	1	1	0.07		0	0	0		0	0	0		0	0	0		0	0	0		0	0	0	S	1	1	0		0	0	0
4625	MYH7		0	0	0		0	0	0		0	0	0		0	0	0	R	1	1	0.02		0	0	0		0	0	0		0	0	0		0	0	0		0	0	0		0	0	0	S	1	1	0.34
146909	KIF18B		0	0	0		0	0	0		0	0	0		0	0	0	A	1	1	0	S	1	1	0.004	S	1	1	0.008		0	0	0	S	1	1	0.01		0	0	0		0	0	0		0	0	0
2074	ERCC6		0	0	0		0	0	0		0	0	0		0	0	0	A	1	1	0		0	0	0	A	1	2	0		0	0	0	S	1	2	0.007		0	0	0	S	1	1	0.009		0	0	0
8715	NOL4		0	0	0		0	0	0		0	0	0		0	0	0	A	1	1	0		0	0	0	A	1	1	0		0	0	0	S	1	1	0.02		0	0	0		0	0	0		0	0	0
23499	MACF1		0	0	0		0	0	0		0	0	0		0	0	0		0	0	0	A	1	2	0.08	S	1	1	0		0	0	0	S	1	1	0.009	S	1	1	0.006	S	1	1	0	A	1	1	0.002
55159	RFWD3		0	0	0		0	0	0		0	0	0		0	0	0		0	0	0	A	1	1	0.07	A	1	1	0.1		0	0	0	S	1	1	0.12		0	0	0	S	1	1	0.17		0	0	0
6651	SON		0	0	0		0	0	0		0	0	0		0	0	0		0	0	0	S	2	2	0.005	A	1	1	0.007		0	0	0		0	0	0		0	0	0		0	0	0	A	1	1	0
139562	OTUD6A		0	0	0		0	0	0		0	0	0		0	0	0		0	0	0	S	1	1	4.7	S	1	1	28.7		0	0	0		0	0	0		0	0	0		0	0	0		0	0	0
116113	FOXP4		0	0	0		0	0	0		0	0	0		0	0	0		0	0	0	R	1	1	0	S	2	3	0.2		0	0	0		0	0	0		0	0	0		0	0	0		0	0	0
85459	CEP295		0	0	0		0	0	0		0	0	0		0	0	0		0	0	0	A	1	1	0	S	1	1	0		0	0	0		0	0	0		0	0	0		0	0	0		0	0	0
63934	ZNF667		0	0	0		0	0	0		0	0	0		0	0	0		0	0	0	S	1	1	0.03	A	1	1	0		0	0	0		0	0	0		0	0	0		0	0	0		0	0	0
6293	VPS52		0	0	0		0	0	0		0	0	0		0	0	0		0	0	0	S	1	1	0		0	0	0	S	2	2	0	S	1	1	0.05		0	0	0		0	0	0	S	3	4	0.12
9739	SETD1A		0	0	0		0	0	0		0	0	0		0	0	0		0	0	0	S	2	2	0		0	0	0	S	1	2	0		0	0	0	S	1	1	0		0	0	0	S	5	5	0.2
51692	CPSF3		0	0	0		0	0	0		0	0	0		0	0	0		0	0	0	S	3	3	0.04		0	0	0	S	1	1	0.007		0	0	0	S	1	1	0.01		0	0	0	R	1	1	0
24148	PRPF6		0	0	0		0	0	0		0	0	0		0	0	0		0	0	0	S	2	3	0		0	0	0	R	1	1	0		0	0	0	S	1	1	0		0	0	0	S	2	2	0
157695	TDRP		0	0	0		0	0	0		0	0	0		0	0	0		0	0	0	A	1	1	0.31		0	0	0	A	1	2	0.73		0	0	0	S	1	1	0.26		0	0	0	S	1	1	0.28
3888	KRT82		0	0	0		0	0	0		0	0	0		0	0	0		0	0	0	S	1	1	0.72		0	0	0	S	1	1	0.09		0	0	0	S	1	1	0.28		0	0	0		0	0	0
168850	ZNF800		0	0	0		0	0	0		0	0	0		0	0	0		0	0	0	R	1	1	0		0	0	0	R	2	2	0.04		0	0	0	S	1	1	0		0	0	0		0	0	0
2314	FLII		0	0	0		0	0	0		0	0	0		0	0	0		0	0	0	A	1	1	0.03		0	0	0	R	1	1	0.01		0	0	0	S	1	1	0		0	0	0		0	0	0
989	SEPT7		0	0	0		0	0	0		0	0	0		0	0	0		0	0	0	S	1	1	0.02		0	0	0	S	4	7	0.15		0	0	0		0	0	0	S	1	1	0.16		0	0	0
54439	RBM27		0	0	0		0	0	0		0	0	0		0	0	0		0	0	0	S	3	4	0.09		0	0	0	S	2	2	0		0	0	0		0	0	0		0	0	0	S	2	2	0.01
29998	GLTSCR1		0	0	0		0	0	0		0	0	0		0	0	0		0	0	0	S	1	2	0		0	0	0	S	3	5	0.007		0	0	0		0	0	0		0	0	0	R	1	1	0
85440	DOCK7		0	0	0		0	0	0		0	0	0		0	0	0		0	0	0	S	2	2	0		0	0	0	A	1	1	0		0	0	0		0	0	0		0	0	0	S	4	4	0
374897	SBSN		0	0	0		0	0	0		0	0	0		0	0	0		0	0	0	S	1	1	0		0	0	0	A	1	1	0.01		0	0	0		0	0	0		0	0	0	S	1	1	0
55571	CNOT11		0	0	0		0	0	0		0	0	0		0	0	0		0	0	0	S	1	1	0.02		0	0	0	S	1	3	0.01		0	0	0		0	0	0		0	0	0	S	2	2	0.03
8788	DLK1		0	0	0		0	0	0		0	0	0		0	0	0		0	0	0	R	1	1	0.04		0	0	0	R	1	1	0		0	0	0		0	0	0		0	0	0	S	1	3	0.08
3329	HSPD1		0	0	0		0	0	0		0	0	0		0	0	0		0	0	0	R	2	3	0		0	0	0	R	2	2	0		0	0	0		0	0	0		0	0	0	S	2	2	0.04
57496	MKL2		0	0	0		0	0	0		0	0	0		0	0	0		0	0	0	R	2	3	0		0	0	0	R	1	1	0.02		0	0	0		0	0	0		0	0	0	S	2	3	0
6707	SPRR3		0	0	0		0	0	0		0	0	0		0	0	0		0	0	0	S	2	3	0.06		0	0	0	S	1	2	0		0	0	0		0	0	0		0	0	0		0	0	0
2312	FLG		0	0	0		0	0	0		0	0	0		0	0	0		0	0	0	S	2	2	0.004		0	0	0	S	1	1	0		0	0	0		0	0	0		0	0	0		0	0	0
3713	IVL		0	0	0		0	0	0		0	0	0		0	0	0		0	0	0	S	3	3	0		0	0	0	S	1	1	0		0	0	0		0	0	0		0	0	0		0	0	0
11200	CHEK2		0	0	0		0	0	0		0	0	0		0	0	0		0	0	0	S	1	1	0.09		0	0	0	R	1	1	0.07		0	0	0		0	0	0		0	0	0		0	0	0
5901	RAN		0	0	0		0	0	0		0	0	0		0	0	0		0	0	0	R	1	1	0		0	0	0	S	1	1	0.05		0	0	0		0	0	0		0	0	0		0	0	0
6462	SHBG		0	0	0		0	0	0		0	0	0		0	0	0		0	0	0	R	1	1	0.05		0	0	0	S	1	1	0.02		0	0	0		0	0	0		0	0	0		0	0	0
311	ANXA11		0	0	0		0	0	0		0	0	0		0	0	0		0	0	0	A	1	1	0.2		0	0	0	S	1	1	0		0	0	0		0	0	0		0	0	0		0	0	0
5083	PAX9		0	0	0		0	0	0		0	0	0		0	0	0		0	0	0	A	1	1	0		0	0	0	A	1	1	0.01		0	0	0	S	1	1	1.3		0	0	0		0	0	0
23033	DOPEY1		0	0	0		0	0	0		0	0	0		0	0	0		0	0	0	R	1	1	0.02		0	0	0		0	0	0	S	1	1	0		0	0	0		0	0	0	A	1	1	0.004
8997	KALRN		0	0	0		0	0	0		0	0	0		0	0	0		0	0	0	A	1	1	0		0	0	0		0	0	0	S	1	1	0.1		0	0	0		0	0	0	R	1	1	0.05
6453	ITSN1		0	0	0		0	0	0		0	0	0		0	0	0		0	0	0	A	1	1	0		0	0	0		0	0	0	S	1	2	7		0	0	0		0	0	0		0	0	0
7011	TEP1		0	0	0		0	0	0		0	0	0		0	0	0		0	0	0	A	1	1	0.005		0	0	0		0	0	0	S	1	1	0.01		0	0	0		0	0	0		0	0	0
63922	CHTF18		0	0	0		0	0	0		0	0	0		0	0	0		0	0	0	S	2	5	0.007		0	0	0		0	0	0		0	0	0	S	2	2	0		0	0	0	S	7	8	0.09
56897	WRNIP1		0	0	0		0	0	0		0	0	0		0	0	0		0	0	0	S	1	1	0		0	0	0		0	0	0		0	0	0	S	1	1	0		0	0	0	S	3	3	0.05
124245	ZC3H18		0	0	0		0	0	0		0	0	0		0	0	0		0	0	0	S	1	1	0.01		0	0	0		0	0	0		0	0	0	S	1	1	0.01		0	0	0	S	2	2	0.01
25930	PTPN23		0	0	0		0	0	0		0	0	0		0	0	0		0	0	0	S	1	1	0		0	0	0		0	0	0		0	0	0	S	1	1	0		0	0	0	S	3	3	0
3705	ITPK1		0	0	0		0	0	0		0	0	0		0	0	0		0	0	0	S	1	1	0.08		0	0	0		0	0	0		0	0	0	S	1	1	0		0	0	0	S	1	1	0
4665	NAB2		0	0	0		0	0	0		0	0	0		0	0	0		0	0	0	S	1	1	0		0	0	0		0	0	0		0	0	0	S	1	1	0		0	0	0	S	1	1	0
1475	CSTA		0	0	0		0	0	0		0	0	0		0	0	0		0	0	0	S	1	1	0.11		0	0	0		0	0	0		0	0	0	S	1	1	0		0	0	0	R	1	1	0
546	ATRX		0	0	0		0	0	0		0	0	0		0	0	0		0	0	0	A	2	2	0.03		0	0	0		0	0	0		0	0	0	S	1	1	0		0	0	0	S	1	1	0
3646	EIF3E		0	0	0		0	0	0		0	0	0		0	0	0		0	0	0	A	1	1	0.09		0	0	0		0	0	0		0	0	0	S	2	2	0.03		0	0	0	S	1	1	0
7353	UFD1L		0	0	0		0	0	0		0	0	0		0	0	0		0	0	0	A	1	1	0		0	0	0		0	0	0		0	0	0	S	1	1	0		0	0	0	S	2	2	0
9416	DDX23		0	0	0		0	0	0		0	0	0		0	0	0		0	0	0	A	1	1	0		0	0	0		0	0	0		0	0	0	S	1	1	0		0	0	0	S	1	1	0.009
65250	C5orf42		0	0	0		0	0	0		0	0	0		0	0	0		0	0	0	A	1	1	0.02		0	0	0		0	0	0		0	0	0	S	1	1	0.69		0	0	0	A	1	1	0.02
160287	LDHAL6A		0	0	0		0	0	0		0	0	0		0	0	0		0	0	0	A	1	1	0.12		0	0	0		0	0	0		0	0	0	S	1	1	0.09		0	0	0	A	1	2	0.12
56252	YLPM1		0	0	0		0	0	0		0	0	0		0	0	0		0	0	0	S	1	1	0		0	0	0		0	0	0		0	0	0	S	1	1	0		0	0	0		0	0	0
5576	PRKAR2A		0	0	0		0	0	0		0	0	0		0	0	0		0	0	0	S	1	1	0.04		0	0	0		0	0	0		0	0	0	S	1	1	0.01		0	0	0		0	0	0
54993	ZSCAN2		0	0	0		0	0	0		0	0	0		0	0	0		0	0	0	S	1	1	0.04		0	0	0		0	0	0		0	0	0	S	1	1	0		0	0	0		0	0	0
4589	MUC7		0	0	0		0	0	0		0	0	0		0	0	0		0	0	0	S	1	2	0.1		0	0	0		0	0	0		0	0	0	S	1	1	0		0	0	0		0	0	0
9788	MTSS1		0	0	0		0	0	0		0	0	0		0	0	0		0	0	0	R	1	1	0.03		0	0	0		0	0	0		0	0	0	S	1	1	0		0	0	0		0	0	0
9696	CROCC		0	0	0		0	0	0		0	0	0		0	0	0		0	0	0	R	1	1	0.23		0	0	0		0	0	0		0	0	0	S	1	1	0.003		0	0	0		0	0	0
84292	WDR83		0	0	0		0	0	0		0	0	0		0	0	0		0	0	0	R	1	1	0.12		0	0	0		0	0	0		0	0	0	S	1	1	0.09		0	0	0		0	0	0
3664	IRF6		0	0	0		0	0	0		0	0	0		0	0	0		0	0	0	A	1	1	0		0	0	0		0	0	0		0	0	0	S	1	1	0		0	0	0		0	0	0
5478	PPIA		0	0	0		0	0	0		0	0	0		0	0	0		0	0	0	A	1	1	0.05		0	0	0		0	0	0		0	0	0	S	1	1	0.04		0	0	0		0	0	0
2828	GPR4		0	0	0		0	0	0		0	0	0		0	0	0		0	0	0	A	1	1	0		0	0	0		0	0	0		0	0	0	S	1	1	0		0	0	0		0	0	0
22907	DHX30		0	0	0		0	0	0		0	0	0		0	0	0		0	0	0	A	1	1	0.03		0	0	0		0	0	0		0	0	0	S	1	1	0		0	0	0		0	0	0
23239	PHLPP1		0	0	0		0	0	0		0	0	0		0	0	0		0	0	0	A	1	2	0		0	0	0		0	0	0		0	0	0	S	1	2	0.008		0	0	0		0	0	0
84432	PROK1		0	0	0		0	0	0		0	0	0		0	0	0		0	0	0	R	1	1	1.7		0	0	0		0	0	0		0	0	0		0	0	0	S	1	1	1.5		0	0	0
55619	DOCK10		0	0	0		0	0	0		0	0	0		0	0	0		0	0	0	A	1	1	0		0	0	0		0	0	0		0	0	0		0	0	0	S	1	1	0.03		0	0	0
79736	TEFM		0	0	0		0	0	0		0	0	0		0	0	0		0	0	0	A	1	1	0.21		0	0	0		0	0	0		0	0	0		0	0	0	S	1	1	0.01		0	0	0
140699	MROH8		0	0	0		0	0	0		0	0	0		0	0	0		0	0	0	A	1	1	0.07		0	0	0		0	0	0		0	0	0		0	0	0	S	1	1	0.12		0	0	0
163050	ZNF564		0	0	0		0	0	0		0	0	0		0	0	0		0	0	0	A	1	1	0.09		0	0	0		0	0	0		0	0	0		0	0	0	S	1	1	0.27		0	0	0
60412	EXOC4		0	0	0		0	0	0		0	0	0		0	0	0		0	0	0	S	3	3	0.007		0	0	0		0	0	0		0	0	0		0	0	0		0	0	0	S	10	11	0.12
1315	COPB1		0	0	0		0	0	0		0	0	0		0	0	0		0	0	0	S	2	4	0.02		0	0	0		0	0	0		0	0	0		0	0	0		0	0	0	S	1	4	0.01
672	BRCA1		0	0	0		0	0	0		0	0	0		0	0	0		0	0	0	S	1	1	0.008		0	0	0		0	0	0		0	0	0		0	0	0		0	0	0	S	1	1	0
10921	RNPS1		0	0	0		0	0	0		0	0	0		0	0	0		0	0	0	S	1	1	0		0	0	0		0	0	0		0	0	0		0	0	0		0	0	0	A	1	1	0
27236	ARFIP1		0	0	0		0	0	0		0	0	0		0	0	0		0	0	0	S	1	1	0		0	0	0		0	0	0		0	0	0		0	0	0		0	0	0	S	2	2	0.09
55770	EXOC2		0	0	0		0	0	0		0	0	0		0	0	0		0	0	0	S	1	1	0		0	0	0		0	0	0		0	0	0		0	0	0		0	0	0	S	2	2	0
55915	LANCL2		0	0	0		0	0	0		0	0	0		0	0	0		0	0	0	S	1	1	0.38		0	0	0		0	0	0		0	0	0		0	0	0		0	0	0	R	1	1	0.17
25788	RAD54B		0	0	0		0	0	0		0	0	0		0	0	0		0	0	0	S	1	2	0		0	0	0		0	0	0		0	0	0		0	0	0		0	0	0	A	1	1	0.03
259282	BOD1L1		0	0	0		0	0	0		0	0	0		0	0	0		0	0	0	S	1	1	0		0	0	0		0	0	0		0	0	0		0	0	0		0	0	0	A	1	1	0.002
11128	POLR3A		0	0	0		0	0	0		0	0	0		0	0	0		0	0	0	R	2	2	0.02		0	0	0		0	0	0		0	0	0		0	0	0		0	0	0	S	5	5	0.02
8826	IQGAP1		0	0	0		0	0	0		0	0	0		0	0	0		0	0	0	R	2	2	0.02		0	0	0		0	0	0		0	0	0		0	0	0		0	0	0	S	3	5	0
51386	EIF3L		0	0	0		0	0	0		0	0	0		0	0	0		0	0	0	A	1	1	0.1		0	0	0		0	0	0		0	0	0		0	0	0		0	0	0	S	1	1	0.04
9500	MAGED1		0	0	0		0	0	0		0	0	0		0	0	0		0	0	0	S	1	1	0.003		0	0	0		0	0	0		0	0	0		0	0	0		0	0	0	A	1	1	0
765	CA6		0	0	0		0	0	0		0	0	0		0	0	0		0	0	0	S	1	1	0		0	0	0		0	0	0		0	0	0		0	0	0		0	0	0		0	0	0
2321	FLT1		0	0	0		0	0	0		0	0	0		0	0	0		0	0	0	S	1	1	1.9		0	0	0		0	0	0		0	0	0		0	0	0		0	0	0		0	0	0
6729	SRP54		0	0	0		0	0	0		0	0	0		0	0	0		0	0	0	S	1	2	0		0	0	0		0	0	0		0	0	0		0	0	0		0	0	0		0	0	0
6780	STAU1		0	0	0		0	0	0		0	0	0		0	0	0		0	0	0	S	1	1	0.03		0	0	0		0	0	0		0	0	0		0	0	0		0	0	0		0	0	0
9343	EFTUD2		0	0	0		0	0	0		0	0	0		0	0	0		0	0	0	S	1	1	0.02		0	0	0		0	0	0		0	0	0		0	0	0		0	0	0		0	0	0
9733	SART3		0	0	0		0	0	0		0	0	0		0	0	0		0	0	0	S	1	1	0.008		0	0	0		0	0	0		0	0	0		0	0	0		0	0	0		0	0	0
23360	FNBP4		0	0	0		0	0	0		0	0	0		0	0	0		0	0	0	S	1	1	0		0	0	0		0	0	0		0	0	0		0	0	0		0	0	0		0	0	0
84875	PARP10		0	0	0		0	0	0		0	0	0		0	0	0		0	0	0	S	1	1	0		0	0	0		0	0	0		0	0	0		0	0	0		0	0	0		0	0	0
140890	SREK1		0	0	0		0	0	0		0	0	0		0	0	0		0	0	0	S	1	1	0		0	0	0		0	0	0		0	0	0		0	0	0		0	0	0		0	0	0
4053	LTBP2		0	0	0		0	0	0		0	0	0		0	0	0		0	0	0	S	1	1	0.005		0	0	0		0	0	0		0	0	0		0	0	0		0	0	0		0	0	0
22948	CCT5		0	0	0		0	0	0		0	0	0		0	0	0		0	0	0	S	2	2	0		0	0	0		0	0	0		0	0	0		0	0	0		0	0	0		0	0	0
55749	CCAR1		0	0	0		0	0	0		0	0	0		0	0	0		0	0	0	S	2	2	0.04		0	0	0		0	0	0		0	0	0		0	0	0		0	0	0		0	0	0
200576	PIKFYVE		0	0	0		0	0	0		0	0	0		0	0	0		0	0	0	S	2	2	0.009		0	0	0		0	0	0		0	0	0		0	0	0		0	0	0		0	0	0
6188	RPS3		0	0	0		0	0	0		0	0	0		0	0	0		0	0	0	S	1	1	0		0	0	0		0	0	0		0	0	0		0	0	0		0	0	0		0	0	0
26043	UBXN7		0	0	0		0	0	0		0	0	0		0	0	0		0	0	0	S	1	1	0		0	0	0		0	0	0		0	0	0		0	0	0		0	0	0		0	0	0
29123	ANKRD11		0	0	0		0	0	0		0	0	0		0	0	0		0	0	0	S	1	1	0		0	0	0		0	0	0		0	0	0		0	0	0		0	0	0		0	0	0
64135	IFIH1		0	0	0		0	0	0		0	0	0		0	0	0		0	0	0	S	1	1	0		0	0	0		0	0	0		0	0	0		0	0	0		0	0	0		0	0	0
84321	THOC3		0	0	0		0	0	0		0	0	0		0	0	0		0	0	0	S	1	1	0		0	0	0		0	0	0		0	0	0		0	0	0		0	0	0		0	0	0
128077	LIX1L		0	0	0		0	0	0		0	0	0		0	0	0		0	0	0	S	1	1	0		0	0	0		0	0	0		0	0	0		0	0	0		0	0	0		0	0	0
984	CDK11B		0	0	0		0	0	0		0	0	0		0	0	0		0	0	0	R	2	2	0		0	0	0	R	1	1	0	S	1	2	0.11		0	0	0	S	1	1	0.08		0	0	0
728642	CDK11A		0	0	0		0	0	0		0	0	0		0	0	0		0	0	0	R	2	2	0		0	0	0	R	1	1	0	S	1	2	0.11		0	0	0	S	1	1	0.07		0	0	0
10274	STAG1		0	0	0		0	0	0		0	0	0		0	0	0		0	0	0	R	1	1	0.005		0	0	0		0	0	0	S	1	1	0	S	1	1	0	S	1	1	0.009	S	1	2	0.007
4951	OCM2		0	0	0		0	0	0		0	0	0		0	0	0		0	0	0	S	1	1	1.1		0	0	0		0	0	0	S	1	1	0.09		0	0	0	S	1	1	0.19		0	0	0
654231	OCM		0	0	0		0	0	0		0	0	0		0	0	0		0	0	0	S	1	1	1		0	0	0		0	0	0	S	1	1	0.08		0	0	0	S	1	1	0.16		0	0	0
1472	CST4		0	0	0		0	0	0		0	0	0		0	0	0		0	0	0	A	1	1	0		0	0	0		0	0	0		0	0	0	S	1	1	0.09		0	0	0		0	0	0
1856	DVL2		0	0	0		0	0	0		0	0	0		0	0	0		0	0	0	S	1	1	0		0	0	0		0	0	0		0	0	0		0	0	0		0	0	0	S	1	1	0
1857	DVL3		0	0	0		0	0	0		0	0	0		0	0	0		0	0	0	S	1	1	0		0	0	0		0	0	0		0	0	0		0	0	0		0	0	0	S	1	1	0
6429	SRSF4		0	0	0		0	0	0		0	0	0		0	0	0		0	0	0	S	1	1	0.04		0	0	0		0	0	0		0	0	0		0	0	0		0	0	0		0	0	0
6430	SRSF5		0	0	0		0	0	0		0	0	0		0	0	0		0	0	0	S	1	1	0.06		0	0	0		0	0	0		0	0	0		0	0	0		0	0	0		0	0	0
6431	SRSF6		0	0	0		0	0	0		0	0	0		0	0	0		0	0	0	S	1	1	0.03		0	0	0		0	0	0		0	0	0		0	0	0		0	0	0		0	0	0
718	C3		0	0	0		0	0	0		0	0	0		0	0	0		0	0	0	S	1	1	0.008		0	0	0		0	0	0		0	0	0		0	0	0		0	0	0		0	0	0
8724	SNX3		0	0	0		0	0	0		0	0	0		0	0	0		0	0	0	S	1	1	0		0	0	0		0	0	0		0	0	0		0	0	0		0	0	0		0	0	0
29934	SNX12		0	0	0		0	0	0		0	0	0		0	0	0		0	0	0	S	1	1	0		0	0	0		0	0	0		0	0	0		0	0	0		0	0	0		0	0	0
92342	METTL18		0	0	0		0	0	0		0	0	0		0	0	0		0	0	0	S	1	1	0.04		0	0	0		0	0	0		0	0	0		0	0	0		0	0	0		0	0	0
339977	LRRC66		0	0	0		0	0	0		0	0	0		0	0	0		0	0	0		0	0	0	A	1	1	0.15	A	1	1	0.008	S	1	1	0.14		0	0	0		0	0	0		0	0	0
51726	DNAJB11		0	0	0		0	0	0		0	0	0		0	0	0		0	0	0		0	0	0	S	1	1	0	R	1	1	0.5		0	0	0		0	0	0		0	0	0		0	0	0
2582	GALE		0	0	0		0	0	0		0	0	0		0	0	0		0	0	0		0	0	0	A	1	1	0.24	S	2	2	0.16		0	0	0		0	0	0		0	0	0		0	0	0
23063	WAPL		0	0	0		0	0	0		0	0	0		0	0	0		0	0	0		0	0	0	A	1	1	0	S	1	1	0		0	0	0		0	0	0		0	0	0		0	0	0
6641	SNTB1		0	0	0		0	0	0		0	0	0		0	0	0		0	0	0		0	0	0	R	1	1	0.02	R	1	1	0.03		0	0	0	S	1	1	0.03		0	0	0		0	0	0
6871	TADA2A		0	0	0		0	0	0		0	0	0		0	0	0		0	0	0		0	0	0	A	1	1	0		0	0	0	S	1	1	1.2	S	1	1	0.03		0	0	0		0	0	0
93487	MAPK1IP1L		0	0	0		0	0	0		0	0	0		0	0	0		0	0	0		0	0	0	S	1	3	1		0	0	0	S	1	2	0		0	0	0	S	1	2	1.5		0	0	0
4744	NEFH		0	0	0		0	0	0		0	0	0		0	0	0		0	0	0		0	0	0	S	1	3	0.07		0	0	0	S	1	1	0.03		0	0	0	S	1	1	0		0	0	0
220963	SLC16A9		0	0	0		0	0	0		0	0	0		0	0	0		0	0	0		0	0	0	A	1	1	0.85		0	0	0	S	1	1	0.77		0	0	0	S	1	1	0.59		0	0	0
3516	RBPJ		0	0	0		0	0	0		0	0	0		0	0	0		0	0	0		0	0	0	S	1	1	0.22		0	0	0	S	1	1	0.11		0	0	0		0	0	0		0	0	0
8927	BSN		0	0	0		0	0	0		0	0	0		0	0	0		0	0	0		0	0	0	R	1	1	0.0009		0	0	0	S	1	1	0		0	0	0		0	0	0		0	0	0
2922	GRP		0	0	0		0	0	0		0	0	0		0	0	0		0	0	0		0	0	0	R	1	1	0.41		0	0	0	S	1	1	0		0	0	0		0	0	0		0	0	0
5781	PTPN11		0	0	0		0	0	0		0	0	0		0	0	0		0	0	0		0	0	0	R	1	1	0.29		0	0	0	S	1	1	0.26		0	0	0		0	0	0		0	0	0
23235	SIK2		0	0	0		0	0	0		0	0	0		0	0	0		0	0	0		0	0	0	A	1	2	0		0	0	0	S	1	1	0		0	0	0		0	0	0		0	0	0
55669	MFN1		0	0	0		0	0	0		0	0	0		0	0	0		0	0	0		0	0	0	A	1	1	0.19		0	0	0	S	1	1	0.15		0	0	0		0	0	0		0	0	0
27040	LAT		0	0	0		0	0	0		0	0	0		0	0	0		0	0	0		0	0	0	A	1	1	14.7		0	0	0	S	1	1	0.91		0	0	0		0	0	0		0	0	0
80351	TNKS2		0	0	0		0	0	0		0	0	0		0	0	0		0	0	0		0	0	0	A	1	1	0.05		0	0	0	S	1	1	0.04		0	0	0		0	0	0		0	0	0
5091	PC		0	0	0		0	0	0		0	0	0		0	0	0		0	0	0		0	0	0	A	1	1	0		0	0	0		0	0	0	S	1	1	0.01		0	0	0	S	1	1	0
27296	TP53TG5		0	0	0		0	0	0		0	0	0		0	0	0		0	0	0		0	0	0	A	1	1	0.85		0	0	0		0	0	0	S	1	1	0.04		0	0	0	R	1	1	0.05
2804	GOLGB1		0	0	0		0	0	0		0	0	0		0	0	0		0	0	0		0	0	0	R	1	1	0.003		0	0	0		0	0	0	S	2	3	0		0	0	0		0	0	0
4593	MUSK		0	0	0		0	0	0		0	0	0		0	0	0		0	0	0		0	0	0	A	1	1	0		0	0	0		0	0	0	S	1	1	0.1		0	0	0		0	0	0
27	ABL2		0	0	0		0	0	0		0	0	0		0	0	0		0	0	0		0	0	0	A	1	1	0		0	0	0		0	0	0	S	1	1	0.04		0	0	0		0	0	0
163081	ZNF567		0	0	0		0	0	0		0	0	0		0	0	0		0	0	0		0	0	0	A	1	2	0.67		0	0	0		0	0	0	S	1	1	0	S	1	1	0.03	A	1	1	0
408186	OVOS		0	0	0		0	0	0		0	0	0		0	0	0		0	0	0		0	0	0	S	1	1	0.16		0	0	0		0	0	0		0	0	0	S	2	4	0.8		0	0	0
130074	FAM168B		0	0	0		0	0	0		0	0	0		0	0	0		0	0	0		0	0	0	R	1	1	0		0	0	0		0	0	0		0	0	0	S	1	1	0		0	0	0
55512	SMPD3		0	0	0		0	0	0		0	0	0		0	0	0		0	0	0		0	0	0	A	1	2	36.3		0	0	0		0	0	0		0	0	0	S	1	1	16.1		0	0	0
55727	BTBD7		0	0	0		0	0	0		0	0	0		0	0	0		0	0	0		0	0	0	A	1	1	0.07		0	0	0		0	0	0		0	0	0	S	1	2	0.08		0	0	0
57584	ARHGAP21		0	0	0		0	0	0		0	0	0		0	0	0		0	0	0		0	0	0	A	1	1	0.05		0	0	0		0	0	0		0	0	0	S	1	1	0.7		0	0	0
574414	PRR9		0	0	0		0	0	0		0	0	0		0	0	0		0	0	0		0	0	0	A	1	2	0		0	0	0		0	0	0		0	0	0	S	1	2	0.06		0	0	0
7187	TRAF3		0	0	0		0	0	0		0	0	0		0	0	0		0	0	0		0	0	0	A	1	1	0.07		0	0	0		0	0	0		0	0	0	S	1	1	0		0	0	0
27304	MOCS3		0	0	0		0	0	0		0	0	0		0	0	0		0	0	0		0	0	0	A	1	1	0.15		0	0	0		0	0	0		0	0	0	S	1	1	0.87		0	0	0
23373	CRTC1		0	0	0		0	0	0		0	0	0		0	0	0		0	0	0		0	0	0	S	1	2	0.5		0	0	0		0	0	0		0	0	0		0	0	0		0	0	0
26048	ZNF500		0	0	0		0	0	0		0	0	0		0	0	0		0	0	0		0	0	0	S	1	1	0.03		0	0	0		0	0	0		0	0	0		0	0	0		0	0	0
154288	KHDC3L		0	0	0		0	0	0		0	0	0		0	0	0		0	0	0		0	0	0	S	1	1	0.16		0	0	0		0	0	0		0	0	0		0	0	0		0	0	0
5414	SEPT4		0	0	0		0	0	0		0	0	0		0	0	0		0	0	0		0	0	0	S	1	1	1		0	0	0		0	0	0		0	0	0		0	0	0		0	0	0
64762	GAREM		0	0	0		0	0	0		0	0	0		0	0	0		0	0	0		0	0	0	S	1	1	0.27		0	0	0		0	0	0		0	0	0		0	0	0		0	0	0
26024	PTCD1		0	0	0		0	0	0		0	0	0		0	0	0		0	0	0		0	0	0	R	1	2	0.005		0	0	0		0	0	0	S	1	1	0		0	0	0		0	0	0
100526740	ATP5J2-PTCD1		0	0	0		0	0	0		0	0	0		0	0	0		0	0	0		0	0	0	R	1	2	0.005		0	0	0		0	0	0	S	1	1	0		0	0	0		0	0	0
23420	NOMO1		0	0	0		0	0	0		0	0	0		0	0	0		0	0	0		0	0	0	A	1	1	0		0	0	0		0	0	0	S	1	1	0.84		0	0	0		0	0	0
55833	UBAP2		0	0	0		0	0	0		0	0	0		0	0	0		0	0	0		0	0	0		0	0	0	S	3	3	0	S	1	1	0.05		0	0	0		0	0	0	S	4	6	0
84632	AFAP1L2		0	0	0		0	0	0		0	0	0		0	0	0		0	0	0		0	0	0		0	0	0	R	1	1	0.01	S	1	1	6.2		0	0	0		0	0	0		0	0	0
168667	BMPER		0	0	0		0	0	0		0	0	0		0	0	0		0	0	0		0	0	0		0	0	0	A	1	1	0		0	0	0	S	1	1	0.04	S	1	1	0.04		0	0	0
11073	TOPBP1		0	0	0		0	0	0		0	0	0		0	0	0		0	0	0		0	0	0		0	0	0	S	1	1	0		0	0	0	S	1	1	0		0	0	0	S	9	11	0.03
10844	TUBGCP2		0	0	0		0	0	0		0	0	0		0	0	0		0	0	0		0	0	0		0	0	0	S	3	4	0.006		0	0	0	S	1	1	0		0	0	0	S	4	6	0.04
5537	PPP6C		0	0	0		0	0	0		0	0	0		0	0	0		0	0	0		0	0	0		0	0	0	S	1	1	0.04		0	0	0	S	1	1	0.04		0	0	0	S	1	1	0
10557	RPP38		0	0	0		0	0	0		0	0	0		0	0	0		0	0	0		0	0	0		0	0	0	S	2	2	0		0	0	0	S	1	1	0.03		0	0	0	R	1	2	0.09
23212	RRS1		0	0	0		0	0	0		0	0	0		0	0	0		0	0	0		0	0	0		0	0	0	R	1	1	0.12		0	0	0	S	1	1	0.13		0	0	0	R	1	1	0.12
23383	MAU2		0	0	0		0	0	0		0	0	0		0	0	0		0	0	0		0	0	0		0	0	0	R	1	1	0		0	0	0	S	1	1	0		0	0	0	R	1	1	0.007
7994	KAT6A		0	0	0		0	0	0		0	0	0		0	0	0		0	0	0		0	0	0		0	0	0	S	1	1	0		0	0	0	S	1	1	0		0	0	0	A	1	1	0
8493	PPM1D		0	0	0		0	0	0		0	0	0		0	0	0		0	0	0		0	0	0		0	0	0	S	1	1	0		0	0	0	S	1	1	0		0	0	0		0	0	0
25949	SYF2		0	0	0		0	0	0		0	0	0		0	0	0		0	0	0		0	0	0		0	0	0	R	1	1	0		0	0	0	S	1	1	0		0	0	0		0	0	0
115908	CTHRC1		0	0	0		0	0	0		0	0	0		0	0	0		0	0	0		0	0	0		0	0	0	A	1	1	0.24		0	0	0	S	1	1	0.29		0	0	0		0	0	0
4363	ABCC1		0	0	0		0	0	0		0	0	0		0	0	0		0	0	0		0	0	0		0	0	0	A	1	1	0.43		0	0	0	S	1	1	0.54		0	0	0		0	0	0
27091	CACNG5		0	0	0		0	0	0		0	0	0		0	0	0		0	0	0		0	0	0		0	0	0	A	1	1	0		0	0	0	S	1	2	0.02		0	0	0		0	0	0
30833	NT5C		0	0	0		0	0	0		0	0	0		0	0	0		0	0	0		0	0	0		0	0	0	A	1	1	0.87		0	0	0	S	1	1	0.43		0	0	0		0	0	0
119	ADD2		0	0	0		0	0	0		0	0	0		0	0	0		0	0	0		0	0	0		0	0	0	A	1	1	0		0	0	0	S	1	1	0.07		0	0	0		0	0	0
10973	ASCC3		0	0	0		0	0	0		0	0	0		0	0	0		0	0	0		0	0	0		0	0	0	A	1	1	0		0	0	0	S	1	1	0		0	0	0		0	0	0
11196	SEC23IP		0	0	0		0	0	0		0	0	0		0	0	0		0	0	0		0	0	0		0	0	0	R	1	1	0		0	0	0		0	0	0	S	1	1	0.05	S	1	1	0
10042	HMGXB4		0	0	0		0	0	0		0	0	0		0	0	0		0	0	0		0	0	0		0	0	0	S	2	2	0.04		0	0	0		0	0	0	S	1	1	0		0	0	0
23077	MYCBP2		0	0	0		0	0	0		0	0	0		0	0	0		0	0	0		0	0	0		0	0	0	S	2	2	0.01		0	0	0		0	0	0	S	1	2	0.05		0	0	0
152206	CCDC13		0	0	0		0	0	0		0	0	0		0	0	0		0	0	0		0	0	0		0	0	0	S	1	1	0.009		0	0	0		0	0	0	S	1	1	0.16		0	0	0
26286	ARFGAP3		0	0	0		0	0	0		0	0	0		0	0	0		0	0	0		0	0	0		0	0	0	S	2	2	0.03		0	0	0		0	0	0	S	1	1	0.2		0	0	0
23127	COLGALT2		0	0	0		0	0	0		0	0	0		0	0	0		0	0	0		0	0	0		0	0	0	A	1	1	2.5		0	0	0		0	0	0	S	1	1	1.1		0	0	0
100130613	PRR32		0	0	0		0	0	0		0	0	0		0	0	0		0	0	0		0	0	0		0	0	0	A	1	1	0.06		0	0	0		0	0	0	S	1	1	0.55		0	0	0
790	CAD		0	0	0		0	0	0		0	0	0		0	0	0		0	0	0		0	0	0		0	0	0	A	1	1	0		0	0	0		0	0	0	S	1	1	0.04		0	0	0
651746	ANKRD33B		0	0	0		0	0	0		0	0	0		0	0	0		0	0	0		0	0	0		0	0	0	A	1	1	0.06		0	0	0		0	0	0	S	1	1	0.04		0	0	0
54497	HEATR5B		0	0	0		0	0	0		0	0	0		0	0	0		0	0	0		0	0	0		0	0	0	S	1	1	0		0	0	0		0	0	0		0	0	0	S	2	2	0
7913	DEK		0	0	0		0	0	0		0	0	0		0	0	0		0	0	0		0	0	0		0	0	0	S	1	1	0		0	0	0		0	0	0		0	0	0	S	1	1	0
23580	CDC42EP4		0	0	0		0	0	0		0	0	0		0	0	0		0	0	0		0	0	0		0	0	0	S	1	2	0		0	0	0		0	0	0		0	0	0	S	1	1	0
9568	GABBR2		0	0	0		0	0	0		0	0	0		0	0	0		0	0	0		0	0	0		0	0	0	S	1	1	0.01		0	0	0		0	0	0		0	0	0	S	1	1	0.21
6242	RTKN		0	0	0		0	0	0		0	0	0		0	0	0		0	0	0		0	0	0		0	0	0	S	2	2	0.04		0	0	0		0	0	0		0	0	0	S	1	1	0
832	CAPZB		0	0	0		0	0	0		0	0	0		0	0	0		0	0	0		0	0	0		0	0	0	S	1	2	0		0	0	0		0	0	0		0	0	0	A	1	1	0
5546	PRCC		0	0	0		0	0	0		0	0	0		0	0	0		0	0	0		0	0	0		0	0	0	S	1	2	0.07		0	0	0		0	0	0		0	0	0	A	1	1	0.02
51291	GMIP		0	0	0		0	0	0		0	0	0		0	0	0		0	0	0		0	0	0		0	0	0	S	1	2	0		0	0	0		0	0	0		0	0	0	S	1	1	0
55763	EXOC1		0	0	0		0	0	0		0	0	0		0	0	0		0	0	0		0	0	0		0	0	0	S	1	1	0		0	0	0		0	0	0		0	0	0	A	1	1	0
84190	METTL25		0	0	0		0	0	0		0	0	0		0	0	0		0	0	0		0	0	0		0	0	0	R	1	1	0		0	0	0		0	0	0		0	0	0	S	1	1	0.01
10053	AP1M2		0	0	0		0	0	0		0	0	0		0	0	0		0	0	0		0	0	0		0	0	0	R	1	1	0		0	0	0		0	0	0		0	0	0	S	1	1	0
9907	AP5Z1		0	0	0		0	0	0		0	0	0		0	0	0		0	0	0		0	0	0		0	0	0	R	1	2	0		0	0	0		0	0	0		0	0	0	S	1	2	0.01
55631	LRRC40		0	0	0		0	0	0		0	0	0		0	0	0		0	0	0		0	0	0		0	0	0	A	1	1	0		0	0	0		0	0	0		0	0	0	S	2	2	0.09
1289	COL5A1		0	0	0		0	0	0		0	0	0		0	0	0		0	0	0		0	0	0		0	0	0	A	1	1	0.07		0	0	0		0	0	0		0	0	0	S	1	1	0
56288	PARD3		0	0	0		0	0	0		0	0	0		0	0	0		0	0	0		0	0	0		0	0	0	A	1	1	0		0	0	0		0	0	0		0	0	0	S	4	5	0.02
1938	EEF2		0	0	0		0	0	0		0	0	0		0	0	0		0	0	0		0	0	0		0	0	0	S	1	1	0.02		0	0	0		0	0	0		0	0	0		0	0	0
4735	SEPT2		0	0	0		0	0	0		0	0	0		0	0	0		0	0	0		0	0	0		0	0	0	S	1	1	0		0	0	0		0	0	0		0	0	0		0	0	0
11140	CDC37		0	0	0		0	0	0		0	0	0		0	0	0		0	0	0		0	0	0		0	0	0	S	1	1	0		0	0	0		0	0	0		0	0	0		0	0	0
64744	SMAP2		0	0	0		0	0	0		0	0	0		0	0	0		0	0	0		0	0	0		0	0	0	S	1	1	0		0	0	0		0	0	0		0	0	0		0	0	0
6919	TCEA2		0	0	0		0	0	0		0	0	0		0	0	0		0	0	0		0	0	0		0	0	0	S	1	1	0.18		0	0	0		0	0	0		0	0	0		0	0	0
51053	GMNN		0	0	0		0	0	0		0	0	0		0	0	0		0	0	0		0	0	0		0	0	0	S	1	1	0		0	0	0		0	0	0		0	0	0		0	0	0
8890	EIF2B4		0	0	0		0	0	0		0	0	0		0	0	0		0	0	0		0	0	0		0	0	0	S	2	2	0.01		0	0	0		0	0	0		0	0	0		0	0	0
1411	CRYBA1		0	0	0		0	0	0		0	0	0		0	0	0		0	0	0		0	0	0		0	0	0	S	1	1	0.11		0	0	0		0	0	0		0	0	0		0	0	0
1476	CSTB		0	0	0		0	0	0		0	0	0		0	0	0		0	0	0		0	0	0		0	0	0	S	1	1	0.25		0	0	0		0	0	0		0	0	0		0	0	0
4059	BCAM		0	0	0		0	0	0		0	0	0		0	0	0		0	0	0		0	0	0		0	0	0	S	1	1	0		0	0	0		0	0	0		0	0	0		0	0	0
9685	CLINT1		0	0	0		0	0	0		0	0	0		0	0	0		0	0	0		0	0	0		0	0	0	S	1	1	0.04		0	0	0		0	0	0		0	0	0		0	0	0
10127	ZNF263		0	0	0		0	0	0		0	0	0		0	0	0		0	0	0		0	0	0		0	0	0	S	1	1	0		0	0	0		0	0	0		0	0	0		0	0	0
53938	PPIL3		0	0	0		0	0	0		0	0	0		0	0	0		0	0	0		0	0	0		0	0	0	S	1	1	0		0	0	0		0	0	0		0	0	0		0	0	0
89796	NAV1		0	0	0		0	0	0		0	0	0		0	0	0		0	0	0		0	0	0		0	0	0	S	1	1	0		0	0	0		0	0	0		0	0	0		0	0	0
122786	FRMD6		0	0	0		0	0	0		0	0	0		0	0	0		0	0	0		0	0	0		0	0	0	S	1	2	0.01		0	0	0		0	0	0		0	0	0		0	0	0
284083	C17orf47		0	0	0		0	0	0		0	0	0		0	0	0		0	0	0		0	0	0		0	0	0	S	1	1	0.07		0	0	0		0	0	0		0	0	0		0	0	0
54882	ANKHD1		0	0	0		0	0	0		0	0	0		0	0	0		0	0	0		0	0	0		0	0	0	S	1	1	0		0	0	0	S	1	1	0.0009		0	0	0	A	2	2	0
404734	ANKHD1-EIF4EBP3		0	0	0		0	0	0		0	0	0		0	0	0		0	0	0		0	0	0		0	0	0	S	1	1	0		0	0	0	S	1	1	0.0004		0	0	0	A	2	2	0
6640	SNTA1		0	0	0		0	0	0		0	0	0		0	0	0		0	0	0		0	0	0		0	0	0	R	1	1	0.04		0	0	0	S	1	1	0.04		0	0	0		0	0	0
6645	SNTB2		0	0	0		0	0	0		0	0	0		0	0	0		0	0	0		0	0	0		0	0	0	R	1	1	0.04		0	0	0	S	1	1	0.03		0	0	0		0	0	0
5075	PAX1		0	0	0		0	0	0		0	0	0		0	0	0		0	0	0		0	0	0		0	0	0	A	1	1	0.009		0	0	0	S	1	1	1		0	0	0		0	0	0
56681	SAR1A		0	0	0		0	0	0		0	0	0		0	0	0		0	0	0		0	0	0		0	0	0	S	1	1	0.14		0	0	0		0	0	0		0	0	0	S	2	2	0.17
114884	OSBPL10		0	0	0		0	0	0		0	0	0		0	0	0		0	0	0		0	0	0		0	0	0	A	1	1	0		0	0	0		0	0	0		0	0	0	S	3	5	0.06
51128	SAR1B		0	0	0		0	0	0		0	0	0		0	0	0		0	0	0		0	0	0		0	0	0	S	1	1	0.14		0	0	0		0	0	0		0	0	0	A	1	1	0
9582	APOBEC3B		0	0	0		0	0	0		0	0	0		0	0	0		0	0	0		0	0	0		0	0	0	S	1	1	0.007		0	0	0		0	0	0		0	0	0		0	0	0
[truncated: 529 more rows]
